# Supplementary material for: Identification of Differentially Expressed Genes Related to Dehydration Resistance in a Highly Drought-Tolerant Pear, Pyrus betulaefolia, as through RNA-Seq
Source: PLOS journal article supplement (doi:10.1371/journal.pone.0149352), 2016-02-22
Supplement: S12 (10.1371/journal.pone.0149352.s012) [file journal.pone.0149352.s012]

## Sheet: Sheet1
GeneID	Gene_length	D1-Expression	DH24-Expression	D1-RPKM	DH24-RPKM	log2 Ratio(DH24/D1)	Up-Down-Regulation(DH24/D1)	P-value	FDR	KEGG Orthology	GO Component	GO Function	GO Process	Blast nr
Pbr016558.1	204	98	0	90.9149	0.01	-13.1503	Down	3.60506e-29	7.77651e-28	-	-	-	-	gi|255584312|ref|XP_002532892.1|/1.62922e-25/conserved hypothetical protein [Ricinus communis]
Pbr010573.1	1065	259	0	46.0245	0.01	-12.1682	Down	6.47778e-76	3.2459e-74	K12126|1|2e-10|65.1|aly:ARALYDRAFT_471048|phytochrome-interacting factor 3	-	-	-	gi|225456461|ref|XP_002284464.1|/5.4943e-92/PREDICTED: transcription factor bHLH137 [Vitis vinifera]
Pbr025260.1	360	46	0	24.1821	0.01	-11.2397	Down	4.51682e-14	5.30994e-13	-	-	-	-	gi|12003390|gb|AAG43552.1|AF211534_1/2.62798e-15/Avr9/Cf-9 rapidly elicited protein 169 [Nicotiana tabacum]
Pbr039615.1	237	25	0	19.9632	0.01	-10.9631	Down	5.65028e-08	4.10382e-07	-	-	-	-	gi|224116396|ref|XP_002317287.1|/2.80262e-09/predicted protein [Populus trichocarpa]
Pbr006209.1	1410	134	0	17.9856	0.01	-10.8126	Down	1.27205e-39	3.552e-38	K14963|1|6e-18|90.5|sbi:SORBI_01g009580|COMPASS component SWD3	GO:0031234//extrinsic to internal side of plasma membrane	GO:0004683//calmodulin-dependent protein kinase activity	-	gi|255538504|ref|XP_002510317.1|/1.35106e-179/F-box and wd40 domain protein, putative [Ricinus communis]
Pbr019419.1	312	28	0	16.9841	0.01	-10.73	Down	7.60388e-09	6.02071e-08	-	-	-	-	gi|357506139|ref|XP_003623358.1|/9.54435e-10/hypothetical protein MTR_7g069970 [Medicago truncatula]
Pbr041470.1	1833	91	0	9.39546	0.01	-9.87582	Down	3.8844e-27	7.96389e-26	-	-	-	-	gi|225444893|ref|XP_002279486.1|/2.33504e-105/PREDICTED: putative transcription factor bHLH041 [Vitis vinifera]
Pbr025136.1	645	27	0	7.92215	0.01	-9.62975	Down	1.48382e-08	1.13825e-07	K09286|1|3e-17|86.7|ath:AT1G43160|EREBP-like factor	-	-	GO:0050896//response to stimulus	gi|292668969|gb|ADE41139.1|/5.49791e-89/AP2 domain class transcription factor [Malus x domestica]
Pbr031749.1	1161	46	0	7.49833	0.01	-9.55043	Down	4.51682e-14	5.31222e-13	K01087|1|1e-174|610|rcu:RCOM_1500340|trehalose 6-phosphate phosphatase [EC:3.1.3.12]	-	GO:0019203//carbohydrate phosphatase activity	GO:0005991//trehalose metabolic process	gi|255539761|ref|XP_002510945.1|/1.45553e-173/trehalose-6-phosphate synthase, putative [Ricinus communis]
Pbr006241.1	333	13	0	7.38819	0.01	-9.52908	Down	0.000172268	0.000774144	-	-	-	-	gi|255587344|ref|XP_002534237.1|/1.81984e-08/conserved hypothetical protein [Ricinus communis]
Pbr006137.1	1107	42	0	7.18027	0.01	-9.48789	Down	6.54954e-13	7.15732e-12	-	-	-	-	gi|225458249|ref|XP_002282152.1|/8.90941e-125/PREDICTED: tubby-like F-box protein 5 isoform 1 [Vitis vinifera]
Pbr009437.1	486	18	0	7.00931	0.01	-9.45313	Down	6.0881e-06	3.4401e-05	-	-	-	-	gi|255566540|ref|XP_002524255.1|/4.50704e-15/conserved hypothetical protein [Ricinus communis]
Pbr018391.1	387	13	0	6.35728	0.01	-9.31227	Down	0.000172268	0.000773762	K13448|1|3e-08|55.1|ath:AT3G51920|calcium-binding protein CML;K02183|2|1e-07|52.8|bdi:100823858|calmodulin	-	GO:0046872//metal ion binding	GO:0000904//cell morphogenesis involved in differentiation	gi|358248524|ref|NP_001239896.1|/9.56702e-50/uncharacterized protein LOC100801586 [Glycine max]
Pbr034079.1	639	20	0	5.92336	0.01	-9.21027	Down	1.5988e-06	9.78081e-06	K05770|1|2e-17|87.0|ppp:PHYPADRAFT_190625|benzodiazapine receptor	GO:0044431//Golgi apparatus part;GO:0031224//intrinsic to membrane	GO:0004871//signal transducer activity	GO:0009725//response to hormone stimulus;GO:0006970//response to osmotic stress	gi|255582174|ref|XP_002531881.1|/2.88174e-58/peripheral-type benzodiazepine receptor, putative [Ricinus communis]
Pbr030415.1	528	16	0	5.73489	0.01	-9.16362	Down	2.3183e-05	0.000120431	K13448|1|1e-37|154|pop:POPTR_767565|calcium-binding protein CML	-	GO:0046872//metal ion binding;GO:0016491//oxidoreductase activity	-	gi|224094366|ref|XP_002310148.1|/6.24922e-46/predicted protein [Populus trichocarpa]
Pbr033091.1	540	16	0	5.60745	0.01	-9.1312	Down	2.3183e-05	0.000120522	-	GO:0031410//cytoplasmic vesicle	-	-	gi|388493794|gb|AFK34963.1|/6.29584e-57/unknown [Lotus japonicus]
Pbr038351.1	861	25	0	5.4951	0.01	-9.102	Down	5.65028e-08	4.10491e-07	K13415|1|3e-46|183|aly:ARALYDRAFT_912402|protein brassinosteroid insensitive 1 [EC:2.7.10.1 2.7.11.1];K04733|3|8e-46|182|smo:SELMODRAFT_159261|interleukin-1 receptor-associated kinase 4 [EC:2.7.11.1]	GO:0044464//cell part	GO:0005488//binding;GO:0004672//protein kinase activity	GO:0009555//pollen development;GO:0001708//cell fate specification	gi|359493147|ref|XP_003634521.1|/7.09376e-65/PREDICTED: phytosulfokine receptor 2-like [Vitis vinifera]
Pbr037052.1	693	16	0	4.36944	0.01	-8.7713	Down	2.3183e-05	0.000120477	-	-	GO:0005488//binding	GO:0007049//cell cycle	gi|224063681|ref|XP_002301262.1|/3.4692e-87/predicted protein [Populus trichocarpa]
Pbr024506.1	927	21	0	4.28725	0.01	-8.74391	Down	8.1931e-07	5.1889e-06	-	-	-	-	gi|296088981|emb|CBI38684.3|/1.32183e-43/unnamed protein product [Vitis vinifera]
Pbr013631.1	1077	23	0	4.04158	0.01	-8.65878	Down	2.15158e-07	1.46564e-06	K09286|1|2e-33|141|pop:POPTR_571923|EREBP-like factor	-	-	GO:0048827//phyllome development;GO:0009987//cellular process	gi|292668903|gb|ADE41106.1|/1.60021e-147/AP2 domain class transcription factor [Malus x domestica]
Pbr031915.1	1272	26	0	3.86835	0.01	-8.59557	Down	2.8955e-08	2.16224e-07	-	-	-	-	gi|356532297|ref|XP_003534710.1|/2.49806e-121/PREDICTED: probable F-box protein At4g22030-like [Glycine max]
Pbr022896.2	714	13	0	3.44575	0.01	-8.42868	Down	0.000172268	0.000774016	-	-	-	-	-
Pbr015253.1	1929	29	0	2.84515	0.01	-8.15236	Down	3.89664e-09	3.17273e-08	-	GO:0044464//cell part	-	-	gi|255560705|ref|XP_002521366.1|/6.90897e-39/conserved hypothetical protein [Ricinus communis]
Pbr003454.1	963	14	0	2.75132	0.01	-8.10398	Down	8.82796e-05	0.000419201	K01183|1|2e-49|194|ath:AT3G12500|chitinase [EC:3.2.1.14]	GO:0016020//membrane	GO:0004553//hydrolase activity, hydrolyzing O-glycosyl compounds	GO:0009699//phenylpropanoid biosynthetic process;GO:0006970//response to osmotic stress;GO:0006026	gi|222139390|gb|ACM45714.1|/0/class II chitinase [Pyrus pyrifolia]
Pbr035788.1	1056	14	0	2.50901	0.01	-7.97098	Down	8.82796e-05	0.000419056	K09286|1|4e-50|196|rcu:RCOM_0273420|EREBP-like factor	-	-	GO:0009743//response to carbohydrate stimulus;GO:0050794//regulation of cellular process;GO:0006351//transcription, DNA-dependent;GO:0006950//response to stress	gi|292668893|gb|ADE41101.1|/1.75125e-106/AP2 domain class transcription factor [Malus x domestica]
Pbr012737.1	1161	15	0	2.44511	0.01	-7.93375	Down	4.52394e-05	0.000226106	K01087|1|3e-173|605|rcu:RCOM_1500340|trehalose 6-phosphate phosphatase [EC:3.1.3.12]	-	GO:0019203//carbohydrate phosphatase activity	GO:0005991//trehalose metabolic process	gi|255539761|ref|XP_002510945.1|/3.58509e-172/trehalose-6-phosphate synthase, putative [Ricinus communis]
Pbr018120.1	1275	16	0	2.37492	0.01	-7.89173	Down	2.3183e-05	0.000120454	K11228|1|6e-44|176|ota:Ot13g01170|mitogen-activated protein kinase kinase kinase [EC:2.7.11.1];K13414|2|3e-33|140|aly:ARALYDRAFT_489755|mitogen-activated protein kinase kinase kinase 1, plant [EC:2.7.11.25]	-	GO:0004672//protein kinase activity;GO:0000166//nucleotide binding	-	gi|225447061|ref|XP_002269660.1|/1.68122e-117/PREDICTED: mitogen-activated protein kinase kinase kinase A [Vitis vinifera]
Pbr002629.1	1509	16	0	2.00664	0.01	-7.64864	Down	2.3183e-05	0.0001205	K13407|1|1e-111|401|vvi:100259592|cytochrome P450, family 94, subfamily A, polypeptide 1 (fatty acid omega-hydroxylase) [EC:1.14.-.-];K00517|4|9e-102|369|ath:AT3G56630|[EC:1.14.-.-]	-	GO:0016712//oxidoreductase activity, acting on paired donors, with incorporation or reduction of molecular oxygen, reduced flavin or flavoprotein as one donor, and incorporation of one atom of oxygen;GO:0016713;GO:0005506//iron ion binding	GO:0006091//generation of precursor metabolites and energy	gi|255576331|ref|XP_002529058.1|/0/cytochrome P450, putative [Ricinus communis]
Pbr014684.1	1950	20	0	1.94104	0.01	-7.60069	Down	1.5988e-06	9.77862e-06	-	GO:0031224//intrinsic to membrane	GO:0015291//secondary active transmembrane transporter activity	GO:0015698//inorganic anion transport	gi|224107955|ref|XP_002314667.1|/0/sulfate/bicarbonate/oxalate exchanger and transporter sat-1 [Populus trichocarpa]
Pbr036903.1	1536	13	0	1.60174	0.01	-7.32349	Down	0.000172268	0.000773889	K13407|1|6e-123|439|vvi:100259592|cytochrome P450, family 94, subfamily A, polypeptide 1 (fatty acid omega-hydroxylase) [EC:1.14.-.-];K00517|3|8e-117|419|ath:AT3G56630|[EC:1.14.-.-]	GO:0031410//cytoplasmic vesicle	GO:0005506//iron ion binding;GO:0016712//oxidoreductase activity, acting on paired donors, with incorporation or reduction of molecular oxygen, reduced flavin or flavoprotein as one donor, and incorporation of one atom of oxygen	GO:0008152//metabolic process	gi|255540263|ref|XP_002511196.1|/0/cytochrome P450, putative [Ricinus communis]
Pbr033077.1	450	477	3	200.606	1.32614	-7.241	Down	7.05954e-133	6.199e-131	-	GO:0044464//cell part	GO:0003676//nucleic acid binding	GO:0051169//nuclear transport	gi|255580545|ref|XP_002531097.1|/2.64875e-34/hypothetical protein RCOM_1417730 [Ricinus communis]
Pbr001479.1	1938	15	0	1.46479	0.01	-7.19455	Down	4.52394e-05	0.000226189	K04733|1|2e-59|229|smo:SELMODRAFT_159261|interleukin-1 receptor-associated kinase 4 [EC:2.7.11.1];K13430|4|2e-56|218|zma:100283091|serine/threonine-protein kinase PBS1 [EC:2.7.11.1]	-	-	-	gi|147811956|emb|CAN74851.1|/2.14911e-173/hypothetical protein VITISV_019620 [Vitis vinifera]
Pbr016646.1	1539	865	7	106.369	0.904771	-6.87731	Down	3.6023e-237	5.89073e-235	-	-	-	-	gi|4539485|emb|CAA79329.1|/1.08784e-44/BP8 [Betula pendula]
Pbr036917.1	2232	13	0	1.10227	0.01	-6.78433	Down	0.000172268	0.000774271	K04733|1|3e-38|158|aly:ARALYDRAFT_916421|interleukin-1 receptor-associated kinase 4 [EC:2.7.11.1];K00924|3|6e-31|134|ath:AT1G66150|[EC:2.7.1.-]	GO:0043231//intracellular membrane-bounded organelle	GO:0003824//catalytic activity	-	gi|225456272|ref|XP_002279697.1|/0/PREDICTED: probable inactive leucine-rich repeat receptor-like protein kinase At3g03770-like [Vitis vinifera]
Pbr014394.1	498	109	1	41.4225	0.399439	-6.6963	Down	1.26053e-30	2.83556e-29	-	-	-	GO:0006952//defense response	gi|255583771|ref|XP_002532638.1|/2.33622e-25/conserved hypothetical protein [Ricinus communis]
Pbr014960.1	1224	1291	12	199.611	1.9502	-6.67742	Down	0	0	-	-	GO:0005488//binding	-	gi|255580545|ref|XP_002531097.1|/1.41838e-41/hypothetical protein RCOM_1417730 [Ricinus communis]
Pbr002719.1	2589	14	0	1.02338	0.01	-6.67719	Down	8.82796e-05	0.000419129	K13415|1|2e-79|295|sbi:SORBI_03g012040|protein brassinosteroid insensitive 1 [EC:2.7.10.1 2.7.11.1];K00924|3|3e-78|291|ath:AT1G75820|[EC:2.7.1.-]	-	GO:0016740//transferase activity	-	gi|224132304|ref|XP_002321306.1|/2.64445e-169/predicted protein [Populus trichocarpa]
Pbr030638.1	555	1776	18	605.604	6.45147	-6.5526	Down	0	0	K10525|1|1e-72|270|vvi:100257779|allene oxide cyclase [EC:5.3.99.6]	GO:0009536//plastid	GO:0009975//cyclase activity	-	gi|118489932|gb|ABK96763.1|/1.00726e-76/unknown [Populus trichocarpa x Populus deltoides]
Pbr042614.1	1641	356	4	41.0564	0.484876	-6.40385	Down	1.76909e-96	1.13409e-94	-	-	-	-	gi|255561120|ref|XP_002521572.1|/2.62007e-44/late embryogenesis abundant, putative [Ricinus communis]
Pbr009422.1	1431	249	3	32.9305	0.417024	-6.30315	Down	1.62341e-67	7.15061e-66	K10615|1|9e-14|76.6|cme:CMB070C|E3 ubiquitin-protein ligase HERC4 [EC:6.3.2.19];K11493|4|3e-10|65.1|ota:Ot03g05690|regulator of chromosome condensation	-	GO:0016772//transferase activity, transferring phosphorus-containing groups	GO:0006796//phosphate-containing compound metabolic process	gi|255566472|ref|XP_002524221.1|/0/Serine/threonine-protein kinase Nek8, putative [Ricinus communis]
Pbr040944.1	753	158	2	39.7101	0.528341	-6.23189	Down	4.24508e-43	1.29385e-41	-	-	-	-	gi|114145390|dbj|BAF30984.1|/6.02383e-51/basic helix-loop-helix protein [Nicotiana tabacum]
Pbr033737.1	3921	15	0	0.723992	0.01	-6.1779	Down	4.52394e-05	0.000226147	K11643|1|7e-07|55.5|ppp:PHYPADRAFT_145844|chromodomain-helicase-DNA-binding protein 4 [EC:3.6.4.12]	-	GO:0005488//binding	GO:0009743//response to carbohydrate stimulus	gi|359478537|ref|XP_002278840.2|/0/PREDICTED: uncharacterized protein LOC100243375 [Vitis vinifera]
Pbr014291.2	303	76	1	47.469	0.656503	-6.17604	Down	3.3917e-21	5.56634e-20	-	-	-	-	gi|224131164|ref|XP_002328470.1|/8.42767e-14/predicted protein [Populus trichocarpa]
Pbr002914.1	1029	76	1	13.9778	0.193314	-6.17604	Down	3.3917e-21	5.563e-20	K13425|1|2e-13|75.1|vvi:100256849|WRKY transcription factor 22;K13424|4|7e-12|69.7|zma:100281160|WRKY transcription factor 33	-	GO:0003677//DNA binding;GO:0001071//nucleic acid binding transcription factor activity	GO:0010467//gene expression	gi|255559625|ref|XP_002520832.1|/4.32752e-70/WRKY transcription factor, putative [Ricinus communis]
Pbr004914.1	612	149	2	46.0759	0.650067	-6.14728	Down	1.55311e-40	4.4366e-39	-	-	-	-	gi|255582779|ref|XP_002532165.1|/4.20373e-24/conserved hypothetical protein [Ricinus communis]
Pbr039618.1	303	66	1	41.2231	0.656503	-5.97251	Down	2.37206e-18	3.48835e-17	-	-	GO:0016757//transferase activity, transferring glycosyl groups	GO:0009725//response to hormone stimulus	gi|255557213|ref|XP_002519637.1|/1.48762e-10/conserved hypothetical protein [Ricinus communis]
Pbr031548.1	1044	60	1	10.8765	0.190537	-5.835	Down	1.19596e-16	1.62247e-15	K13426|1|7e-15|79.7|vvi:100251862|WRKY transcription factor 29;K13425|5|9e-13|72.8|vvi:100256849|WRKY transcription factor 22	-	-	-	gi|259121419|gb|ACV92029.1|/1.1204e-89/WRKY transcription factor 27 [(Populus tomentosa x P. bolleana) x P. tomentosa]
Pbr037910.1	1356	3739	63	521.837	9.24188	-5.81927	Down	0	0	K07300|1|1e-164|577|pop:POPTR_653119|Ca2+:H+ antiporter	GO:0031224//intrinsic to membrane	GO:0015075//ion transmembrane transporter activity	GO:0006811//ion transport	gi|222354619|gb|ACM48123.1|/0/calcium antiporter 1 [Malus x domestica]
Pbr001425.1	1044	170	3	30.8168	0.57161	-5.75254	Down	4.57196e-45	1.46716e-43	K13424|1|6e-12|70.1|zma:100281160|WRKY transcription factor 33;K13425|3|2e-11|68.6|rcu:RCOM_1616660|WRKY transcription factor 22	-	GO:0003677//DNA binding;GO:0001071//nucleic acid binding transcription factor activity	GO:0010467//gene expression	gi|255559625|ref|XP_002520832.1|/1.0228e-58/WRKY transcription factor, putative [Ricinus communis]
Pbr010914.1	1344	1001	19	140.953	2.81212	-5.64741	Down	2.9508e-257	5.1327e-255	K10257|1|0.0|720|pop:POPTR_820418|omega-3 fatty acid desaturase (delta-15 desaturase) [EC:1.14.19.-]	GO:0009941//chloroplast envelope	GO:0016705//oxidoreductase activity, acting on paired donors, with incorporation or reduction of molecular oxygen	GO:0006631//fatty acid metabolic process	gi|45385976|gb|AAS59833.1|/0/chloroplast omega-3 desaturase [Malus x domestica]
Pbr009089.1	1962	11038	215	1064.71	21.7981	-5.61011	Down	0	0	K09840|1|0.0|896|pop:POPTR_1116639|9-cis-epoxycarotenoid dioxygenase [EC:1.13.11.51]	-	GO:0016701//oxidoreductase activity, acting on single donors with incorporation of molecular oxygen	-	gi|224121552|ref|XP_002330729.1|/0/predicted protein [Populus trichocarpa]
Pbr013368.1	855	50	1	11.0673	0.232655	-5.57197	Down	8.05682e-14	9.31909e-13	-	-	-	-	gi|255570697|ref|XP_002526303.1|/9.21634e-41/kinase, putative [Ricinus communis]
Pbr028976.1	759	621	13	154.842	3.40707	-5.50612	Down	1.77239e-158	1.83342e-156	K09873|1|2e-91|327|aly:ARALYDRAFT_912085|aquaporin TIP	GO:0031224//intrinsic to membrane	-	GO:0006810//transport	gi|292653531|gb|ADE34283.1|/2.43543e-102/aquaporin TIP1;7 [Gossypium hirsutum]
Pbr039650.1	825	190	4	43.5852	0.964463	-5.49797	Down	2.36218e-49	8.11431e-48	K01695|1|3e-109|392|vvi:100252844|tryptophan synthase alpha chain [EC:4.2.1.20]	GO:0009532//plastid stroma;GO:0042579//microbody	GO:0046872//metal ion binding;GO:0016836//hydro-lyase activity	GO:0052482;GO:0006568//tryptophan metabolic process	gi|147771784|emb|CAN60260.1|/5.68284e-109/hypothetical protein VITISV_007742 [Vitis vinifera]
Pbr006290.1	672	47	1	13.2363	0.296013	-5.4827	Down	5.64828e-13	6.2072e-12	-	-	-	-	gi|359807538|ref|NP_001240894.1|/6.48128e-11/uncharacterized protein LOC100793725 [Glycine max]
Pbr017932.1	276	46	1	31.5419	0.720726	-5.45167	Down	1.08018e-12	1.16411e-11	-	-	-	-	-
Pbr025271.1	1842	2425	53	249.15	5.72355	-5.44396	Down	0	0	K09840|1|0.0|921|pop:POPTR_1116639|9-cis-epoxycarotenoid dioxygenase [EC:1.13.11.51]	-	GO:0016702//oxidoreductase activity, acting on single donors with incorporation of molecular oxygen, incorporation of two atoms of oxygen	GO:0008152//metabolic process	gi|224121552|ref|XP_002330729.1|/0/predicted protein [Populus trichocarpa]
Pbr002861.1	1266	45	1	6.72695	0.157125	-5.41997	Down	2.06488e-12	2.1848e-11	K06694|1|5e-11|67.4|rcu:RCOM_1621740|26S proteasome non-ATPase regulatory subunit 10	-	-	-	gi|359490025|ref|XP_003634016.1|/4.86505e-101/PREDICTED: LOW QUALITY PROTEIN: ankyrin repeat-containing protein At2g01680-like [Vitis vinifera]
Pbr005275.2	1698	42	1	4.68113	0.11715	-5.32043	Down	1.43857e-11	1.42444e-10	K15086|1|1e-165|581|rcu:RCOM_0906740|(3S)-linalool synthase [EC:4.2.3.25]	-	-	-	gi|332319699|sp|P0CV94.1|NES1_FRAAN/0/RecName: Full=(3S,6E)-nerolidol synthase 1; Short=FaNES1
Pbr032663.1	240	39	1	30.7534	0.828835	-5.21351	Down	9.97786e-11	9.27768e-10	-	-	-	-	gi|356549918|ref|XP_003543337.1|/1.53297e-07/PREDICTED: uncharacterized protein LOC100500586 [Glycine max]
Pbr032772.1	1107	173	5	29.5759	0.898466	-5.04081	Down	2.48264e-43	7.60925e-42	K00008|1|3e-171|599|mtr:MTR_054s0019|L-iditol 2-dehydrogenase [EC:1.1.1.14]	-	GO:0016616//oxidoreductase activity, acting on the CH-OH group of donors, NAD or NADP as acceptor;GO:0046914//transition metal ion binding	GO:0008152//metabolic process	gi|37932831|gb|AAP69750.1|/0/NAD-dependent sorbitol dehydrogenase 2 [Malus x domestica]
Pbr031108.1	1266	34	1	5.08258	0.157125	-5.01558	Down	2.48762e-09	2.05987e-08	K01058|1|3e-66|250|gmx:100816744|phospholipase A1 [EC:3.1.1.32]	GO:0009532//plastid stroma	GO:0004091//carboxylesterase activity	GO:0006952//defense response;GO:0009694//jasmonic acid metabolic process;GO:0016049//cell growth;GO:0009668;GO:0006641//triglyceride metabolic process;GO:0010260//organ senescence	gi|225433768|ref|XP_002268142.1|/1.52915e-179/PREDICTED: galactolipase DONGLE, chloroplastic-like [Vitis vinifera]
Pbr021489.1	513	33	1	12.1741	0.387759	-4.97251	Down	4.7233e-09	3.81397e-08	K13448|1|4e-49|191|rcu:RCOM_0561520|calcium-binding protein CML	-	GO:0005488//binding	-	gi|133902320|gb|ABO41848.1|/3.25011e-49/putative calcium-binding protein [Gossypium hirsutum]
Pbr002724.1	2655	33	1	2.35228	0.0749229	-4.97251	Down	4.7233e-09	3.81285e-08	K13415|1|2e-83|309|sbi:SORBI_03g012040|protein brassinosteroid insensitive 1 [EC:2.7.10.1 2.7.11.1];K08286|5|4e-83|308|ath:AT4G28490|protein-serine/threonine kinase [EC:2.7.11.-]	-	GO:0016740//transferase activity	-	gi|224132304|ref|XP_002321306.1|/5.27417e-173/predicted protein [Populus trichocarpa]
Pbr032372.1	1398	65	2	8.79924	0.284579	-4.95048	Down	7.68228e-17	1.05003e-15	K14489|1|3e-10|64.7|vvi:100263145|arabidopsis histidine kinase 2/3/4 (cytokinin receptor) [EC:2.7.13.3]	GO:0030312//external encapsulating structure	GO:0004553//hydrolase activity, hydrolyzing O-glycosyl compounds	GO:0008152//metabolic process	gi|13548679|dbj|BAB40807.1|/8.13866e-161/endo-1,3-beta-glucanase-like protein [Pyrus pyrifolia]
Pbr006736.2	810	32	1	7.4766	0.245581	-4.92811	Down	8.96136e-09	7.05262e-08	K15086|1|1e-105|380|rcu:RCOM_0906740|(3S)-linalool synthase [EC:4.2.3.25]	-	-	-	gi|332319701|sp|P0CV95.1|NES2_FRAAN/2.10191e-124/RecName: Full=(3S,6E)-nerolidol synthase 2, chloroplastic/mitochondrial; Short=FaNES2; Flags: Precursor
Pbr025087.1	2376	159	5	12.6646	0.418604	-4.91907	Down	1.91405e-39	5.32289e-38	K13457|1|8e-18|90.9|osa:4342596|disease resistance protein RPM1;K03013|2|5e-17|88.2|vvi:100258335|DNA-directed RNA polymerases I, II, and III subunit RPABC1;K13460|4|7e-17|87.8|ath:AT1G12220|disease resistance protein RPS5;K13459|5|2e-16|86.3|vvi:100254298|disease resistance protein RPS2	-	-	-	gi|359480461|ref|XP_002268207.2|/0/PREDICTED: probable disease resistance protein At5g66900-like [Vitis vinifera]
Pbr041712.1	1644	121	4	13.9291	0.483991	-4.84698	Down	4.43006e-30	9.76437e-29	K00511|1|0.0|728|vvi:100265235|squalene monooxygenase [EC:1.14.13.132]	GO:0031224//intrinsic to membrane	GO:0004497//monooxygenase activity;GO:0050662//coenzyme binding	GO:0008152//metabolic process	gi|395406306|gb|AFN61200.1|/0/squalene epoxidase [Chlorophytum borivilianum]
Pbr000252.1	600	29	1	9.14715	0.331534	-4.78609	Down	6.08904e-08	4.40258e-07	K02183|1|2e-07|53.9|osa:4327351|calmodulin;K13412|2|2e-07|53.9|vvi:100267574|calcium-dependent protein kinase [EC:2.7.11.1];K13448|3|2e-07|53.5|ath:AT3G51920|calcium-binding protein CML	-	GO:0046872//metal ion binding	-	gi|255567475|ref|XP_002524717.1|/2.30239e-35/ccd1, putative [Ricinus communis]
Pbr036052.1	414	58	2	26.5135	0.960968	-4.78609	Down	6.67402e-15	8.26205e-14	-	-	-	-	-
Pbr004104.1	2271	316	11	26.3335	0.963507	-4.77246	Down	7.01162e-76	3.50697e-74	-	-	-	GO:0050896//response to stimulus	gi|27529824|dbj|BAC53927.1|/9.23871e-54/hypothetical protein [Nicotiana tabacum]
Pbr022241.1	1425	226	8	30.0146	1.11675	-4.74829	Down	1.67446e-54	6.22996e-53	K14329|1|2e-65|248|ath:AT5G61160|agmatine coumaroyltransferase [EC:2.3.1.64 2.3.1.-];K13065|3|8e-21|100|zma:100279386|shikimate O-hydroxycinnamoyltransferase [EC:2.3.1.133]	-	GO:0016740//transferase activity	-	gi|356567100|ref|XP_003551761.1|/1.82378e-115/PREDICTED: anthocyanin 5-aromatic acyltransferase-like [Glycine max]
Pbr022333.1	1107	28	1	4.78685	0.179693	-4.73547	Down	1.15114e-07	8.0855e-07	-	-	-	-	gi|302399025|gb|ADL36807.1|/0/NAC domain class transcription factor [Malus x domestica]
Pbr021630.1	1362	304	11	42.2411	1.60655	-4.71661	Down	1.4116e-72	6.73939e-71	K10257|1|0.0|725|pop:POPTR_831926|omega-3 fatty acid desaturase (delta-15 desaturase) [EC:1.14.19.-]	GO:0009941//chloroplast envelope	GO:0016705//oxidoreductase activity, acting on paired donors, with incorporation or reduction of molecular oxygen	GO:0006631//fatty acid metabolic process	gi|224091014|ref|XP_002309146.1|/0/predicted protein [Populus trichocarpa]
Pbr003096.1	618	165	6	50.5283	1.93127	-4.70947	Down	5.8354e-40	1.64118e-38	-	-	-	-	gi|302143750|emb|CBI22611.3|/7.83916e-26/unnamed protein product [Vitis vinifera]
Pbr022234.1	204	9792	358	9084.07	349.086	-4.70168	Down	0	0	-	-	-	-	gi|224127564|ref|XP_002329309.1|/3.75598e-22/predicted protein [Populus trichocarpa]
Pbr012385.1	2007	81	3	7.63795	0.29734	-4.683	Down	3.6986e-20	5.81826e-19	-	-	-	-	gi|359481698|ref|XP_002277149.2|/0/PREDICTED: DUF246 domain-containing protein At1g04910 [Vitis vinifera]
Pbr000128.1	1338	27	1	3.81897	0.14867	-4.683	Down	2.17398e-07	1.47942e-06	-	-	-	-	gi|356532297|ref|XP_003534710.1|/1.85269e-106/PREDICTED: probable F-box protein At4g22030-like [Glycine max]
Pbr005926.1	1002	106	4	20.0206	0.794093	-4.65603	Down	6.03442e-26	1.17458e-24	K08241|1|2e-106|383|vvi:100260930|jasmonate O-methyltransferase [EC:2.1.1.141]	-	GO:0008757//S-adenosylmethionine-dependent methyltransferase activity	GO:0006950//response to stress;GO:0009694//jasmonic acid metabolic process;GO:0008610//lipid biosynthetic process;GO:0007165//signal transduction	gi|225458205|ref|XP_002281588.1|/2.32916e-105/PREDICTED: jasmonate O-methyltransferase [Vitis vinifera]
Pbr022335.1	333	53	2	30.1211	1.19472	-4.65603	Down	1.59427e-13	1.81408e-12	-	-	-	-	gi|224128221|ref|XP_002329111.1|/3.53519e-20/predicted protein [Populus trichocarpa]
Pbr020061.1	909	1968	75	409.732	16.4126	-4.64181	Down	0	0	-	GO:0044464//cell part	-	-	gi|224137266|ref|XP_002327083.1|/2.81688e-83/predicted protein [Populus trichocarpa]
Pbr017996.1	2058	26	1	2.39093	0.0966572	-4.62855	Down	4.10112e-07	2.68837e-06	K07195|1|1e-75|282|ppp:PHYPADRAFT_164957|exocyst complex component 7	GO:0043234//protein complex	-	GO:0016192//vesicle-mediated transport	gi|224127256|ref|XP_002320026.1|/0/predicted protein [Populus trichocarpa]
Pbr020056.1	1410	255	10	34.2263	1.41078	-4.60054	Down	3.05986e-60	1.2128e-58	K14963|1|8e-18|90.1|aly:ARALYDRAFT_911935|COMPASS component SWD3	GO:0031234//extrinsic to internal side of plasma membrane	GO:0004683//calmodulin-dependent protein kinase activity	-	gi|255538504|ref|XP_002510317.1|/0/F-box and wd40 domain protein, putative [Ricinus communis]
Pbr033986.1	759	74	3	18.4514	0.786247	-4.5526	Down	3.08042e-18	4.51789e-17	K09873|1|1e-99|360|aly:ARALYDRAFT_912085|aquaporin TIP	GO:0031224//intrinsic to membrane	-	GO:0006810//transport	gi|292653531|gb|ADE34283.1|/1.53037e-110/aquaporin TIP1;7 [Gossypium hirsutum]
Pbr041090.1	420	74	3	33.3443	1.42086	-4.5526	Down	3.08042e-18	4.51547e-17	K14488|1|6e-35|144|vvi:100258180|SAUR family protein	-	-	-	gi|225465036|ref|XP_002266248.1|/5.58548e-34/PREDICTED: uncharacterized protein LOC100258180 [Vitis vinifera]
Pbr021741.1	759	511	21	127.414	5.50373	-4.53297	Down	3.10124e-118	2.48363e-116	-	-	GO:0003676//nucleic acid binding	GO:0006351//transcription, DNA-dependent;GO:0009743//response to carbohydrate stimulus	gi|356550097|ref|XP_003543426.1|/2.62865e-86/PREDICTED: NAC domain-containing protein 90-like [Glycine max]
Pbr023785.1	198	24	1	22.9396	1.00465	-4.51308	Down	1.45417e-06	8.94612e-06	-	-	-	-	gi|255544268|ref|XP_002513196.1|/2.22582e-06/conserved hypothetical protein [Ricinus communis]
Pbr041270.1	1062	5657	239	1008.09	44.7665	-4.49307	Down	0	0	K00540|1|6e-120|428|ath:AT5G64210|[EC:1.-.-.-]	GO:0019866//organelle inner membrane;GO:0043231//intracellular membrane-bounded organelle;GO:0031224//intrinsic to membrane	GO:0043169//cation binding;GO:0003824//catalytic activity	GO:0051234//establishment of localization;GO:0032501//multicellular organismal process;GO:0006091//generation of precursor metabolites and energy	gi|283488059|gb|ADB24723.1|/7.62755e-126/mitochondrial alternative oxidase 2a [Daucus carota]
Pbr019437.1	3117	23	1	1.39647	0.0638179	-4.45167	Down	2.73276e-06	1.62449e-05	K13420|1|5e-58|224|sbi:SORBI_06g028760|LRR receptor-like serine/threonine-protein kinase FLS2 [EC:2.7.11.1]	-	-	-	gi|359481304|ref|XP_002270356.2|/0/PREDICTED: LRR receptor-like serine/threonine-protein kinase FLS2-like [Vitis vinifera]
Pbr035941.2	2001	344	15	32.535	1.49116	-4.44749	Down	3.73404e-79	1.95725e-77	-	-	-	-	gi|359481698|ref|XP_002277149.2|/0/PREDICTED: DUF246 domain-containing protein At1g04910 [Vitis vinifera]
Pbr025089.1	438	22	1	9.50578	0.454156	-4.38754	Down	5.12796e-06	2.92541e-05	K12619|1|2e-19|92.8|osa:4349826|5'-3' exoribonuclease 2 [EC:3.1.13.-]	-	-	-	gi|302142823|emb|CBI20118.3|/6.41683e-46/unnamed protein product [Vitis vinifera]
Pbr035774.1	906	22	1	4.59551	0.219559	-4.38754	Down	5.12796e-06	2.9248e-05	K09286|1|3e-48|190|rcu:RCOM_0273420|EREBP-like factor	-	-	GO:0009743//response to carbohydrate stimulus;GO:0050794//regulation of cellular process;GO:0006351//transcription, DNA-dependent;GO:0006950//response to stress	gi|292668893|gb|ADE41101.1|/8.33703e-120/AP2 domain class transcription factor [Malus x domestica]
Pbr027275.1	306	22	1	13.6063	0.650067	-4.38754	Down	5.12796e-06	2.92663e-05	-	-	-	-	-
Pbr005763.1	771	22	1	5.40017	0.258003	-4.38754	Down	5.12796e-06	2.92602e-05	-	-	-	-	gi|224061917|ref|XP_002300663.1|/4.03409e-31/lysine/histidine transporter [Populus trichocarpa]
Pbr027696.1	1641	330	15	38.0579	1.81829	-4.38754	Down	2.36704e-75	1.17744e-73	K15015|1|6e-11|67.4|cre:CHLREDRAFT_196429|solute carrier family 32 (vesicular inhibitory amino acid transporter);K13946|2|1e-09|63.2|ppp:PHYPADRAFT_148519|auxin influx carrier (AUX1 LAX family)	GO:0031224//intrinsic to membrane	-	-	gi|297744933|emb|CBI38472.3|/0/unnamed protein product [Vitis vinifera]
Pbr010825.1	2592	502	23	36.6529	1.76511	-4.37609	Down	1.15231e-113	8.74125e-112	K13416|1|4e-60|231|ath:AT4G33430|brassinosteroid insensitive 1-associated receptor kinase 1 [EC:2.7.10.1 2.7.11.1];K13417|2|6e-60|231|ath:AT2G13790|somatic embryogenesis receptor kinase 4 [EC:2.7.10.1 2.7.11.1];K13418|4|1e-59|230|aly:ARALYDRAFT_895025|somatic embryogenesis receptor kinase 1 [EC:2.7.10.1 2.7.11.1]	-	GO:0030246//carbohydrate binding;GO:0004674//protein serine/threonine kinase activity;GO:0032559	GO:0006464//cellular protein modification process;GO:0008037//cell recognition	gi|255545116|ref|XP_002513619.1|/0/ATP binding protein, putative [Ricinus communis]
Pbr033360.1	972	87	4	16.9392	0.818603	-4.37106	Down	9.32742e-21	1.50367e-19	K05283|1|2e-15|81.3|aly:ARALYDRAFT_354960|phosphatidylinositol glycan, class W [EC:2.3.-.-];K11982|2|1e-08|58.9|rcu:RCOM_1031870|E3 ubiquitin-protein ligase RNF115/126 [EC:6.3.2.19];K15692|5|6e-08|56.6|bdi:100845565|E3 ubiquitin-protein ligase RNF13 [EC:6.3.2.19]	-	-	-	gi|147799195|emb|CAN65773.1|/1.28021e-44/hypothetical protein VITISV_030410 [Vitis vinifera]
Pbr036833.1	1644	152	7	17.4977	0.846985	-4.36869	Down	2.42176e-35	6.11237e-34	K01058|1|4e-96|350|mtr:MTR_7g081620|phospholipase A1 [EC:3.1.1.32]	GO:0009536//plastid	GO:0004091//carboxylesterase activity	-	gi|147799455|emb|CAN77244.1|/0/hypothetical protein VITISV_035465 [Vitis vinifera]
Pbr013924.1	666	302	14	85.8167	4.18151	-4.35916	Down	8.47668e-69	3.79491e-67	K09286|1|1e-60|230|ath:AT4G25480|EREBP-like factor	GO:0043231//intracellular membrane-bounded organelle	GO:0003676//nucleic acid binding;GO:0001071//nucleic acid binding transcription factor activity	GO:0006351//transcription, DNA-dependent	gi|334108971|gb|AEG64738.1|/4.56442e-118/DREB protein [Pyrus pyrifolia]
Pbr037457.1	402	64	3	30.1296	1.48448	-4.34315	Down	1.63512e-15	2.08369e-14	-	GO:0044464//cell part	-	GO:0009725//response to hormone stimulus;GO:0006972//hyperosmotic response;GO:0009791//post-embryonic development;GO:0048229//gametophyte development;GO:0006914//autophagy	gi|357465013|ref|XP_003602788.1|/1.00553e-43/HVA22-like protein e [Medicago truncatula]
Pbr015624.1	1758	234	11	25.1905	1.24467	-4.33905	Down	1.82195e-53	6.67861e-52	K13422|1|1e-07|57.0|mtr:MTR_8g067280|transcription factor MYC2;K12126|2|1e-06|53.5|aly:ARALYDRAFT_471048|phytochrome-interacting factor 3	-	-	-	gi|225444893|ref|XP_002279486.1|/9.66427e-109/PREDICTED: putative transcription factor bHLH041 [Vitis vinifera]
Pbr026282.1	459	489	23	201.621	9.96769	-4.33824	Down	3.81244e-110	2.82152e-108	-	-	-	-	gi|224141345|ref|XP_002324034.1|/4.89744e-18/predicted protein [Populus trichocarpa]
Pbr036909.3	399	21	1	9.9606	0.498547	-4.32043	Down	9.60722e-06	5.27895e-05	K13448|1|6e-20|94.0|rcu:RCOM_1677910|calcium-binding protein CML	-	-	-	gi|356514009|ref|XP_003525700.1|/2.11436e-25/PREDICTED: probable calcium-binding protein CML31-like [Glycine max]
Pbr008753.1	1182	21	1	3.36233	0.168291	-4.32043	Down	9.60722e-06	5.27576e-05	K00924|1|5e-60|229|aly:ARALYDRAFT_486409|[EC:2.7.1.-];K04733|3|3e-58|224|ath:AT5G38990|interleukin-1 receptor-associated kinase 4 [EC:2.7.11.1]	-	GO:0046872//metal ion binding;GO:0004702//receptor signaling protein serine/threonine kinase activity;GO:0032559	GO:0006464//cellular protein modification process	gi|255558508|ref|XP_002520279.1|/2.54078e-157/ATP binding protein, putative [Ricinus communis]
Pbr039800.1	900	21	1	4.41587	0.221023	-4.32043	Down	9.60722e-06	5.27682e-05	K06911|1|2e-147|519|gmx:100790637|	-	-	-	gi|356552737|ref|XP_003544719.1|/2.30178e-146/PREDICTED: pirin-like protein-like [Glycine max]
Pbr003286.1	2199	21	1	1.80731	0.0904595	-4.32043	Down	9.60722e-06	5.27788e-05	K13420|1|8e-68|256|sbi:SORBI_06g028760|LRR receptor-like serine/threonine-protein kinase FLS2 [EC:2.7.11.1]	-	GO:0004872//receptor activity;GO:0005488//binding;GO:0016301//kinase activity	GO:0006950//response to stress;GO:0009987//cellular process;GO:0023052//signaling	gi|359482434|ref|XP_002270860.2|/5.94236e-175/PREDICTED: tyrosine-sulfated glycopeptide receptor 1-like [Vitis vinifera]
Pbr032757.1	1677	480	23	54.1686	2.72819	-4.31144	Down	1.03272e-107	7.48081e-106	K03327|1|0.0|670|pop:POPTR_903196|multidrug resistance protein, MATE family	GO:0044464//cell part	GO:0022857//transmembrane transporter activity	GO:0006810//transport	gi|224136866|ref|XP_002322435.1|/0/predicted protein [Populus trichocarpa]
Pbr000382.1	690	124	6	34.0104	1.72974	-4.29735	Down	8.99484e-29	1.91607e-27	-	-	-	-	gi|297740406|emb|CBI30588.3|/1.12414e-29/unnamed protein product [Vitis vinifera]
Pbr041948.1	726	61	3	15.9013	0.821985	-4.27389	Down	1.06143e-14	1.29694e-13	-	-	-	-	gi|302398683|gb|ADL36636.1|/6.61258e-100/C2H2L domain class transcription factor [Malus x domestica]
Pbr034988.1	486	81	4	31.5419	1.63721	-4.26796	Down	3.9279e-19	5.95266e-18	-	-	-	-	gi|399920209|gb|AFP55556.1|/9.59077e-58/TIR-NBS-LRR [Rosa rugosa]
Pbr026959.2	1200	681	34	107.4	5.63608	-4.25216	Down	8.9737e-151	8.84703e-149	K10703|1|1e-44|179|sbi:SORBI_09g022630|3-hydroxy acyl-CoA dehydratase [EC:4.2.1.-];K13464|2|1e-34|145|vvi:100262641|jasmonate ZIM domain-containing protein	-	-	-	gi|224054853|ref|XP_002298376.1|/1.79159e-57/predicted protein [Populus trichocarpa]
Pbr030520.1	498	20	1	7.60046	0.399439	-4.25004	Down	1.7968e-05	9.50576e-05	-	-	GO:0003824//catalytic activity	-	gi|225425306|ref|XP_002273187.1|/3.12834e-54/PREDICTED: nudix hydrolase 13, mitochondrial-like [Vitis vinifera]
Pbr035873.1	783	20	1	4.83401	0.254049	-4.25004	Down	1.7968e-05	9.50945e-05	K08081|1|5e-99|358|vvi:100258048|tropine dehydrogenase [EC:1.1.1.206]	-	GO:0016616//oxidoreductase activity, acting on the CH-OH group of donors, NAD or NADP as acceptor	GO:0008152//metabolic process	gi|359482090|ref|XP_002271363.2|/5.41586e-98/PREDICTED: tropinone reductase homolog isoform 1 [Vitis vinifera]
Pbr035872.1	783	40	2	9.66801	0.508098	-4.25004	Down	5.62774e-10	4.9259e-09	K08081|1|4e-99|358|vvi:100258048|tropine dehydrogenase [EC:1.1.1.206]	-	GO:0016616//oxidoreductase activity, acting on the CH-OH group of donors, NAD or NADP as acceptor	GO:0008152//metabolic process	gi|359482090|ref|XP_002271363.2|/4.14678e-98/PREDICTED: tropinone reductase homolog isoform 1 [Vitis vinifera]
Pbr028133.1	381	20	1	9.93446	0.522101	-4.25004	Down	1.7968e-05	9.50392e-05	-	-	GO:0005488//binding;GO:0003824//catalytic activity	-	gi|255544019|ref|XP_002513072.1|/1.07629e-13/Disease resistance protein RGA2, putative [Ricinus communis]
Pbr003841.1	1224	20	1	3.09234	0.162517	-4.25004	Down	1.7968e-05	9.50761e-05	K14497|1|1e-115|414|pop:POPTR_768154|protein phosphatase 2C [EC:3.1.3.16]	-	GO:0004721//phosphoprotein phosphatase activity	-	gi|224106389|ref|XP_002314150.1|/1.25637e-114/predicted protein [Populus trichocarpa]
Pbr000856.1	1704	20	1	2.22126	0.116737	-4.25004	Down	1.7968e-05	9.50208e-05	-	-	-	-	gi|255639566|gb|ACU20077.1|/3.59384e-44/unknown [Glycine max]
Pbr035244.1	450	2387	120	1003.87	53.0454	-4.2422	Down	0	0	-	-	-	-	gi|224141345|ref|XP_002324034.1|/2.93534e-25/predicted protein [Populus trichocarpa]
Pbr028935.1	1692	2180	112	243.835	13.1673	-4.21087	Down	0	0	K02183|1|5e-85|313|vvi:100264980|calmodulin	-	-	-	gi|224123924|ref|XP_002330243.1|/7.49046e-127/predicted protein [Populus trichocarpa]
Pbr011143.1	1437	819	43	107.861	5.95239	-4.17957	Down	6.80588e-179	7.80932e-177	K14963|1|1e-14|79.7|bdi:100832822|COMPASS component SWD3;K12662|2|4e-14|77.8|ota:Ot14g00400|U4/U6 small nuclear ribonucleoprotein PRP4	GO:0031461//cullin-RING ubiquitin ligase complex;GO:0031234//extrinsic to internal side of plasma membrane	-	-	gi|255545666|ref|XP_002513893.1|/0/WD-repeat protein, putative [Ricinus communis]
Pbr021468.1	705	38	2	10.2008	0.564313	-4.17604	Down	1.95089e-09	1.63326e-08	-	-	-	-	gi|255565337|ref|XP_002523660.1|/7.05328e-19/conserved hypothetical protein [Ricinus communis]
Pbr035874.1	783	57	3	13.7769	0.762147	-4.17604	Down	1.27252e-13	1.45647e-12	K08081|1|3e-98|355|vvi:100258048|tropine dehydrogenase [EC:1.1.1.206]	-	GO:0016616//oxidoreductase activity, acting on the CH-OH group of donors, NAD or NADP as acceptor	GO:0008152//metabolic process	gi|359482090|ref|XP_002271363.2|/3.51046e-97/PREDICTED: tropinone reductase homolog isoform 1 [Vitis vinifera]
Pbr042494.1	978	19	1	3.67666	0.203395	-4.17604	Down	3.35416e-05	0.000170861	K05283|1|6e-15|79.7|aly:ARALYDRAFT_354960|phosphatidylinositol glycan, class W [EC:2.3.-.-];K11982|2|3e-10|64.3|rcu:RCOM_1031870|E3 ubiquitin-protein ligase RNF115/126 [EC:6.3.2.19]	-	-	-	gi|147799195|emb|CAN65773.1|/4.74804e-47/hypothetical protein VITISV_030410 [Vitis vinifera]
Pbr014455.1	897	19	1	4.00867	0.221762	-4.17604	Down	3.35416e-05	0.000170925	-	-	-	-	gi|225452173|ref|XP_002270738.1|/2.1236e-59/PREDICTED: uncharacterized protein LOC100249110 [Vitis vinifera]
Pbr042694.1	1428	38	2	5.0361	0.2786	-4.17604	Down	1.95089e-09	1.63276e-08	K13420|1|1e-09|63.2|pop:POPTR_1075175|LRR receptor-like serine/threonine-protein kinase FLS2 [EC:2.7.11.1]	-	-	-	gi|332330343|gb|AEE43929.1|/1.32606e-73/TIR-NBS-LRR resistance protein muRdr1E [Rosa multiflora]
Pbr023827.1	1830	19	1	1.96491	0.1087	-4.17604	Down	3.35416e-05	0.000170893	K14297|1|7e-12|70.9|mtr:MTR_1g066430|nuclear pore complex protein Nup98-Nup96;K11982|2|5e-08|58.2|vvi:100262515|E3 ubiquitin-protein ligase RNF115/126 [EC:6.3.2.19]	-	GO:0046872//metal ion binding;GO:0019899//enzyme binding;GO:0019787//small conjugating protein ligase activity	GO:0045926//negative regulation of growth;GO:0016567//protein ubiquitination;GO:0003006//developmental process involved in reproduction	gi|255582236|ref|XP_002531910.1|/3.26662e-91/protein binding protein, putative [Ricinus communis]
Pbr019418.1	789	2506	134	601.095	33.7837	-4.15319	Down	0	0	K00522|1|3e-88|322|rcu:RCOM_0847660|ferritin heavy chain [EC:1.16.3.1]	GO:0009532//plastid stroma;GO:0009534//chloroplast thylakoid	GO:0016724;GO:0005506//iron ion binding	GO:0048827//phyllome development;GO:0051707//response to other organism;GO:0010038//response to metal ion;GO:0000302//response to reactive oxygen species;GO:0000041//transition metal ion transport;GO:0006875//cellular metal ion homeostasis;GO:0009791//post-embryonic development;GO:0044237//cellular metabolic process	gi|89276797|gb|ABD66597.1|/8.13275e-126/iron-binding protein [Pyrus pyrifolia]
Pbr022252.1	813	1669	91	388.512	22.2654	-4.12509	Down	0	0	K12135|1|1e-09|62.0|aly:ARALYDRAFT_488429|zinc finger protein CONSTANS	-	GO:0046914//transition metal ion binding;GO:0001071//nucleic acid binding transcription factor activity	GO:0006351//transcription, DNA-dependent;GO:0009411//response to UV	gi|302398747|gb|ADL36668.1|/1.4139e-96/COL domain class transcription factor [Malus x domestica]
Pbr016202.1	1524	110	6	13.6599	0.783151	-4.12451	Down	5.25998e-25	9.87249e-24	K08472|1|4e-113|406|aly:ARALYDRAFT_903160|mlo protein	-	-	-	gi|359483893|ref|XP_002273434.2|/1.95118e-171/PREDICTED: MLO-like protein 6-like [Vitis vinifera]
Pbr027738.1	2163	110	6	9.62444	0.55179	-4.12451	Down	5.25998e-25	9.87928e-24	-	GO:0016020//membrane	-	-	gi|225444686|ref|XP_002277641.1|/0/PREDICTED: inter-alpha-trypsin inhibitor heavy chain H3 [Vitis vinifera]
Pbr014743.1	672	91	5	25.6278	1.48006	-4.11398	Down	7.3037e-21	1.18724e-19	-	-	-	-	gi|359807538|ref|NP_001240894.1|/4.96254e-11/uncharacterized protein LOC100793725 [Glycine max]
Pbr009538.1	1122	451	25	76.0716	4.43227	-4.10124	Down	6.1079e-98	4.00002e-96	K01090|1|6e-97|352|sbi:SORBI_01g038410|protein phosphatase [EC:3.1.3.16];K14497|2|1e-38|159|zma:100381666|protein phosphatase 2C [EC:3.1.3.16]	-	GO:0016787//hydrolase activity	-	gi|359486495|ref|XP_002272594.2|/2.09604e-121/PREDICTED: probable protein phosphatase 2C 25-like [Vitis vinifera]
Pbr025090.1	276	18	1	12.3425	0.720726	-4.09804	Down	6.24844e-05	0.000304549	-	-	-	-	gi|147852199|emb|CAN80145.1|/2.59809e-23/hypothetical protein VITISV_015720 [Vitis vinifera]
Pbr018768.1	519	36	2	13.1273	0.766553	-4.09804	Down	6.7317e-09	5.35497e-08	-	-	-	-	gi|224103781|ref|XP_002313191.1|/7.56898e-17/predicted protein [Populus trichocarpa]
Pbr004960.1	195	54	3	52.4081	3.06031	-4.09804	Down	8.13054e-13	8.825e-12	-	-	-	-	-
Pbr024999.1	471	54	3	21.6976	1.26701	-4.09804	Down	8.13054e-13	8.82851e-12	K13993|1|7e-60|227|pop:POPTR_832078|HSP20 family protein	-	-	-	gi|5257560|gb|AAD41409.1|AF159562_1/8.52945e-61/cytosolic class II low molecular weight heat shock protein [Prunus dulcis]
Pbr038245.1	2619	18	1	1.3007	0.0759528	-4.09804	Down	6.24844e-05	0.000304494	K05387|1|5e-122|437|osa:4347123|glutamate receptor, ionotropic, other eukaryote	GO:0044464//cell part	GO:0005215//transporter activity	-	gi|225461599|ref|XP_002282936.1|/0/PREDICTED: glutamate receptor 2.7-like [Vitis vinifera]
Pbr033315.1	885	858	48	183.478	10.7889	-4.08798	Down	1.85089e-184	2.20725e-182	-	-	GO:0003676//nucleic acid binding;GO:0001071//nucleic acid binding transcription factor activity	GO:0009887//organ morphogenesis;GO:0008361//regulation of cell size;GO:0003006//developmental process involved in reproduction;GO:0009743//response to carbohydrate stimulus	gi|225428195|ref|XP_002281816.1|/4.55949e-107/PREDICTED: putative NAC domain-containing protein 94 [Vitis vinifera]
Pbr032773.1	1107	53	3	9.06082	0.53908	-4.07107	Down	1.50609e-12	1.606e-11	K00008|1|3e-171|599|mtr:MTR_054s0019|L-iditol 2-dehydrogenase [EC:1.1.1.14]	-	GO:0016616//oxidoreductase activity, acting on the CH-OH group of donors, NAD or NADP as acceptor;GO:0046914//transition metal ion binding	GO:0008152//metabolic process	gi|57116679|gb|AAW33814.1|/0/sorbitol dehydrogenase [Malus x domestica]
Pbr028230.1	645	106	6	31.1018	1.85042	-4.07107	Down	6.17478e-24	1.12794e-22	-	-	-	-	gi|255571437|ref|XP_002526666.1|/5.26662e-07/conserved hypothetical protein [Ricinus communis]
Pbr029361.1	639	1024	58	303.276	18.0554	-4.07013	Down	3.90472e-219	5.89138e-217	-	-	-	-	gi|24461857|gb|AAN62344.1|AF506028_11/2.80417e-37/CTV.15 [Citrus trifoliata]
Pbr009090.1	576	386	22	126.825	7.59765	-4.06114	Down	1.81151e-83	1.01374e-81	-	-	-	-	gi|147810457|emb|CAN69808.1|/2.27899e-66/hypothetical protein VITISV_019656 [Vitis vinifera]
Pbr027280.1	2790	263	15	17.8398	1.06946	-4.06014	Down	2.50038e-57	9.6718e-56	K13457|1|2e-22|106|vvi:100252764|disease resistance protein RPM1;K03013|3|4e-21|102|vvi:100258335|DNA-directed RNA polymerases I, II, and III subunit RPABC1;K13459|5|6e-18|91.7|rcu:RCOM_1047690|disease resistance protein RPS2	-	-	-	gi|332330340|gb|AEE43926.1|/0/TIR-NBS-LRR resistance protein muRdr1B [Rosa multiflora]
Pbr028331.1	1458	296	17	38.4214	2.31937	-4.0501	Down	3.13998e-64	1.32126e-62	-	GO:0043231//intracellular membrane-bounded organelle	GO:0003824//catalytic activity	-	gi|225462886|ref|XP_002263219.1|/3.86863e-137/PREDICTED: monoglyceride lipase [Vitis vinifera]
Pbr034872.1	2058	502	29	46.1634	2.80306	-4.04168	Down	1.01048e-107	7.33918e-106	K14431|1|3e-16|85.5|aly:ARALYDRAFT_311885|transcription factor TGA;K08332|2|5e-12|71.6|vcn:VOLCADRAFT_41528|vacuolar protein 8	-	GO:0005488//binding;GO:0019787//small conjugating protein ligase activity	GO:0032446//protein modification by small protein conjugation	gi|359473439|ref|XP_002264637.2|/0/PREDICTED: U-box domain-containing protein 19-like [Vitis vinifera]
Pbr014871.1	366	120	7	62.0496	3.80449	-4.02765	Down	9.72162e-27	1.95932e-25	-	-	-	-	gi|388521421|gb|AFK48772.1|/1.33997e-11/unknown [Medicago truncatula]
Pbr035434.1	1446	17	1	2.22495	0.137566	-4.01558	Down	0.000116139	0.00053775	-	GO:0044464//cell part	GO:0004091//carboxylesterase activity	GO:0044238//primary metabolic process	gi|118485815|gb|ABK94755.1|/3.23115e-168/unknown [Populus trichocarpa]
Pbr005279.1	1449	17	1	2.22034	0.137281	-4.01558	Down	0.000116139	0.000537933	K15086|1|5e-178|622|rcu:RCOM_0906740|(3S)-linalool synthase [EC:4.2.3.25]	-	-	-	gi|332319699|sp|P0CV94.1|NES1_FRAAN/0/RecName: Full=(3S,6E)-nerolidol synthase 1; Short=FaNES1
Pbr037291.1	2793	17	1	1.15191	0.0712211	-4.01558	Down	0.000116139	0.000537841	K08286|1|4e-88|324|ath:AT4G28490|protein-serine/threonine kinase [EC:2.7.11.-];K00924|2|1e-86|320|ath:AT5G25930|[EC:2.7.1.-];K13415|3|1e-86|319|sbi:SORBI_03g012040|protein brassinosteroid insensitive 1 [EC:2.7.10.1 2.7.11.1]	-	GO:0016740//transferase activity	-	gi|224132304|ref|XP_002321306.1|/2.96767e-174/predicted protein [Populus trichocarpa]
Pbr015939.1	1563	5871	349	710.873	44.4167	-4.00042	Down	0	0	K13424|1|7e-135|479|pop:POPTR_577093|WRKY transcription factor 33	-	-	-	gi|302399143|gb|ADL36866.1|/0/WRKY domain class transcription factor [Malus x domestica]
Pbr038324.1	1068	166	10	29.4155	1.86255	-3.98122	Down	3.38074e-36	8.72634e-35	-	-	-	-	gi|147803537|emb|CAN77669.1|/1.46229e-68/hypothetical protein VITISV_038107 [Vitis vinifera]
Pbr039599.1	345	116	7	63.6324	4.03607	-3.97874	Down	1.12498e-25	2.16048e-24	-	-	-	-	gi|356512310|ref|XP_003524863.1|/2.04351e-20/PREDICTED: protein TIFY 5A-like [Glycine max]
Pbr003672.1	321	33	2	19.4558	1.23938	-3.97251	Down	4.273e-08	3.13686e-07	-	-	-	-	-
Pbr027022.1	2034	673	41	62.6186	4.0097	-3.96502	Down	6.92366e-142	6.49753e-140	K04733|1|2e-60|232|smo:SELMODRAFT_230241|interleukin-1 receptor-associated kinase 4 [EC:2.7.11.1];K13430|5|8e-52|203|zma:100283091|serine/threonine-protein kinase PBS1 [EC:2.7.11.1]	GO:0016020//membrane	GO:0005488//binding;GO:0004672//protein kinase activity	-	gi|356573847|ref|XP_003555067.1|/0/PREDICTED: cysteine-rich receptor-like protein kinase 42-like [Glycine max]
Pbr031672.1	537	948	58	334.097	21.4849	-3.95887	Down	5.96058e-199	7.7884e-197	-	-	-	-	gi|351723595|ref|NP_001238308.1|/2.0679e-44/uncharacterized protein LOC100527075 [Glycine max]
Pbr031668.1	537	163	10	57.445	3.70429	-3.95491	Down	2.11032e-35	5.33124e-34	-	GO:0044464//cell part	GO:0008289//lipid binding	GO:0006952//defense response;GO:0009987//cellular process;GO:0010033//response to organic substance;GO:0009628//response to abiotic stimulus	gi|356520454|ref|XP_003528877.1|/3.19032e-45/PREDICTED: BON1-associated protein 2-like [Glycine max]
Pbr035713.1	1221	145	9	22.4746	1.46624	-3.9381	Down	1.52041e-31	3.49796e-30	K09561|1|7e-06|50.1|vcn:VOLCADRAFT_67840|STIP1 homology and U-box containing protein 1 [EC:6.3.2.19]	GO:0043234//protein complex;GO:0044444//cytoplasmic part	GO:0019787//small conjugating protein ligase activity	GO:0006950//response to stress;GO:0016567//protein ubiquitination;GO:0002252	gi|225439452|ref|XP_002267438.1|/7.50757e-152/PREDICTED: E3 ubiquitin-protein ligase PUB23-like [Vitis vinifera]
Pbr039194.1	1287	1012	63	148.813	9.73736	-3.93383	Down	2.87814e-211	4.15868e-209	K14664|1|3e-178|622|vvi:100262106|IAA-amino acid hydrolase [EC:3.5.1.-]	-	GO:0016811//hydrolase activity, acting on carbon-nitrogen (but not peptide) bonds, in linear amides	-	gi|225424779|ref|XP_002269424.1|/3.26388e-177/PREDICTED: IAA-amino acid hydrolase ILR1-like 4-like [Vitis vinifera]
Pbr024499.1	387	80	5	39.1217	2.57003	-3.92811	Down	6.21514e-18	8.98514e-17	-	-	GO:0046872//metal ion binding	GO:0000904//cell morphogenesis involved in differentiation	gi|358248524|ref|NP_001239896.1|/4.59887e-44/uncharacterized protein LOC100801586 [Glycine max]
Pbr004621.1	2517	6263	393	470.91	31.0591	-3.92237	Down	0	0	K03013|1|1e-18|93.6|vvi:100258335|DNA-directed RNA polymerases I, II, and III subunit RPABC1;K13457|3|6e-17|88.2|aly:ARALYDRAFT_478023|disease resistance protein RPM1	-	-	-	gi|359480461|ref|XP_002268207.2|/0/PREDICTED: probable disease resistance protein At5g66900-like [Vitis vinifera]
Pbr013257.1	762	2129	134	528.761	34.9808	-3.91798	Down	0	0	K10525|1|2e-87|320|pop:POPTR_873764|allene oxide cyclase [EC:5.3.99.6]	GO:0009536//plastid	GO:0009975//cyclase activity	-	gi|359488393|ref|XP_003633753.1|/3.34268e-89/PREDICTED: allene oxide cyclase 4, chloroplastic [Vitis vinifera]
Pbr000280.1	627	487	31	146.994	9.83498	-3.90169	Down	6.75144e-102	4.60938e-100	-	-	-	-	gi|359495468|ref|XP_003634996.1|/2.35314e-33/PREDICTED: F-box protein SKIP27-like [Vitis vinifera]
Pbr009332.1	2454	314	20	24.2155	1.62119	-3.90081	Down	3.13392e-66	1.36281e-64	K13457|1|3e-17|89.0|osa:4342596|disease resistance protein RPM1;K13460|2|1e-16|87.4|ath:AT1G12220|disease resistance protein RPS5;K03013|4|1e-15|83.6|vvi:100258335|DNA-directed RNA polymerases I, II, and III subunit RPABC1	-	-	-	gi|359480461|ref|XP_002268207.2|/0/PREDICTED: probable disease resistance protein At5g66900-like [Vitis vinifera]
Pbr002792.1	1482	565	36	72.1505	4.83207	-3.90029	Down	6.24714e-118	4.97385e-116	K00924|1|6e-08|57.4|aly:ARALYDRAFT_489138|[EC:2.7.1.-]	GO:0005618//cell wall	GO:0016787//hydrolase activity	-	gi|357482031|ref|XP_003611301.1|/1.87929e-171/Aspartic proteinase nepenthesin-2 [Medicago truncatula]
Pbr040364.1	2850	311	20	20.6516	1.39593	-3.88696	Down	1.93626e-65	8.31406e-64	K13457|1|1e-165|582|vvi:100252764|disease resistance protein RPM1	-	GO:0032559	GO:0012501//programmed cell death;GO:0006950//response to stress	gi|224138292|ref|XP_002326566.1|/0/nbs-lrr resistance protein [Populus trichocarpa]
Pbr001718.1	1623	31	2	3.61478	0.245127	-3.88231	Down	1.45418e-07	1.00895e-06	K13508|1|0.0|642|pop:POPTR_755676|glycerol-3-phosphate acyltransferase [EC:2.3.1.15]	-	GO:0008374//O-acyltransferase activity	-	gi|224064623|ref|XP_002301527.1|/0/predicted protein [Populus trichocarpa]
Pbr010524.1	1290	31	2	4.5479	0.308404	-3.88231	Down	1.45418e-07	1.00869e-06	K06685|1|7e-08|57.0|aly:ARALYDRAFT_492950|maintenance of ploidy protein MOB1 (MPS1 binder 1)	-	-	-	gi|399920226|gb|AFP55573.1|/4.55073e-78/retrotransposon protein [Rosa rugosa]
Pbr040617.1	945	852	55	170.627	11.5774	-3.88146	Down	2.36812e-176	2.66136e-174	-	-	-	-	gi|224152016|ref|XP_002337181.1|/5.40013e-133/predicted protein [Populus trichocarpa]
Pbr040480.2	603	976	64	306.317	21.1126	-3.85885	Down	7.1275e-201	9.35793e-199	-	-	-	-	gi|382948201|gb|AFG33215.1|/1.07738e-48/dehydrin 5 [Malus x domestica]
Pbr030796.1	468	91	6	36.7989	2.55026	-3.85094	Down	5.8856e-20	9.18981e-19	-	-	GO:0005488//binding	GO:0050896//response to stimulus	gi|13172242|gb|AAK14060.1|AF239177_1/3.85412e-74/major latex-like protein [Prunus persica]
Pbr030105.1	2127	268	18	23.8455	1.68339	-3.82428	Down	6.50368e-56	2.46337e-54	K00901|1|0.0|1142|rcu:RCOM_1470420|diacylglycerol kinase [EC:2.7.1.107]	-	GO:0046872//metal ion binding;GO:0016301//kinase activity	GO:0007186//G-protein coupled receptor signaling pathway;GO:0006796//phosphate-containing compound metabolic process	gi|255547253|ref|XP_002514684.1|/0/diacylglycerol kinase, theta, putative [Ricinus communis]
Pbr034761.1	1335	386	26	54.7199	3.87411	-3.82013	Down	8.27438e-80	4.37917e-78	K09286|1|9e-48|189|ath:AT4G28140|EREBP-like factor	-	-	-	gi|386646588|gb|AFJ14638.1|/1.53118e-177/dehydration-responsive element-binding protein (DREB6), partial [Malus x domestica]
Pbr019996.1	792	162	11	38.7105	2.76278	-3.80853	Down	3.01506e-34	7.41786e-33	K01850|1|5e-65|245|ath:AT5G10870|chorismate mutase [EC:5.4.99.5]	-	-	GO:0008652//cellular amino acid biosynthetic process	gi|15238285|ref|NP_196648.1|/5.22597e-64/chorismate mutase 2 [Arabidopsis thaliana]
Pbr013022.1	1149	1580	108	260.241	18.6975	-3.79893	Down	0	0	K01090|1|5e-87|319|sbi:SORBI_01g038410|protein phosphatase [EC:3.1.3.16];K14497|2|2e-39|161|zma:100381666|protein phosphatase 2C [EC:3.1.3.16]	GO:0043234//protein complex	GO:0004721//phosphoprotein phosphatase activity;GO:0043169//cation binding	GO:0006464//cellular protein modification process	gi|225434544|ref|XP_002276936.1|/7.97502e-124/PREDICTED: probable protein phosphatase 2C 25 isoform 1 [Vitis vinifera]
Pbr030285.1	321	146	10	86.077	6.1969	-3.79601	Down	6.37404e-31	1.44816e-29	-	-	-	-	-
Pbr038818.1	1335	101	7	14.3179	1.04303	-3.77897	Down	1.0185e-21	1.71375e-20	K09561|1|1e-06|53.1|zma:100273449|STIP1 homology and U-box containing protein 1 [EC:6.3.2.19];K10597|5|8e-06|50.1|ota:Ot17g01860|ubiquitin conjugation factor E4 B [EC:6.3.2.19]	-	GO:0016874//ligase activity	-	gi|224120352|ref|XP_002318308.1|/6.06322e-150/predicted protein [Populus trichocarpa]
Pbr004377.1	1371	72	5	9.9388	0.725457	-3.77611	Down	7.97876e-16	1.03709e-14	K13065|1|4e-13|74.3|zma:100279386|shikimate O-hydroxycinnamoyltransferase [EC:2.3.1.133]	-	GO:0016740//transferase activity	-	gi|225451306|ref|XP_002273086.1|/1.90328e-130/PREDICTED: hydroxycinnamoyl-Coenzyme A shikimate/quinate hydroxycinnamoyltransferase [Vitis vinifera]
Pbr030208.1	507	201	14	75.0287	5.49287	-3.77181	Down	7.43276e-42	2.1873e-40	K09286|1|1e-22|103|aly:ARALYDRAFT_897795|EREBP-like factor	-	-	GO:0006351//transcription, DNA-dependent	gi|292668897|gb|ADE41103.1|/7.40556e-38/AP2 domain class transcription factor [Malus x domestica]
Pbr020962.2	546	754	53	261.347	19.3091	-3.75861	Down	1.9654e-152	1.95887e-150	-	-	-	GO:0009743//response to carbohydrate stimulus	gi|351726914|ref|NP_001235351.1|/5.8996e-42/uncharacterized protein LOC100526874 [Glycine max]
Pbr009798.1	1632	311	22	36.0645	2.68153	-3.74945	Down	1.11601e-63	4.64589e-62	K01058|1|3e-95|347|aly:ARALYDRAFT_322142|phospholipase A1 [EC:3.1.1.32]	GO:0009536//plastid	GO:0004091//carboxylesterase activity	GO:0044238//primary metabolic process	gi|147799455|emb|CAN77244.1|/0/hypothetical protein VITISV_035465 [Vitis vinifera]
Pbr008729.1	1224	98	7	15.1525	1.13762	-3.73547	Down	6.20384e-21	1.01026e-19	-	-	GO:0003824//catalytic activity	GO:0044238//primary metabolic process	gi|225458561|ref|XP_002282546.1|/2.32586e-177/PREDICTED: patatin-T5-like [Vitis vinifera]
Pbr027276.1	1476	42	3	5.3852	0.40431	-3.73547	Down	1.23872e-09	1.05252e-08	K06685|1|1e-13|76.3|ath:AT4G19050|maintenance of ploidy protein MOB1 (MPS1 binder 1)	-	-	-	gi|332330342|gb|AEE43928.1|/5.37825e-94/TIR-NBS-LRR resistance protein muRdr1D [Rosa multiflora]
Pbr006803.1	1230	4077	294	627.299	47.5468	-3.72173	Down	0	0	K13496|1|5e-07|53.9|ath:AT2G36780|UDP-glucosyl transferase 73C [EC:2.4.1.-];K13495|2|9e-07|53.1|osa:4344177|cis-zeatin O-glucosyltransferase [EC:2.4.1.215]	-	GO:0016758//transferase activity, transferring hexosyl groups	-	gi|224071441|ref|XP_002303461.1|/6.19614e-45/predicted protein [Populus trichocarpa]
Pbr020909.1	2829	305	22	20.4036	1.54692	-3.72135	Down	4.08756e-62	1.67357e-60	K13420|1|7e-85|313|aly:ARALYDRAFT_356368|LRR receptor-like serine/threonine-protein kinase FLS2 [EC:2.7.11.1]	-	-	-	gi|209970622|gb|ACJ03072.1|/0/HB06p [Malus floribunda]
Pbr033550.1	939	233	17	46.9601	3.60133	-3.70484	Down	1.24035e-47	4.12076e-46	-	-	-	-	gi|225459247|ref|XP_002285762.1|/6.97932e-133/PREDICTED: uncharacterized protein LOC100259041 [Vitis vinifera]
Pbr008138.1	2007	41	3	3.86612	0.29734	-3.7007	Down	2.26342e-09	1.88278e-08	K13420|1|3e-52|204|pop:POPTR_1075175|LRR receptor-like serine/threonine-protein kinase FLS2 [EC:2.7.11.1]	-	GO:0004872//receptor activity;GO:0003824//catalytic activity	GO:0050896//response to stimulus	gi|147832546|emb|CAN68301.1|/4.41179e-145/hypothetical protein VITISV_009907 [Vitis vinifera]
Pbr032528.1	1032	41	3	7.51871	0.578257	-3.7007	Down	2.26342e-09	1.88221e-08	K09422|1|3e-113|406|vvi:100257755|myb proto-oncogene protein, plant	-	-	-	gi|302398933|gb|ADL36761.1|/1.89345e-174/MYB domain class transcription factor [Malus x domestica]
Pbr026632.3	1155	246	18	40.3081	3.10006	-3.7007	Down	3.63162e-50	1.26018e-48	K07297|1|2e-82|304|gmx:100792813|adiponectin receptor	-	-	GO:0034285;GO:0009719	gi|356500693|ref|XP_003519166.1|/1.69533e-81/PREDICTED: adiponectin receptor protein 1-like [Glycine max]
Pbr028227.1	315	272	20	163.417	12.6299	-3.69365	Down	3.12534e-55	1.17239e-53	-	-	-	-	gi|357506139|ref|XP_003623358.1|/4.25969e-18/hypothetical protein MTR_7g069970 [Medicago truncatula]
Pbr000223.1	1611	1351	100	158.708	12.3476	-3.68407	Down	2.00804e-267	3.68037e-265	K15086|1|6e-144|509|rcu:RCOM_0906740|(3S)-linalool synthase [EC:4.2.3.25]	-	-	-	gi|313755440|gb|ADR74211.1|/4.38911e-161/(3S)-linalool/(E)-nerolidol synthase [Vitis vinifera]
Pbr036385.2	3378	81	6	4.538	0.353322	-3.683	Down	2.44694e-17	3.43036e-16	K01099|1|9e-19|94.7|ota:Ot04g02290|phosphatidylinositol-bisphosphatase [EC:3.1.3.36]	GO:0043231//intracellular membrane-bounded organelle;GO:0031461//cullin-RING ubiquitin ligase complex	GO:0046030//inositol trisphosphate phosphatase activity;GO:0004518//nuclease activity	GO:0009888//tissue development;GO:0009725//response to hormone stimulus;GO:0009416//response to light stimulus;GO:0031667//response to nutrient levels;GO:0009756//carbohydrate mediated signaling;GO:0048878//chemical homeostasis;GO:0048513//organ development;GO:0006950//response to stress	gi|225434215|ref|XP_002275762.1|/0/PREDICTED: type I inositol-1,4,5-trisphosphate 5-phosphatase 12 [Vitis vinifera]
Pbr023540.3	3048	1036	77	64.3256	5.02522	-3.67813	Down	3.21008e-205	4.3832e-203	K01537|1|0.0|1691|vvi:100247373|Ca2+-transporting ATPase [EC:3.6.3.8]	GO:0009532//plastid stroma;GO:0031224//intrinsic to membrane;GO:0009528//plastid inner membrane	GO:0046914//transition metal ion binding;GO:0005515//protein binding;GO:0019829//cation-transporting ATPase activity;GO:0046873//metal ion transmembrane transporter activity;GO:0005261//cation channel activity;GO:0032559;GO:0016836//hydro-lyase activity	GO:0006816//calcium ion transport;GO:0010035//response to inorganic substance;GO:0009206	gi|225438996|ref|XP_002284429.1|/0/PREDICTED: calcium-transporting ATPase 2, plasma membrane-type isoform 1 [Vitis vinifera]
Pbr032774.1	1107	188	14	32.1403	2.51571	-3.67535	Down	1.81248e-38	4.9349e-37	K00008|1|3e-171|599|mtr:MTR_054s0019|L-iditol 2-dehydrogenase [EC:1.1.1.14]	-	GO:0016616//oxidoreductase activity, acting on the CH-OH group of donors, NAD or NADP as acceptor;GO:0046914//transition metal ion binding	GO:0008152//metabolic process	gi|57116679|gb|AAW33814.1|/0/sorbitol dehydrogenase [Malus x domestica]
Pbr014424.1	1530	322	24	39.8294	3.12032	-3.67407	Down	7.74174e-65	3.30342e-63	K13407|1|8e-115|412|vvi:100259592|cytochrome P450, family 94, subfamily A, polypeptide 1 (fatty acid omega-hydroxylase) [EC:1.14.-.-];K00517|3|1e-105|382|aly:ARALYDRAFT_324175|[EC:1.14.-.-]	-	GO:0016712//oxidoreductase activity, acting on paired donors, with incorporation or reduction of molecular oxygen, reduced flavin or flavoprotein as one donor, and incorporation of one atom of oxygen;GO:0005506//iron ion binding	GO:0008152//metabolic process	gi|224060245|ref|XP_002300103.1|/0/cytochrome P450 [Populus trichocarpa]
Pbr028191.1	759	2318	176	577.977	46.1265	-3.64735	Down	0	0	K09873|1|3e-116|415|ath:AT4G01470|aquaporin TIP	GO:0031224//intrinsic to membrane	GO:0005372//water transmembrane transporter activity;GO:0042887	GO:0015840//urea transport;GO:0042044//fluid transport	gi|224112847|ref|XP_002316308.1|/5.60662e-121/aquaporin, MIP family, TIP subfamily [Populus trichocarpa]
Pbr037286.1	2364	39	3	3.12217	0.252437	-3.62855	Down	7.52328e-09	5.95862e-08	K08286|1|5e-80|297|ath:AT4G28490|protein-serine/threonine kinase [EC:2.7.11.-]	-	GO:0016301//kinase activity	-	gi|224070110|ref|XP_002303116.1|/1.64726e-162/predicted protein [Populus trichocarpa]
Pbr041117.1	1743	26	2	2.82303	0.228251	-3.62855	Down	3.01176e-06	1.77872e-05	K00423|1|2e-169|593|vvi:100251280|L-ascorbate oxidase [EC:1.10.3.3]	-	GO:0046914//transition metal ion binding;GO:0016682//oxidoreductase activity, acting on diphenols and related substances as donors, oxygen as acceptor	GO:0008152//metabolic process	gi|224109064|ref|XP_002315068.1|/0/predicted protein [Populus trichocarpa]
Pbr038280.1	642	1509	117	444.829	36.2519	-3.61712	Down	4.92684e-294	1.07638e-291	K09286|1|3e-21|99.8|ath:AT3G15210|EREBP-like factor	GO:0044451//nucleoplasm part	GO:0005488//binding;GO:0001071//nucleic acid binding transcription factor activity	GO:0009743//response to carbohydrate stimulus;GO:0002218//activation of innate immune response;GO:0006351//transcription, DNA-dependent;GO:0009873//ethylene mediated signaling pathway	gi|292668991|gb|ADE41150.1|/2.72562e-56/AP2 domain class transcription factor [Malus x domestica]
Pbr012922.1	666	128	10	36.3726	2.98679	-3.60618	Down	3.08644e-26	6.09455e-25	K06890|1|2e-99|359|vvi:100853005|	GO:0031224//intrinsic to membrane	GO:0016597//amino acid binding	GO:0000902//cell morphogenesis;GO:0043401//steroid hormone mediated signaling pathway	gi|296085243|emb|CBI28738.3|/1.80325e-98/unnamed protein product [Vitis vinifera]
Pbr011401.1	1638	114	9	13.1713	1.09297	-3.59108	Down	1.95904e-23	3.52899e-22	K10615|1|5e-09|61.2|cme:CMB070C|E3 ubiquitin-protein ligase HERC4 [EC:6.3.2.19];K11493|3|3e-07|55.5|ota:Ot03g05690|regulator of chromosome condensation	-	-	-	gi|255566472|ref|XP_002524221.1|/0/Serine/threonine-protein kinase Nek8, putative [Ricinus communis]
Pbr020813.1	228	467	37	387.633	32.2809	-3.58594	Down	1.62093e-91	9.8588e-90	-	-	-	-	gi|372477816|gb|AEX97102.1|/1.03567e-16/metallothionein protein, partial [Malus x domestica]
Pbr013975.1	2271	4146	330	345.503	28.9052	-3.57929	Down	0	0	-	-	-	GO:0050896//response to stimulus	gi|27529824|dbj|BAC53927.1|/8.37547e-47/hypothetical protein [Nicotiana tabacum]
Pbr015751.1	1161	25	2	4.07518	0.342671	-3.57197	Down	5.48694e-06	3.11913e-05	K01087|1|1e-173|607|rcu:RCOM_1500340|trehalose 6-phosphate phosphatase [EC:3.1.3.12]	-	GO:0019203//carbohydrate phosphatase activity	GO:0005991//trehalose metabolic process	gi|255539761|ref|XP_002510945.1|/1.60927e-172/trehalose-6-phosphate synthase, putative [Ricinus communis]
Pbr017006.1	510	25	2	9.27703	0.78008	-3.57197	Down	5.48694e-06	3.11848e-05	-	-	-	GO:0050896//response to stimulus	gi|237770135|gb|ACR19031.1|/2.59318e-75/TIR-NBS-LRR-type disease resistance-like protein [Pyrus x bretschneideri]
Pbr022666.1	723	137	11	35.8609	3.02645	-3.56671	Down	9.5212e-28	1.97579e-26	-	-	-	-	gi|225437501|ref|XP_002274824.1|/3.44732e-16/PREDICTED: uncharacterized protein LOC100245192 [Vitis vinifera]
Pbr041494.1	1377	3584	288	492.576	41.6043	-3.56554	Down	0	0	K14861|1|8e-20|96.7|gmx:100777901|nucleolar pre-ribosomal-associated protein 1	GO:0031090//organelle membrane;GO:0009536//plastid	GO:0016787//hydrolase activity	-	gi|255546077|ref|XP_002514098.1|/7.42573e-175/conserved hypothetical protein [Ricinus communis]
Pbr038443.1	588	149	12	47.9566	4.0596	-3.56232	Down	4.96192e-30	1.0919e-28	K13448|1|1e-18|90.9|aly:ARALYDRAFT_887792|calcium-binding protein CML	-	GO:0005488//binding	-	gi|224141003|ref|XP_002323865.1|/1.61767e-46/predicted protein [Populus trichocarpa]
Pbr016309.2	2637	359	29	25.7646	2.1876	-3.55797	Down	2.91614e-70	1.34978e-68	K11446|1|5e-61|234|ota:Ot08g01100|histone demethylase JARID1 [EC:1.14.11.-]	-	-	GO:0006351//transcription, DNA-dependent;GO:0009743//response to carbohydrate stimulus	gi|225427118|ref|XP_002276932.1|/0/PREDICTED: uncharacterized protein LOC100266131 [Vitis vinifera]
Pbr031670.1	402	395	32	185.956	15.8345	-3.55382	Down	4.45938e-77	2.27204e-75	-	-	-	-	gi|351723595|ref|NP_001238308.1|/1.90075e-34/uncharacterized protein LOC100527075 [Glycine max]
Pbr001716.1	2034	243	20	22.6097	1.95595	-3.531	Down	9.58076e-48	3.18686e-46	K01897|1|0.0|1014|gmx:100818394|long-chain acyl-CoA synthetase [EC:6.2.1.3]	GO:0043231//intracellular membrane-bounded organelle	GO:0015645//fatty acid ligase activity	GO:0006633//fatty acid biosynthetic process	gi|356572815|ref|XP_003554561.1|/0/PREDICTED: long chain acyl-CoA synthetase 1-like [Glycine max]
Pbr008727.1	1248	204	17	30.9353	2.70965	-3.51308	Down	3.8004e-40	1.07438e-38	-	-	GO:0003824//catalytic activity	GO:0044238//primary metabolic process	gi|62766606|gb|AAX99411.1|/1.72208e-159/patatin-like protein [Gossypium hirsutum]
Pbr024039.1	1554	24	2	2.9228	0.256011	-3.51308	Down	9.97198e-06	5.46179e-05	K00517|1|1e-103|375|ath:AT5G25130|[EC:1.14.-.-]	GO:0016020//membrane	GO:0046872//metal ion binding;GO:0016491//oxidoreductase activity	-	gi|357461739|ref|XP_003601151.1|/1.89177e-137/Cytochrome P450 [Medicago truncatula]
Pbr037634.1	1050	48	4	8.65149	0.757792	-3.51308	Down	2.13816e-10	1.9399e-09	K08286|1|7e-12|69.7|ath:AT4G28490|protein-serine/threonine kinase [EC:2.7.11.-];K13420|2|8e-11|66.2|osa:4337016|LRR receptor-like serine/threonine-protein kinase FLS2 [EC:2.7.11.1]	-	GO:0016791//phosphatase activity	-	gi|283132365|dbj|BAI63588.1|/1.83751e-140/leucine rich repeat protein [Lotus japonicus]
Pbr019883.1	486	180	15	70.0931	6.13952	-3.51308	Down	1.36987e-35	3.47998e-34	K13424|1|6e-22|101|pop:POPTR_663578|WRKY transcription factor 33	-	GO:0003677//DNA binding;GO:0001071//nucleic acid binding transcription factor activity	GO:0006351//transcription, DNA-dependent;GO:0006952//defense response;GO:0007165//signal transduction	gi|255550107|ref|XP_002516104.1|/6.04922e-36/WRKY transcription factor, putative [Ricinus communis]
Pbr037295.1	1047	107	9	19.3409	1.70992	-3.49965	Down	1.23549e-21	2.06995e-20	-	-	-	-	gi|255587050|ref|XP_002534114.1|/4.04718e-164/conserved hypothetical protein [Ricinus communis]
Pbr006204.1	867	535	45	116.781	10.3246	-3.49965	Down	1.68802e-102	1.15824e-100	K01723|1|2e-89|327|pop:POPTR_644172|hydroperoxide dehydratase [EC:4.2.1.92]	GO:0009526//plastid envelope;GO:0009534//chloroplast thylakoid;GO:0009570//chloroplast stroma	GO:0046872//metal ion binding;GO:0016836//hydro-lyase activity	GO:0019369//arachidonic acid metabolic process;GO:0051707//response to other organism;GO:0009694//jasmonic acid metabolic process;GO:0009719;GO:0006950//response to stress	gi|20160362|emb|CAD29735.1|/1.69705e-90/allene oxide synthase [Solanum tuberosum]
Pbr016408.1	1752	2290	193	247.366	21.913	-3.49679	Down	0	0	K02183|1|1e-87|322|ath:AT5G57580|calmodulin	-	-	-	gi|224123924|ref|XP_002330243.1|/2.97724e-126/predicted protein [Populus trichocarpa]
Pbr011328.1	1731	225	19	24.5994	2.18341	-3.49397	Down	6.21168e-44	1.92767e-42	K01657|1|0.0|838|rcu:RCOM_0592860|anthranilate synthase component I [EC:4.1.3.27]	GO:0043234//protein complex;GO:0009536//plastid	GO:0016833//oxo-acid-lyase activity	GO:0009725//response to hormone stimulus;GO:0009850//auxin metabolic process;GO:0006568//tryptophan metabolic process;GO:0048527//lateral root development;GO:0006950//response to stress	gi|52631037|gb|AAU84988.1|/0/anthranilate synthase alpha 1 [Camptotheca acuminata]
Pbr010824.1	897	59	5	12.448	1.10881	-3.48883	Down	1.88688e-12	2.00501e-11	K01183|1|6e-131|464|gmx:100785900|chitinase [EC:3.2.1.14]	-	GO:0004553//hydrolase activity, hydrolyzing O-glycosyl compounds;GO:0043167//ion binding	GO:0044238//primary metabolic process	gi|10954033|gb|AAG25709.1|AF309514_1/3.77263e-149/class III acidic chitinase [Malus x domestica]
Pbr015609.1	903	47	4	9.85029	0.881154	-3.4827	Down	3.86436e-10	3.43193e-09	-	-	-	-	gi|21592758|gb|AAM64707.1|/3.02485e-29/unknown [Arabidopsis thaliana]
Pbr038248.1	2619	94	8	6.79253	0.607623	-3.4827	Down	4.34354e-19	6.56435e-18	K05387|1|3e-122|437|osa:4347123|glutamate receptor, ionotropic, other eukaryote	GO:0044464//cell part	GO:0005215//transporter activity	-	gi|225461599|ref|XP_002282936.1|/0/PREDICTED: glutamate receptor 2.7-like [Vitis vinifera]
Pbr027366.1	2811	164	14	11.0413	0.99071	-3.47831	Down	2.75016e-32	6.51945e-31	-	GO:0031090//organelle membrane	-	-	gi|357444799|ref|XP_003592677.1|/0/mscS family protein, putative [Medicago truncatula]
Pbr029288.1	2529	281	24	21.0279	1.88774	-3.47758	Down	2.74808e-54	1.0169e-52	K01179|1|6e-179|626|rcu:RCOM_0707630|endoglucanase [EC:3.2.1.4]	GO:0031410//cytoplasmic vesicle	GO:0004553//hydrolase activity, hydrolyzing O-glycosyl compounds	GO:0044238//primary metabolic process	gi|359475982|ref|XP_002280120.2|/0/PREDICTED: endoglucanase 16-like [Vitis vinifera]
Pbr002320.1	900	35	3	7.35978	0.663068	-3.47243	Down	8.14742e-08	5.81086e-07	K06911|1|1e-146|517|gmx:100790637|	-	-	-	gi|356552737|ref|XP_003544719.1|/1.14236e-145/PREDICTED: pirin-like protein-like [Glycine max]
Pbr039601.1	393	70	6	33.7089	3.03695	-3.47243	Down	1.69316e-14	2.03873e-13	-	-	-	-	gi|255557263|ref|XP_002519662.1|/5.8013e-23/conserved hypothetical protein [Ricinus communis]
Pbr005659.1	732	58	5	14.9953	1.35875	-3.46417	Down	3.40392e-12	3.548e-11	K13993|1|2e-22|103|ppp:PHYPADRAFT_81689|HSP20 family protein	-	-	GO:0000302//response to reactive oxygen species;GO:0009642//response to light intensity	gi|255553171|ref|XP_002517628.1|/4.26875e-54/small heat-shock protein, putative [Ricinus communis]
Pbr013933.1	1671	208	18	23.5573	2.14277	-3.45863	Down	2.21618e-40	6.29778e-39	K03327|1|0.0|669|pop:POPTR_903196|multidrug resistance protein, MATE family	GO:0044464//cell part	GO:0022857//transmembrane transporter activity	GO:0006810//transport	gi|224136866|ref|XP_002322435.1|/0/predicted protein [Populus trichocarpa]
Pbr013236.1	315	23	2	13.8184	1.26299	-3.45167	Down	1.80758e-05	9.55353e-05	-	-	-	-	gi|356576271|ref|XP_003556256.1|/1.20044e-12/PREDICTED: protein IDA-LIKE 1-like [Glycine max]
Pbr031227.1	1137	23	2	3.8283	0.349904	-3.45167	Down	1.80758e-05	9.54983e-05	K00861|1|3e-66|250|rcu:RCOM_1095830|riboflavin kinase [EC:2.7.1.26]	-	GO:0016740//transferase activity	-	gi|356546960|ref|XP_003541887.1|/6.03954e-108/PREDICTED: pseudouridine-5'-monophosphatase-like [Glycine max]
Pbr041100.1	2931	23	2	1.48508	0.135736	-3.45167	Down	1.80758e-05	9.55168e-05	K13420|1|3e-70|265|ath:AT5G46330|LRR receptor-like serine/threonine-protein kinase FLS2 [EC:2.7.11.1]	-	-	-	gi|359484185|ref|XP_002273824.2|/0/PREDICTED: LRR receptor-like serine/threonine-protein kinase FLS2-like [Vitis vinifera]
Pbr011743.1	552	68	6	23.3136	2.16218	-3.43061	Down	5.49018e-14	6.42104e-13	-	-	-	GO:0050896//response to stimulus	gi|302398855|gb|ADL36722.1|/5.08633e-81/HD domain class transcription factor [Malus x domestica]
Pbr041050.1	1389	733	65	99.8713	9.30873	-3.42341	Down	3.45356e-137	3.12296e-135	K13065|1|5e-20|97.4|pop:POPTR_784746|shikimate O-hydroxycinnamoyltransferase [EC:2.3.1.133]	-	GO:0016740//transferase activity	-	gi|224107651|ref|XP_002314550.1|/1.65966e-89/predicted protein [Populus trichocarpa]
Pbr042140.1	798	45	4	10.6721	0.997095	-3.41997	Down	1.25655e-09	1.06535e-08	-	-	-	GO:0012501//programmed cell death	gi|225443974|ref|XP_002280537.1|/2.59355e-111/PREDICTED: uncharacterized protein LOC100266950 [Vitis vinifera]
Pbr025813.1	561	190	17	64.0958	6.02789	-3.41051	Down	1.40548e-36	3.67295e-35	K00676|1|4e-14|75.9|ppp:PHYPADRAFT_104139|ribosomal-protein-alanine N-acetyltransferase [EC:2.3.1.128]	-	GO:0016407//acetyltransferase activity	GO:0009725//response to hormone stimulus	gi|225432712|ref|XP_002282836.1|/7.68648e-72/PREDICTED: uncharacterized N-acetyltransferase p20 [Vitis vinifera]
Pbr019425.1	2025	368	33	34.3924	3.24167	-3.40728	Down	2.1149e-69	9.57808e-68	K04733|1|4e-55|214|smo:SELMODRAFT_230241|interleukin-1 receptor-associated kinase 4 [EC:2.7.11.1];K13415|3|1e-53|209|sbi:SORBI_03g032990|protein brassinosteroid insensitive 1 [EC:2.7.10.1 2.7.11.1]	GO:0016020//membrane	GO:0004674//protein serine/threonine kinase activity;GO:0000166//nucleotide binding	GO:0032501//multicellular organismal process;GO:0009755//hormone-mediated signaling pathway	gi|332083027|gb|AEE00746.1|/0/lectin receptor-like kinase [Gossypium hirsutum]
Pbr033469.1	732	256	23	66.1863	6.25023	-3.40455	Down	1.04253e-48	3.52794e-47	-	-	-	-	gi|147841699|emb|CAN77603.1|/3.29129e-30/hypothetical protein VITISV_006917 [Vitis vinifera]
Pbr042724.1	423	745	67	333.315	31.5075	-3.40312	Down	1.10488e-138	1.01253e-136	K13448|1|4e-47|184|rcu:RCOM_1677910|calcium-binding protein CML	-	-	-	gi|255536949|ref|XP_002509541.1|/3.71483e-46/Polcalcin Jun o, putative [Ricinus communis]
Pbr033549.1	936	209	19	42.2581	4.03791	-3.38754	Down	7.28178e-40	2.04376e-38	-	-	-	-	gi|224152016|ref|XP_002337181.1|/2.09036e-129/predicted protein [Populus trichocarpa]
Pbr004961.1	195	747	68	724.978	69.3671	-3.38561	Down	2.01806e-138	1.83704e-136	-	-	-	-	-
Pbr000842.1	2382	1553	142	123.387	11.8584	-3.37921	Down	2.27678e-285	4.67493e-283	K00924|1|2e-76|285|osa:4333525|[EC:2.7.1.-]	GO:0044464//cell part	GO:0042802//identical protein binding;GO:0016301//kinase activity	-	gi|224146317|ref|XP_002325962.1|/0/predicted protein [Populus trichocarpa]
Pbr021651.1	1350	436	40	61.1212	5.89394	-3.37437	Down	3.04222e-81	1.63543e-79	K07300|1|5e-170|595|pop:POPTR_653119|Ca2+:H+ antiporter	GO:0031224//intrinsic to membrane;GO:0000325//plant-type vacuole;GO:0031090//organelle membrane	GO:0005488//binding;GO:0015368//calcium:cation antiporter activity	GO:0051707//response to other organism;GO:0010038//response to metal ion;GO:0015672//monovalent inorganic cation transport;GO:0006875//cellular metal ion homeostasis;GO:0072503;GO:0030001//metal ion transport;GO:0044237//cellular metabolic process	gi|222354619|gb|ACM48123.1|/0/calcium antiporter 1 [Malus x domestica]
Pbr016791.1	1554	76	7	9.25554	0.896038	-3.36869	Down	2.87718e-15	3.62756e-14	-	-	-	-	gi|225440966|ref|XP_002277252.1|/5.17574e-119/PREDICTED: uncharacterized protein LOC100244201 [Vitis vinifera]
Pbr006201.1	945	119	11	23.8317	2.31548	-3.3635	Down	3.736e-23	6.65101e-22	-	GO:0044464//cell part	-	-	gi|224137266|ref|XP_002327083.1|/2.54361e-82/predicted protein [Populus trichocarpa]
Pbr005320.2	1689	108	10	12.1013	1.17774	-3.36107	Down	4.01466e-21	6.57687e-20	K01362|1|8e-14|77.0|cme:CMD006C|[EC:3.4.21.-];K14810|4|1e-09|63.5|ota:Ot01g04880|ATP-dependent RNA helicase DDX56/DBP9 [EC:3.6.4.13]	GO:0009536//plastid;GO:0031981//nuclear lumen	GO:0004175//endopeptidase activity;GO:0016628//oxidoreductase activity, acting on the CH-CH group of donors, NAD or NADP as acceptor	GO:0019538//protein metabolic process	gi|356495905|ref|XP_003516811.1|/0/PREDICTED: protease Do-like 9-like [Glycine max]
Pbr010159.1	501	43	4	16.2431	1.58819	-3.35438	Down	4.05946e-09	3.30136e-08	-	-	-	-	gi|224119890|ref|XP_002318188.1|/3.43041e-32/predicted protein [Populus trichocarpa]
Pbr008619.1	1044	192	18	34.8049	3.42966	-3.34315	Down	2.5107e-36	6.52376e-35	K00750|1|2e-14|78.2|rcu:RCOM_1590700|glycogenin glucosyltransferase [EC:2.4.1.186]	-	GO:0016757//transferase activity, transferring glycosyl groups	GO:0005975//carbohydrate metabolic process;GO:0000302//response to reactive oxygen species;GO:0009642//response to light intensity	gi|224130924|ref|XP_002320958.1|/2.28262e-167/predicted protein [Populus trichocarpa]
Pbr018029.1	762	245	23	60.8485	6.00416	-3.34119	Down	6.25962e-46	2.03747e-44	K09422|1|2e-71|266|pop:POPTR_834662|myb proto-oncogene protein, plant	-	-	-	gi|302398929|gb|ADL36759.1|/4.45533e-134/MYB domain class transcription factor [Malus x domestica]
Pbr036825.1	582	53	5	17.2342	1.70894	-3.3341	Down	6.3775e-11	6.03058e-10	-	-	-	-	-
Pbr017995.3	1104	318	30	54.5126	5.40545	-3.3341	Down	4.68028e-59	1.83905e-57	K14548|1|4e-71|266|aly:ARALYDRAFT_313471|U3 small nucleolar RNA-associated protein 4	-	-	-	gi|255538038|ref|XP_002510084.1|/1.01519e-120/conserved hypothetical protein [Ricinus communis]
Pbr032896.1	432	53	5	23.2183	2.30232	-3.3341	Down	6.3775e-11	6.03267e-10	-	-	-	-	gi|255571214|ref|XP_002526557.1|/5.35143e-13/conserved hypothetical protein [Ricinus communis]
Pbr017074.1	1833	95	9	9.80845	0.976696	-3.32804	Down	1.38646e-18	2.06112e-17	K04733|1|3e-64|244|smo:SELMODRAFT_159261|interleukin-1 receptor-associated kinase 4 [EC:2.7.11.1];K13417|3|7e-62|236|aly:ARALYDRAFT_899604|somatic embryogenesis receptor kinase 4 [EC:2.7.10.1 2.7.11.1];K13418|5|8e-61|233|vvi:100247683|somatic embryogenesis receptor kinase 1 [EC:2.7.10.1 2.7.11.1]	GO:0031410//cytoplasmic vesicle	GO:0004672//protein kinase activity;GO:0032559	GO:0006464//cellular protein modification process	gi|224082334|ref|XP_002306651.1|/0/predicted protein [Populus trichocarpa]
Pbr013610.1	1293	105	10	15.3684	1.53844	-3.32043	Down	2.2938e-20	3.63771e-19	K05391|1|2e-40|164|osa:4330967|cyclic nucleotide gated channel, other eukaryote	GO:0016020//membrane	GO:0005249//voltage-gated potassium channel activity;GO:0005515//protein binding;GO:0005217//intracellular ligand-gated ion channel activity	GO:0070838//divalent metal ion transport	gi|359491254|ref|XP_002280029.2|/4.76879e-43/PREDICTED: putative cyclic nucleotide-gated ion channel 18, partial [Vitis vinifera]
Pbr012624.1	828	63	6	14.3996	1.44145	-3.32043	Down	1.01902e-12	1.10037e-11	K09422|1|6e-91|332|pop:POPTR_648134|myb proto-oncogene protein, plant	GO:0043231//intracellular membrane-bounded organelle	GO:0001071//nucleic acid binding transcription factor activity	GO:0009725//response to hormone stimulus;GO:0006351//transcription, DNA-dependent	gi|224077334|ref|XP_002305215.1|/5.94678e-90/predicted protein [Populus trichocarpa]
Pbr019861.1	1437	21	2	2.76568	0.276855	-3.32043	Down	5.8879e-05	0.000288676	-	-	-	GO:0000741//karyogamy;GO:0009743//response to carbohydrate stimulus	gi|224142786|ref|XP_002324731.1|/1.34294e-174/predicted protein [Populus trichocarpa]
Pbr008748.1	717	21	2	5.54293	0.554869	-3.32043	Down	5.8879e-05	0.000288573	K09422|1|6e-49|192|ath:AT4G37260|myb proto-oncogene protein, plant	-	GO:0001071//nucleic acid binding transcription factor activity	GO:0009725//response to hormone stimulus;GO:0006351//transcription, DNA-dependent;GO:0009743//response to carbohydrate stimulus;GO:0010038//response to metal ion	gi|327412631|emb|CCA29104.1|/7.67233e-77/putative MYB transcription factor [Rosa rugosa]
Pbr020389.1	1341	21	2	2.96367	0.296675	-3.32043	Down	5.8879e-05	0.000288624	K07213|1|6e-06|50.4|gmx:547569|copper chaperone	-	-	-	gi|224132336|ref|XP_002321314.1|/7.49715e-15/predicted protein [Populus trichocarpa]
Pbr006776.1	1440	556	53	73.0721	7.32138	-3.31913	Down	1.17624e-101	8.01046e-100	K09843|1|0.0|763|pop:POPTR_783291|(+)-abscisic acid 8'-hydroxylase [EC:1.14.13.93]	-	GO:0016709//oxidoreductase activity, acting on paired donors, with incorporation or reduction of molecular oxygen, NADH or NADPH as one donor, and incorporation of one atom of oxygen;GO:0005506//iron ion binding	GO:0006952//defense response;GO:0009687//abscisic acid metabolic process;GO:0009416//response to light stimulus;GO:0003006//developmental process involved in reproduction	gi|367465454|gb|AEX15511.1|/0/ABA 8'-hydroxylase [Citrus sinensis]
Pbr013472.1	525	72	7	25.9545	2.65227	-3.29068	Down	2.94206e-14	3.50086e-13	-	-	-	-	gi|297811773|ref|XP_002873770.1|/9.24927e-18/hypothetical protein ARALYDRAFT_488488 [Arabidopsis lyrata subsp. lyrata]
Pbr027364.1	1725	401	39	43.9941	4.49733	-3.29017	Down	3.41258e-73	1.64074e-71	K13118|1|3e-11|68.6|cre:CHLREDRAFT_17930|protein DGCR14;K06694|3|2e-10|65.9|vvi:100257739|26S proteasome non-ATPase regulatory subunit 10	-	-	-	gi|224117420|ref|XP_002317570.1|/3.76754e-166/predicted protein [Populus trichocarpa]
Pbr026660.1	3525	41	4	2.20122	0.225725	-3.28566	Down	1.30228e-08	1.00492e-07	K08286|1|1e-104|380|ath:AT4G28490|protein-serine/threonine kinase [EC:2.7.11.-]	GO:0044464//cell part	GO:0016740//transferase activity	-	gi|255571222|ref|XP_002526561.1|/0/receptor protein kinase, putative [Ricinus communis]
Pbr035320.1	1380	162	16	22.2165	2.30632	-3.26796	Down	2.8497e-30	6.32189e-29	K04733|1|3e-54|211|aly:ARALYDRAFT_916421|interleukin-1 receptor-associated kinase 4 [EC:2.7.11.1];K00924|3|5e-38|157|ath:AT3G59420|[EC:2.7.1.-]	-	GO:0016740//transferase activity	-	gi|339431366|gb|AEJ72559.1|/4.08691e-173/putative serine/threonine kinase [Malus x domestica]
Pbr026578.1	558	182	18	61.7272	6.41679	-3.26598	Down	8.1206e-34	1.98359e-32	-	-	-	-	-
Pbr010513.1	1440	554	55	72.8092	7.59765	-3.26049	Down	1.11528e-99	7.465e-98	K01590|1|0.0|826|vvi:100258141|histidine decarboxylase [EC:4.1.1.22]	-	GO:0016831//carboxy-lyase activity;GO:0048037//cofactor binding	GO:0003006//developmental process involved in reproduction;GO:0019752//carboxylic acid metabolic process	gi|225463912|ref|XP_002266398.1|/0/PREDICTED: histidine decarboxylase-like [Vitis vinifera]
Pbr039705.1	654	30	3	8.68126	0.912479	-3.25004	Down	1.53021e-06	9.38854e-06	K03239|1|1e-32|137|vvi:100244672|translation initiation factor eIF-2B subunit alpha	-	-	-	gi|297742543|emb|CBI34692.3|/3.42204e-54/unnamed protein product [Vitis vinifera]
Pbr008059.1	732	30	3	7.7562	0.815248	-3.25004	Down	1.53021e-06	9.38643e-06	-	-	-	-	gi|147841699|emb|CAN77603.1|/1.1312e-30/hypothetical protein VITISV_006917 [Vitis vinifera]
Pbr027272.1	1875	50	5	5.0467	0.530454	-3.25004	Down	3.63686e-10	3.2362e-09	K06685|1|4e-09|61.6|ath:AT4G19050|maintenance of ploidy protein MOB1 (MPS1 binder 1);K13420|3|7e-09|60.8|ath:AT5G46330|LRR receptor-like serine/threonine-protein kinase FLS2 [EC:2.7.11.1];K13415|4|5e-07|54.7|aly:ARALYDRAFT_912402|protein brassinosteroid insensitive 1 [EC:2.7.10.1 2.7.11.1]	-	-	-	gi|332330343|gb|AEE43929.1|/3.97011e-100/TIR-NBS-LRR resistance protein muRdr1E [Rosa multiflora]
Pbr013457.1	1545	120	12	14.6991	1.54501	-3.25004	Down	1.13833e-22	1.98764e-21	K04733|1|4e-40|164|smo:SELMODRAFT_159261|interleukin-1 receptor-associated kinase 4 [EC:2.7.11.1];K13430|4|2e-34|145|zma:100283091|serine/threonine-protein kinase PBS1 [EC:2.7.11.1]	-	GO:0005488//binding;GO:0004672//protein kinase activity	-	gi|359492347|ref|XP_003634400.1|/3.03903e-87/PREDICTED: wall-associated receptor kinase 2-like [Vitis vinifera]
Pbr030909.1	513	70	7	25.8238	2.71431	-3.25004	Down	9.34468e-14	1.07722e-12	-	-	-	GO:0050896//response to stimulus	gi|237770135|gb|ACR19031.1|/4.95639e-90/TIR-NBS-LRR-type disease resistance-like protein [Pyrus x bretschneideri]
Pbr038854.1	1419	229	23	30.5416	3.22422	-3.24375	Down	6.38774e-42	1.88995e-40	K05929|1|0.0|833|rcu:RCOM_0161380|phosphoethanolamine N-methyltransferase [EC:2.1.1.103]	GO:0044424//intracellular part	GO:0008170//N-methyltransferase activity;GO:0016410//N-acyltransferase activity	GO:0048868//pollen tube development;GO:0006498//N-terminal protein lipidation;GO:0050896//response to stimulus;GO:0048229//gametophyte development;GO:0046470//phosphatidylcholine metabolic process;GO:0006730//one-carbon metabolic process;GO:0019695//choline metabolic process;GO:0009791//post-embryonic development;GO:0000904//cell morphogenesis involved in differentiation	gi|353529380|gb|AER10512.1|/0/phosphoethanolamine N-methyltransferase [Pyrus betulifolia]
Pbr015674.1	357	455	46	241.203	25.6312	-3.23427	Down	1.47584e-81	7.96515e-80	-	-	-	-	gi|224072929|ref|XP_002303937.1|/5.14729e-11/predicted protein [Populus trichocarpa]
Pbr037293.1	3225	246	25	14.4359	1.54202	-3.22677	Down	1.03317e-44	3.26182e-43	K08286|1|5e-96|351|ath:AT4G28490|protein-serine/threonine kinase [EC:2.7.11.-];K00924|3|3e-92|338|aly:ARALYDRAFT_473063|[EC:2.7.1.-];K13420|5|9e-90|330|pop:POPTR_1075175|LRR receptor-like serine/threonine-protein kinase FLS2 [EC:2.7.11.1]	-	GO:0003824//catalytic activity	-	gi|224132304|ref|XP_002321306.1|/0/predicted protein [Populus trichocarpa]
Pbr006802.1	1581	1893	193	226.599	24.2831	-3.22211	Down	0	0	K13496|1|8e-35|99.4|ath:AT2G36780|UDP-glucosyl transferase 73C [EC:2.4.1.-]	-	GO:0016757//transferase activity, transferring glycosyl groups	-	gi|357484697|ref|XP_003612636.1|/7.96196e-80/Cis-zeatin O-glucosyltransferase [Medicago truncatula]
Pbr008188.1	708	196	20	52.3916	5.61922	-3.22089	Down	7.29014e-36	1.86411e-34	-	-	-	-	gi|359492809|ref|XP_003634468.1|/7.56614e-37/PREDICTED: uncharacterized protein LOC100853421 [Vitis vinifera]
Pbr020869.1	669	49	5	13.8615	1.4867	-3.22089	Down	6.47684e-10	5.64738e-09	-	GO:0043231//intracellular membrane-bounded organelle	-	-	gi|224119990|ref|XP_002331110.1|/6.31618e-67/predicted protein [Populus trichocarpa]
Pbr037073.1	801	88	9	20.7917	2.23506	-3.21762	Down	7.88744e-17	1.07699e-15	K07025|1|1e-96|350|pop:POPTR_658536|putative hydrolase of the HAD superfamily	-	GO:0003824//catalytic activity	-	gi|224108057|ref|XP_002314706.1|/1.53809e-95/predicted protein [Populus trichocarpa]
Pbr005802.1	1101	1112	114	191.142	20.5967	-3.21416	Down	9.99678e-196	1.26978e-193	K00083|1|9e-114|408|vvi:100245522|cinnamyl-alcohol dehydrogenase [EC:1.1.1.195]	GO:0005576//extracellular region	GO:0046914//transition metal ion binding;GO:0016616//oxidoreductase activity, acting on the CH-OH group of donors, NAD or NADP as acceptor	GO:0009699//phenylpropanoid biosynthetic process	gi|255539034|ref|XP_002510582.1|/5.47094e-167/alcohol dehydrogenase, putative [Ricinus communis]
Pbr032370.1	858	39	4	8.60234	0.927368	-3.21351	Down	4.14588e-08	3.046e-07	-	GO:0030312//external encapsulating structure	GO:0004553//hydrolase activity, hydrolyzing O-glycosyl compounds	GO:0008152//metabolic process	gi|13548679|dbj|BAB40807.1|/1.02944e-140/endo-1,3-beta-glucanase-like protein [Pyrus pyrifolia]
Pbr004331.1	777	117	12	28.4973	3.07213	-3.21351	Down	6.37314e-22	1.08236e-20	-	-	-	-	gi|359472571|ref|XP_002281609.2|/2.69283e-41/PREDICTED: protein OBERON 3-like [Vitis vinifera]
Pbr009672.1	963	97	10	19.0627	2.06563	-3.2061	Down	2.30926e-18	3.40149e-17	-	-	-	-	gi|224104117|ref|XP_002313325.1|/1.83774e-43/predicted protein [Populus trichocarpa]
Pbr029714.1	291	291	30	189.251	20.5073	-3.2061	Down	2.60976e-52	9.31633e-51	-	-	-	-	gi|225431477|ref|XP_002280908.1|/2.9235e-19/PREDICTED: uncharacterized protein LOC100266089 [Vitis vinifera]
Pbr035966.1	1458	833	87	108.125	11.8697	-3.18734	Down	6.3966e-146	6.12929e-144	K13065|1|4e-28|124|aly:ARALYDRAFT_892660|shikimate O-hydroxycinnamoyltransferase [EC:2.3.1.133]	-	GO:0016747//transferase activity, transferring acyl groups other than amino-acyl groups	-	gi|359481680|ref|XP_002278801.2|/0/PREDICTED: BAHD acyltransferase DCR-like [Vitis vinifera]
Pbr036210.1	1314	919	96	132.361	14.533	-3.18707	Down	8.62692e-161	8.99208e-159	K14018|1|4e-16|84.3|ppp:PHYPADRAFT_161889|phospholipase A-2-activating protein	GO:0031234//extrinsic to internal side of plasma membrane	GO:0004683//calmodulin-dependent protein kinase activity	-	gi|224107729|ref|XP_002314580.1|/2.1825e-144/predicted protein [Populus trichocarpa]
Pbr005042.2	873	67	7	14.5244	1.59501	-3.18685	Down	5.24174e-13	5.77437e-12	-	-	-	-	gi|224115082|ref|XP_002316935.1|/4.80623e-109/predicted protein [Populus trichocarpa]
Pbr025951.1	1863	19	2	1.9301	0.213548	-3.17604	Down	0.000189277	0.000843224	K06694|1|3e-08|58.9|mtr:MTR_5g043640|26S proteasome non-ATPase regulatory subunit 10;K13118|5|8e-08|57.4|cre:CHLREDRAFT_17930|protein DGCR14	-	-	-	gi|255585399|ref|XP_002533395.1|/1.76361e-108/ankyrin repeat-containing protein, putative [Ricinus communis]
Pbr002730.1	3087	19	2	1.16481	0.128876	-3.17604	Down	0.000189277	0.000843086	K01537|1|0.0|1318|ath:AT3G22910|Ca2+-transporting ATPase [EC:3.6.3.8]	GO:0031224//intrinsic to membrane	GO:0046873//metal ion transmembrane transporter activity;GO:0019829//cation-transporting ATPase activity;GO:0005515//protein binding;GO:0032559	GO:0009206;GO:0006816//calcium ion transport	gi|255552023|ref|XP_002517056.1|/0/cation-transporting atpase plant, putative [Ricinus communis]
Pbr033574.1	1725	19	2	2.08451	0.230632	-3.17604	Down	0.000189277	0.000842811	K00666|1|8e-145|512|sbi:SORBI_10g012080|fatty-acyl-CoA synthase [EC:6.2.1.-];K01904|3|5e-43|174|ppp:PHYPADRAFT_113172|4-coumarate--CoA ligase [EC:6.2.1.12]	-	GO:0003824//catalytic activity	-	gi|225466273|ref|XP_002272437.1|/0/PREDICTED: medium-chain-fatty-acid--CoA ligase [Vitis vinifera]
Pbr033736.1	993	19	2	3.62112	0.400645	-3.17604	Down	0.000189277	0.000843361	K04124|1|6e-34|142|pop:POPTR_548646|gibberellin 3-beta-dioxygenase [EC:1.14.11.15];K06892|2|5e-33|139|pop:POPTR_550478|	-	GO:0016706//oxidoreductase activity, acting on paired donors, with incorporation or reduction of molecular oxygen, 2-oxoglutarate as one donor, and incorporation of one atom each of oxygen into both donors	GO:0044249//cellular biosynthetic process	gi|224055327|ref|XP_002298482.1|/1.69478e-116/20G-Fe(II) oxidoreductase [Populus trichocarpa]
Pbr030906.5	2496	304	32	23.0498	2.55026	-3.17604	Down	4.13648e-54	1.52653e-52	K13457|1|4e-14|79.0|osa:4342596|disease resistance protein RPM1	-	-	-	gi|237770135|gb|ACR19031.1|/0/TIR-NBS-LRR-type disease resistance-like protein [Pyrus x bretschneideri]
Pbr034558.2	2283	19	2	1.57502	0.174262	-3.17604	Down	0.000189277	0.000842948	K05658|1|2e-55|215|vvi:100262734|ATP-binding cassette, subfamily B (MDR/TAP), member 1;K13416|2|2e-55|215|rcu:RCOM_1534760|brassinosteroid insensitive 1-associated receptor kinase 1 [EC:2.7.10.1 2.7.11.1];K13418|3|9e-54|210|vvi:100247683|somatic embryogenesis receptor kinase 1 [EC:2.7.10.1 2.7.11.1]	GO:0016020//membrane	GO:0030246//carbohydrate binding;GO:0004672//protein kinase activity;GO:0032559	GO:0006464//cellular protein modification process	gi|225439920|ref|XP_002275244.1|/0/PREDICTED: L-type lectin-domain containing receptor kinase VIII.1 [Vitis vinifera]
Pbr021561.1	381	398	42	197.696	21.9282	-3.17242	Down	2.77768e-70	1.28787e-68	-	-	-	-	gi|255590302|ref|XP_002535232.1|/3.80149e-35/metal ion binding protein, putative [Ricinus communis]
Pbr024661.1	660	1070	113	306.817	34.0576	-3.17133	Down	4.79102e-186	5.81502e-184	-	GO:0016020//membrane	-	-	gi|224072044|ref|XP_002303614.1|/8.02983e-59/predicted protein [Populus trichocarpa]
Pbr006205.1	561	329	35	110.987	12.4104	-3.16077	Down	3.5762e-58	1.39518e-56	K01723|1|1e-87|320|gmx:100037481|hydroperoxide dehydratase [EC:4.2.1.92]	-	GO:0016491//oxidoreductase activity;GO:0005506//iron ion binding	-	gi|351721152|ref|NP_001236432.1|/1.10479e-86/allene oxide synthase [Glycine max]
Pbr010788.1	633	28	3	8.37131	0.942751	-3.1505	Down	4.8624e-06	2.78614e-05	-	-	-	-	gi|224135135|ref|XP_002321992.1|/3.86213e-34/predicted protein [Populus trichocarpa]
Pbr001309.1	2244	948	102	79.9511	9.04184	-3.14443	Down	1.0315e-163	1.09607e-161	K05681|1|3e-86|318|cme:CMS467C|ATP-binding cassette, subfamily G (WHITE), member 2;K12843|2|2e-71|269|vvi:100248403|U4/U6 small nuclear ribonucleoprotein PRP3;K05658|4|2e-17|89.7|bdi:100821986|ATP-binding cassette, subfamily B (MDR/TAP), member 1	GO:0044464//cell part	GO:0017111//nucleoside-triphosphatase activity;GO:0015098//molybdate ion transmembrane transporter activity;GO:0032559	GO:0009207	gi|224138238|ref|XP_002322764.1|/0/white-brown-complex ABC transporter family [Populus trichocarpa]
Pbr002869.1	1089	352	38	61.1722	6.94121	-3.13962	Down	9.61306e-62	3.91242e-60	-	-	GO:0004175//endopeptidase activity	GO:0019538//protein metabolic process	gi|225454952|ref|XP_002280421.1|/2.12566e-147/PREDICTED: metacaspase-1 [Vitis vinifera]
Pbr001663.1	1143	74	8	12.2525	1.39227	-3.13757	Down	4.73498e-14	5.55922e-13	-	-	-	-	gi|255548209|ref|XP_002515161.1|/6.41712e-41/conserved hypothetical protein [Ricinus communis]
Pbr037422.1	2268	120	13	10.0133	1.1402	-3.13456	Down	5.77538e-22	9.82066e-21	-	GO:0016020//membrane	-	-	gi|225444686|ref|XP_002277641.1|/0/PREDICTED: inter-alpha-trypsin inhibitor heavy chain H3 [Vitis vinifera]
Pbr004165.1	432	1241	136	543.66	62.6231	-3.11794	Down	4.98422e-212	7.24011e-210	-	-	-	-	-
Pbr025078.1	1512	45	5	5.63248	0.657806	-3.09804	Down	6.40094e-09	5.10226e-08	K07119|1|3e-124|443|vvi:100256090|;K08070|5|4e-118|423|aly:ARALYDRAFT_909687|2-alkenal reductase [EC:1.3.1.74]	GO:0016020//membrane;GO:0044444//cytoplasmic part	GO:0016628//oxidoreductase activity, acting on the CH-CH group of donors, NAD or NADP as acceptor;GO:0046914//transition metal ion binding	GO:0008152//metabolic process;GO:0006950//response to stress;GO:0010038//response to metal ion	gi|225434189|ref|XP_002279359.1|/3.33932e-123/PREDICTED: NADP-dependent alkenal double bond reductase P2 [Vitis vinifera]
Pbr016167.1	1458	117	13	15.1868	1.77364	-3.09804	Down	3.1619e-21	5.19545e-20	K15400|1|2e-22|105|zma:100284056|omega-hydroxypalmitate O-feruloyl transferase [EC:2.3.1.188]	-	GO:0016413//O-acetyltransferase activity	-	gi|356546599|ref|XP_003541712.1|/4.18149e-99/PREDICTED: 10-deacetylbaccatin III 10-O-acetyltransferase-like [Glycine max]
Pbr024728.1	594	27	3	8.60234	1.00465	-3.09804	Down	8.63092e-06	4.77613e-05	-	-	-	-	gi|224093616|ref|XP_002309943.1|/1.24153e-09/predicted protein [Populus trichocarpa]
Pbr001067.1	567	125	14	41.7221	4.91162	-3.08654	Down	1.64545e-22	2.86031e-21	-	-	-	-	gi|255568645|ref|XP_002525296.1|/3.36688e-22/conserved hypothetical protein [Ricinus communis]
Pbr031669.1	537	160	18	56.3878	6.66772	-3.08012	Down	2.26136e-28	4.78354e-27	-	-	-	-	gi|356520454|ref|XP_003528877.1|/1.0965e-45/PREDICTED: BON1-associated protein 2-like [Glycine max]
Pbr007558.1	1503	416	47	52.381	6.2204	-3.07396	Down	3.05318e-71	1.43263e-69	-	-	-	-	gi|224132024|ref|XP_002328166.1|/1.31176e-95/predicted protein [Populus trichocarpa]
Pbr002726.1	1047	88	10	15.9065	1.89991	-3.06562	Down	3.85644e-16	5.10003e-15	-	-	-	-	gi|255587050|ref|XP_002534114.1|/3.66052e-165/conserved hypothetical protein [Ricinus communis]
Pbr025000.1	471	44	5	17.6795	2.11168	-3.06562	Down	1.12953e-08	8.80819e-08	K13993|1|7e-68|253|vvi:100245734|HSP20 family protein	-	-	-	gi|259123935|gb|ACV93250.1|/1.45153e-68/CII small heat shock protein 1 [Prunus salicina]
Pbr026481.1	2451	653	75	50.4207	6.08692	-3.05023	Down	4.67454e-110	3.45019e-108	K04733|1|2e-121|434|ath:AT5G38990|interleukin-1 receptor-associated kinase 4 [EC:2.7.11.1];K00924|3|2e-58|225|osa:4333525|[EC:2.7.1.-]	GO:0016020//membrane	GO:0004672//protein kinase activity	GO:0043401//steroid hormone mediated signaling pathway;GO:0001558//regulation of cell growth;GO:0000902//cell morphogenesis;GO:0007275//multicellular organismal development	gi|224109624|ref|XP_002315260.1|/0/predicted protein [Populus trichocarpa]
Pbr013965.1	1212	26	3	4.05985	0.492377	-3.04359	Down	1.52731e-05	8.14795e-05	K10143|1|8e-53|206|pop:POPTR_807645|E3 ubiquitin-protein ligase RFWD2 [EC:6.3.2.19]	-	GO:0003824//catalytic activity	-	gi|225470155|ref|XP_002267663.1|/2.098e-138/PREDICTED: E3 ubiquitin-protein ligase COP1-like [Vitis vinifera]
Pbr010520.1	1077	207	24	36.3742	4.43277	-3.03664	Down	8.33988e-36	2.12854e-34	-	-	-	-	gi|399920201|gb|AFP55548.1|/6.58779e-101/TIR-NBS-LRR [Rosa rugosa]
Pbr008588.1	1068	129	15	22.859	2.79383	-3.03245	Down	8.1293e-23	1.42859e-21	-	-	GO:0016787//hydrolase activity	-	gi|356554340|ref|XP_003545505.1|/2.46554e-108/PREDICTED: nudix hydrolase 2-like [Glycine max]
Pbr027347.1	1752	1116	130	120.551	14.7601	-3.02987	Down	1.28702e-185	1.55519e-183	K14494|1|5e-59|227|rcu:RCOM_0826140|DELLA protein	-	-	-	gi|224126261|ref|XP_002319796.1|/0/GRAS family transcription factor [Populus trichocarpa]
Pbr020255.1	2100	2867	337	258.373	31.922	-3.01683	Down	0	0	-	-	GO:0004091//carboxylesterase activity	GO:0044238//primary metabolic process	gi|225455868|ref|XP_002274587.1|/0/PREDICTED: lysosomal acid lipase/cholesteryl ester hydrolase-like [Vitis vinifera]
Pbr009373.1	1422	34	4	4.525	0.559551	-3.01558	Down	7.21458e-07	4.5894e-06	K14489|1|2e-10|65.9|vvi:100263145|arabidopsis histidine kinase 2/3/4 (cytokinin receptor) [EC:2.7.13.3]	GO:0030312//external encapsulating structure	GO:0004553//hydrolase activity, hydrolyzing O-glycosyl compounds	GO:0008152//metabolic process	gi|222139398|gb|ACM45718.1|/0/endo-1,3-beta-glucanase [Pyrus pyrifolia]
Pbr029618.1	1194	391	46	61.9743	7.6636	-3.01558	Down	7.85108e-66	3.39786e-64	K02291|1|4e-180|629|vvi:100252385|phytoene synthase [EC:2.5.1.32]	GO:0009536//plastid	GO:0004337//geranyltranstransferase activity	GO:0016109	gi|399967021|gb|AFP65822.1|/0/phytoene synthase, partial [Eriobotrya japonica]
Pbr016637.1	1101	623	74	107.088	13.3698	-3.00175	Down	1.90359e-103	1.31942e-101	K00924|1|7e-19|93.2|ath:AT5G22850|[EC:2.7.1.-]	GO:0044464//cell part	GO:0004175//endopeptidase activity	GO:0019538//protein metabolic process;GO:0009987//cellular process	gi|224065128|ref|XP_002301682.1|/3.54616e-166/predicted protein [Populus trichocarpa]
Pbr003340.1	585	92	11	29.7626	3.74038	-2.99224	Down	1.86943e-16	2.51737e-15	-	-	-	-	gi|224077362|ref|XP_002335799.1|/1.25968e-59/predicted protein [Populus trichocarpa]
Pbr025088.1	2460	2708	324	208.33	26.1993	-2.99127	Down	0	0	K13460|1|1e-19|97.1|ath:AT1G12220|disease resistance protein RPS5;K13457|2|4e-18|92.0|sbi:SORBI_10g028730|disease resistance protein RPM1;K13459|3|4e-17|88.6|aly:ARALYDRAFT_913954|disease resistance protein RPS2	-	-	-	gi|359480461|ref|XP_002268207.2|/0/PREDICTED: probable disease resistance protein At5g66900-like [Vitis vinifera]
Pbr019199.1	2172	25	3	2.17831	0.274752	-2.98701	Down	2.69384e-05	0.000138987	K06685|1|3e-21|102|aly:ARALYDRAFT_492950|maintenance of ploidy protein MOB1 (MPS1 binder 1)	-	-	-	gi|225448053|ref|XP_002273151.1|/1.38433e-83/PREDICTED: TMV resistance protein N-like [Vitis vinifera]
Pbr027847.1	1866	446	54	45.2337	5.75654	-2.97412	Down	7.39974e-74	3.58297e-72	-	-	-	-	gi|147828189|emb|CAN68625.1|/5.08248e-148/hypothetical protein VITISV_010683 [Vitis vinifera]
Pbr009085.1	1014	1370	166	255.695	32.5649	-2.97303	Down	3.3493e-223	5.22663e-221	K04125|1|3e-150|529|pop:POPTR_550316|gibberellin 2-oxidase [EC:1.14.11.13]	-	GO:0003824//catalytic activity;GO:0046914//transition metal ion binding	GO:0008152//metabolic process	gi|350285025|gb|AEQ27855.1|/0/GA2-oxidase [Pyrus communis]
Pbr016272.1	780	33	4	8.00679	1.0201	-2.97251	Down	1.26789e-06	7.86567e-06	K01953|1|5e-08|56.2|smo:SELMODRAFT_145135|asparagine synthase (glutamine-hydrolysing) [EC:6.3.5.4]	-	-	-	gi|356555204|ref|XP_003545925.1|/5.5645e-95/PREDICTED: stem-specific protein TSJT1-like [Glycine max]
Pbr000527.1	246	82	10	63.0838	8.0862	-2.96374	Down	1.11447e-14	1.35992e-13	-	-	-	-	gi|225443736|ref|XP_002265506.1|/2.04913e-20/PREDICTED: uncharacterized protein LOC100246308 [Vitis vinifera]
Pbr011415.1	774	804	99	196.587	25.4433	-2.94981	Down	1.04142e-130	8.97165e-129	-	-	GO:0032559	-	gi|255566442|ref|XP_002524206.1|/7.01875e-50/Ribulose bisphosphate carboxylase/oxygenase activase 1, chloroplast precursor, putative [Ricinus communis]
Pbr006863.1	1845	1151	142	118.064	15.3099	-2.94704	Down	3.60406e-186	4.3939e-184	K06694|1|4e-06|51.6|cre:CHLREDRAFT_140415|26S proteasome non-ATPase regulatory subunit 10	-	-	-	gi|357454833|ref|XP_003597697.1|/2.9715e-108/Ankyrin repeat-containing protein [Medicago truncatula]
Pbr031832.1	816	275	34	63.7796	8.28835	-2.94394	Down	1.09234e-45	3.54706e-44	K12135|1|1e-07|55.5|ath:AT5G15840|zinc finger protein CONSTANS	-	-	GO:0006351//transcription, DNA-dependent;GO:0009743//response to carbohydrate stimulus;GO:0009411//response to UV	gi|302398747|gb|ADL36668.1|/2.95422e-110/COL domain class transcription factor [Malus x domestica]
Pbr040608.1	2382	192	24	15.2545	2.00424	-2.92811	Down	3.5139e-32	8.27251e-31	-	GO:0043231//intracellular membrane-bounded organelle	-	-	gi|225459284|ref|XP_002285786.1|/3.22922e-174/PREDICTED: uncharacterized protein LOC100252301 [Vitis vinifera]
Pbr005639.1	2562	24	3	1.77285	0.232928	-2.92811	Down	4.73474e-05	0.000235693	K06685|1|1e-16|87.4|pop:POPTR_554110|maintenance of ploidy protein MOB1 (MPS1 binder 1)	GO:0044444//cytoplasmic part	GO:0042802//identical protein binding;GO:0031072//heat shock protein binding	GO:0003002//regionalization;GO:0009725//response to hormone stimulus;GO:0003006//developmental process involved in reproduction;GO:0007165//signal transduction	gi|356526242|ref|XP_003531727.1|/4.09553e-114/PREDICTED: protein TOPLESS-like [Glycine max]
Pbr010296.1	2244	9618	1211	811.15	107.35	-2.91765	Down	0	0	K05681|1|2e-78|291|cme:CMS467C|ATP-binding cassette, subfamily G (WHITE), member 2;K12843|2|5e-68|257|vvi:100248403|U4/U6 small nuclear ribonucleoprotein PRP3;K05658|4|2e-19|96.3|bdi:100821986|ATP-binding cassette, subfamily B (MDR/TAP), member 1	GO:0044464//cell part	GO:0017111//nucleoside-triphosphatase activity;GO:0015098//molybdate ion transmembrane transporter activity;GO:0032559	GO:0009207	gi|224138238|ref|XP_002322764.1|/0/white-brown-complex ABC transporter family [Populus trichocarpa]
Pbr007494.1	2325	111	14	9.03523	1.1978	-2.91517	Down	4.10926e-19	6.21372e-18	K04733|1|7e-51|200|aly:ARALYDRAFT_916421|interleukin-1 receptor-associated kinase 4 [EC:2.7.11.1];K13430|3|9e-49|193|rcu:RCOM_1078760|serine/threonine-protein kinase PBS1 [EC:2.7.11.1]	-	GO:0004871//signal transducer activity;GO:0004674//protein serine/threonine kinase activity;GO:0000166//nucleotide binding	GO:0009987//cellular process	gi|359477044|ref|XP_002275760.2|/0/PREDICTED: G-type lectin S-receptor-like serine/threonine-protein kinase RLK1-like [Vitis vinifera]
Pbr028998.1	3102	237	30	14.4592	1.9238	-2.90997	Down	3.87808e-39	1.07084e-37	K13428|1|0.0|775|ath:AT5G20480|LRR receptor-like serine/threonine-protein kinase EFR [EC:2.7.11.1];K13420|3|7e-129|460|osa:4337016|LRR receptor-like serine/threonine-protein kinase FLS2 [EC:2.7.11.1]	-	GO:0004672//protein kinase activity	-	gi|359486510|ref|XP_002271317.2|/0/PREDICTED: probable LRR receptor-like serine/threonine-protein kinase At3g47570-like, partial [Vitis vinifera]
Pbr022979.1	993	55	7	10.4822	1.40226	-2.90212	Down	4.5643e-10	4.02605e-09	-	-	-	-	gi|297744655|emb|CBI37917.3|/1.37437e-33/unnamed protein product [Vitis vinifera]
Pbr002268.1	1197	400	51	63.2419	8.47531	-2.89954	Down	9.36562e-65	3.97769e-63	-	-	-	-	gi|225430122|ref|XP_002284674.1|/5.43436e-131/PREDICTED: uncharacterized protein LOC100247517 [Vitis vinifera]
Pbr002269.1	900	813	104	170.957	22.9864	-2.89478	Down	1.16012e-129	9.86971e-128	K10144|1|5e-138|488|pop:POPTR_654056|RING finger and CHY zinc finger domain-containing protein 1 [EC:6.3.2.19]	-	GO:0046914//transition metal ion binding	-	gi|224092372|ref|XP_002309580.1|/5.68265e-137/predicted protein [Populus trichocarpa]
Pbr039854.1	1191	31	4	4.92594	0.668079	-2.88231	Down	3.8824e-06	2.2568e-05	K05283|1|1e-20|99.0|aly:ARALYDRAFT_354960|phosphatidylinositol glycan, class W [EC:2.3.-.-];K14297|2|3e-09|61.2|mtr:MTR_1g066430|nuclear pore complex protein Nup98-Nup96;K15692|3|9e-09|59.7|gmx:100793048|E3 ubiquitin-protein ligase RNF13 [EC:6.3.2.19];K11982|5|2e-08|58.5|rcu:RCOM_1031870|E3 ubiquitin-protein ligase RNF115/126 [EC:6.3.2.19]	-	-	-	gi|359475158|ref|XP_002281140.2|/1.57322e-122/PREDICTED: RING-H2 finger protein ATL65-like [Vitis vinifera]
Pbr020894.2	3432	62	8	3.41888	0.463684	-2.88231	Down	3.983e-11	3.82192e-10	K13420|1|3e-163|574|sbi:SORBI_06g028760|LRR receptor-like serine/threonine-protein kinase FLS2 [EC:2.7.11.1]	-	GO:0004672//protein kinase activity;GO:0000166//nucleotide binding	GO:0009987//cellular process;GO:0008152//metabolic process	gi|225456159|ref|XP_002278561.1|/0/PREDICTED: probable LRR receptor-like serine/threonine-protein kinase At4g08850-like [Vitis vinifera]
Pbr000997.2	588	3390	438	1091.09	148.175	-2.8804	Down	0	0	-	-	-	-	gi|225436956|ref|XP_002276328.1|/1.15127e-68/PREDICTED: EID1-like F-box protein 3-like [Vitis vinifera]
Pbr016380.1	1872	85	11	8.59315	1.16887	-2.87807	Down	9.08194e-15	1.11519e-13	K06685|1|1e-06|53.5|ath:AT4G19050|maintenance of ploidy protein MOB1 (MPS1 binder 1);K13457|2|3e-06|52.4|vvi:100252764|disease resistance protein RPM1;K03013|4|1e-05|50.4|vvi:100258335|DNA-directed RNA polymerases I, II, and III subunit RPABC1	-	-	-	gi|315507085|gb|ADU33178.1|/1.72262e-95/putative TIR-NBS-LRR-AAA+ATPase [Cucumis sativus]
Pbr023386.1	279	184	24	124.811	17.1114	-2.86671	Down	2.86378e-30	6.34797e-29	-	-	-	-	gi|224138054|ref|XP_002322718.1|/3.74792e-14/predicted protein [Populus trichocarpa]
Pbr010542.1	1539	23	3	2.82832	0.387759	-2.86671	Down	8.2906e-05	0.000395196	K13407|1|1e-122|438|vvi:100259592|cytochrome P450, family 94, subfamily A, polypeptide 1 (fatty acid omega-hydroxylase) [EC:1.14.-.-];K00517|3|2e-115|414|ath:AT3G56630|[EC:1.14.-.-]	GO:0031410//cytoplasmic vesicle	GO:0005506//iron ion binding;GO:0016712//oxidoreductase activity, acting on paired donors, with incorporation or reduction of molecular oxygen, reduced flavin or flavoprotein as one donor, and incorporation of one atom of oxygen	GO:0008152//metabolic process	gi|224121982|ref|XP_002318721.1|/0/predicted protein [Populus trichocarpa]
Pbr035351.1	786	23	3	5.53789	0.759238	-2.86671	Down	8.2906e-05	0.000395265	-	GO:0016020//membrane;GO:0043231//intracellular membrane-bounded organelle	-	-	gi|224134873|ref|XP_002321926.1|/1.48541e-95/predicted protein [Populus trichocarpa]
Pbr040230.1	1842	69	9	7.08922	0.971924	-2.86671	Down	3.49464e-12	3.6384e-11	-	GO:0031410//cytoplasmic vesicle	-	GO:0003006//developmental process involved in reproduction	gi|357462429|ref|XP_003601496.1|/8.90361e-173/Membrane protein, putative [Medicago truncatula]
Pbr023414.1	1251	728	95	110.132	15.1059	-2.86605	Down	4.12246e-115	3.18924e-113	K00942|1|6e-171|598|pop:POPTR_652750|guanylate kinase [EC:2.7.4.8]	-	GO:0016776//phosphotransferase activity, phosphate group as acceptor	GO:0009117//nucleotide metabolic process;GO:0006796//phosphate-containing compound metabolic process	gi|224087031|ref|XP_002308036.1|/6.33071e-170/predicted protein [Populus trichocarpa]
Pbr034612.1	1104	1996	261	342.161	47.0274	-2.8631	Down	0	0	-	-	GO:0046872//metal ion binding	-	gi|255586847|ref|XP_002534034.1|/3.2356e-151/calcium ion binding protein, putative [Ricinus communis]
Pbr020983.1	975	130	17	25.2335	3.46836	-2.86302	Down	8.9786e-22	1.51449e-20	K04125|1|7e-139|491|pop:POPTR_550316|gibberellin 2-oxidase [EC:1.14.11.13]	-	GO:0003824//catalytic activity;GO:0046914//transition metal ion binding	GO:0008152//metabolic process	gi|255040359|gb|ACT99992.1|/1.32763e-166/gibberellin 2-oxidase [Malus x domestica]
Pbr025889.1	537	632	83	222.732	30.7456	-2.85685	Down	7.86418e-100	5.27673e-98	K12134|1|1e-19|69.3|aly:ARALYDRAFT_904154|circadian clock associated 1;K12133|5|2e-18|64.7|ath:AT1G01060|LATE ELONGATED HYPOCOTYL	GO:0043231//intracellular membrane-bounded organelle	GO:0001071//nucleic acid binding transcription factor activity;GO:0043565//sequence-specific DNA binding;GO:0005515//protein binding	GO:0010038//response to metal ion;GO:0043393//regulation of protein binding;GO:0009725//response to hormone stimulus;GO:0007623//circadian rhythm;GO:0006970//response to osmotic stress;GO:0043392//negative regulation of DNA binding;GO:0006351//transcription, DNA-dependent;GO:0048571//long-day photoperiodism	gi|291197512|emb|CAZ68125.1|/9.61965e-19/putative CCA1 protein [Arabidopsis halleri subsp. halleri]
Pbr020613.1	2013	38	5	3.57255	0.494089	-2.85411	Down	3.25576e-07	2.16014e-06	K15404|1|0.0|909|pop:POPTR_732680|aldehyde decarbonylase [EC:4.1.99.5]	GO:0016020//membrane	GO:0016830//carbon-carbon lyase activity	GO:0006633//fatty acid biosynthetic process;GO:0007275//multicellular organismal development;GO:0006081//cellular aldehyde metabolic process	gi|224129430|ref|XP_002320584.1|/0/predicted protein [Populus trichocarpa]
Pbr006876.1	930	76	10	15.4657	2.13893	-2.85411	Down	3.0798e-13	3.43852e-12	-	-	-	GO:0010876	gi|148807183|gb|ABR13301.1|/1.62451e-41/putative proline-rich cell wall protein [Prunus dulcis]
Pbr016858.2	1287	243	32	35.7328	4.94596	-2.85293	Down	2.59484e-39	7.20147e-38	-	GO:0031224//intrinsic to membrane	-	-	gi|255569424|ref|XP_002525679.1|/3.1834e-148/gd2b, putative [Ricinus communis]
Pbr039222.1	2850	212	28	14.0776	1.95431	-2.84868	Down	1.94773e-34	4.81798e-33	K13457|1|8e-167|586|pop:POPTR_755797|disease resistance protein RPM1	-	GO:0032559	GO:0012501//programmed cell death;GO:0006950//response to stress	gi|224138292|ref|XP_002326566.1|/0/nbs-lrr resistance protein [Populus trichocarpa]
Pbr019280.1	630	2337	309	702.033	97.5657	-2.84709	Down	0	0	K13448|1|8e-19|91.7|aly:ARALYDRAFT_887792|calcium-binding protein CML	-	GO:0005488//binding	-	gi|224141003|ref|XP_002323865.1|/8.15756e-42/predicted protein [Populus trichocarpa]
Pbr017058.1	1617	68	9	7.95862	1.10716	-2.84565	Down	6.05524e-12	6.15417e-11	-	-	-	-	gi|255545349|ref|XP_002513735.1|/6.24085e-80/conserved hypothetical protein [Ricinus communis]
Pbr024635.1	1644	83	11	9.55466	1.33098	-2.84372	Down	2.7243e-14	3.24457e-13	K01904|1|0.0|931|rcu:RCOM_0246200|4-coumarate--CoA ligase [EC:6.2.1.12]	-	GO:0016405//CoA-ligase activity;GO:0016703;GO:0032559	GO:0006725//cellular aromatic compound metabolic process	gi|294516918|gb|ADE96996.1|/0/p-coumarate:CoA-ligase 2 [Sorbus aucuparia]
Pbr009495.1	1452	1422	190	185.341	26.0295	-2.83196	Down	2.28076e-220	3.46029e-218	-	-	-	GO:0042742//defense response to bacterium;GO:0010033//response to organic substance	gi|255571859|ref|XP_002526872.1|/0/conserved hypothetical protein [Ricinus communis]
Pbr036707.1	2991	142	19	8.98485	1.26362	-2.82993	Down	2.17256e-23	3.90846e-22	K13418|1|2e-67|256|vvi:100247683|somatic embryogenesis receptor kinase 1 [EC:2.7.10.1 2.7.11.1]	GO:0016020//membrane	GO:0004672//protein kinase activity;GO:0032559	GO:0006464//cellular protein modification process	gi|225461770|ref|XP_002283521.1|/0/PREDICTED: probable LRR receptor-like serine/threonine-protein kinase At1g53430-like [Vitis vinifera]
Pbr040632.1	486	97	13	37.7724	5.32092	-2.82759	Down	2.1509e-16	2.88643e-15	-	-	-	-	gi|359492891|ref|XP_002284055.2|/6.07734e-20/PREDICTED: uncharacterized protein LOC100245494 [Vitis vinifera]
Pbr034353.1	618	97	13	29.7045	4.18441	-2.82759	Down	2.1509e-16	2.88785e-15	-	-	-	-	gi|302143750|emb|CBI22611.3|/4.01675e-30/unnamed protein product [Vitis vinifera]
Pbr000971.1	678	746	100	208.232	29.3393	-2.82729	Down	2.8531e-116	2.23895e-114	K13448|1|9e-78|287|vvi:100254364|calcium-binding protein CML	-	GO:0046872//metal ion binding	GO:0008152//metabolic process	gi|28301674|emb|CAB63264.3|/2.08078e-81/calcium-binding protein [Lotus japonicus]
Pbr012310.1	735	67	9	17.2515	2.43576	-2.82428	Down	1.04754e-11	1.04521e-10	K09422|1|5e-46|182|ath:AT4G37260|myb proto-oncogene protein, plant	-	-	-	gi|327412631|emb|CCA29104.1|/1.68044e-74/putative MYB transcription factor [Rosa rugosa]
Pbr003247.1	309	3253	437	1992.35	281.321	-2.82418	Down	0	0	-	-	-	-	gi|255564208|ref|XP_002523101.1|/2.51444e-18/Indole-3-acetic acid-induced protein ARG2, putative [Ricinus communis]
Pbr024998.1	471	119	16	47.8151	6.75738	-2.82293	Down	8.90202e-20	1.38128e-18	K13993|1|3e-59|224|pop:POPTR_832078|HSP20 family protein	-	-	-	gi|259123935|gb|ACV93250.1|/7.22061e-60/CII small heat shock protein 1 [Prunus salicina]
Pbr034315.1	600	52	7	16.4018	2.32074	-2.8212	Down	2.38612e-09	1.98123e-08	K11982|1|2e-11|67.0|bdi:100833984|E3 ubiquitin-protein ligase RNF115/126 [EC:6.3.2.19]	-	-	-	gi|225463022|ref|XP_002266038.1|/3.19785e-53/PREDICTED: E3 ubiquitin-protein ligase arkadia-like isoform 1 [Vitis vinifera]
Pbr030223.1	2247	245	33	20.6349	2.92139	-2.82036	Down	3.60186e-39	9.96588e-38	K04733|1|2e-53|209|smo:SELMODRAFT_159261|interleukin-1 receptor-associated kinase 4 [EC:2.7.11.1];K13430|3|3e-51|201|zma:100283091|serine/threonine-protein kinase PBS1 [EC:2.7.11.1]	-	GO:0005488//binding;GO:0004672//protein kinase activity	-	gi|225470605|ref|XP_002262748.1|/4.5451e-154/PREDICTED: L-type lectin-domain containing receptor kinase IX.1-like [Vitis vinifera]
Pbr009750.1	1050	89	12	16.0413	2.27338	-2.81888	Down	4.17478e-15	5.22977e-14	K01058|1|3e-77|286|mtr:MTR_7g081620|phospholipase A1 [EC:3.1.1.32]	GO:0009536//plastid	GO:0004091//carboxylesterase activity	GO:0044238//primary metabolic process	gi|147799455|emb|CAN77244.1|/3.95574e-143/hypothetical protein VITISV_035465 [Vitis vinifera]
Pbr034020.1	987	1312	177	251.568	35.6727	-2.81806	Down	2.00584e-202	2.6591e-200	-	-	-	-	gi|255548209|ref|XP_002515161.1|/1.14424e-56/conserved hypothetical protein [Ricinus communis]
Pbr033985.1	963	37	5	7.27134	1.03282	-2.81564	Down	5.65166e-07	3.64184e-06	-	-	-	-	gi|225435076|ref|XP_002284421.1|/2.44378e-96/PREDICTED: uncharacterized protein LOC100244942 [Vitis vinifera]
Pbr016805.1	1662	96	13	10.9315	1.55594	-2.81264	Down	3.71156e-16	4.91557e-15	-	-	GO:0003677//DNA binding	GO:0006351//transcription, DNA-dependent;GO:0006950//response to stress;GO:0009743//response to carbohydrate stimulus	gi|359481977|ref|XP_002277338.2|/1.5718e-137/PREDICTED: heat stress transcription factor A-3-like [Vitis vinifera]
Pbr040481.1	1425	2417	328	320.997	45.7866	-2.80956	Down	0	0	-	-	-	-	gi|382948199|gb|AFG33214.1|/2.76989e-55/dehydrin 4 [Malus x domestica]
Pbr013826.1	1305	88	12	12.7618	1.82915	-2.80258	Down	7.20064e-15	8.89382e-14	K06685|1|2e-24|111|ath:AT4G19050|maintenance of ploidy protein MOB1 (MPS1 binder 1)	-	-	-	gi|296089409|emb|CBI39228.3|/7.0998e-71/unnamed protein product [Vitis vinifera]
Pbr019457.1	3228	22	3	1.28982	0.18487	-2.80258	Down	0.000144585	0.000659177	K13420|1|6e-65|248|ath:AT5G46330|LRR receptor-like serine/threonine-protein kinase FLS2 [EC:2.7.11.1]	-	-	-	gi|359481298|ref|XP_003632604.1|/0/PREDICTED: LRR receptor-like serine/threonine-protein kinase GSO2-like [Vitis vinifera]
Pbr033313.1	783	124	17	29.9708	4.31883	-2.79485	Down	2.36938e-20	3.75539e-19	-	GO:0005618//cell wall	-	GO:0000902//cell morphogenesis;GO:0009827//plant-type cell wall modification;GO:0000003//reproduction	gi|255587002|ref|XP_002534094.1|/2.19372e-107/Beta-expansin 1a precursor, putative [Ricinus communis]
Pbr027961.1	1992	29	4	2.75517	0.399439	-2.78609	Down	1.17407e-05	6.36667e-05	K11717|1|9e-07|53.9|smo:SELMODRAFT_176815|cysteine desulfurase / selenocysteine lyase [EC:2.8.1.7 4.4.1.16]	-	GO:0048037//cofactor binding;GO:0016783//sulfurtransferase activity	-	gi|359477024|ref|XP_002274757.2|/0/PREDICTED: probable cysteine desulfurase-like [Vitis vinifera]
Pbr020316.1	1839	29	4	2.98439	0.432671	-2.78609	Down	1.17407e-05	6.36794e-05	K13418|1|8e-50|196|vvi:100247683|somatic embryogenesis receptor kinase 1 [EC:2.7.10.1 2.7.11.1];K13416|4|4e-48|191|ath:AT4G33430|brassinosteroid insensitive 1-associated receptor kinase 1 [EC:2.7.10.1 2.7.11.1]	-	GO:0004672//protein kinase activity;GO:0000166//nucleotide binding	-	gi|356529560|ref|XP_003533358.1|/0/PREDICTED: probable receptor-like protein kinase At1g67000-like [Glycine max]
Pbr033548.2	1332	152	21	21.5963	3.13613	-2.78372	Down	1.54996e-24	2.87357e-23	-	GO:0005618//cell wall	-	GO:0009725//response to hormone stimulus	gi|255545766|ref|XP_002513943.1|/4.00034e-77/conserved hypothetical protein [Ricinus communis]
Pbr008341.1	597	65	9	20.6053	2.9988	-2.78056	Down	3.1197e-11	3.02006e-10	K09872|1|5e-101|364|rcu:RCOM_1356060|aquaporin PIP	GO:0031224//intrinsic to membrane	-	GO:0006810//transport	gi|255045893|gb|ACU00103.1|/3.11566e-101/plasma membrane intrinsic protein PIP2.1 [Populus trichocarpa x Populus deltoides]
Pbr041477.1	1473	683	95	87.752	12.8292	-2.774	Down	1.66142e-104	1.16637e-102	-	-	-	GO:0000741//karyogamy;GO:0009743//response to carbohydrate stimulus	gi|225444875|ref|XP_002279373.1|/1.48028e-160/PREDICTED: uncharacterized protein LOC100256072 [Vitis vinifera]
Pbr013540.2	1464	165	23	21.3296	3.12512	-2.77087	Down	2.16622e-26	4.30235e-25	-	-	-	-	gi|399920194|gb|AFP55541.1|/0/major facilitator superfamily domain [Rosa rugosa]
Pbr032941.1	1080	215	30	37.675	5.52557	-2.76941	Down	6.28812e-34	1.53873e-32	K00852|1|2e-09|62.0|aly:ARALYDRAFT_312683|ribokinase [EC:2.7.1.15]	GO:0009536//plastid	GO:0005488//binding;GO:0016773//phosphotransferase activity, alcohol group as acceptor	GO:0019321//pentose metabolic process;GO:0006796//phosphate-containing compound metabolic process	gi|225437922|ref|XP_002268232.1|/1.78092e-138/PREDICTED: ribokinase [Vitis vinifera]
Pbr002379.1	1680	179	25	20.1643	2.96013	-2.76807	Down	1.76865e-28	3.7471e-27	K00924|1|4e-30|131|aly:ARALYDRAFT_489138|[EC:2.7.1.-]	GO:0031410//cytoplasmic vesicle	GO:0004175//endopeptidase activity	GO:0019538//protein metabolic process	gi|255558694|ref|XP_002520371.1|/0/basic 7S globulin 2 precursor small subunit, putative [Ricinus communis]
Pbr032373.1	1323	1302	182	186.247	27.3647	-2.76683	Down	4.75144e-197	6.12062e-195	K14489|1|3e-09|61.6|vvi:100263145|arabidopsis histidine kinase 2/3/4 (cytokinin receptor) [EC:2.7.13.3]	GO:0030312//external encapsulating structure	GO:0016798//hydrolase activity, acting on glycosyl bonds	-	gi|222139398|gb|ACM45718.1|/0/endo-1,3-beta-glucanase [Pyrus pyrifolia]
Pbr019859.1	1536	107	15	13.1835	1.94258	-2.76269	Down	1.50256e-17	2.13161e-16	K00517|1|1e-161|567|osa:4341325|[EC:1.14.-.-];K15747|5|2e-24|112|ota:Ot13g02550|cytochrome P450, family 97, subfamily A (beta-ring hydroxylase) [EC:1.14.-.-]	-	GO:0016712//oxidoreductase activity, acting on paired donors, with incorporation or reduction of molecular oxygen, reduced flavin or flavoprotein as one donor, and incorporation of one atom of oxygen;GO:0005506//iron ion binding	GO:0060918//auxin transport;GO:0009813//flavonoid biosynthetic process;GO:0009933//meristem structural organization;GO:0010346;GO:0016109	gi|255550067|ref|XP_002516084.1|/0/cytochrome P450, putative [Ricinus communis]
Pbr000268.1	1044	107	15	19.3965	2.85805	-2.76269	Down	1.50256e-17	2.1305e-16	K09422|1|1e-108|391|vvi:100245492|myb proto-oncogene protein, plant	-	-	GO:0009725//response to hormone stimulus;GO:0006970//response to osmotic stress	gi|302398945|gb|ADL36767.1|/1.05541e-180/MYB domain class transcription factor [Malus x domestica]
Pbr020308.1	1470	1794	252	230.964	34.1006	-2.7598	Down	4.67356e-270	8.80209e-268	K02183|1|4e-96|350|vvi:100264980|calmodulin	-	-	-	gi|357521187|ref|XP_003630882.1|/1.63972e-143/hypothetical protein MTR_8g104510 [Medicago truncatula]
Pbr028747.1	1530	64	9	7.9164	1.17012	-2.75819	Down	5.36998e-11	5.10971e-10	K15639|1|3e-102|370|ath:AT2G26710|cytochrome P450, family 734, subfamily A, polypeptide 1 (PHYB activation tagged suppressor 1) [EC:1.14.-.-];K10717|3|1e-80|298|aly:ARALYDRAFT_494132|cytokinin trans-hydroxylase	-	GO:0016491//oxidoreductase activity;GO:0005506//iron ion binding	-	gi|224111860|ref|XP_002316006.1|/9.75716e-163/predicted protein [Populus trichocarpa]
Pbr009902.1	1632	298	42	34.5569	5.11928	-2.75496	Down	3.447e-46	1.12601e-44	K02492|1|0.0|723|vvi:100259052|glutamyl-tRNA reductase [EC:1.2.1.70]	GO:0009536//plastid	GO:0016620//oxidoreductase activity, acting on the aldehyde or oxo group of donors, NAD or NADP as acceptor;GO:0016616//oxidoreductase activity, acting on the CH-OH group of donors, NAD or NADP as acceptor;GO:0000166//nucleotide binding	GO:0009314//response to radiation;GO:0006779//porphyrin-containing compound biosynthetic process	gi|225458990|ref|XP_002285583.1|/0/PREDICTED: glutamyl-tRNA reductase 1, chloroplastic [Vitis vinifera]
Pbr039649.1	822	234	33	53.8745	7.98586	-2.75408	Down	1.38175e-36	3.61439e-35	K01695|1|2e-110|396|vvi:100252844|tryptophan synthase alpha chain [EC:4.2.1.20]	GO:0009532//plastid stroma;GO:0042579//microbody	GO:0046872//metal ion binding;GO:0016836//hydro-lyase activity	GO:0052482;GO:0006568//tryptophan metabolic process	gi|147771784|emb|CAN60260.1|/3.90977e-110/hypothetical protein VITISV_007742 [Vitis vinifera]
Pbr007316.1	624	163	23	49.4359	7.332	-2.75328	Down	6.37146e-26	1.23842e-24	-	-	-	-	gi|388510458|gb|AFK43295.1|/4.86394e-23/unknown [Medicago truncatula]
Pbr017951.1	2070	205	29	18.7423	2.78681	-2.74961	Down	3.49106e-32	8.22583e-31	K00278|1|0.0|1023|vvi:100242339|L-aspartate oxidase [EC:1.4.3.16]	GO:0009536//plastid	GO:0015922	GO:0019359	gi|225452458|ref|XP_002274361.1|/0/PREDICTED: L-aspartate oxidase 1-like [Vitis vinifera]
Pbr020059.1	1611	641	91	75.3011	11.2363	-2.7445	Down	4.36174e-97	2.80931e-95	K01723|1|0.0|742|vvi:100267750|hydroperoxide dehydratase [EC:4.2.1.92]	-	GO:0016491//oxidoreductase activity;GO:0005506//iron ion binding;GO:0016836//hydro-lyase activity	-	gi|83404758|gb|ABC17856.1|/0/allene oxide synthase protein [Lonicera japonica]
Pbr030592.1	1185	612	87	97.74	14.6043	-2.74256	Down	1.05603e-92	6.50997e-91	-	-	-	-	gi|255561705|ref|XP_002521862.1|/1.47183e-96/conserved hypothetical protein [Ricinus communis]
Pbr014667.1	582	10755	1532	3497.25	523.619	-2.73963	Down	0	0	-	-	-	GO:0006950//response to stress;GO:0009628//response to abiotic stimulus	gi|380504946|gb|AFD62760.1|/2.59894e-49/ELIP, partial [Citrus sinensis]
Pbr042353.1	1446	694	99	90.8302	13.619	-2.73755	Down	1.08887e-104	7.66393e-103	K14500|1|7e-157|551|vvi:100249852|BR-signaling kinase [EC:2.7.11.1]	GO:0016020//membrane	GO:0005488//binding;GO:0016301//kinase activity	-	gi|255558866|ref|XP_002520456.1|/2.64325e-170/receptor protein kinase, putative [Ricinus communis]
Pbr029972.1	1152	1352	193	222.108	33.3261	-2.73653	Down	3.70134e-202	4.88309e-200	-	-	GO:0005488//binding	GO:0009725//response to hormone stimulus	gi|225423460|ref|XP_002274025.1|/6.64104e-78/PREDICTED: ninja-family protein AFP1 [Vitis vinifera]
Pbr018850.1	582	476	68	154.783	23.2416	-2.73547	Down	2.79936e-72	1.33184e-70	-	-	-	GO:0006950//response to stress;GO:0015995//chlorophyll biosynthetic process;GO:0009639//response to red or far red light;GO:0009411//response to UV	gi|380504946|gb|AFD62760.1|/3.07003e-50/ELIP, partial [Citrus sinensis]
Pbr013974.1	4353	35	5	1.52166	0.228487	-2.73547	Down	1.68861e-06	1.03118e-05	-	-	-	GO:0007131//reciprocal meiotic recombination	gi|224120016|ref|XP_002318221.1|/0/predicted protein [Populus trichocarpa]
Pbr006763.1	1392	126	18	17.1305	2.57225	-2.73547	Down	3.16658e-20	4.99573e-19	K00924|1|8e-97|352|ath:AT4G35600|[EC:2.7.1.-];K05658|5|2e-94|344|vvi:100262734|ATP-binding cassette, subfamily B (MDR/TAP), member 1	GO:0043231//intracellular membrane-bounded organelle	GO:0004702//receptor signaling protein serine/threonine kinase activity;GO:0032559	GO:0006464//cellular protein modification process	gi|255539232|ref|XP_002510681.1|/8.74494e-123/serine/threonine-protein kinase cx32, putative [Ricinus communis]
Pbr025077.1	585	49	7	15.8518	2.38024	-2.73547	Down	1.22451e-08	9.49194e-08	-	-	-	-	gi|359480457|ref|XP_002265331.2|/1.61208e-14/PREDICTED: probable disease resistance protein At5g66900-like [Vitis vinifera]
Pbr024234.1	1749	28	4	3.02975	0.454935	-2.73547	Down	2.0312e-05	0.000106632	K14494|1|4e-58|224|pop:POPTR_719856|DELLA protein	-	-	-	gi|224126261|ref|XP_002319796.1|/0/GRAS family transcription factor [Populus trichocarpa]
Pbr037378.1	1530	630	90	77.927	11.7012	-2.73547	Down	4.0596e-95	2.56036e-93	K01051|1|0.0|733|pop:POPTR_589361|pectinesterase [EC:3.1.1.11]	GO:0005618//cell wall	GO:0030234//enzyme regulator activity;GO:0004091//carboxylesterase activity	GO:0071555//cell wall organization;GO:0045229//external encapsulating structure organization	gi|119507467|dbj|BAF42041.1|/0/pectin methylesterase 4 [Pyrus communis]
Pbr018036.1	741	42	6	10.7268	1.61069	-2.73547	Down	1.42897e-07	9.92719e-07	K12135|1|2e-07|54.3|ath:AT5G15840|zinc finger protein CONSTANS	GO:0044464//cell part	GO:0046914//transition metal ion binding	-	gi|302398755|gb|ADL36672.1|/2.99282e-95/COL domain class transcription factor [Malus x domestica]
Pbr009405.1	1680	78945	11380	8893.13	1347.45	-2.72246	Down	0	0	K03064|1|8e-06|50.4|smo:SELMODRAFT_157152|26S proteasome regulatory subunit T4	GO:0009532//plastid stroma	GO:0032559	-	gi|3914605|sp|Q40281.1|RCA_MALDO/0/RecName: Full=Ribulose bisphosphate carboxylase/oxygenase activase, chloroplastic; Short=RA; Short=RuBisCO activase; Flags: Precursor
Pbr040616.1	993	83	12	15.8186	2.40387	-2.71819	Down	1.07766e-13	1.23811e-12	-	-	-	-	gi|255545766|ref|XP_002513943.1|/2.12904e-135/conserved hypothetical protein [Ricinus communis]
Pbr012485.1	1005	55	8	10.357	1.58345	-2.70947	Down	1.81752e-09	1.52581e-08	K15015|1|3e-14|77.4|pop:POPTR_576813|solute carrier family 32 (vesicular inhibitory amino acid transporter);K14209|5|4e-13|73.9|ppp:PHYPADRAFT_115714|solute carrier family 36 (proton-coupled amino acid transporter)	GO:0031224//intrinsic to membrane	GO:0005275//amine transmembrane transporter activity	GO:0009628//response to abiotic stimulus;GO:0006865//amino acid transport	gi|225452181|ref|XP_002265308.1|/5.67141e-160/PREDICTED: lysine histidine transporter 1 [Vitis vinifera]
Pbr004660.2	399	96	14	45.5342	6.97966	-2.70572	Down	1.45247e-15	1.857e-14	-	GO:0016020//membrane	-	-	gi|255575997|ref|XP_002528894.1|/8.25683e-46/conserved hypothetical protein [Ricinus communis]
Pbr025794.1	1398	48	7	6.4979	0.996025	-2.70572	Down	2.10272e-08	1.59509e-07	K06685|1|1e-12|73.2|ath:AT4G19050|maintenance of ploidy protein MOB1 (MPS1 binder 1)	-	-	-	gi|297744796|emb|CBI38064.3|/4.45791e-50/unnamed protein product [Vitis vinifera]
Pbr018564.1	1107	424	62	72.4865	11.141	-2.70184	Down	1.00013e-63	4.16986e-62	-	-	-	-	gi|307136205|gb|ADN34043.1|/3.72789e-22/late embryogenesis abundant protein D-29 [Cucumis melo subsp. melo]
Pbr005262.1	3060	198	29	12.2457	1.88519	-2.69949	Down	1.48587e-30	3.32876e-29	K01537|1|1e-127|456|ath:AT3G63380|Ca2+-transporting ATPase [EC:3.6.3.8]	-	GO:0003824//catalytic activity	-	gi|255581776|ref|XP_002531689.1|/0/cation-transporting atpase plant, putative [Ricinus communis]
Pbr024824.1	2100	307	45	27.6668	4.26258	-2.69835	Down	1.6097e-46	5.28357e-45	K05391|1|0.0|826|osa:4339240|cyclic nucleotide gated channel, other eukaryote	GO:0043231//intracellular membrane-bounded organelle;GO:0016020//membrane	GO:0015075//ion transmembrane transporter activity;GO:0005515//protein binding;GO:0000166//nucleotide binding	GO:0033554//cellular response to stress;GO:0006811//ion transport	gi|255569589|ref|XP_002525760.1|/0/Cyclic nucleotide-gated ion channel, putative [Ricinus communis]
Pbr010823.1	744	1260	185	320.506	49.4627	-2.69594	Down	1.59786e-185	1.92228e-183	-	-	-	-	gi|255545114|ref|XP_002513618.1|/4.44752e-22/conserved hypothetical protein [Ricinus communis]
Pbr019875.1	1512	34	5	4.25565	0.657806	-2.69365	Down	2.9056e-06	1.72124e-05	K08790|1|0.0|672|ppp:PHYPADRAFT_131231|serine/threonine kinase 38 [EC:2.7.11.1];K08286|5|0.0|645|osa:4339288|protein-serine/threonine kinase [EC:2.7.11.-]	-	GO:0004674//protein serine/threonine kinase activity;GO:0032559	GO:0006464//cellular protein modification process	gi|359476253|ref|XP_002280119.2|/0/PREDICTED: serine/threonine-protein kinase CBK1 [Vitis vinifera]
Pbr016361.1	2226	68	10	5.78126	0.893623	-2.69365	Down	2.37234e-11	2.31132e-10	K02977|1|5e-25|114|mtr:MTR_5g033960|small subunit ribosomal protein S27Ae	GO:0043234//protein complex	GO:0019787//small conjugating protein ligase activity	GO:0032446//protein modification by small protein conjugation	gi|224104841|ref|XP_002313587.1|/0/predicted protein [Populus trichocarpa]
Pbr020062.1	1569	136	20	16.4042	2.53563	-2.69365	Down	2.17864e-21	3.61022e-20	K11968|1|7e-158|555|gmx:100793295|ariadne-1	-	GO:0005488//binding	GO:0032446//protein modification by small protein conjugation	gi|359495753|ref|XP_002268068.2|/1.66688e-157/PREDICTED: probable E3 ubiquitin-protein ligase ARI8-like [Vitis vinifera]
Pbr010234.1	2862	230	34	15.2089	2.36314	-2.68614	Down	4.52394e-35	1.13552e-33	K13420|1|4e-81|301|sbi:SORBI_06g028760|LRR receptor-like serine/threonine-protein kinase FLS2 [EC:2.7.11.1]	-	-	-	gi|359488583|ref|XP_003633782.1|/0/PREDICTED: LRR receptor-like serine/threonine-protein kinase FLS2-like [Vitis vinifera]
Pbr000224.1	1689	54	8	6.05067	0.942193	-2.683	Down	3.11246e-09	2.55787e-08	K15086|1|2e-168|590|rcu:RCOM_0906740|(3S)-linalool synthase [EC:4.2.3.25]	-	-	-	gi|332319701|sp|P0CV95.1|NES2_FRAAN/0/RecName: Full=(3S,6E)-nerolidol synthase 2, chloroplastic/mitochondrial; Short=FaNES2; Flags: Precursor
Pbr033539.1	777	27	4	6.5763	1.02404	-2.683	Down	3.50106e-05	0.000177649	-	GO:0044464//cell part	-	GO:0007047//cellular cell wall organization	gi|51507371|emb|CAH18933.1|/2.78513e-155/expansin [Pyrus communis]
Pbr025263.1	576	2203	327	723.821	112.929	-2.68022	Down	0	0	-	-	-	-	gi|147810457|emb|CAN69808.1|/5.07706e-66/hypothetical protein VITISV_019656 [Vitis vinifera]
Pbr013669.1	630	350	52	105.14	16.4188	-2.67888	Down	2.06526e-52	7.41133e-51	K13448|1|2e-58|223|vvi:100251912|calcium-binding protein CML	-	GO:0046872//metal ion binding	GO:0000904//cell morphogenesis involved in differentiation;GO:0010038//response to metal ion	gi|116643154|gb|ABK06394.1|/2.13679e-58/Ca2+-binding protein [Citrus sinensis]
Pbr027593.1	183	895	133	925.574	144.571	-2.67857	Down	2.1659e-131	1.88371e-129	-	GO:0031224//intrinsic to membrane	-	-	gi|224143520|ref|XP_002324983.1|/3.69732e-14/predicted protein [Populus trichocarpa]
Pbr026555.1	2571	74	11	5.44714	0.851079	-2.67813	Down	3.56602e-12	3.70988e-11	K13420|1|1e-73|276|ath:AT5G46330|LRR receptor-like serine/threonine-protein kinase FLS2 [EC:2.7.11.1]	-	-	-	gi|350284767|gb|AEQ27755.1|/0/receptor-like protein [Malus sieversii]
Pbr008900.1	1920	94	14	9.26543	1.45046	-2.67535	Down	4.23322e-15	5.30055e-14	-	-	-	-	gi|255552217|ref|XP_002517153.1|/0/conserved hypothetical protein [Ricinus communis]
Pbr014895.1	891	208	31	44.1799	6.92091	-2.67436	Down	1.02837e-31	2.37797e-30	K05283|1|7e-15|79.3|aly:ARALYDRAFT_354960|phosphatidylinositol glycan, class W [EC:2.3.-.-];K11982|2|7e-08|56.2|bdi:100833984|E3 ubiquitin-protein ligase RNF115/126 [EC:6.3.2.19];K13148|3|3e-07|54.3|vvi:100261060|integrator complex subunit 11 [EC:3.1.27.-];K15692|5|3e-07|53.9|smo:SELMODRAFT_66937|E3 ubiquitin-protein ligase RNF13 [EC:6.3.2.19]	-	-	GO:0009743//response to carbohydrate stimulus;GO:0006950//response to stress	gi|255551823|ref|XP_002516957.1|/1.04438e-50/ring finger protein, putative [Ricinus communis]
Pbr008628.1	1194	1286	192	203.834	31.9872	-2.67182	Down	1.7827e-187	2.18312e-185	K01090|1|1e-122|437|osa:4337723|protein phosphatase [EC:3.1.3.16]	GO:0043234//protein complex	GO:0004721//phosphoprotein phosphatase activity;GO:0043169//cation binding	GO:0006464//cellular protein modification process	gi|356534653|ref|XP_003535867.1|/6.54241e-169/PREDICTED: probable protein phosphatase 2C 49-like [Glycine max]
Pbr032288.1	2451	227	34	17.5276	2.7594	-2.6672	Down	2.22814e-34	5.50663e-33	K04733|1|7e-121|433|ath:AT5G38990|interleukin-1 receptor-associated kinase 4 [EC:2.7.11.1];K00924|3|4e-58|224|osa:4333525|[EC:2.7.1.-]	GO:0016020//membrane	GO:0004672//protein kinase activity	GO:0043401//steroid hormone mediated signaling pathway;GO:0001558//regulation of cell growth;GO:0000902//cell morphogenesis;GO:0007275//multicellular organismal development	gi|224109624|ref|XP_002315260.1|/0/predicted protein [Populus trichocarpa]
Pbr022368.1	2193	5856	878	505.361	79.6407	-2.66574	Down	0	0	K01583|1|0.0|1050|vvi:100233080|arginine decarboxylase [EC:4.1.1.19]	-	GO:0016831//carboxy-lyase activity	GO:0006525//arginine metabolic process;GO:0006596//polyamine biosynthetic process	gi|56377971|dbj|BAD74163.1|/0/arginine decarboxylase [Malus x domestica]
Pbr018625.1	498	100	15	38.0023	5.99158	-2.66508	Down	6.42814e-16	8.41141e-15	-	-	GO:0003824//catalytic activity	-	gi|225425306|ref|XP_002273187.1|/1.27009e-55/PREDICTED: nudix hydrolase 13, mitochondrial-like [Vitis vinifera]
Pbr029600.1	2151	140	21	12.3176	1.94204	-2.66508	Down	9.6933e-22	1.63303e-20	K04733|1|2e-56|219|smo:SELMODRAFT_159261|interleukin-1 receptor-associated kinase 4 [EC:2.7.11.1];K00924|3|7e-54|210|aly:ARALYDRAFT_475717|[EC:2.7.1.-]	-	GO:0004672//protein kinase activity	-	gi|255541802|ref|XP_002511965.1|/5.97207e-180/kinase, putative [Ricinus communis]
Pbr033675.2	645	60	9	17.6048	2.77563	-2.66508	Down	4.6293e-10	4.08207e-09	-	GO:0031225//anchored to membrane	GO:0005488//binding	GO:0033554//cellular response to stress;GO:0050832//defense response to fungus	gi|86155939|gb|ABC86707.1|/5.38727e-44/non-race specific disease resistance protein 1-like protein b [Coffea arabica]
Pbr040357.1	642	93	14	27.4149	4.33783	-2.65992	Down	7.21294e-15	8.90498e-14	K13464|1|4e-32|135|rcu:RCOM_0684970|jasmonate ZIM domain-containing protein	-	-	-	gi|255576619|ref|XP_002529200.1|/3.96327e-31/conserved hypothetical protein [Ricinus communis]
Pbr003658.1	501	66	10	24.9313	3.97047	-2.65058	Down	6.9129e-11	6.51655e-10	-	-	-	-	-
Pbr040966.1	216	66	10	57.8268	9.20928	-2.65058	Down	6.9129e-11	6.5188e-10	-	-	-	-	-
Pbr019799.2	2232	553	84	46.8889	7.48625	-2.64693	Down	8.3008e-81	4.44483e-79	K03021|1|2e-06|52.8|ota:Ot01g06000|DNA-directed RNA polymerase III subunit RPC2 [EC:2.7.7.6]	GO:0031410//cytoplasmic vesicle	-	-	gi|302142147|emb|CBI19350.3|/0/unnamed protein product [Vitis vinifera]
Pbr009117.1	549	125	19	43.09	6.88431	-2.64597	Down	2.0359e-19	3.11476e-18	K05283|1|7e-10|61.6|aly:ARALYDRAFT_354960|phosphatidylinositol glycan, class W [EC:2.3.-.-];K15692|2|7e-08|55.1|smo:SELMODRAFT_66937|E3 ubiquitin-protein ligase RNF13 [EC:6.3.2.19];K14297|3|1e-07|53.9|mtr:MTR_1g066430|nuclear pore complex protein Nup98-Nup96;K15083|5|6e-07|52.0|olu:OSTLU_36534|DNA repair protein RAD16	GO:0044464//cell part	GO:0046914//transition metal ion binding	GO:0009725//response to hormone stimulus;GO:0009743//response to carbohydrate stimulus	gi|225454353|ref|XP_002278353.1|/1.37112e-62/PREDICTED: E3 ubiquitin-protein ligase RHA1B [Vitis vinifera]
Pbr011128.1	261	171	26	123.992	19.8158	-2.64553	Down	4.85556e-26	9.4986e-25	-	-	-	-	-
Pbr037966.1	3240	46	7	2.6869	0.429766	-2.64432	Down	6.15594e-08	4.4486e-07	K04733|1|2e-55|216|smo:SELMODRAFT_159261|interleukin-1 receptor-associated kinase 4 [EC:2.7.11.1];K13430|4|2e-52|206|zma:100283091|serine/threonine-protein kinase PBS1 [EC:2.7.11.1]	GO:0031410//cytoplasmic vesicle	GO:0004871//signal transducer activity;GO:0004674//protein serine/threonine kinase activity;GO:0000166//nucleotide binding	GO:0009987//cellular process	gi|359482600|ref|XP_003632790.1|/1.83272e-106/PREDICTED: G-type lectin S-receptor-like serine/threonine-protein kinase CES101-like [Vitis vinifera]
Pbr010849.1	396	2384	363	1139.33	182.344	-2.64346	Down	0	0	-	-	GO:0043169//cation binding	GO:0006812//cation transport	gi|255590302|ref|XP_002535232.1|/6.59743e-27/metal ion binding protein, putative [Ricinus communis]
Pbr007870.2	693	59	9	16.1123	2.58338	-2.64083	Down	7.89422e-10	6.8309e-09	K15634|1|4e-72|268|ath:AT3G50520|probable phosphoglycerate mutase [EC:5.4.2.1]	-	GO:0016853//isomerase activity	-	gi|15229783|ref|NP_190621.1|/4.55198e-71/phosphoglycerate mutase [Arabidopsis thaliana]
Pbr027161.1	1125	275	42	46.2615	7.42636	-2.63908	Down	7.2633e-41	2.09013e-39	K13415|1|2e-52|204|sbi:SORBI_03g032990|protein brassinosteroid insensitive 1 [EC:2.7.10.1 2.7.11.1];K04733|4|1e-50|198|smo:SELMODRAFT_159261|interleukin-1 receptor-associated kinase 4 [EC:2.7.11.1]	GO:0044464//cell part	GO:0004672//protein kinase activity;GO:0004871//signal transducer activity;GO:0000166//nucleotide binding	GO:0009555//pollen development;GO:0008152//metabolic process;GO:0001708//cell fate specification	gi|255556534|ref|XP_002519301.1|/6.76982e-120/receptor serine-threonine protein kinase, putative [Ricinus communis]
Pbr012729.1	657	267	41	76.9104	12.4136	-2.63126	Down	1.34932e-39	3.76389e-38	K13993|1|4e-24|109|vvi:100248906|HSP20 family protein	-	-	GO:0010038//response to metal ion	gi|224071519|ref|XP_002303499.1|/1.31962e-37/predicted protein [Populus trichocarpa]
Pbr003363.1	2001	26	4	2.45904	0.397642	-2.62855	Down	6.0108e-05	0.000294385	-	-	-	-	gi|225435735|ref|XP_002283551.1|/0/PREDICTED: uncharacterized protein LOC100250050 [Vitis vinifera]
Pbr022664.1	1275	26	4	3.85924	0.624064	-2.62855	Down	6.0108e-05	0.000294279	-	-	-	-	gi|224128396|ref|XP_002320319.1|/2.96077e-122/predicted protein [Populus trichocarpa]
Pbr002611.1	1209	26	4	4.06992	0.658132	-2.62855	Down	6.0108e-05	0.000294332	-	-	GO:0003824//catalytic activity	-	gi|255561848|ref|XP_002521933.1|/1.25944e-159/carboxylesterase np, putative [Ricinus communis]
Pbr025080.1	3246	130	20	7.57938	1.22563	-2.62855	Down	5.27762e-20	8.26414e-19	K03006|1|3e-18|92.8|smo:SELMODRAFT_128226|DNA-directed RNA polymerase II subunit RPB1 [EC:2.7.7.6]	-	-	-	gi|196166343|gb|ACG70794.1|/2.99934e-141/NB-ARC domain-containing protein [Malus x domestica]
Pbr026247.1	1131	420	65	70.279	11.4322	-2.61999	Down	4.28056e-61	1.71656e-59	K13648|1|1e-24|112|pop:POPTR_661826|alpha-1,4-galacturonosyltransferase [EC:2.4.1.43]	GO:0043231//intracellular membrane-bounded organelle	GO:0008194//UDP-glycosyltransferase activity	-	gi|225452640|ref|XP_002281766.1|/8.02362e-137/PREDICTED: probable galacturonosyltransferase-like 9-like [Vitis vinifera]
Pbr024549.1	1755	909	141	98.0225	15.9816	-2.6167	Down	4.66374e-130	4.0051e-128	K14494|1|0.0|832|rcu:RCOM_0307540|DELLA protein	GO:0043231//intracellular membrane-bounded organelle	-	GO:0010476//gibberellin mediated signaling pathway	gi|372477834|gb|AEX97111.1|/0/spur-type DELLA protein [Malus x domestica]
Pbr024097.1	3090	366	57	22.4162	3.66941	-2.61092	Down	3.00428e-53	1.09538e-51	K00924|1|4e-148|524|aly:ARALYDRAFT_473063|[EC:2.7.1.-];K13420|3|3e-144|511|vvi:100253808|LRR receptor-like serine/threonine-protein kinase FLS2 [EC:2.7.11.1]	GO:0016020//membrane	GO:0004672//protein kinase activity;GO:0004872//receptor activity;GO:0016491//oxidoreductase activity;GO:0032559	GO:0006952//defense response;GO:0009719;GO:0006464//cellular protein modification process	gi|224100529|ref|XP_002311912.1|/0/predicted protein [Populus trichocarpa]
Pbr010344.1	759	77	12	19.1994	3.14499	-2.60994	Down	2.64268e-12	2.7736e-11	-	-	-	-	gi|359481652|ref|XP_003632656.1|/2.75195e-43/PREDICTED: uncharacterized protein LOC100854478 [Vitis vinifera]
Pbr033942.1	249	205	32	155.809	25.5641	-2.60759	Down	1.84228e-30	4.11037e-29	-	-	-	-	gi|255578767|ref|XP_002530241.1|/1.37325e-08/conserved hypothetical protein [Ricinus communis]
Pbr025842.1	2226	32	5	2.7206	0.446811	-2.60618	Down	8.5187e-06	4.71976e-05	K13420|1|2e-66|252|sbi:SORBI_06g028760|LRR receptor-like serine/threonine-protein kinase FLS2 [EC:2.7.11.1]	-	GO:0004872//receptor activity;GO:0016301//kinase activity;GO:0000166//nucleotide binding	GO:0006950//response to stress;GO:0007165//signal transduction;GO:0008152//metabolic process	gi|359482434|ref|XP_002270860.2|/0/PREDICTED: tyrosine-sulfated glycopeptide receptor 1-like [Vitis vinifera]
Pbr022832.1	1341	1780	280	251.206	41.5345	-2.59649	Down	1.01567e-250	1.74447e-248	-	-	GO:0016874//ligase activity	-	gi|224069206|ref|XP_002302926.1|/9.4568e-135/predicted protein [Populus trichocarpa]
Pbr001038.1	2982	394	62	25.005	4.13584	-2.59597	Down	7.63762e-57	2.93769e-55	K01537|1|0.0|1637|vvi:100247373|Ca2+-transporting ATPase [EC:3.6.3.8]	GO:0009532//plastid stroma;GO:0031224//intrinsic to membrane;GO:0009528//plastid inner membrane	GO:0046914//transition metal ion binding;GO:0005515//protein binding;GO:0019829//cation-transporting ATPase activity;GO:0046873//metal ion transmembrane transporter activity;GO:0005261//cation channel activity;GO:0032559;GO:0016836//hydro-lyase activity	GO:0006816//calcium ion transport;GO:0010035//response to inorganic substance;GO:0009206	gi|225438996|ref|XP_002284429.1|/0/PREDICTED: calcium-transporting ATPase 2, plasma membrane-type isoform 1 [Vitis vinifera]
Pbr034094.1	738	76	12	19.4893	3.23448	-2.59108	Down	4.47976e-12	4.60089e-11	-	-	-	-	gi|225437316|ref|XP_002263944.1|/3.09415e-68/PREDICTED: stress-related protein-like [Vitis vinifera]
Pbr038060.1	1416	264	42	35.2842	5.90018	-2.58019	Down	2.34364e-38	6.35576e-37	K08900|1|4e-148|523|pop:POPTR_248199|mitochondrial chaperone BCS1	-	GO:0000166//nucleotide binding	-	gi|356572218|ref|XP_003554267.1|/2.49964e-149/PREDICTED: probable mitochondrial chaperone BCS1-B-like [Glycine max]
Pbr000733.1	1380	69	11	9.46257	1.5856	-2.57721	Down	5.06176e-11	4.81979e-10	-	-	GO:0015171//amino acid transmembrane transporter activity	GO:0006810//transport	gi|224057042|ref|XP_002299116.1|/1.67862e-134/neutral amino acid transport protein [Populus trichocarpa]
Pbr000070.1	1131	25	4	4.18328	0.70352	-2.57197	Down	0.000102763	0.000481036	-	GO:0016020//membrane	GO:0016740//transferase activity	-	gi|224058561|ref|XP_002299545.1|/1.99934e-95/predicted protein [Populus trichocarpa]
Pbr001596.1	1518	50	8	6.23358	1.04833	-2.57197	Down	2.61758e-08	1.96275e-07	K01362|1|7e-14|77.0|cme:CMD006C|[EC:3.4.21.-];K14810|4|7e-10|63.9|ota:Ot01g04880|ATP-dependent RNA helicase DDX56/DBP9 [EC:3.6.4.13]	GO:0009536//plastid;GO:0031981//nuclear lumen	GO:0004175//endopeptidase activity;GO:0016628//oxidoreductase activity, acting on the CH-CH group of donors, NAD or NADP as acceptor	GO:0019538//protein metabolic process	gi|356495905|ref|XP_003516811.1|/0/PREDICTED: protease Do-like 9-like [Glycine max]
Pbr010918.1	1125	106	17	17.8317	3.00591	-2.56857	Down	3.51536e-16	4.66024e-15	K01090|1|6e-87|319|sbi:SORBI_01g038410|protein phosphatase [EC:3.1.3.16];K14497|2|3e-38|157|bdi:100838998|protein phosphatase 2C [EC:3.1.3.16]	-	GO:0016787//hydrolase activity	-	gi|359486495|ref|XP_002272594.2|/4.85158e-118/PREDICTED: probable protein phosphatase 2C 25-like [Vitis vinifera]
Pbr039358.1	1017	380	61	70.7134	11.9313	-2.56723	Down	3.21444e-54	1.18786e-52	-	-	-	-	gi|224085053|ref|XP_002307472.1|/1.03918e-92/predicted protein [Populus trichocarpa]
Pbr011856.1	561	56	9	18.8914	3.19124	-2.56554	Down	3.86598e-09	3.14964e-08	K00676|1|1e-14|77.8|ppp:PHYPADRAFT_104139|ribosomal-protein-alanine N-acetyltransferase [EC:2.3.1.128]	-	GO:0016407//acetyltransferase activity	GO:0009725//response to hormone stimulus	gi|225432712|ref|XP_002282836.1|/6.50699e-71/PREDICTED: uncharacterized N-acetyltransferase p20 [Vitis vinifera]
Pbr019906.1	1503	62	10	7.80678	1.32349	-2.56038	Down	5.73984e-10	5.02241e-09	K15639|1|5e-114|409|aly:ARALYDRAFT_901457|cytochrome P450, family 734, subfamily A, polypeptide 1 (PHYB activation tagged suppressor 1) [EC:1.14.-.-];K15638|3|5e-93|340|ath:AT1G17060|cytochrome P450, family 72, subfamily C, polypeptide 1;K10717|5|1e-81|302|aly:ARALYDRAFT_494132|cytokinin trans-hydroxylase	-	GO:0016491//oxidoreductase activity;GO:0005506//iron ion binding	GO:0008152//metabolic process	gi|225429670|ref|XP_002281332.1|/0/PREDICTED: secologanin synthase [Vitis vinifera]
Pbr000472.1	1086	210	34	36.5956	6.22771	-2.5549	Down	1.69332e-30	3.78421e-29	-	GO:0044464//cell part	-	-	gi|224114702|ref|XP_002316834.1|/2.32949e-162/predicted protein [Populus trichocarpa]
Pbr017597.1	2205	740	120	63.5129	10.8256	-2.5526	Down	2.4688e-103	1.70685e-101	-	GO:0044464//cell part	GO:0015197//peptide transporter activity	GO:0006810//transport;GO:0030003//cellular cation homeostasis	gi|320097186|gb|ADW09325.1|/0/oligopeptide transporter 3 [Noccaea caerulescens]
Pbr016655.1	1341	74	12	10.4434	1.78005	-2.5526	Down	1.28083e-11	1.27332e-10	K09561|1|8e-07|53.5|sbi:SORBI_07g001340|STIP1 homology and U-box containing protein 1 [EC:6.3.2.19];K10597|5|5e-06|50.8|ota:Ot17g01860|ubiquitin conjugation factor E4 B [EC:6.3.2.19]	-	-	-	gi|224069206|ref|XP_002302926.1|/1.84561e-130/predicted protein [Populus trichocarpa]
Pbr000124.1	1398	92	15	12.4543	2.13434	-2.54478	Down	4.36512e-14	5.14045e-13	K11228|1|2e-46|184|ota:Ot13g01170|mitogen-activated protein kinase kinase kinase [EC:2.7.11.1];K13414|2|9e-43|172|aly:ARALYDRAFT_489755|mitogen-activated protein kinase kinase kinase 1, plant [EC:2.7.11.25]	-	GO:0004672//protein kinase activity;GO:0000166//nucleotide binding	-	gi|224118034|ref|XP_002331541.1|/2.66097e-103/predicted protein [Populus trichocarpa]
Pbr042056.1	1620	1061	173	123.948	21.2427	-2.54469	Down	7.2431e-147	6.98946e-145	-	-	GO:0046993;GO:0050662//coenzyme binding	GO:0008152//metabolic process	gi|224061639|ref|XP_002300580.1|/0/predicted protein [Populus trichocarpa]
Pbr025002.1	486	55	9	21.4173	3.68371	-2.53955	Down	6.53642e-09	5.20266e-08	K13424|1|8e-25|110|zma:100279301|WRKY transcription factor 33	-	GO:0005488//binding	GO:0006351//transcription, DNA-dependent;GO:0006952//defense response;GO:0007165//signal transduction	gi|224088782|ref|XP_002308538.1|/4.17951e-45/predicted protein [Populus trichocarpa]
Pbr005873.1	1218	2269	373	352.555	60.9173	-2.53292	Down	0	0	K13535|1|2e-179|626|gmx:100789925|cardiolipin-specific phospholipase [EC:3.1.1.-]	-	GO:0071617//lysophospholipid acyltransferase activity;GO:0004091//carboxylesterase activity	GO:0055088//lipid homeostasis	gi|302142598|emb|CBI19801.3|/0/unnamed protein product [Vitis vinifera]
Pbr036011.1	900	2752	454	578.689	100.344	-2.52783	Down	0	0	K01177|1|7e-159|557|rcu:RCOM_1023980|beta-amylase [EC:3.2.1.2]	GO:0043231//intracellular membrane-bounded organelle;GO:0044444//cytoplasmic part;GO:0016020//membrane	GO:0016772//transferase activity, transferring phosphorus-containing groups;GO:0016160//amylase activity;GO:0005102//receptor binding;GO:0043167//ion binding;GO:0032559	GO:0005982//starch metabolic process;GO:0009933//meristem structural organization;GO:0007167//enzyme linked receptor protein signaling pathway;GO:0010073//meristem maintenance;GO:0003006//developmental process involved in reproduction;GO:0006950//response to stress;GO:0006464//cellular protein modification process	gi|255554312|ref|XP_002518196.1|/7.62708e-158/Beta-amylase, putative [Ricinus communis]
Pbr031694.1	2247	115	19	9.68576	1.68202	-2.52568	Down	3.86972e-17	5.37529e-16	-	GO:0044464//cell part	-	-	gi|225444788|ref|XP_002278293.1|/0/PREDICTED: uncharacterized protein At5g12080-like [Vitis vinifera]
Pbr025890.1	2187	6812	1129	589.474	102.689	-2.52115	Down	0	0	K12133|1|4e-71|268|ath:AT1G01060|LATE ELONGATED HYPOCOTYL;K12134|3|5e-51|201|aly:ARALYDRAFT_904154|circadian clock associated 1	-	-	-	gi|51980218|gb|AAU20773.1|/1.31502e-174/late elongated hypocotyl [Castanea sativa]
Pbr007769.1	1899	144	24	14.3508	2.514	-2.51308	Down	5.33158e-21	8.69774e-20	K13415|1|6e-54|210|sbi:SORBI_03g032990|protein brassinosteroid insensitive 1 [EC:2.7.10.1 2.7.11.1]	GO:0031410//cytoplasmic vesicle;GO:0016020//membrane	GO:0004674//protein serine/threonine kinase activity;GO:0032559	GO:0006952//defense response;GO:0008219//cell death;GO:0007167//enzyme linked receptor protein signaling pathway;GO:0051093//negative regulation of developmental process;GO:0006464//cellular protein modification process	gi|224133744|ref|XP_002321650.1|/0/predicted protein [Populus trichocarpa]
Pbr038909.1	864	24	4	5.25698	0.920928	-2.51308	Down	0.000174903	0.000784691	-	-	GO:0016740//transferase activity	-	gi|297734240|emb|CBI15487.3|/1.71053e-42/unnamed protein product [Vitis vinifera]
Pbr036458.1	2826	432	72	28.9301	5.06804	-2.51308	Down	5.51922e-60	2.18125e-58	K05387|1|0.0|833|ath:AT2G29110|glutamate receptor, ionotropic, other eukaryote	GO:0016020//membrane	GO:0004872//receptor activity;GO:0005216//ion channel activity	GO:0006810//transport	gi|224142043|ref|XP_002324368.1|/0/glutamate-gated kainate-type ion channel receptor subunit GluR5 [Populus trichocarpa]
Pbr037640.1	843	270	45	60.6143	10.6185	-2.51308	Down	4.3602e-38	1.17429e-36	K13425|1|1e-26|118|pop:POPTR_755334|WRKY transcription factor 22	GO:0043231//intracellular membrane-bounded organelle	GO:0005515//protein binding	GO:0006351//transcription, DNA-dependent;GO:0006952//defense response;GO:0009743//response to carbohydrate stimulus	gi|302399129|gb|ADL36859.1|/1.21722e-146/WRKY domain class transcription factor [Malus x domestica]
Pbr011405.1	1263	2767	462	414.615	72.7642	-2.51047	Down	0	0	K14497|1|3e-118|423|gmx:100776356|protein phosphatase 2C [EC:3.1.3.16]	-	GO:0019900//kinase binding;GO:0004721//phosphoprotein phosphatase activity	GO:0010118//stomatal movement;GO:0010359//regulation of anion channel activity;GO:0009738//abscisic acid mediated signaling pathway;GO:0006950//response to stress	gi|33309516|gb|AAQ03211.1|AF411074_1/1.43304e-161/protein phosphatase 2C [Prunus avium]
Pbr005041.2	792	688	116	164.4	29.1348	-2.4964	Down	8.03968e-94	5.02416e-92	-	GO:0016020//membrane	-	GO:0006950//response to stress	gi|224117290|ref|XP_002317531.1|/4.00138e-64/predicted protein [Populus trichocarpa]
Pbr031532.1	1920	71	12	6.99836	1.24325	-2.4929	Down	6.11094e-11	5.78854e-10	K00703|1|0.0|914|pop:POPTR_1100713|starch synthase [EC:2.4.1.21]	GO:0009532//plastid stroma	GO:0046527//glucosyltransferase activity	GO:0051707//response to other organism;GO:0005982//starch metabolic process;GO:0009250//glucan biosynthetic process;GO:0007165//signal transduction;GO:0005977//glycogen metabolic process	gi|224135151|ref|XP_002321996.1|/0/predicted protein [Populus trichocarpa]
Pbr005766.1	861	24401	4130	5363.44	954.171	-2.49084	Down	0	0	-	-	-	-	gi|382948207|gb|AFG33218.1|/2.76378e-93/dehydrin 8 [Malus x domestica]
Pbr004987.1	315	608	103	365.285	65.0438	-2.48954	Down	7.42992e-83	4.10736e-81	-	GO:0044464//cell part	-	GO:0045333//cellular respiration	gi|225450289|ref|XP_002271097.1|/1.84772e-21/PREDICTED: uncharacterized protein LOC100266637 [Vitis vinifera]
Pbr031894.1	1011	112	19	20.9655	3.73837	-2.48754	Down	1.82713e-16	2.46163e-15	K00430|1|8e-154|541|pop:POPTR_647567|peroxidase [EC:1.11.1.7]	-	GO:0005506//iron ion binding;GO:0003824//catalytic activity;GO:0016209//antioxidant activity	GO:0008152//metabolic process;GO:0006950//response to stress	gi|402228004|gb|AFQ36035.1|/5.9109e-165/peroxidase [Fragaria x ananassa]
Pbr022408.1	963	865	147	169.992	30.3648	-2.485	Down	6.81004e-117	5.37501e-115	K13424|1|5e-17|86.7|pop:POPTR_663578|WRKY transcription factor 33	-	-	-	gi|315272008|gb|ADU02585.1|/3.52881e-95/WRKY transcription factor 4 [Vitis vinifera]
Pbr013609.1	1761	194	33	20.8488	3.72764	-2.48363	Down	1.94148e-27	4.00452e-26	K05391|1|2e-120|431|ath:AT5G53130|cyclic nucleotide gated channel, other eukaryote	GO:0016020//membrane	GO:0005249//voltage-gated potassium channel activity;GO:0005515//protein binding;GO:0005217//intracellular ligand-gated ion channel activity	GO:0070838//divalent metal ion transport	gi|15238657|ref|NP_200125.1|/2.71685e-119/cyclic nucleotide-gated ion channel 1 [Arabidopsis thaliana]
Pbr001826.1	366	417	71	215.622	38.5884	-2.48227	Down	3.63688e-57	1.40084e-55	-	-	-	-	gi|359484646|ref|XP_003633137.1|/2.05772e-28/PREDICTED: uncharacterized protein LOC100854031 [Vitis vinifera]
Pbr036724.1	213	152	26	135.053	24.2814	-2.4756	Down	9.77982e-22	1.64659e-20	-	-	-	GO:0008152//metabolic process	gi|224143851|ref|XP_002325096.1|/5.94112e-20/predicted protein [Populus trichocarpa]
Pbr003675.1	969	304	52	59.373	10.6748	-2.4756	Down	5.53364e-42	1.64259e-40	K12616|1|1e-44|178|vvi:100259985|enhancer of mRNA-decapping protein 4	GO:0043231//intracellular membrane-bounded organelle;GO:0044444//cytoplasmic part;GO:0030529//ribonucleoprotein complex	GO:0042802//identical protein binding	GO:0009887//organ morphogenesis;GO:0031086//nuclear-transcribed mRNA catabolic process, deadenylation-independent decay	gi|296090001|emb|CBI39820.3|/1.07835e-43/unnamed protein product [Vitis vinifera]
Pbr018664.1	366	402	69	207.866	37.5014	-2.47064	Down	7.04916e-55	2.62986e-53	-	-	-	-	gi|255590302|ref|XP_002535232.1|/4.28066e-34/metal ion binding protein, putative [Ricinus communis]
Pbr032730.1	567	1066	183	355.806	64.2018	-2.4704	Down	1.14174e-142	1.07888e-140	-	-	GO:0005488//binding	-	gi|224106053|ref|XP_002314027.1|/1.54954e-51/predicted protein [Populus trichocarpa]
Pbr038910.1	2049	64	11	5.91122	1.0679	-2.46868	Down	6.8619e-10	5.9755e-09	K00924|1|1e-51|203|ath:AT3G59420|[EC:2.7.1.-];K04733|2|4e-51|201|smo:SELMODRAFT_159261|interleukin-1 receptor-associated kinase 4 [EC:2.7.11.1]	GO:0016020//membrane	GO:0004672//protein kinase activity;GO:0032559	GO:0006464//cellular protein modification process	gi|297734240|emb|CBI15487.3|/0/unnamed protein product [Vitis vinifera]
Pbr008102.1	801	58	10	13.7036	2.4834	-2.46417	Down	4.6121e-09	3.7297e-08	K07025|1|1e-100|363|pop:POPTR_658536|putative hydrolase of the HAD superfamily	-	GO:0003824//catalytic activity	-	gi|224108057|ref|XP_002314706.1|/1.34431e-99/predicted protein [Populus trichocarpa]
Pbr013012.1	2844	29	5	1.92978	0.349719	-2.46417	Down	4.1609e-05	0.00020861	K03013|1|4e-118|424|vvi:100258335|DNA-directed RNA polymerases I, II, and III subunit RPABC1;K13457|2|7e-59|227|vvi:100252764|disease resistance protein RPM1	-	-	-	gi|224122712|ref|XP_002318907.1|/0/cc-nbs-lrr resistance protein [Populus trichocarpa]
Pbr028054.1	369	1585	274	812.909	147.708	-2.46035	Down	3.18816e-210	4.51116e-208	-	-	-	-	gi|356571872|ref|XP_003554095.1|/6.40303e-14/PREDICTED: uncharacterized protein LOC100790912 [Glycine max]
Pbr009535.1	1953	11219	1941	1087.15	197.698	-2.45918	Down	0	0	K15172|1|7e-28|124|vcn:VOLCADRAFT_106802|transcription elongation factor SPT5	-	GO:0005488//binding	GO:0006952//defense response;GO:0009743//response to carbohydrate stimulus	gi|302398711|gb|ADL36650.1|/0/C3HL domain class transcription factor [Malus x domestica]
Pbr037952.1	999	1802	312	341.372	62.1253	-2.45809	Down	1.74062e-238	2.86353e-236	K11778|1|6e-109|392|mtr:MTR_1g095500|ditrans,polycis-polyprenyl diphosphate synthase [EC:2.5.1.87]	-	GO:0016765//transferase activity, transferring alkyl or aryl (other than methyl) groups	-	gi|357443329|ref|XP_003591942.1|/6.51749e-108/Undecaprenyl pyrophosphate synthetase [Medicago truncatula]
Pbr020203.1	1596	190	33	22.5299	4.11302	-2.45357	Down	1.50614e-26	3.00448e-25	-	-	-	-	gi|359491381|ref|XP_002267425.2|/0/PREDICTED: DUF246 domain-containing protein At1g04910-like [Vitis vinifera]
Pbr032362.1	1974	32860	5719	3150.35	576.305	-2.45061	Down	0	0	K03283|1|0.0|1142|vvi:100253562|heat shock 70kDa protein 1/8	-	GO:0016628//oxidoreductase activity, acting on the CH-CH group of donors, NAD or NADP as acceptor;GO:0032559	GO:0008152//metabolic process;GO:0050896//response to stimulus	gi|6969976|gb|AAF34134.1|/0/high molecular weight heat shock protein [Malus x domestica]
Pbr011702.1	1491	172	30	21.8318	4.00242	-2.44749	Down	4.16686e-24	7.65251e-23	K01051|1|0.0|754|pop:POPTR_589361|pectinesterase [EC:3.1.1.11]	GO:0005618//cell wall	GO:0030234//enzyme regulator activity;GO:0004091//carboxylesterase activity	GO:0071555//cell wall organization;GO:0045229//external encapsulating structure organization	gi|119507467|dbj|BAF42041.1|/0/pectin methylesterase 4 [Pyrus communis]
Pbr014369.1	465	189	33	76.9215	14.1169	-2.44596	Down	2.50892e-26	4.96853e-25	K13448|1|1e-43|173|pop:POPTR_711309|calcium-binding protein CML	GO:0043231//intracellular membrane-bounded organelle;GO:0016020//membrane	GO:0046872//metal ion binding;GO:0016491//oxidoreductase activity	GO:0046209//nitric oxide metabolic process;GO:0009908//flower development	gi|356539832|ref|XP_003538397.1|/1.49067e-46/PREDICTED: probable calcium-binding protein CML27-like isoform 1 [Glycine max]
Pbr010170.1	1497	166	29	20.9858	3.8535	-2.44517	Down	2.71784e-23	4.86061e-22	-	-	GO:0016740//transferase activity	-	gi|225426468|ref|XP_002270850.1|/0/PREDICTED: uncharacterized protein LOC100253017 [Vitis vinifera]
Pbr041089.1	2844	40	7	2.66176	0.489607	-2.44269	Down	1.44801e-06	8.92233e-06	K13420|1|2e-67|255|osa:4337016|LRR receptor-like serine/threonine-protein kinase FLS2 [EC:2.7.11.1]	-	-	-	gi|359488583|ref|XP_003633782.1|/0/PREDICTED: LRR receptor-like serine/threonine-protein kinase FLS2-like [Vitis vinifera]
Pbr006333.1	558	137	24	46.4649	8.55572	-2.44118	Down	1.94502e-19	2.97906e-18	-	-	-	-	gi|12003402|gb|AAG43558.1|AF211540_1/8.81251e-12/Avr9/Cf-9 rapidly elicited protein 75 [Nicotiana tabacum]
Pbr027710.2	1053	97	17	17.4334	3.21144	-2.44056	Down	3.7092e-14	4.38505e-13	K00640|1|1e-133|474|pop:POPTR_818359|serine O-acetyltransferase [EC:2.3.1.30]	GO:0044444//cytoplasmic part	GO:0016412//serine O-acyltransferase activity	GO:0006790//sulfur compound metabolic process;GO:0006563//L-serine metabolic process	gi|224081471|ref|XP_002306423.1|/1.08453e-132/predicted protein [Populus trichocarpa]
Pbr040751.1	1566	51	9	6.16336	1.14322	-2.43061	Down	5.21542e-08	3.8001e-07	K01114|1|0.0|768|pop:POPTR_571365|phospholipase C [EC:3.1.4.3]	GO:0043231//intracellular membrane-bounded organelle;GO:0044444//cytoplasmic part;GO:0016020//membrane	GO:0004629//phospholipase C activity	GO:0006793//phosphorus metabolic process;GO:0006644//phospholipid metabolic process;GO:0006664//glycolipid metabolic process;GO:0009267//cellular response to starvation	gi|359489132|ref|XP_003633883.1|/0/PREDICTED: phospholipase C 3-like isoform 2 [Vitis vinifera]
Pbr006449.1	1080	158	28	27.6868	5.1572	-2.42454	Down	4.90996e-22	8.3647e-21	-	-	GO:0005488//binding	-	gi|147803537|emb|CAN77669.1|/5.47531e-63/hypothetical protein VITISV_038107 [Vitis vinifera]
Pbr007682.1	1464	1398	248	180.72	33.6969	-2.42306	Down	2.1694e-182	2.55363e-180	-	GO:0031225//anchored to membrane;GO:0031410//cytoplasmic vesicle	GO:0043167//ion binding;GO:0008422//beta-glucosidase activity	GO:0044238//primary metabolic process	gi|255568950|ref|XP_002525445.1|/0/Glucan endo-1,3-beta-glucosidase precursor, putative [Ricinus communis]
Pbr023112.3	2895	45	8	2.94173	0.549694	-2.41997	Down	3.54328e-07	2.33954e-06	K03013|1|3e-112|404|vvi:100258335|DNA-directed RNA polymerases I, II, and III subunit RPABC1;K13457|2|4e-55|215|vvi:100252764|disease resistance protein RPM1	-	-	-	gi|224122712|ref|XP_002318907.1|/0/cc-nbs-lrr resistance protein [Populus trichocarpa]
Pbr007566.2	1740	73	13	7.93986	1.48619	-2.4175	Down	7.16538e-11	6.73827e-10	-	-	-	-	gi|224069012|ref|XP_002326253.1|/8.13026e-84/predicted protein [Populus trichocarpa]
Pbr019864.1	765	28	5	6.92685	1.30013	-2.41354	Down	7.00256e-05	0.000338286	-	-	-	-	gi|255550075|ref|XP_002516088.1|/6.45537e-32/conserved hypothetical protein [Ricinus communis]
Pbr026655.1	3063	28	5	1.73002	0.324715	-2.41354	Down	7.00256e-05	0.000338226	K08286|1|1e-125|449|ath:AT4G28490|protein-serine/threonine kinase [EC:2.7.11.-];K13420|3|6e-120|430|sbi:SORBI_06g028760|LRR receptor-like serine/threonine-protein kinase FLS2 [EC:2.7.11.1]	GO:0044464//cell part	GO:0016740//transferase activity	-	gi|224132304|ref|XP_002321306.1|/0/predicted protein [Populus trichocarpa]
Pbr016152.2	990	28	5	5.35256	1.00465	-2.41354	Down	7.00256e-05	0.000338166	K01365|1|6e-82|302|rcu:RCOM_1043080|cathepsin L [EC:3.4.22.15]	-	GO:0016787//hydrolase activity	-	gi|255564908|ref|XP_002523447.1|/6.69415e-81/cysteine protease, putative [Ricinus communis]
Pbr005419.1	1716	13923	2492	1535.52	288.875	-2.41021	Down	0	0	K01177|1|0.0|924|rcu:RCOM_1023980|beta-amylase [EC:3.2.1.2]	GO:0043231//intracellular membrane-bounded organelle;GO:0044444//cytoplasmic part;GO:0016020//membrane	GO:0016772//transferase activity, transferring phosphorus-containing groups;GO:0016160//amylase activity;GO:0005102//receptor binding;GO:0043167//ion binding;GO:0032559	GO:0005982//starch metabolic process;GO:0009933//meristem structural organization;GO:0007167//enzyme linked receptor protein signaling pathway;GO:0010073//meristem maintenance;GO:0003006//developmental process involved in reproduction;GO:0006950//response to stress;GO:0006464//cellular protein modification process	gi|255554312|ref|XP_002518196.1|/0/Beta-amylase, putative [Ricinus communis]
Pbr010331.1	1221	564	101	87.4183	16.4545	-2.40945	Down	3.62978e-74	1.77645e-72	K09561|1|7e-06|50.1|vcn:VOLCADRAFT_67840|STIP1 homology and U-box containing protein 1 [EC:6.3.2.19]	GO:0043234//protein complex;GO:0044444//cytoplasmic part	GO:0019787//small conjugating protein ligase activity	GO:0006950//response to stress;GO:0016567//protein ubiquitination;GO:0002252	gi|225439452|ref|XP_002267438.1|/4.25318e-155/PREDICTED: E3 ubiquitin-protein ligase PUB23-like [Vitis vinifera]
Pbr033022.1	816	145	26	33.6292	6.33815	-2.40758	Down	3.47612e-20	5.47459e-19	-	-	-	-	gi|225465451|ref|XP_002266369.1|/9.83447e-106/PREDICTED: PPPDE peptidase domain-containing protein 2-like isoform 2 [Vitis vinifera]
Pbr002473.1	1458	128	23	16.6147	3.13798	-2.40455	Down	5.8564e-18	8.48448e-17	K13420|1|3e-32|138|ath:AT5G46330|LRR receptor-like serine/threonine-protein kinase FLS2 [EC:2.7.11.1]	-	-	-	gi|359488583|ref|XP_003633782.1|/2.08007e-90/PREDICTED: LRR receptor-like serine/threonine-protein kinase FLS2-like [Vitis vinifera]
Pbr030938.1	2496	328	59	24.8696	4.70205	-2.40302	Down	1.09684e-43	3.39227e-42	K13416|1|5e-54|211|ath:AT4G33430|brassinosteroid insensitive 1-associated receptor kinase 1 [EC:2.7.10.1 2.7.11.1];K13418|3|2e-53|209|aly:ARALYDRAFT_895025|somatic embryogenesis receptor kinase 1 [EC:2.7.10.1 2.7.11.1]	-	GO:0004672//protein kinase activity;GO:0032559	GO:0009753//response to jasmonic acid stimulus;GO:0006464//cellular protein modification process;GO:0006950//response to stress;GO:0009751//response to salicylic acid stimulus;GO:0051707//response to other organism	gi|224141241|ref|XP_002323983.1|/0/predicted protein [Populus trichocarpa]
Pbr035825.1	1134	100	18	16.6888	3.15747	-2.40204	Down	2.59264e-14	3.09316e-13	K05692|1|0.0|730|pop:POPTR_561252|actin beta/gamma 1;K10355|3|0.0|722|osa:4333919|actin, other eukaryote	GO:0043232	GO:0032559	-	gi|224088196|ref|XP_002308365.1|/0/actin 3 [Populus trichocarpa]
Pbr021979.1	816	7816	1410	1812.73	343.723	-2.39885	Down	0	0	-	-	-	-	gi|302398685|gb|ADL36637.1|/9.48138e-117/C2H2L domain class transcription factor [Malus x domestica]
Pbr010854.1	930	393	71	79.974	15.1864	-2.39675	Down	7.1842e-52	2.5546e-50	K15746|1|4e-112|402|rcu:RCOM_1582530|beta-carotene 3-hydroxylase [EC:1.14.13.129]	GO:0016020//membrane	-	GO:0008152//metabolic process	gi|328909633|gb|AEB61491.1|/4.94563e-115/beta carotene hydroxylase-1 [Morus indica]
Pbr016107.1	3285	83	15	4.78169	0.908312	-2.39626	Down	4.4964e-12	4.61278e-11	K10999|1|0.0|1696|gmx:100789617|cellulose synthase A [EC:2.4.1.12]	GO:0031224//intrinsic to membrane	GO:0016759//cellulose synthase activity	GO:0045229//external encapsulating structure organization;GO:0009250//glucan biosynthetic process	gi|359483534|ref|XP_002269610.2|/0/PREDICTED: cellulose synthase A catalytic subunit 8 [UDP-forming] [Vitis vinifera]
Pbr012131.1	3300	33	6	1.89251	0.361673	-2.38754	Down	1.67588e-05	8.9075e-05	-	-	GO:0034062//RNA polymerase activity	GO:0048522//positive regulation of cellular process;GO:0010033//response to organic substance;GO:0010608//posttranscriptional regulation of gene expression;GO:0051707//response to other organism	gi|225424397|ref|XP_002284914.1|/0/PREDICTED: RNA-dependent RNA polymerase 1 [Vitis vinifera]
Pbr015458.1	1875	44	8	4.4411	0.848727	-2.38754	Down	5.91602e-07	3.79964e-06	K13420|1|7e-28|124|sbi:SORBI_06g028760|LRR receptor-like serine/threonine-protein kinase FLS2 [EC:2.7.11.1]	GO:0005618//cell wall	GO:0005198//structural molecule activity;GO:0003824//catalytic activity;GO:0005488//binding	-	gi|359484368|ref|XP_002281292.2|/1.57855e-173/PREDICTED: uncharacterized protein LOC100259389 [Vitis vinifera]
Pbr010912.1	1947	6888	1257	669.524	128.425	-2.38221	Down	0	0	K15172|1|3e-28|125|vcn:VOLCADRAFT_106802|transcription elongation factor SPT5	-	GO:0005488//binding	GO:0006351//transcription, DNA-dependent;GO:0006952//defense response;GO:0009743//response to carbohydrate stimulus	gi|302398711|gb|ADL36650.1|/0/C3HL domain class transcription factor [Malus x domestica]
Pbr017622.1	1185	115	21	18.3662	3.52517	-2.38129	Down	4.16918e-16	5.50562e-15	-	GO:0016020//membrane	-	-	gi|255581601|ref|XP_002531605.1|/5.18648e-126/dopamine beta-monooxygenase, putative [Ricinus communis]
Pbr029084.1	1536	197	36	24.2725	4.6622	-2.38024	Down	1.4457e-26	2.89024e-25	K13420|1|3e-13|75.1|aly:ARALYDRAFT_356368|LRR receptor-like serine/threonine-protein kinase FLS2 [EC:2.7.11.1];K13418|5|2e-11|69.3|rcu:RCOM_0186340|somatic embryogenesis receptor kinase 1 [EC:2.7.10.1 2.7.11.1]	GO:0031410//cytoplasmic vesicle	-	-	gi|225432596|ref|XP_002281432.1|/0/PREDICTED: probable LRR receptor-like serine/threonine-protein kinase At1g67720 [Vitis vinifera]
Pbr042816.1	540	93	17	32.5933	6.26231	-2.37981	Down	2.83562e-13	3.18151e-12	K13258|1|6e-38|154|gmx:547489|2-hydroxyisoflavanone dehydratase [EC:4.2.1.105];K14493|2|4e-20|95.5|osa:4338764|gibberellin receptor GID1 [EC:3.-.-.-]	-	-	-	gi|82697943|gb|ABB89006.1|/1.44137e-77/CXE carboxylesterase [Malus pumila]
Pbr032140.1	3258	82	15	4.76323	0.91584	-2.37877	Down	7.46418e-12	7.53008e-11	K14209|1|2e-43|167|pop:POPTR_556769|solute carrier family 36 (proton-coupled amino acid transporter)	-	-	-	gi|224145030|ref|XP_002325501.1|/8.29812e-99/tir-nbs-lrr resistance protein [Populus trichocarpa]
Pbr029474.1	627	317	58	95.6821	18.4009	-2.37847	Down	8.76706e-42	2.57718e-40	-	-	-	-	gi|356527058|ref|XP_003532131.1|/3.16564e-46/PREDICTED: uncharacterized protein LOC100788195 isoform 1 [Glycine max]
Pbr007170.1	972	240	44	46.7287	9.00463	-2.37557	Down	5.7494e-32	1.34082e-30	-	-	GO:0046914//transition metal ion binding;GO:0003676//nucleic acid binding	-	gi|302398771|gb|ADL36680.1|/2.00632e-106/DOF domain class transcription factor [Malus x domestica]
Pbr019189.1	927	109	20	22.2529	4.2917	-2.37437	Down	2.7348e-15	3.45123e-14	K06215|1|5e-118|422|pop:POPTR_548840|pyridoxine biosynthesis protein [EC:4.-.-.-]	GO:0044444//cytoplasmic part;GO:0016020//membrane	GO:0042802//identical protein binding;GO:0046983//protein dimerization activity	GO:0042364;GO:0009108//coenzyme biosynthetic process;GO:0006778//porphyrin-containing compound metabolic process;GO:0008614//pyridoxine metabolic process;GO:0006972//hyperosmotic response;GO:0033194//response to hydroperoxide;GO:0019752//carboxylic acid metabolic process	gi|224059070|ref|XP_002299701.1|/5.2557e-117/predicted protein [Populus trichocarpa]
Pbr039338.1	1632	49	9	5.68218	1.09699	-2.3729	Down	1.45059e-07	1.00671e-06	K06685|1|3e-23|108|aly:ARALYDRAFT_492950|maintenance of ploidy protein MOB1 (MPS1 binder 1)	-	-	-	gi|255561514|ref|XP_002521767.1|/1.27021e-99/leucine-rich repeat-containing protein, putative [Ricinus communis]
Pbr000744.1	1986	49	9	4.66934	0.901452	-2.3729	Down	1.45059e-07	1.00697e-06	-	-	-	-	gi|255582552|ref|XP_002532059.1|/0/calmodulin binding protein, putative [Ricinus communis]
Pbr028746.1	570	702	129	233.078	45.0188	-2.37221	Down	3.0496e-90	1.83439e-88	-	-	-	-	gi|224099449|ref|XP_002311488.1|/1.87783e-65/predicted protein [Populus trichocarpa]
Pbr017807.1	675	265	49	74.2987	14.4401	-2.36325	Down	6.25244e-35	1.56649e-33	-	-	-	-	gi|224106179|ref|XP_002314074.1|/1.80163e-85/predicted protein [Populus trichocarpa]
Pbr002219.1	600	27	5	8.51631	1.65767	-2.36107	Down	0.000117323	0.000542861	-	-	-	-	gi|224138504|ref|XP_002326619.1|/2.65266e-07/predicted protein [Populus trichocarpa]
Pbr028471.1	1386	27	5	3.68672	0.717606	-2.36107	Down	0.000117323	0.000542953	-	-	GO:0016798//hydrolase activity, acting on glycosyl bonds;GO:0043167//ion binding	GO:0044238//primary metabolic process	gi|297735525|emb|CBI18019.3|/0/unnamed protein product [Vitis vinifera]
Pbr040531.1	1200	59	11	9.30486	1.82344	-2.35132	Down	8.82614e-09	6.95421e-08	-	-	-	-	gi|255579629|ref|XP_002530655.1|/4.63878e-114/conserved hypothetical protein [Ricinus communis]
Pbr025091.1	2439	332	62	25.7612	5.05661	-2.34896	Down	4.59004e-43	1.39743e-41	K03013|1|7e-18|91.3|vvi:100258335|DNA-directed RNA polymerases I, II, and III subunit RPABC1;K13457|3|2e-16|86.7|sbi:SORBI_02g004900|disease resistance protein RPM1	-	-	-	gi|359480461|ref|XP_002268207.2|/0/PREDICTED: probable disease resistance protein At5g66900-like [Vitis vinifera]
Pbr011906.1	852	913	171	202.801	39.9242	-2.34473	Down	3.06876e-115	2.38082e-113	K12581|1|1e-79|294|ppp:PHYPADRAFT_185698|CCR4-NOT transcription complex subunit 7/8	GO:0043231//intracellular membrane-bounded organelle	GO:0000175//3'-5'-exoribonuclease activity;GO:0005488//binding	GO:0006950//response to stress;GO:0016070//RNA metabolic process	gi|224131812|ref|XP_002328114.1|/2.5105e-131/predicted protein [Populus trichocarpa]
Pbr014858.1	1128	48	9	8.05325	1.58713	-2.34315	Down	2.4091e-07	1.62887e-06	K13415|1|8e-60|229|sbi:SORBI_03g012040|protein brassinosteroid insensitive 1 [EC:2.7.10.1 2.7.11.1];K00924|2|9e-46|182|ath:AT5G25930|[EC:2.7.1.-]	GO:0044464//cell part	-	-	gi|147767326|emb|CAN68996.1|/3.74692e-102/hypothetical protein VITISV_008862 [Vitis vinifera]
Pbr039186.1	249	245	46	186.211	36.7484	-2.34119	Down	4.56822e-32	1.07085e-30	-	-	-	-	gi|224135737|ref|XP_002322148.1|/8.88053e-16/predicted protein [Populus trichocarpa]
Pbr013821.1	504	69	13	25.9094	5.13088	-2.3362	Down	5.4358e-10	4.76094e-09	-	GO:0044425//membrane part	GO:0004872//receptor activity;GO:0032559	GO:0006952//defense response;GO:0012501//programmed cell death;GO:0023052//signaling	gi|357486483|ref|XP_003613529.1|/4.85448e-50/TMV resistance protein N [Medicago truncatula]
Pbr016918.1	285	53	10	35.1941	6.97966	-2.3341	Down	5.92104e-08	4.28679e-07	K07442|1|2e-12|68.9|aly:ARALYDRAFT_325929|tRNA (adenine57-N1/adenine58-N1)-methyltransferase [EC:2.1.1.219 2.1.1.220]	-	-	-	gi|224125870|ref|XP_002319695.1|/7.99637e-25/predicted protein [Populus trichocarpa]
Pbr007692.1	282	74	14	49.6617	9.87548	-2.33021	Down	1.35378e-10	1.24563e-09	K07442|1|5e-12|67.4|aly:ARALYDRAFT_325929|tRNA (adenine57-N1/adenine58-N1)-methyltransferase [EC:2.1.1.219 2.1.1.220]	-	-	-	gi|224125870|ref|XP_002319695.1|/2.75748e-25/predicted protein [Populus trichocarpa]
Pbr018864.1	453	37	7	15.4576	3.07383	-2.33021	Down	6.73278e-06	3.77935e-05	K13448|1|2e-75|278|pop:POPTR_726467|calcium-binding protein CML	-	GO:0016628//oxidoreductase activity, acting on the CH-CH group of donors, NAD or NADP as acceptor;GO:0046872//metal ion binding	GO:0019932//second-messenger-mediated signaling;GO:0008152//metabolic process;GO:0009593//detection of chemical stimulus	gi|224107937|ref|XP_002314661.1|/2.05745e-74/predicted protein [Populus trichocarpa]
Pbr019862.1	1206	148	28	23.2249	4.61838	-2.33021	Down	7.54018e-20	1.17397e-18	-	-	-	-	gi|224142786|ref|XP_002324731.1|/1.24977e-58/predicted protein [Populus trichocarpa]
Pbr036123.3	1002	586	111	110.68	22.0361	-2.32845	Down	5.48744e-74	2.66175e-72	K02183|1|2e-45|181|smo:SELMODRAFT_166784|calmodulin	-	GO:0005515//protein binding	-	gi|224133440|ref|XP_002321568.1|/2.18003e-103/predicted protein [Populus trichocarpa]
Pbr007130.1	519	600	114	218.788	43.6935	-2.32404	Down	1.51949e-75	7.58607e-74	-	-	-	-	gi|356511597|ref|XP_003524510.1|/1.41755e-39/PREDICTED: oleosin 16 kDa-like [Glycine max]
Pbr014955.1	1581	200	38	23.9407	4.78114	-2.32404	Down	3.10286e-26	6.12254e-25	K00517|1|3e-118|423|ath:AT4G31940|[EC:1.14.-.-];K05280|2|2e-75|281|mtr:MTR_3g025230|flavonoid 3'-monooxygenase [EC:1.14.13.21]	-	GO:0005506//iron ion binding;GO:0004497//monooxygenase activity	GO:0008299//isoprenoid biosynthetic process	gi|255580537|ref|XP_002531093.1|/7.0414e-172/cytochrome P450, putative [Ricinus communis]
Pbr040083.1	1383	168	32	22.9893	4.60264	-2.32043	Down	3.11634e-22	5.35583e-21	-	-	-	-	gi|399920194|gb|AFP55541.1|/0/major facilitator superfamily domain [Rosa rugosa]
Pbr011400.1	1050	3091	589	557.12	111.585	-2.31985	Down	0	0	K00966|1|3e-174|608|vvi:100233006|mannose-1-phosphate guanylyltransferase [EC:2.7.7.13]	-	GO:0008905	GO:0008152//metabolic process	gi|240851533|gb|ACN88684.2|/0/GDP-D-mannose pyrophosphorylase [Malus x domestica]
Pbr011043.1	555	47	9	16.0267	3.22574	-2.31278	Down	3.9893e-07	2.61947e-06	K10999|1|1e-92|336|vvi:100241197|cellulose synthase A [EC:2.4.1.12]	GO:0031224//intrinsic to membrane	GO:0016759//cellulose synthase activity;GO:0046914//transition metal ion binding	GO:0045229//external encapsulating structure organization;GO:0009250//glucan biosynthetic process	gi|297744201|emb|CBI37171.3|/1.1085e-91/unnamed protein product [Vitis vinifera]
Pbr010044.1	915	2359	452	487.917	98.2645	-2.31189	Down	8.23212e-290	1.75634e-287	-	-	-	-	gi|224085053|ref|XP_002307472.1|/4.83578e-99/predicted protein [Populus trichocarpa]
Pbr007250.1	1980	120	23	11.4698	2.31069	-2.31144	Down	3.25026e-16	4.3109e-15	K13430|1|5e-62|237|zma:100283091|serine/threonine-protein kinase PBS1 [EC:2.7.11.1]	-	GO:0016740//transferase activity	-	gi|359474717|ref|XP_002267916.2|/0/PREDICTED: cysteine-rich receptor-like protein kinase 25-like isoform 1 [Vitis vinifera]
Pbr024206.1	1572	1457	280	175.407	35.4311	-2.30761	Down	2.39686e-179	2.78536e-177	K06636|1|9e-18|90.1|ppp:PHYPADRAFT_79481|structural maintenance of chromosome 1	-	-	-	gi|224114764|ref|XP_002316851.1|/3.71421e-165/predicted protein [Populus trichocarpa]
Pbr028226.1	798	15829	3042	3753.96	758.291	-2.30759	Down	0	0	K00522|1|9e-78|288|rcu:RCOM_0847660|ferritin heavy chain [EC:1.16.3.1]	-	GO:0046914//transition metal ion binding	-	gi|89276793|gb|ABD66595.1|/6.17309e-113/iron-binding protein [Pyrus pyrifolia]
Pbr034943.1	813	88	17	20.4848	4.15947	-2.30008	Down	3.4794e-12	3.62529e-11	-	-	-	-	gi|255548806|ref|XP_002515459.1|/1.17558e-42/conserved hypothetical protein [Ricinus communis]
Pbr035539.1	2085	88	17	7.98759	1.62189	-2.30008	Down	3.4794e-12	3.62391e-11	K13416|1|1e-51|202|rcu:RCOM_1534760|brassinosteroid insensitive 1-associated receptor kinase 1 [EC:2.7.10.1 2.7.11.1];K04733|2|3e-51|201|smo:SELMODRAFT_159261|interleukin-1 receptor-associated kinase 4 [EC:2.7.11.1];K13418|4|1e-50|199|vvi:100247683|somatic embryogenesis receptor kinase 1 [EC:2.7.10.1 2.7.11.1]	GO:0043231//intracellular membrane-bounded organelle	GO:0004672//protein kinase activity;GO:0000166//nucleotide binding	-	gi|225428360|ref|XP_002280067.1|/0/PREDICTED: probable L-type lectin-domain containing receptor kinase S.5-like [Vitis vinifera]
Pbr022332.1	1011	4735	917	886.355	180.425	-2.29648	Down	0	0	-	-	-	-	gi|302399005|gb|ADL36797.1|/0/NAC domain class transcription factor [Malus x domestica]
Pbr000289.1	1104	1449	281	248.392	50.631	-2.29453	Down	3.70952e-177	4.18609e-175	-	-	-	-	gi|255560836|ref|XP_002521431.1|/7.63429e-68/conserved hypothetical protein [Ricinus communis]
Pbr000428.1	594	36	7	11.4698	2.34418	-2.29068	Down	1.11569e-05	6.067e-05	-	-	GO:0016758//transferase activity, transferring hexosyl groups	-	gi|255563008|ref|XP_002522508.1|/5.6611e-71/UDP-glucosyltransferase, putative [Ricinus communis]
Pbr004809.1	1284	5311	1035	782.799	160.345	-2.28747	Down	0	0	K05359|1|0.0|669|pop:POPTR_721464|arogenate/prephenate dehydratase [EC:4.2.1.91 4.2.1.51]	GO:0009536//plastid	GO:0016836//hydro-lyase activity	GO:0009637//response to blue light;GO:0006558//L-phenylalanine metabolic process;GO:0006570//tyrosine metabolic process	gi|224105005|ref|XP_002313651.1|/0/arogenate/prephenate dehydratase [Populus trichocarpa]
Pbr035487.1	723	82	16	21.4642	4.40211	-2.28566	Down	2.28596e-11	2.23034e-10	K15692|1|8e-08|55.5|gmx:100793048|E3 ubiquitin-protein ligase RNF13 [EC:6.3.2.19];K14297|2|3e-07|53.5|mtr:MTR_1g066430|nuclear pore complex protein Nup98-Nup96;K05283|3|4e-07|53.1|aly:ARALYDRAFT_354960|phosphatidylinositol glycan, class W [EC:2.3.-.-]	GO:0044464//cell part	GO:0046914//transition metal ion binding	GO:0009725//response to hormone stimulus;GO:0009743//response to carbohydrate stimulus	gi|225454353|ref|XP_002278353.1|/3.39968e-64/PREDICTED: E3 ubiquitin-protein ligase RHA1B [Vitis vinifera]
Pbr016390.1	498	41	8	15.5809	3.19551	-2.28566	Down	2.70184e-06	1.60716e-05	-	-	-	GO:0050896//response to stimulus	gi|357462143|ref|XP_003601353.1|/4.84878e-39/TIR-NBS-LRR type disease resistance protein [Medicago truncatula]
Pbr041645.1	2970	174	34	11.0875	2.2772	-2.28359	Down	1.45245e-22	2.52644e-21	K13420|1|3e-78|291|pop:POPTR_1075175|LRR receptor-like serine/threonine-protein kinase FLS2 [EC:2.7.11.1]	-	-	-	gi|359490572|ref|XP_003634116.1|/0/PREDICTED: probable LRR receptor-like serine/threonine-protein kinase At4g36180-like [Vitis vinifera]
Pbr036148.1	1386	1671	327	228.167	46.9314	-2.28146	Down	1.3318e-202	1.77415e-200	-	GO:0031410//cytoplasmic vesicle	-	-	gi|225468648|ref|XP_002268069.1|/0/PREDICTED: lipase [Vitis vinifera]
Pbr028045.1	999	6545	1284	1239.89	255.669	-2.27786	Down	0	0	K00750|1|1e-13|75.5|rcu:RCOM_1590700|glycogenin glucosyltransferase [EC:2.4.1.186]	-	GO:0016757//transferase activity, transferring glycosyl groups	GO:0005975//carbohydrate metabolic process;GO:0006950//response to stress	gi|321268093|gb|ADW78849.1|/9.60452e-152/galactinol synthase [Solanum tuberosum]
Pbr000051.1	1185	2060	405	328.994	67.9855	-2.27476	Down	2.01436e-248	3.41678e-246	-	GO:0016020//membrane	-	-	gi|359483457|ref|XP_002267894.2|/9.1338e-131/PREDICTED: uncharacterized protein LOC100246969 [Vitis vinifera]
Pbr002756.1	2313	61	12	4.99107	1.03201	-2.27389	Down	9.8106e-09	7.69436e-08	K06685|1|1e-27|123|ath:AT4G19050|maintenance of ploidy protein MOB1 (MPS1 binder 1);K13459|5|1e-26|120|rcu:RCOM_1047690|disease resistance protein RPS2	-	-	-	gi|296089409|emb|CBI39228.3|/1.50532e-152/unnamed protein product [Vitis vinifera]
Pbr020753.1	807	66	13	15.4778	3.20442	-2.27207	Down	2.43066e-09	2.01637e-08	-	GO:0009536//plastid	-	-	gi|255556892|ref|XP_002519479.1|/7.54721e-66/conserved hypothetical protein [Ricinus communis]
Pbr024839.1	1062	643	127	114.584	23.788	-2.2681	Down	1.57974e-78	8.23306e-77	-	-	-	-	gi|225461324|ref|XP_002284551.1|/2.49386e-68/PREDICTED: uncharacterized protein LOC100267532 [Vitis vinifera]
Pbr024706.1	3285	86	17	4.95453	1.02942	-2.26691	Down	9.37384e-12	9.39758e-11	K06685|1|2e-27|123|ath:AT4G19050|maintenance of ploidy protein MOB1 (MPS1 binder 1)	-	-	-	gi|147834354|emb|CAN69843.1|/0/hypothetical protein VITISV_019700 [Vitis vinifera]
Pbr033263.1	1692	91	18	10.1784	2.11617	-2.26598	Down	2.34646e-12	2.46934e-11	K14181|1|0.0|652|vvi:100256880|valencene synthase [EC:4.2.3.73];K12929|2|7e-133|472|rcu:RCOM_1574190|casbene synthase [EC:4.2.3.8];K14184|5|2e-118|424|ath:AT5G23960|alpha-humulene/beta-caryophyllene synthase [EC:4.2.3.- 4.2.3.57]	-	-	-	gi|332320562|sp|O23945.2|PINS_FRAVE/0/RecName: Full=(-)-alpha-pinene synthase; Short=FvPINS
Pbr013606.1	1836	581	115	59.8884	12.4596	-2.26502	Down	5.24812e-71	2.44993e-69	K05391|1|0.0|724|sbi:SORBI_04g009250|cyclic nucleotide gated channel, other eukaryote	GO:0031224//intrinsic to membrane	GO:0005249//voltage-gated potassium channel activity;GO:0005515//protein binding;GO:0005217//intracellular ligand-gated ion channel activity;GO:0000166//nucleotide binding	GO:0070838//divalent metal ion transport	gi|242064678|ref|XP_002453628.1|/0/hypothetical protein SORBIDRAFT_04g009250 [Sorghum bicolor]
Pbr032418.2	1983	227	45	21.6642	4.51408	-2.26281	Down	1.10696e-28	2.35252e-27	K13430|1|7e-52|203|zma:100283091|serine/threonine-protein kinase PBS1 [EC:2.7.11.1]	-	GO:0004672//protein kinase activity	-	gi|255555031|ref|XP_002518553.1|/0/ATP binding protein, putative [Ricinus communis]
Pbr042146.1	1560	402	80	48.7686	10.201	-2.25724	Down	1.92225e-49	6.61142e-48	K01058|1|3e-73|274|mtr:MTR_7g081620|phospholipase A1 [EC:3.1.1.32]	-	GO:0004091//carboxylesterase activity	GO:0044238//primary metabolic process	gi|359483651|ref|XP_003632993.1|/0/PREDICTED: LOW QUALITY PROTEIN: phospholipase A1-Igamma1, chloroplastic-like [Vitis vinifera]
Pbr019738.1	675	2401	478	673.174	140.865	-2.25667	Down	2.06178e-286	4.26554e-284	-	-	-	-	gi|302398685|gb|ADL36637.1|/6.64648e-72/C2H2L domain class transcription factor [Malus x domestica]
Pbr018920.1	2079	622	124	56.6207	11.8644	-2.25469	Down	1.75842e-75	8.76288e-74	K14494|1|1e-45|182|ppp:PHYPADRAFT_235432|DELLA protein	-	-	-	gi|302399055|gb|ADL36822.1|/0/SCL domain class transcription factor [Malus x domestica]
Pbr029733.1	1668	50	10	5.673	1.19257	-2.25004	Down	2.65312e-07	1.7837e-06	K14181|1|1e-159|561|vvi:100256880|valencene synthase [EC:4.2.3.73];K12929|2|7e-120|429|rcu:RCOM_1574380|casbene synthase [EC:4.2.3.8];K14184|5|2e-102|371|ath:AT5G23960|alpha-humulene/beta-caryophyllene synthase [EC:4.2.3.- 4.2.3.57]	-	-	-	gi|359493937|ref|XP_003634696.1|/9.77744e-180/PREDICTED: (-)-germacrene D synthase [Vitis vinifera]
Pbr009140.1	6165	40	8	1.22791	0.258129	-2.25004	Down	4.45246e-06	2.56578e-05	K13420|1|2e-66|254|pop:POPTR_1075175|LRR receptor-like serine/threonine-protein kinase FLS2 [EC:2.7.11.1]	-	-	-	gi|225466147|ref|XP_002270042.1|/0/PREDICTED: LRR receptor-like serine/threonine-protein kinase GSO1-like [Vitis vinifera]
Pbr018965.1	1215	190	38	29.5949	6.22138	-2.25004	Down	4.29302e-24	7.8789e-23	K14497|1|6e-123|439|pop:POPTR_768154|protein phosphatase 2C [EC:3.1.3.16]	GO:0043234//protein complex	GO:0004721//phosphoprotein phosphatase activity;GO:0043169//cation binding	GO:0006464//cellular protein modification process	gi|224106389|ref|XP_002314150.1|/6.1547e-122/predicted protein [Populus trichocarpa]
Pbr019843.1	2937	45	9	2.89966	0.609562	-2.25004	Down	1.08388e-06	6.7858e-06	K05387|1|0.0|776|ath:AT2G29110|glutamate receptor, ionotropic, other eukaryote	GO:0044464//cell part	GO:0005215//transporter activity	-	gi|224142043|ref|XP_002324368.1|/0/glutamate-gated kainate-type ion channel receptor subunit GluR5 [Populus trichocarpa]
Pbr013454.1	2760	30	6	2.05708	0.432436	-2.25004	Down	7.6857e-05	0.00036842	K00423|1|2e-57|222|ppp:PHYPADRAFT_163787|L-ascorbate oxidase [EC:1.10.3.3]	GO:0005576//extracellular region	GO:0046914//transition metal ion binding;GO:0016682//oxidoreductase activity, acting on diphenols and related substances as donors, oxygen as acceptor	GO:0009808//lignin metabolic process	gi|186461211|gb|ACC78283.1|/0/putative laccase [Rosa hybrid cultivar]
Pbr023951.1	3654	204	41	10.5658	2.232	-2.24299	Down	1.14715e-25	2.20151e-24	K06685|1|9e-25|114|pop:POPTR_554110|maintenance of ploidy protein MOB1 (MPS1 binder 1)	-	-	-	gi|28555894|emb|CAD45029.1|/1.27623e-79/NBS-LRR disease resistance protein homologue [Hordeum vulgare]
Pbr037986.1	1140	338	68	56.1114	11.8654	-2.24153	Down	1.74425e-41	5.09453e-40	-	-	-	-	gi|255548209|ref|XP_002515161.1|/6.39205e-41/conserved hypothetical protein [Ricinus communis]
Pbr021047.1	849	89	18	19.8391	4.21739	-2.23392	Down	6.2727e-12	6.36571e-11	K09286|1|3e-30|130|pop:POPTR_571923|EREBP-like factor	-	-	GO:0048827//phyllome development;GO:0009987//cellular process;GO:0009793//embryo development ending in seed dormancy	gi|292668917|gb|ADE41113.1|/2.24619e-148/AP2 domain class transcription factor [Malus x domestica]
Pbr002760.1	2352	59	12	4.74738	1.0149	-2.22579	Down	2.63584e-08	1.9759e-07	K13457|1|1e-26|120|vvi:100252764|disease resistance protein RPM1;K06685|2|4e-25|115|aly:ARALYDRAFT_492950|maintenance of ploidy protein MOB1 (MPS1 binder 1)	-	-	-	gi|147834354|emb|CAN69843.1|/2.62602e-144/hypothetical protein VITISV_019700 [Vitis vinifera]
Pbr002343.1	2205	206	42	17.6806	3.78896	-2.2223	Down	1.25565e-25	2.40298e-24	K04733|1|2e-51|202|smo:SELMODRAFT_230241|interleukin-1 receptor-associated kinase 4 [EC:2.7.11.1];K13429|3|4e-49|194|sbi:SORBI_02g029560|chitin elicitor receptor kinase 1;K00924|4|4e-48|191|aly:ARALYDRAFT_313416|[EC:2.7.1.-];K13416|5|2e-47|189|rcu:RCOM_1534760|brassinosteroid insensitive 1-associated receptor kinase 1 [EC:2.7.10.1 2.7.11.1]	-	GO:0016301//kinase activity	-	gi|224053050|ref|XP_002297682.1|/7.80482e-167/predicted protein [Populus trichocarpa]
Pbr024634.1	726	49	10	12.7732	2.73995	-2.22089	Down	4.34864e-07	2.84244e-06	-	-	-	-	gi|224143756|ref|XP_002325063.1|/1.96911e-19/predicted protein [Populus trichocarpa]
Pbr027510.1	216	1738	355	1522.77	326.929	-2.21965	Down	1.04941e-203	1.40482e-201	-	-	-	-	gi|224108575|ref|XP_002314896.1|/1.0126e-11/predicted protein [Populus trichocarpa]
Pbr004962.1	375	923	189	465.811	100.256	-2.21606	Down	7.62198e-109	5.61048e-107	-	-	-	-	gi|255544268|ref|XP_002513196.1|/2.59615e-07/conserved hypothetical protein [Ricinus communis]
Pbr017196.1	2061	234	48	21.4871	4.63279	-2.21351	Down	8.98132e-29	1.91468e-27	K12843|1|1e-62|239|vvi:100248403|U4/U6 small nuclear ribonucleoprotein PRP3;K05681|2|1e-61|236|cme:CMS467C|ATP-binding cassette, subfamily G (WHITE), member 2;K02065|4|5e-17|88.2|mtr:MTR_7g079540|putative ABC transport system ATP-binding protein	GO:0044464//cell part	GO:0017111//nucleoside-triphosphatase activity;GO:0015604//organic phosphonate transmembrane transporter activity;GO:0032559	GO:0009725//response to hormone stimulus;GO:0009207;GO:0006970//response to osmotic stress	gi|356543642|ref|XP_003540269.1|/0/PREDICTED: ABC transporter G family member 15-like [Glycine max]
Pbr024467.1	693	433	89	118.248	25.5468	-2.2106	Down	8.053e-52	2.8561e-50	K09286|1|5e-34|142|rcu:RCOM_0546450|EREBP-like factor	-	-	GO:0042221//response to chemical stimulus	gi|292668887|gb|ADE41098.1|/6.35176e-73/AP2 domain class transcription factor [Malus x domestica]
Pbr009312.1	1089	34	7	5.90868	1.27864	-2.20822	Down	3.02772e-05	0.000155071	-	-	-	-	gi|147794347|emb|CAN62770.1|/1.48924e-108/hypothetical protein VITISV_027108 [Vitis vinifera]
Pbr014709.1	3273	762	157	44.0604	9.54186	-2.20714	Down	9.9441e-90	5.92933e-88	-	GO:0043234//protein complex	GO:0019787//small conjugating protein ligase activity	GO:0032446//protein modification by small protein conjugation	gi|224107933|ref|XP_002314659.1|/0/predicted protein [Populus trichocarpa]
Pbr012635.1	1539	383	79	47.0976	10.211	-2.20553	Down	6.72068e-46	2.18494e-44	K12134|1|8e-29|126|aly:ARALYDRAFT_904154|circadian clock associated 1;K12133|3|3e-26|118|ath:AT1G01060|LATE ELONGATED HYPOCOTYL	-	-	-	gi|359476477|ref|XP_002267976.2|/2.81012e-109/PREDICTED: uncharacterized protein LOC100263252 [Vitis vinifera]
Pbr040197.1	1446	63	13	8.24539	1.78836	-2.20495	Down	1.06479e-08	8.31999e-08	-	GO:0044464//cell part	GO:0004091//carboxylesterase activity	GO:0044238//primary metabolic process	gi|118485815|gb|ABK94755.1|/1.7133e-169/unknown [Populus trichocarpa]
Pbr024076.1	816	63	13	14.6113	3.16908	-2.20495	Down	1.06479e-08	8.31761e-08	K12135|1|3e-08|57.4|ath:AT5G15840|zinc finger protein CONSTANS	-	GO:0005488//binding	GO:0006351//transcription, DNA-dependent;GO:0009743//response to carbohydrate stimulus;GO:0009411//response to UV	gi|302398747|gb|ADL36668.1|/6.79481e-115/COL domain class transcription factor [Malus x domestica]
Pbr018290.1	642	63	13	18.5714	4.02798	-2.20495	Down	1.06479e-08	8.31523e-08	-	GO:0005576//extracellular region;GO:0030312//external encapsulating structure	GO:0046914//transition metal ion binding;GO:0004871//signal transducer activity	GO:0009755//hormone-mediated signaling pathway	gi|18203684|sp|Q9ZRA4.1|AB19A_PRUPE/7.6279e-75/RecName: Full=Auxin-binding protein ABP19a; Flags: Precursor
Pbr024859.1	918	63	13	12.9878	2.81696	-2.20495	Down	1.06479e-08	8.31285e-08	-	GO:0031090//organelle membrane	GO:0016741	GO:0006730//one-carbon metabolic process	gi|224128428|ref|XP_002329159.1|/2.56631e-116/predicted protein [Populus trichocarpa]
Pbr029704.1	1995	92	19	8.72738	1.89448	-2.20375	Down	4.1708e-12	4.29813e-11	-	-	-	-	gi|224094719|ref|XP_002310206.1|/2.25423e-133/predicted protein [Populus trichocarpa]
Pbr038104.1	807	53	11	12.4291	2.71143	-2.1966	Down	1.74535e-07	1.19819e-06	K00065|1|5e-14|76.3|rcu:RCOM_2018270|2-deoxy-D-gluconate 3-dehydrogenase [EC:1.1.1.125];K13237|2|3e-13|73.6|pop:POPTR_570603|peroxisomal 2,4-dienoyl-CoA reductase [EC:1.3.1.34];K09841|4|1e-11|68.2|bdi:100827045|xanthoxin dehydrogenase [EC:1.1.1.288]	GO:0042579//microbody	GO:0003824//catalytic activity	GO:0008152//metabolic process	gi|167374779|gb|ABZ79222.1|/1.22683e-116/alcohol dehydrogenase [Prunus armeniaca]
Pbr037727.1	2718	53	11	3.69033	0.80505	-2.1966	Down	1.74535e-07	1.19788e-06	K08286|1|1e-106|385|aly:ARALYDRAFT_491919|protein-serine/threonine kinase [EC:2.7.11.-];K13420|3|6e-106|384|pop:POPTR_1075175|LRR receptor-like serine/threonine-protein kinase FLS2 [EC:2.7.11.1]	GO:0016020//membrane	GO:0016740//transferase activity	-	gi|225456159|ref|XP_002278561.1|/0/PREDICTED: probable LRR receptor-like serine/threonine-protein kinase At4g08850-like [Vitis vinifera]
Pbr032764.1	690	77	16	21.1194	4.61265	-2.1949	Down	2.66604e-10	2.40207e-09	K09286|1|1e-53|207|ath:AT4G25480|EREBP-like factor	GO:0043231//intracellular membrane-bounded organelle	GO:0003676//nucleic acid binding;GO:0001071//nucleic acid binding transcription factor activity	GO:0006351//transcription, DNA-dependent	gi|292668937|gb|ADE41123.1|/4.31921e-106/AP2 domain class transcription factor [Malus x domestica]
Pbr040203.1	849	308	64	68.6566	14.9952	-2.1949	Down	5.19926e-37	1.36789e-35	K08235|1|3e-133|472|vvi:100241119|xyloglucan:xyloglucosyl transferase [EC:2.4.1.207];K14504|2|4e-133|472|vvi:100256520|xyloglucan:xyloglucosyl transferase TCH4 [EC:2.4.1.207]	GO:0005576//extracellular region;GO:0030312//external encapsulating structure	GO:0016798//hydrolase activity, acting on glycosyl bonds;GO:0016758//transferase activity, transferring hexosyl groups	GO:0044042//glucan metabolic process	gi|22947852|gb|AAN07898.1|/5.89735e-157/xyloglucan endotransglycosylase [Malus x domestica]
Pbr013502.1	1641	404	84	46.5921	10.1824	-2.19401	Down	5.04992e-48	1.68592e-46	-	-	-	-	gi|302398999|gb|ADL36794.1|/0/NAC domain class transcription factor [Malus x domestica]
Pbr005817.1	705	638	133	171.266	37.5268	-2.19024	Down	1.03883e-74	5.13011e-73	-	-	-	-	gi|359492270|ref|XP_003634392.1|/2.97024e-09/PREDICTED: uncharacterized protein LOC100249003 [Vitis vinifera]
Pbr032909.1	1692	177	37	19.7976	4.34991	-2.18626	Down	8.2115e-22	1.38939e-20	-	GO:0043231//intracellular membrane-bounded organelle	-	-	gi|359480059|ref|XP_002269886.2|/0/PREDICTED: uncharacterized protein LOC100249779 [Vitis vinifera]
Pbr027311.1	1542	191	40	23.4416	5.16006	-2.18361	Down	2.1787e-23	3.91693e-22	K14181|1|8e-160|561|vvi:100256880|valencene synthase [EC:4.2.3.73];K12929|2|5e-117|419|rcu:RCOM_1574190|casbene synthase [EC:4.2.3.8];K14184|5|5e-106|383|ath:AT5G23960|alpha-humulene/beta-caryophyllene synthase [EC:4.2.3.- 4.2.3.57]	-	-	-	gi|332320562|sp|O23945.2|PINS_FRAVE/0/RecName: Full=(-)-alpha-pinene synthase; Short=FvPINS
Pbr005043.1	336	143	30	80.5445	17.7608	-2.18109	Down	7.53324e-18	1.08333e-16	K10418|1|2e-19|92.0|smo:SELMODRAFT_131219|dynein light chain LC8-type	GO:0015630//microtubule cytoskeleton	GO:0003774//motor activity	GO:0009987//cellular process	gi|225461306|ref|XP_002281713.1|/5.05167e-43/PREDICTED: dynein light chain LC6, flagellar outer arm [Vitis vinifera]
Pbr042867.1	1131	352	74	58.9005	13.0151	-2.17809	Down	1.10125e-41	3.22684e-40	K01090|1|3e-82|303|sbi:SORBI_01g038410|protein phosphatase [EC:3.1.3.16];K14497|2|5e-40|163|zma:100381666|protein phosphatase 2C [EC:3.1.3.16]	-	GO:0004721//phosphoprotein phosphatase activity	-	gi|255560357|ref|XP_002521194.1|/8.9124e-120/protein phosphatase 2c, putative [Ricinus communis]
Pbr024056.2	732	252	53	65.1521	14.4027	-2.17747	Down	2.81456e-30	6.24901e-29	-	-	-	-	gi|224133658|ref|XP_002321629.1|/6.83099e-44/predicted protein [Populus trichocarpa]
Pbr040700.1	924	95	20	19.4577	4.30564	-2.17604	Down	2.75766e-12	2.89205e-11	K15104|1|3e-116|416|vvi:100245527|solute carrier family 25 (mitochondrial oxoglutarate transporter), member 11	GO:0043231//intracellular membrane-bounded organelle;GO:0016020//membrane	-	GO:0006810//transport;GO:0009987//cellular process	gi|225459119|ref|XP_002285693.1|/2.86839e-115/PREDICTED: probable mitochondrial 2-oxoglutarate/malate carrier protein-like [Vitis vinifera]
Pbr012480.1	975	57	12	11.0639	2.44825	-2.17604	Down	7.00862e-08	5.03018e-07	-	-	-	-	gi|225452173|ref|XP_002270738.1|/1.73086e-57/PREDICTED: uncharacterized protein LOC100249110 [Vitis vinifera]
Pbr041497.1	1341	795	168	112.196	24.9207	-2.17061	Down	1.21026e-91	7.37744e-90	K14497|1|3e-142|503|rcu:RCOM_1046460|protein phosphatase 2C [EC:3.1.3.16]	-	GO:0004721//phosphoprotein phosphatase activity	-	gi|255546071|ref|XP_002514095.1|/3.0351e-141/protein phosphatase 2c, putative [Ricinus communis]
Pbr011911.1	852	1893	401	420.485	93.6233	-2.16711	Down	3.2371e-215	4.83071e-213	K12581|1|7e-79|291|gmx:100789409|CCR4-NOT transcription complex subunit 7/8	GO:0043231//intracellular membrane-bounded organelle	GO:0000175//3'-5'-exoribonuclease activity;GO:0005488//binding	GO:0006950//response to stress;GO:0016070//RNA metabolic process	gi|224131812|ref|XP_002328114.1|/3.06888e-129/predicted protein [Populus trichocarpa]
Pbr009529.1	2421	301	64	23.5294	5.25853	-2.16173	Down	1.49184e-35	3.77928e-34	K00924|1|1e-71|270|osa:4333525|[EC:2.7.1.-]	-	GO:0004672//protein kinase activity;GO:0032559	GO:0006464//cellular protein modification process	gi|356501160|ref|XP_003519396.1|/0/PREDICTED: putative serine/threonine-protein kinase-like protein CCR3-like [Glycine max]
Pbr022861.2	1149	893	190	147.086	32.8937	-2.16077	Down	3.81264e-102	2.60951e-100	-	-	-	-	gi|225430856|ref|XP_002269123.1|/1.23609e-108/PREDICTED: uncharacterized protein LOC100251398 [Vitis vinifera]
Pbr037374.1	654	103	22	29.8056	6.69151	-2.15518	Down	4.56386e-13	5.04185e-12	K11982|1|2e-06|50.4|sbi:SORBI_01g035310|E3 ubiquitin-protein ligase RNF115/126 [EC:6.3.2.19];K15692|2|9e-06|48.5|smo:SELMODRAFT_67002|E3 ubiquitin-protein ligase RNF13 [EC:6.3.2.19]	-	-	-	gi|224092033|ref|XP_002309447.1|/1.54323e-38/predicted protein [Populus trichocarpa]
Pbr030934.3	483	103	22	40.358	9.06056	-2.15518	Down	4.56386e-13	5.04389e-12	K06689|1|4e-27|118|vcn:VOLCADRAFT_80460|ubiquitin-conjugating enzyme E2 D/E [EC:6.3.2.19]	-	GO:0019787//small conjugating protein ligase activity	GO:0019941//modification-dependent protein catabolic process;GO:0032446//protein modification by small protein conjugation	gi|255554108|ref|XP_002518094.1|/2.94647e-27/ubiquitin-conjugating enzyme E2, putative [Ricinus communis]
Pbr005194.1	2478	70	15	5.34608	1.20412	-2.1505	Down	2.81652e-09	2.32095e-08	K04733|1|1e-63|243|smo:SELMODRAFT_159261|interleukin-1 receptor-associated kinase 4 [EC:2.7.11.1];K13417|3|4e-57|221|ath:AT2G13790|somatic embryogenesis receptor kinase 4 [EC:2.7.10.1 2.7.11.1];K13416|5|2e-56|219|ath:AT4G33430|brassinosteroid insensitive 1-associated receptor kinase 1 [EC:2.7.10.1 2.7.11.1]	-	GO:0005488//binding;GO:0004672//protein kinase activity	-	gi|147783087|emb|CAN77627.1|/0/hypothetical protein VITISV_029423 [Vitis vinifera]
Pbr039481.1	1764	196	42	21.0279	4.7362	-2.1505	Down	1.54691e-23	2.79211e-22	K00423|1|0.0|944|vvi:100251280|L-ascorbate oxidase [EC:1.10.3.3]	-	GO:0046914//transition metal ion binding;GO:0016682//oxidoreductase activity, acting on diphenols and related substances as donors, oxygen as acceptor	GO:0008152//metabolic process	gi|225436045|ref|XP_002275678.1|/0/PREDICTED: L-ascorbate oxidase-like [Vitis vinifera]
Pbr026267.1	1545	84	18	10.2894	2.31752	-2.1505	Down	7.10156e-11	6.68286e-10	K08900|1|3e-171|599|mtr:MTR_6g009540|mitochondrial chaperone BCS1	-	GO:0017111//nucleoside-triphosphatase activity;GO:0032559	-	gi|359488873|ref|XP_002275941.2|/0/PREDICTED: uncharacterized protein LOC100252565 [Vitis vinifera]
Pbr032894.2	3669	107	23	5.51919	1.24698	-2.14602	Down	1.85639e-13	2.10707e-12	K10999|1|0.0|1692|vvi:100241197|cellulose synthase A [EC:2.4.1.12]	GO:0016020//membrane	GO:0016757//transferase activity, transferring glycosyl groups	GO:0009987//cellular process	gi|297744201|emb|CBI37171.3|/0/unnamed protein product [Vitis vinifera]
Pbr001247.1	3549	465	100	24.7963	5.60497	-2.14534	Down	1.51794e-53	5.5792e-52	K06685|1|2e-12|73.6|aly:ARALYDRAFT_492950|maintenance of ploidy protein MOB1 (MPS1 binder 1)	-	-	-	gi|302398863|gb|ADL36726.1|/0/HD domain class transcription factor [Malus x domestica]
Pbr040746.1	1602	325	70	38.3937	8.6919	-2.14313	Down	7.26726e-38	1.94952e-36	K01051|1|7e-87|319|aly:ARALYDRAFT_494979|pectinesterase [EC:3.1.1.11]	GO:0016020//membrane;GO:0005618//cell wall	GO:0030234//enzyme regulator activity;GO:0004091//carboxylesterase activity	GO:0071555//cell wall organization	gi|119507463|dbj|BAF42039.1|/0/pectin methylesterase 2 [Pyrus communis]
Pbr040085.1	3006	320	69	20.1465	4.56604	-2.14152	Down	2.84024e-37	7.5159e-36	K08332|1|4e-11|68.9|vcn:VOLCADRAFT_41528|vacuolar protein 8	-	GO:0016874//ligase activity	-	gi|302143945|emb|CBI23050.3|/0/unnamed protein product [Vitis vinifera]
Pbr029602.1	3456	88	19	4.8189	1.0936	-2.13962	Down	2.8761e-11	2.79017e-10	K04733|1|4e-52|205|smo:SELMODRAFT_159261|interleukin-1 receptor-associated kinase 4 [EC:2.7.11.1];K00924|3|1e-48|193|aly:ARALYDRAFT_486409|[EC:2.7.1.-]	-	GO:0016301//kinase activity	-	gi|224148260|ref|XP_002336622.1|/9.25671e-165/predicted protein [Populus trichocarpa]
Pbr014160.1	1056	324	70	58.0658	13.186	-2.13868	Down	1.16848e-37	3.11925e-36	K13426|1|2e-15|81.3|vvi:100251862|WRKY transcription factor 29;K13424|4|2e-13|74.7|ath:AT2G38470|WRKY transcription factor 33	-	-	-	gi|224075078|ref|XP_002304549.1|/1.06739e-87/predicted protein [Populus trichocarpa]
Pbr020653.1	453	268	58	111.963	25.4688	-2.13622	Down	2.23594e-31	5.11401e-30	-	GO:0043231//intracellular membrane-bounded organelle	GO:0003677//DNA binding;GO:0001071//nucleic acid binding transcription factor activity;GO:0005515//protein binding	GO:0006351//transcription, DNA-dependent;GO:0006952//defense response;GO:0009743//response to carbohydrate stimulus	gi|302399129|gb|ADL36859.1|/2.6549e-26/WRKY domain class transcription factor [Malus x domestica]
Pbr015363.1	846	60	13	13.4221	3.0567	-2.13456	Down	4.56178e-08	3.34347e-07	-	-	-	-	gi|224091959|ref|XP_002309417.1|/4.61404e-61/NAC domain protein, IPR003441 [Populus trichocarpa]
Pbr004726.1	918	383	83	78.9578	17.9852	-2.13427	Down	4.09944e-44	1.28238e-42	-	-	GO:0004672//protein kinase activity	-	gi|302144226|emb|CBI23450.3|/1.48109e-55/unnamed protein product [Vitis vinifera]
Pbr010908.1	3243	313	68	18.2657	4.17101	-2.13067	Down	2.86622e-36	7.42634e-35	K03695|1|1e-08|61.2|bdi:100825913|ATP-dependent Clp protease ATP-binding subunit ClpB;K03696|2|1e-08|61.2|cme:CMV107C|ATP-dependent Clp protease ATP-binding subunit ClpC	-	-	-	gi|255585368|ref|XP_002533380.1|/0/conserved hypothetical protein [Ricinus communis]
Pbr012305.1	2349	451	98	36.3356	8.29894	-2.13039	Down	1.53671e-51	5.42197e-50	K00924|1|9e-63|240|aly:ARALYDRAFT_486409|[EC:2.7.1.-];K04733|4|1e-55|216|ath:AT5G38990|interleukin-1 receptor-associated kinase 4 [EC:2.7.11.1]	-	GO:0004674//protein serine/threonine kinase activity;GO:0000166//nucleotide binding	-	gi|255558508|ref|XP_002520279.1|/0/ATP binding protein, putative [Ricinus communis]
Pbr001707.1	1197	543	118	85.8509	19.6095	-2.13028	Down	1.04348e-61	4.23423e-60	K01090|1|1e-120|431|osa:4337723|protein phosphatase [EC:3.1.3.16]	GO:0043234//protein complex	GO:0004721//phosphoprotein phosphatase activity;GO:0043169//cation binding	GO:0006464//cellular protein modification process	gi|356534653|ref|XP_003535867.1|/9.18402e-163/PREDICTED: probable protein phosphatase 2C 49-like [Glycine max]
Pbr016450.1	783	2263	492	546.968	124.992	-2.12962	Down	2.49284e-251	4.30867e-249	-	-	-	-	gi|225440213|ref|XP_002283659.1|/2.55102e-47/PREDICTED: uncharacterized protein LOC100255095 [Vitis vinifera]
Pbr009069.1	780	147	32	35.6666	8.16084	-2.12778	Down	8.53996e-18	1.22232e-16	K14484|1|2e-65|247|ath:AT3G23050|auxin-responsive protein IAA	GO:0043231//intracellular membrane-bounded organelle	GO:0005515//protein binding	GO:0009755//hormone-mediated signaling pathway	gi|113700397|gb|ABI36487.1|/7.53811e-84/AUX/IAA7 A [Malus x domestica]
Pbr024409.1	1095	4372	952	755.623	172.943	-2.12737	Down	0	0	K01673|1|2e-97|354|gmx:100781868|carbonic anhydrase [EC:4.2.1.1]	GO:0009532//plastid stroma	GO:0046914//transition metal ion binding;GO:0016836//hydro-lyase activity	-	gi|115471|sp|P17067.1|CAHC_PEA/9.13196e-98/RecName: Full=Carbonic anhydrase, chloroplastic; AltName: Full=Carbonate dehydratase; Contains: RecName: Full=Carbonic anhydrase, 27 kDa isoform; Contains: RecName: Full=Carbonic anhydrase, 25 kDa isoform; Flags: Precursor
Pbr011136.1	480	344	75	135.63	31.0813	-2.12556	Down	1.37425e-39	3.82954e-38	K01834|1|1e-56|216|vvi:100245371|2,3-bisphosphoglycerate-dependent phosphoglycerate mutase [EC:5.4.2.1];K03036|2|9e-23|103|aly:ARALYDRAFT_336019|26S proteasome regulatory subunit N6	GO:0044421//extracellular region part	-	-	gi|86156028|gb|ABC86745.1|/1.04243e-56/pollen-specific protein [Vitis pseudoreticulata]
Pbr035768.1	789	582	127	139.6	32.0189	-2.1243	Down	8.659e-66	3.73568e-64	-	-	-	-	gi|224074195|ref|XP_002304296.1|/3.83964e-67/predicted protein [Populus trichocarpa]
Pbr036744.1	1389	32	7	4.36	1.00248	-2.12076	Down	8.07754e-05	0.000385713	K13289|1|2e-115|414|mtr:MTR_4g021500|cathepsin A (carboxypeptidase C) [EC:3.4.16.5];K09756|3|9e-104|375|ath:AT5G09640|serine carboxypeptidase-like 19 [EC:3.4.16.- 2.3.1.91]	-	GO:0004180//carboxypeptidase activity	-	gi|224056272|ref|XP_002298786.1|/6.84467e-152/predicted protein [Populus trichocarpa]
Pbr019030.1	999	2102	461	398.205	91.7941	-2.11704	Down	7.50786e-232	1.20607e-229	K13424|1|5e-18|90.1|osa:4327518|WRKY transcription factor 33	-	-	-	gi|259121383|gb|ACV92011.1|/5.38134e-78/WRKY transcription factor 9 [(Populus tomentosa x P. bolleana) x P. tomentosa]
Pbr027927.1	804	41	9	9.65088	2.22672	-2.11574	Down	7.6858e-06	4.27913e-05	K00799|1|8e-15|79.0|rcu:RCOM_0324140|glutathione S-transferase [EC:2.5.1.18]	-	-	-	gi|255558562|ref|XP_002520306.1|/4.33397e-114/ganglioside-induced differentiation-associated protein 1, 2 gdap, putative [Ricinus communis]
Pbr003671.1	813	623	137	145.023	33.5204	-2.11317	Down	7.59692e-70	3.49266e-68	-	-	-	-	gi|225468805|ref|XP_002263365.1|/5.54712e-101/PREDICTED: GEM-like protein 5 [Vitis vinifera]
Pbr025274.1	975	100	22	19.4104	4.48846	-2.11254	Down	1.91255e-12	2.03071e-11	K04125|1|4e-138|489|pop:POPTR_550316|gibberellin 2-oxidase [EC:1.14.11.13]	-	GO:0003824//catalytic activity;GO:0046914//transition metal ion binding	GO:0008152//metabolic process	gi|255040359|gb|ACT99992.1|/6.58896e-166/gibberellin 2-oxidase [Malus x domestica]
Pbr015221.1	456	59	13	24.4865	5.67098	-2.11032	Down	7.36996e-08	5.27565e-07	K12655|1|4e-07|52.0|smo:SELMODRAFT_63572|OTU domain-containing protein 5 [EC:3.1.2.15];K13719|2|1e-06|50.1|cre:CHLREDRAFT_119384|ubiquitin thioesterase OTU1 [EC:3.1.2.-]	GO:0043231//intracellular membrane-bounded organelle	GO:0016787//hydrolase activity	-	gi|255547784|ref|XP_002514949.1|/9.82504e-64/OTU domain-containing protein 6B, putative [Ricinus communis]
Pbr028796.1	1686	299	66	33.5624	7.78692	-2.10772	Down	2.89238e-34	7.12245e-33	K13416|1|5e-52|204|rcu:RCOM_1534760|brassinosteroid insensitive 1-associated receptor kinase 1 [EC:2.7.10.1 2.7.11.1];K13418|2|8e-52|203|pop:POPTR_913861|somatic embryogenesis receptor kinase 1 [EC:2.7.10.1 2.7.11.1]	-	GO:0004871//signal transducer activity;GO:0004672//protein kinase activity;GO:0032559	GO:0006464//cellular protein modification process	gi|359472674|ref|XP_002279652.2|/4.67015e-129/PREDICTED: probable receptor-like protein kinase At1g67000-like [Vitis vinifera]
Pbr019863.1	2313	257	57	21.0279	4.90206	-2.10085	Down	1.48984e-29	3.24709e-28	K15084|1|7e-116|416|gmx:100800243|solute carrier family 25 (mitochondrial carrier protein), member 16	GO:0019866//organelle inner membrane;GO:0031224//intrinsic to membrane	-	GO:0046907//intracellular transport	gi|255550073|ref|XP_002516087.1|/2.6695e-133/Grave disease carrier protein, putative [Ricinus communis]
Pbr028738.1	780	486	108	117.918	27.5428	-2.09804	Down	2.24872e-54	8.34379e-53	K01807|1|6e-116|414|pop:POPTR_640727|ribose 5-phosphate isomerase A [EC:5.3.1.6]	GO:0044424//intracellular part	GO:0016861//intramolecular oxidoreductase activity, interconverting aldoses and ketoses	GO:0006098//pentose-phosphate shunt;GO:0009628//response to abiotic stimulus;GO:0009250//glucan biosynthetic process;GO:0046108//uridine metabolic process;GO:0003006//developmental process involved in reproduction	gi|224058933|ref|XP_002299653.1|/6.32247e-115/predicted protein [Populus trichocarpa]
Pbr017949.1	1086	63	14	10.9787	2.56435	-2.09804	Down	2.95042e-08	2.20205e-07	-	GO:0016020//membrane	-	-	gi|225452466|ref|XP_002274501.1|/5.37327e-42/PREDICTED: CASP-like protein At2g36330-like [Vitis vinifera]
Pbr002681.1	609	216	48	67.1236	15.6785	-2.09804	Down	4.8532e-25	9.12783e-24	-	-	-	-	gi|255582685|ref|XP_002532121.1|/1.63006e-28/conserved hypothetical protein [Ricinus communis]
Pbr025370.1	1299	45	10	6.55605	1.53134	-2.09804	Down	3.04018e-06	1.79396e-05	K00942|1|1e-169|594|rcu:RCOM_0751830|guanylate kinase [EC:2.7.4.8]	-	GO:0016776//phosphotransferase activity, phosphate group as acceptor	GO:0009117//nucleotide metabolic process;GO:0006796//phosphate-containing compound metabolic process	gi|255577505|ref|XP_002529631.1|/1.25956e-168/guanylate kinase, putative [Ricinus communis]
Pbr042691.1	1608	117	26	13.7702	3.21637	-2.09804	Down	3.22386e-14	3.82618e-13	K13457|1|3e-07|55.1|rcu:RCOM_0742270|disease resistance protein RPM1;K03013|2|4e-07|54.7|vvi:100258335|DNA-directed RNA polymerases I, II, and III subunit RPABC1	-	-	-	gi|302398863|gb|ADL36726.1|/4.56254e-134/HD domain class transcription factor [Malus x domestica]
Pbr018303.1	1530	2890	644	357.475	83.7286	-2.09405	Down	0	0	K05280|1|3e-118|424|vvi:100263810|flavonoid 3'-monooxygenase [EC:1.14.13.21]	-	GO:0016709//oxidoreductase activity, acting on paired donors, with incorporation or reduction of molecular oxygen, NADH or NADPH as one donor, and incorporation of one atom of oxygen;GO:0005506//iron ion binding	GO:0008152//metabolic process	gi|225442104|ref|XP_002273390.1|/0/PREDICTED: flavonoid 3'-monooxygenase-like [Vitis vinifera]
Pbr036723.1	315	85	19	51.0678	11.9984	-2.08958	Down	1.20007e-10	1.10869e-09	K15404|1|1e-13|72.8|ath:AT1G02205|aldehyde decarbonylase [EC:4.1.99.5]	GO:0031224//intrinsic to membrane	GO:0046914//transition metal ion binding;GO:0003824//catalytic activity	GO:0006633//fatty acid biosynthetic process;GO:0007275//multicellular organismal development;GO:0003006//developmental process involved in reproduction	gi|255574595|ref|XP_002528208.1|/6.75355e-40/sterol desaturase, putative [Ricinus communis]
Pbr014595.1	642	715	160	210.771	49.5752	-2.08798	Down	1.02696e-78	5.37264e-77	-	-	-	-	gi|225439608|ref|XP_002266957.1|/3.20478e-73/PREDICTED: protein LURP-one-related 15 [Vitis vinifera]
Pbr042643.1	543	478	107	166.597	39.1979	-2.08751	Down	3.56392e-53	1.29769e-51	K13430|1|7e-20|94.7|zma:100283091|serine/threonine-protein kinase PBS1 [EC:2.7.11.1];K04733|2|2e-19|93.6|smo:SELMODRAFT_33807|interleukin-1 receptor-associated kinase 4 [EC:2.7.11.1]	-	GO:0004871//signal transducer activity;GO:0030246//carbohydrate binding;GO:0004713//protein tyrosine kinase activity;GO:0004674//protein serine/threonine kinase activity;GO:0032559	GO:0006464//cellular protein modification process;GO:0008037//cell recognition	gi|255579600|ref|XP_002530641.1|/4.88454e-65/B-Raf proto-oncogene serine/threonine-protein kinase, putative [Ricinus communis]
Pbr037345.1	1704	98	22	10.8842	2.56822	-2.08339	Down	4.92954e-12	5.04009e-11	K08472|1|0.0|664|aly:ARALYDRAFT_480631|mlo protein	GO:0031224//intrinsic to membrane	-	GO:0009987//cellular process;GO:0006950//response to stress	gi|317457431|gb|ADV29809.1|/0/MLO1 protein [Malus toringoides]
Pbr028805.1	705	80	18	21.4753	5.07882	-2.08012	Down	4.77846e-10	4.20545e-09	-	GO:0005622//intracellular	GO:0005488//binding	-	gi|297737796|emb|CBI26997.3|/8.77874e-70/unnamed protein product [Vitis vinifera]
Pbr010521.1	2370	71	16	5.66956	1.34292	-2.07786	Down	4.74378e-09	3.82712e-08	K13176|1|2e-75|282|vvi:100256436|THO complex subunit 7	-	-	-	gi|332330342|gb|AEE43928.1|/8.88394e-116/TIR-NBS-LRR resistance protein muRdr1D [Rosa multiflora]
Pbr031537.1	576	164	37	53.8841	12.7779	-2.07621	Down	3.96046e-19	5.99868e-18	-	-	-	-	gi|255551211|ref|XP_002516652.1|/3.00419e-34/conserved hypothetical protein [Ricinus communis]
Pbr025360.1	825	1059	239	242.93	57.6266	-2.07573	Down	7.26336e-115	5.55617e-113	K09422|1|1e-62|237|pop:POPTR_559693|myb proto-oncogene protein, plant	-	-	-	gi|327412635|emb|CCA29106.1|/3.4798e-74/putative MYB transcription factor [Rosa rugosa]
Pbr025093.1	2394	1985	448	156.919	37.2249	-2.07568	Down	1.22749e-213	1.81197e-211	K13460|1|8e-21|100|ath:AT1G12220|disease resistance protein RPS5;K13457|2|7e-20|97.8|sbi:SORBI_10g028730|disease resistance protein RPM1;K13459|3|3e-18|92.4|aly:ARALYDRAFT_913954|disease resistance protein RPS2	-	-	-	gi|359480461|ref|XP_002268207.2|/0/PREDICTED: probable disease resistance protein At5g66900-like [Vitis vinifera]
Pbr035464.1	1533	31	7	3.827	0.908312	-2.07495	Down	0.000131022	0.000602065	K02132|1|0.0|952|vvi:7498514|F-type H+-transporting ATPase subunit alpha [EC:3.6.3.14]	GO:0043231//intracellular membrane-bounded organelle;GO:0019866//organelle inner membrane;GO:0033178//proton-transporting two-sector ATPase complex, catalytic domain	GO:0015078//hydrogen ion transmembrane transporter activity;GO:0019829//cation-transporting ATPase activity;GO:0032559	GO:0015986//ATP synthesis coupled proton transport;GO:0015988//energy coupled proton transmembrane transport, against electrochemical gradient	gi|404481694|ref|YP_006666125.1|/0/ATP1 (mitochondrion) [Malus x domestica]
Pbr033239.1	2529	217	49	16.2387	3.85413	-2.07495	Down	8.10094e-25	1.51216e-23	K04733|1|6e-147|520|ath:AT5G38990|interleukin-1 receptor-associated kinase 4 [EC:2.7.11.1];K00924|3|9e-66|250|osa:4333525|[EC:2.7.1.-]	GO:0016020//membrane	GO:0004672//protein kinase activity;GO:0032559	GO:0006468//protein phosphorylation;GO:0043401//steroid hormone mediated signaling pathway;GO:0001558//regulation of cell growth;GO:0000902//cell morphogenesis;GO:0007275//multicellular organismal development	gi|359493687|ref|XP_003634651.1|/0/PREDICTED: receptor-like protein kinase THESEUS 1-like [Vitis vinifera]
Pbr004906.1	1329	31	7	4.41444	1.04774	-2.07495	Down	0.000131022	0.000601964	K11159|1|0.0|695|vvi:100249903|carotenoid cleavage dioxygenase	-	GO:0016701//oxidoreductase activity, acting on single donors with incorporation of molecular oxygen	-	gi|194580053|gb|ACF75911.1|/0/carotenoid cleavage dioxygenases [Malus hupehensis var. mengshanensis]
Pbr012303.1	1710	349	79	38.625	9.18989	-2.07142	Down	6.82078e-39	1.86829e-37	K00924|1|9e-67|253|aly:ARALYDRAFT_486409|[EC:2.7.1.-];K04733|4|6e-58|223|ath:AT5G38990|interleukin-1 receptor-associated kinase 4 [EC:2.7.11.1]	-	GO:0004674//protein serine/threonine kinase activity;GO:0000166//nucleotide binding	-	gi|255558508|ref|XP_002520279.1|/0/ATP binding protein, putative [Ricinus communis]
Pbr019262.1	1026	66	15	12.1741	2.90819	-2.06562	Down	1.89819e-08	1.44475e-07	K09422|1|7e-103|372|vvi:100257755|myb proto-oncogene protein, plant	-	-	-	gi|302398933|gb|ADL36761.1|/1.7561e-172/MYB domain class transcription factor [Malus x domestica]
Pbr006210.1	2160	88	20	7.71024	1.84186	-2.06562	Down	7.75508e-11	7.27029e-10	K04733|1|2e-67|255|smo:SELMODRAFT_159261|interleukin-1 receptor-associated kinase 4 [EC:2.7.11.1];K13430|4|6e-53|207|sbi:SORBI_04g020990|serine/threonine-protein kinase PBS1 [EC:2.7.11.1]	-	GO:0004713//protein tyrosine kinase activity;GO:0032559	GO:0006464//cellular protein modification process	gi|359492647|ref|XP_002281968.2|/0/PREDICTED: proline-rich receptor-like protein kinase PERK13-like [Vitis vinifera]
Pbr039727.1	1101	66	15	11.3448	2.71009	-2.06562	Down	1.89819e-08	1.44516e-07	K00514|1|8e-28|122|rcu:RCOM_1428040|zeta-carotene desaturase [EC:1.3.5.6];K01206|2|2e-23|108|ath:AT1G67830|alpha-L-fucosidase [EC:3.2.1.51]	GO:0031410//cytoplasmic vesicle	GO:0016787//hydrolase activity	-	gi|147819180|emb|CAN78085.1|/1.19427e-121/hypothetical protein VITISV_034041 [Vitis vinifera]
Pbr016956.1	1440	145	33	19.0566	4.55859	-2.06363	Down	5.88298e-17	8.10178e-16	K06694|1|6e-11|67.4|mtr:MTR_5g043640|26S proteasome non-ATPase regulatory subunit 10	GO:0009536//plastid	GO:0017111//nucleoside-triphosphatase activity;GO:0032559	GO:0043170	gi|255546479|ref|XP_002514299.1|/0/Protein cbxX, chromosomal, putative [Ricinus communis]
Pbr024723.3	1815	386	88	40.2485	9.64463	-2.06114	Down	1.39396e-42	4.18785e-41	K13459|1|3e-17|88.6|rcu:RCOM_1047690|disease resistance protein RPS2;K13457|2|7e-17|87.4|zma:606485|disease resistance protein RPM1	-	-	GO:0050896//response to stimulus	gi|302398845|gb|ADL36717.1|/0/HD domain class transcription factor [Malus x domestica]
Pbr035319.2	2073	307	70	28.0271	6.71704	-2.06092	Down	3.44374e-34	8.45729e-33	K04733|1|1e-64|246|aly:ARALYDRAFT_916421|interleukin-1 receptor-associated kinase 4 [EC:2.7.11.1];K00924|5|1e-40|166|aly:ARALYDRAFT_486409|[EC:2.7.1.-]	-	GO:0004672//protein kinase activity;GO:0000166//nucleotide binding	-	gi|242035605|ref|XP_002465197.1|/5.85457e-92/hypothetical protein SORBIDRAFT_01g033865 [Sorghum bicolor]
Pbr020001.1	990	197	45	37.6591	9.04184	-2.05831	Down	1.88891e-22	3.28144e-21	K13424|1|2e-18|91.3|zma:100279301|WRKY transcription factor 33	-	-	-	gi|112819971|gb|ABI23959.1|/4.20268e-75/WRKY transcription factor 2 [Gossypium hirsutum]
Pbr005848.1	1581	35	8	4.18963	1.00655	-2.0574	Down	5.10858e-05	0.000253011	K01179|1|3e-97|353|gmx:100101849|endoglucanase [EC:3.2.1.4]	GO:0016020//membrane;GO:0031410//cytoplasmic vesicle	GO:0004553//hydrolase activity, hydrolyzing O-glycosyl compounds	GO:0044238//primary metabolic process	gi|119507459|dbj|BAF42037.1|/0/cellulase2 [Pyrus communis]
Pbr001726.1	2598	188	43	13.6949	3.29237	-2.05644	Down	1.81114e-21	3.01587e-20	K06611|1|0.0|1445|vvi:100245269|stachyose synthetase [EC:2.4.1.67]	GO:0044424//intracellular part	GO:0008378//galactosyltransferase activity	GO:0009628//response to abiotic stimulus;GO:0009311//oligosaccharide metabolic process	gi|225437604|ref|XP_002271259.1|/0/PREDICTED: stachyose synthase [Vitis vinifera]
Pbr021041.1	1272	1866	427	277.628	66.776	-2.05575	Down	1.7448e-198	2.25823e-196	K09060|1|5e-139|492|vvi:100248302|plant G-box-binding factor	-	GO:0005488//binding	-	gi|359489695|ref|XP_002279966.2|/3.59049e-136/PREDICTED: common plant regulatory factor 1-like [Vitis vinifera]
Pbr042035.1	1659	458	105	52.2466	12.5899	-2.05307	Down	5.65298e-50	1.95414e-48	K08286|1|0.0|786|osa:4339288|protein-serine/threonine kinase [EC:2.7.11.-];K08790|2|0.0|776|pop:POPTR_761359|serine/threonine kinase 38 [EC:2.7.11.1]	-	GO:0004672//protein kinase activity;GO:0032559	GO:0006464//cellular protein modification process	gi|225444175|ref|XP_002271235.1|/0/PREDICTED: serine/threonine-protein kinase 38-like [Vitis vinifera]
Pbr026921.1	1659	87	20	9.92458	2.39808	-2.04913	Down	1.23969e-10	1.1449e-09	-	-	-	-	gi|255545349|ref|XP_002513735.1|/3.9165e-88/conserved hypothetical protein [Ricinus communis]
Pbr015975.1	1308	126	29	18.2306	4.41032	-2.04741	Down	8.79032e-15	1.08035e-13	K00924|1|4e-106|383|ath:AT1G30270|[EC:2.7.1.-];K07198|3|2e-66|251|mtr:MTR_4g066710|5'-AMP-activated protein kinase, catalytic alpha subunit [EC:2.7.11.11]	GO:0043231//intracellular membrane-bounded organelle	GO:0005515//protein binding;GO:0004674//protein serine/threonine kinase activity;GO:0032559	GO:0050896//response to stimulus;GO:0006464//cellular protein modification process;GO:0023052//signaling	gi|225439649|ref|XP_002269923.1|/0/PREDICTED: CBL-interacting serine/threonine-protein kinase 14 isoform 1 [Vitis vinifera]
Pbr010235.1	2688	1154	266	81.2486	19.6848	-2.04526	Down	1.13203e-122	9.22821e-121	K13420|1|7e-83|307|sbi:SORBI_06g028760|LRR receptor-like serine/threonine-protein kinase FLS2 [EC:2.7.11.1]	-	-	-	gi|359488583|ref|XP_003633782.1|/0/PREDICTED: LRR receptor-like serine/threonine-protein kinase FLS2-like [Vitis vinifera]
Pbr026213.1	1680	195	45	21.9667	5.32823	-2.04359	Down	4.78582e-22	8.1634e-21	K10526|1|3e-119|427|vvi:100243654|OPC-8:0 CoA ligase 1 [EC:6.2.1.-]	-	GO:0016405//CoA-ligase activity	-	gi|356497603|ref|XP_003517649.1|/0/PREDICTED: 4-coumarate--CoA ligase-like 6-like [Glycine max]
Pbr031097.1	555	520	120	177.317	43.0098	-2.04359	Down	3.47352e-56	1.32115e-54	-	-	-	-	gi|224110514|ref|XP_002315543.1|/3.27802e-35/predicted protein [Populus trichocarpa]
Pbr004166.1	384	748	173	368.646	89.6178	-2.04038	Down	6.60138e-80	3.50053e-78	-	-	-	-	-
Pbr007980.1	927	2307	534	470.985	114.588	-2.03922	Down	2.15352e-242	3.586e-240	K05283|1|5e-14|76.6|aly:ARALYDRAFT_354960|phosphatidylinositol glycan, class W [EC:2.3.-.-];K11982|2|8e-09|59.3|sbi:SORBI_03g011120|E3 ubiquitin-protein ligase RNF115/126 [EC:6.3.2.19];K15692|3|1e-08|58.5|ppp:PHYPADRAFT_16563|E3 ubiquitin-protein ligase RNF13 [EC:6.3.2.19]	-	-	GO:0050896//response to stimulus	gi|225431784|ref|XP_002271292.1|/9.13275e-53/PREDICTED: RING-H2 finger protein ATL2-like isoform 2 [Vitis vinifera]
Pbr028934.1	1692	220	51	24.6072	5.99583	-2.03705	Down	1.38062e-24	2.56311e-23	K15442|1|1e-88|325|ppp:PHYPADRAFT_162271|tRNA-specific adenosine deaminase 3	-	-	-	gi|225450640|ref|XP_002278296.1|/6.51646e-147/PREDICTED: exopolyphosphatase [Vitis vinifera]
Pbr042000.1	183	112	26	115.826	28.2619	-2.03503	Down	3.36046e-13	3.74269e-12	-	GO:0031410//cytoplasmic vesicle	-	-	gi|224143520|ref|XP_002324983.1|/3.34409e-15/predicted protein [Populus trichocarpa]
Pbr028735.1	468	292	68	118.08	28.903	-2.03047	Down	5.27174e-32	1.23259e-30	-	-	-	-	gi|356575634|ref|XP_003555943.1|/8.98883e-31/PREDICTED: uncharacterized protein LOC100795681 [Glycine max]
Pbr040709.2	840	30	7	6.75898	1.65767	-2.02765	Down	0.000211474	0.000933432	-	-	-	-	gi|359479860|ref|XP_003632364.1|/5.62168e-27/PREDICTED: uncharacterized protein LOC100853168 [Vitis vinifera]
Pbr009416.1	1176	1980	462	318.638	78.1473	-2.02765	Down	8.54174e-207	1.17219e-204	K14497|1|8e-127|451|gmx:100776356|protein phosphatase 2C [EC:3.1.3.16]	-	GO:0019900//kinase binding;GO:0004721//phosphoprotein phosphatase activity	GO:0010118//stomatal movement;GO:0010359//regulation of anion channel activity;GO:0009738//abscisic acid mediated signaling pathway;GO:0006950//response to stress	gi|33309516|gb|AAQ03211.1|AF411074_1/8.96931e-155/protein phosphatase 2C [Prunus avium]
Pbr035549.1	3204	270	63	15.9482	3.91136	-2.02765	Down	1.1671e-29	2.55386e-28	K06685|1|1e-19|97.8|ath:AT4G19050|maintenance of ploidy protein MOB1 (MPS1 binder 1)	-	-	-	gi|225448053|ref|XP_002273151.1|/5.56699e-128/PREDICTED: TMV resistance protein N-like [Vitis vinifera]
Pbr012479.1	897	30	7	6.32948	1.55233	-2.02765	Down	0.000211474	0.000933281	-	-	-	-	gi|225452173|ref|XP_002270738.1|/3.17331e-55/PREDICTED: uncharacterized protein LOC100249110 [Vitis vinifera]
Pbr013608.1	1176	77	18	12.3915	3.0447	-2.02497	Down	1.95257e-09	1.63366e-08	K05391|1|4e-69|259|pop:POPTR_807853|cyclic nucleotide gated channel, other eukaryote	GO:0016020//membrane	GO:0005249//voltage-gated potassium channel activity;GO:0005515//protein binding;GO:0005217//intracellular ligand-gated ion channel activity	GO:0070838//divalent metal ion transport	gi|224118210|ref|XP_002317760.1|/1.2839e-68/predicted protein [Populus trichocarpa]
Pbr025607.1	798	64	15	15.1781	3.73911	-2.02122	Down	4.85394e-08	3.54618e-07	-	GO:0016020//membrane	-	GO:0009832//plant-type cell wall biogenesis	gi|30841338|gb|AAO92753.1|/5.14448e-51/arabinogalactan protein [Gossypium hirsutum]
Pbr007169.1	1551	200	47	24.4038	6.02789	-2.01738	Down	3.17546e-22	5.454e-21	-	-	-	-	gi|359491381|ref|XP_002267425.2|/0/PREDICTED: DUF246 domain-containing protein At1g04910-like [Vitis vinifera]
Pbr003131.1	465	319	75	129.831	32.0839	-2.01671	Down	1.58632e-34	3.93825e-33	K13448|1|2e-36|149|pop:POPTR_412211|calcium-binding protein CML	-	GO:0016491//oxidoreductase activity	-	gi|224087094|ref|XP_002308063.1|/2.14754e-53/predicted protein [Populus trichocarpa]
Pbr024538.1	453	34	8	14.2043	3.51294	-2.01558	Down	8.2167e-05	0.000391879	-	-	-	-	gi|225449056|ref|XP_002274887.1|/1.03062e-41/PREDICTED: monoglyceride lipase [Vitis vinifera]
Pbr041631.2	423	157	37	70.2422	17.3997	-2.01328	Down	1.02433e-17	1.46381e-16	K13457|1|3e-14|75.5|pop:POPTR_755797|disease resistance protein RPM1	-	GO:0000166//nucleotide binding	-	gi|400296111|gb|AFP82245.1|/7.7459e-44/NBS-LRR type disease resistance protein [Malus x domestica]
Pbr019873.1	1659	785	185	89.5493	22.1822	-2.01328	Down	2.3436e-82	1.27493e-80	K14861|1|1e-14|79.7|gmx:100777901|nucleolar pre-ribosomal-associated protein 1	GO:0031090//organelle membrane;GO:0009536//plastid	-	-	gi|225429570|ref|XP_002280033.1|/0/PREDICTED: uncharacterized protein LOC100262760 [Vitis vinifera]
Pbr028472.1	2682	377	89	26.6025	6.60101	-2.0108	Down	2.29958e-40	6.52799e-39	K04733|1|0.0|720|ath:AT5G38990|interleukin-1 receptor-associated kinase 4 [EC:2.7.11.1];K00924|3|2e-64|245|aly:ARALYDRAFT_486409|[EC:2.7.1.-]	GO:0044426;GO:0031410//cytoplasmic vesicle;GO:0016020//membrane	GO:0004871//signal transducer activity;GO:0004713//protein tyrosine kinase activity;GO:0032559	GO:0006952//defense response;GO:0006468//protein phosphorylation;GO:0009856//pollination;GO:0007275//multicellular organismal development	gi|224087891|ref|XP_002308259.1|/0/predicted protein [Populus trichocarpa]
Pbr002477.1	1008	656	155	123.164	30.588	-2.00954	Down	6.0153e-69	2.6974e-67	K14787|1|1e-12|72.4|vvi:100247562|multiple RNA-binding domain-containing protein 1;K13154|4|7e-12|69.7|rcu:RCOM_0721970|U11/U12 small nuclear ribonucleoprotein 31 kDa protein	GO:0043231//intracellular membrane-bounded organelle	GO:0003676//nucleic acid binding	-	gi|351721799|ref|NP_001235686.1|/9.12356e-33/uncharacterized protein LOC100305971 [Glycine max]
Pbr004891.1	1467	55	13	7.09531	1.76276	-2.00903	Down	4.88002e-07	3.17004e-06	-	GO:0009536//plastid	GO:0016740//transferase activity	-	gi|255539657|ref|XP_002510893.1|/0/Xyloglucan galactosyltransferase KATAMARI1, putative [Ricinus communis]
Pbr022745.1	1155	203	48	33.2624	8.26682	-2.00849	Down	2.04728e-22	3.54754e-21	K14497|1|5e-81|299|rcu:RCOM_1579770|protein phosphatase 2C [EC:3.1.3.16]	-	GO:0016787//hydrolase activity	-	gi|255545018|ref|XP_002513570.1|/5.45369e-80/protein phosphatase 2c, putative [Ricinus communis]
Pbr024390.1	450	80	19	33.6447	8.39886	-2.00211	Down	1.24624e-09	1.05793e-08	-	-	-	GO:0009553//embryo sac development;GO:0003006//developmental process involved in reproduction	gi|255575841|ref|XP_002528818.1|/4.09593e-27/conserved hypothetical protein [Ricinus communis]
Pbr012304.1	1362	105	25	14.5899	3.65126	-1.9985	Down	3.3354e-12	3.47791e-11	K13430|1|3e-21|101|zma:100283091|serine/threonine-protein kinase PBS1 [EC:2.7.11.1];K04733|4|7e-21|100|aly:ARALYDRAFT_916421|interleukin-1 receptor-associated kinase 4 [EC:2.7.11.1]	-	GO:0004672//protein kinase activity;GO:0032559	GO:0006464//cellular protein modification process	gi|255558508|ref|XP_002520279.1|/4.30011e-50/ATP binding protein, putative [Ricinus communis]
Pbr028789.1	1947	852	203	82.8157	20.74	-1.99749	Down	2.45412e-88	1.41991e-86	K04733|1|3e-54|211|smo:SELMODRAFT_159261|interleukin-1 receptor-associated kinase 4 [EC:2.7.11.1];K00924|3|4e-52|204|ath:AT1G24650|[EC:2.7.1.-]	GO:0016020//membrane	GO:0004713//protein tyrosine kinase activity;GO:0032559	GO:0006464//cellular protein modification process	gi|359472670|ref|XP_002279726.2|/5.90028e-163/PREDICTED: probable serine/threonine-protein kinase At1g18390 [Vitis vinifera]
Pbr018657.1	1113	46	11	7.82171	1.96597	-1.99224	Down	4.96236e-06	2.83805e-05	K15746|1|1e-117|421|rcu:RCOM_1582530|beta-carotene 3-hydroxylase [EC:1.14.13.129]	GO:0031224//intrinsic to membrane	GO:0046914//transition metal ion binding;GO:0003824//catalytic activity	GO:0006631//fatty acid metabolic process	gi|328909633|gb|AEB61491.1|/2.79876e-118/beta carotene hydroxylase-1 [Morus indica]
Pbr029606.1	1449	367	88	47.9332	12.0807	-1.98832	Down	8.71928e-39	2.38592e-37	K13367|1|0.0|768|aly:ARALYDRAFT_486367|non-specific polyamine oxidase [EC:1.5.3.17];K11450|3|6e-56|216|smo:SELMODRAFT_449015|lysine-specific histone demethylase 1 [EC:1.-.-.-]	-	GO:0016647//oxidoreductase activity, acting on the CH-NH group of donors, oxygen as acceptor	GO:0006595//polyamine metabolic process	gi|255561152|ref|XP_002521588.1|/0/amine oxidase, putative [Ricinus communis]
Pbr011176.1	555	383	92	130.601	32.9742	-1.98575	Down	2.42958e-40	6.88987e-39	-	-	-	-	gi|224110514|ref|XP_002315543.1|/8.62639e-36/predicted protein [Populus trichocarpa]
Pbr030284.1	339	387	93	216.048	54.5711	-1.98514	Down	9.92746e-41	2.85078e-39	-	-	GO:0043169//cation binding	GO:0006812//cation transport	gi|356532880|ref|XP_003534997.1|/5.81324e-07/PREDICTED: uncharacterized protein LOC100500487 [Glycine max]
Pbr022860.1	918	104	25	21.4402	5.41722	-1.9847	Down	5.2821e-12	5.39047e-11	-	GO:0031224//intrinsic to membrane	-	-	gi|224094686|ref|XP_002310199.1|/1.84341e-106/predicted protein [Populus trichocarpa]
Pbr020023.1	1032	673	162	123.417	31.2259	-1.98273	Down	1.74585e-69	7.95952e-68	-	GO:0016020//membrane	-	-	gi|357466061|ref|XP_003603315.1|/7.86767e-96/hypothetical protein MTR_3g106250 [Medicago truncatula]
Pbr000067.1	738	54	13	13.8477	3.50402	-1.98256	Down	7.76926e-07	4.93076e-06	K12462|1|2e-96|349|rcu:RCOM_0669590|Rho GDP-dissociation inhibitor	GO:0044424//intracellular part	GO:0005488//binding;GO:0005092//GDP-dissociation inhibitor activity	GO:0009826//unidimensional cell growth;GO:0009913//epidermal cell differentiation	gi|255559076|ref|XP_002520560.1|/2.27348e-95/Rho GDP-dissociation inhibitor, putative [Ricinus communis]
Pbr020709.1	846	108	26	24.1598	6.11339	-1.98256	Down	2.13032e-12	2.25056e-11	K09872|1|4e-142|501|ath:AT4G35100|aquaporin PIP	GO:0031224//intrinsic to membrane	-	GO:0006810//transport	gi|397768768|gb|AFO63679.1|/1.07055e-150/plasma intrinsic protein 2 [Eriobotrya japonica]
Pbr002475.1	2976	627	151	39.8725	10.0931	-1.98203	Down	7.98424e-65	3.40159e-63	K13420|1|2e-76|286|pop:POPTR_1075175|LRR receptor-like serine/threonine-protein kinase FLS2 [EC:2.7.11.1]	-	-	-	gi|359488583|ref|XP_003633782.1|/0/PREDICTED: LRR receptor-like serine/threonine-protein kinase FLS2-like [Vitis vinifera]
Pbr012103.1	1089	394	95	68.4711	17.353	-1.98031	Down	2.6111e-41	7.5858e-40	K13464|1|2e-84|310|vvi:100262965|jasmonate ZIM domain-containing protein	-	-	-	gi|363807012|ref|NP_001242320.1|/8.79168e-85/uncharacterized protein LOC100787821 [Glycine max]
Pbr008413.1	501	1802	435	680.701	172.715	-1.97862	Down	1.71902e-182	2.03224e-180	-	-	-	-	gi|224106736|ref|XP_002314267.1|/9.29866e-46/predicted protein [Populus trichocarpa]
Pbr010898.1	2100	124	30	11.1748	2.84172	-1.97542	Down	5.6678e-14	6.61461e-13	K14318|1|4e-88|316|vvi:100265724|nuclear pore complex protein Nup88	GO:0005635//nuclear envelope	GO:0005488//binding	GO:0009267//cellular response to starvation;GO:0006605//protein targeting;GO:0009814//defense response, incompatible interaction	gi|225448406|ref|XP_002271517.1|/4.5872e-87/PREDICTED: uncharacterized protein LOC100265724 [Vitis vinifera]
Pbr022435.1	1494	967	234	122.494	31.1562	-1.97512	Down	1.42667e-98	9.38816e-97	-	-	-	-	gi|224057176|ref|XP_002299157.1|/5.03446e-148/predicted protein [Populus trichocarpa]
Pbr025777.1	1152	723	175	118.775	30.2179	-1.97475	Down	3.9325e-74	1.92116e-72	K01090|1|7e-22|103|sbi:SORBI_01g038410|protein phosphatase [EC:3.1.3.16];K14497|2|8e-18|89.7|aly:ARALYDRAFT_492207|protein phosphatase 2C [EC:3.1.3.16]	GO:0043234//protein complex;GO:0043231//intracellular membrane-bounded organelle	GO:0043169//cation binding;GO:0004721//phosphoprotein phosphatase activity	GO:0006464//cellular protein modification process	gi|224060690|ref|XP_002300254.1|/1.06708e-168/predicted protein [Populus trichocarpa]
Pbr000205.4	2040	355	86	32.9335	8.38586	-1.97352	Down	3.21746e-37	8.50587e-36	K04733|1|4e-64|244|smo:SELMODRAFT_159261|interleukin-1 receptor-associated kinase 4 [EC:2.7.11.1];K13430|4|4e-60|231|zma:100283091|serine/threonine-protein kinase PBS1 [EC:2.7.11.1]	-	-	-	gi|356575763|ref|XP_003556006.1|/0/PREDICTED: cysteine-rich receptor-like protein kinase 29-like isoform 1 [Glycine max]
Pbr010632.1	963	33	8	6.48525	1.65251	-1.97251	Down	0.000131535	0.000604015	K00430|1|9e-147|517|pop:POPTR_560610|peroxidase [EC:1.11.1.7]	GO:0031410//cytoplasmic vesicle	GO:0016209//antioxidant activity;GO:0005506//iron ion binding;GO:0003824//catalytic activity	GO:0006950//response to stress;GO:0008152//metabolic process	gi|224087140|ref|XP_002308082.1|/9.78452e-146/predicted protein [Populus trichocarpa]
Pbr027848.1	1230	358	87	55.0829	14.07	-1.96898	Down	2.06674e-37	5.49033e-36	-	-	-	-	gi|359475821|ref|XP_002285150.2|/9.04664e-121/PREDICTED: uncharacterized protein LOC100266444 [Vitis vinifera]
Pbr021778.1	2331	74	18	6.00798	1.53607	-1.96764	Down	7.81714e-09	6.18419e-08	K15277|1|2e-162|571|rcu:RCOM_1613660|solute carrier family 35 (adenosine 3'-phospho 5'-phosphosulfate transporter), member B3	GO:0031224//intrinsic to membrane	-	GO:0006810//transport	gi|255541442|ref|XP_002511785.1|/1.79072e-161/Adenosine 3'-phospho 5'-phosphosulfate transporter, putative [Ricinus communis]
Pbr035318.1	741	37	9	9.4498	2.41604	-1.96764	Down	5.12646e-05	0.00025385	K04733|1|2e-37|153|aly:ARALYDRAFT_916421|interleukin-1 receptor-associated kinase 4 [EC:2.7.11.1];K05658|3|7e-26|115|vvi:100262734|ATP-binding cassette, subfamily B (MDR/TAP), member 1;K00924|4|5e-25|112|aly:ARALYDRAFT_491086|[EC:2.7.1.-]	-	GO:0016301//kinase activity	-	gi|339431366|gb|AEJ72559.1|/1.95797e-62/putative serine/threonine kinase [Malus x domestica]
Pbr035517.2	1356	78	19	10.8861	2.78723	-1.96559	Down	3.13006e-09	2.57002e-08	K06685|1|3e-27|121|ath:AT4G19050|maintenance of ploidy protein MOB1 (MPS1 binder 1)	-	-	-	gi|296089409|emb|CBI39228.3|/9.11557e-85/unnamed protein product [Vitis vinifera]
Pbr022742.1	336	41	10	23.0932	5.92025	-1.96374	Down	2.00784e-05	0.000105446	-	-	-	-	gi|388491406|gb|AFK33769.1|/1.93304e-18/unknown [Lotus japonicus]
Pbr028664.1	609	41	10	12.7411	3.26635	-1.96374	Down	2.00784e-05	0.000105467	K07874|1|4e-91|331|osa:4325347|Ras-related protein Rab-1A	GO:0016020//membrane;GO:0031410//cytoplasmic vesicle	GO:0032561//guanyl ribonucleotide binding;GO:0003824//catalytic activity	GO:0035556//intracellular signal transduction;GO:0006810//transport	gi|388506692|gb|AFK41412.1|/6.08035e-92/unknown [Medicago truncatula]
Pbr013564.1	1203	45	11	7.07923	1.81889	-1.96053	Down	7.89578e-06	4.38978e-05	-	-	GO:0003824//catalytic activity	-	gi|225455348|ref|XP_002276809.1|/7.33024e-160/PREDICTED: putative aminoacrylate hydrolase RutD [Vitis vinifera]
Pbr027740.1	2697	94	23	6.59608	1.69639	-1.95914	Down	8.1324e-11	7.61096e-10	K06685|1|2e-30|133|pop:POPTR_554110|maintenance of ploidy protein MOB1 (MPS1 binder 1)	-	-	-	gi|302398837|gb|ADL36713.1|/1.8304e-88/HD domain class transcription factor [Malus x domestica]
Pbr017321.1	939	49	12	9.87574	2.54211	-1.95786	Down	3.1156e-06	1.83608e-05	-	GO:0043231//intracellular membrane-bounded organelle	-	-	gi|356569426|ref|XP_003552902.1|/3.16942e-93/PREDICTED: uncharacterized protein LOC100784357 [Glycine max]
Pbr016619.1	1194	102	25	16.1672	4.165	-1.95668	Down	1.31773e-11	1.30763e-10	K04733|1|1e-99|361|ath:AT5G38990|interleukin-1 receptor-associated kinase 4 [EC:2.7.11.1];K13430|5|8e-45|179|pop:POPTR_413452|serine/threonine-protein kinase PBS1 [EC:2.7.11.1]	GO:0016020//membrane;GO:0044426	GO:0004672//protein kinase activity	GO:0006952//defense response;GO:0007275//multicellular organismal development;GO:0006468//protein phosphorylation;GO:0009856//pollination	gi|359488520|ref|XP_003633771.1|/2.43608e-123/PREDICTED: receptor-like protein kinase FERONIA-like [Vitis vinifera]
Pbr040101.1	1026	102	25	18.8145	4.84699	-1.95668	Down	1.31773e-11	1.30716e-10	K13415|1|6e-27|119|sbi:SORBI_03g012040|protein brassinosteroid insensitive 1 [EC:2.7.10.1 2.7.11.1]	GO:0016020//membrane	GO:0016301//kinase activity	-	gi|297734326|emb|CBI15573.3|/2.21753e-58/unnamed protein product [Vitis vinifera]
Pbr000027.1	810	110	27	25.7008	6.63068	-1.95458	Down	2.1412e-12	2.26118e-11	-	-	-	-	gi|356532760|ref|XP_003534939.1|/4.62038e-55/PREDICTED: uncharacterized protein LOC100807490 isoform 2 [Glycine max]
Pbr038596.1	258	61	15	44.7455	11.5651	-1.95196	Down	1.94475e-07	1.33039e-06	-	-	-	GO:0006950//response to stress	gi|257219566|gb|ACV50436.1|/5.33562e-13/Avr9/Cf-9 rapidly elicited protein [Jatropha curcas]
Pbr013910.1	324	386	95	225.466	58.3254	-1.95071	Down	9.7217e-40	2.72018e-38	-	-	-	GO:0009056//catabolic process	gi|356561718|ref|XP_003549126.1|/1.44222e-34/PREDICTED: uncharacterized protein LOC100789966 [Glycine max]
Pbr037418.1	837	325	80	73.4847	19.0127	-1.95048	Down	1.04754e-33	2.54967e-32	K13464|1|9e-65|244|vvi:100254231|jasmonate ZIM domain-containing protein	-	GO:0005488//binding	GO:0006952//defense response;GO:0009719;GO:0009791//post-embryonic development;GO:0007165//signal transduction;GO:0048229//gametophyte development	gi|316986184|gb|ADU76348.1|/9.92384e-117/jasmonate-zim-domain protein 1 [Prunus persica]
Pbr020070.1	1023	130	32	24.0495	6.22234	-1.95048	Down	2.3018e-14	2.75701e-13	K13648|1|1e-22|105|pop:POPTR_581394|alpha-1,4-galacturonosyltransferase [EC:2.4.1.43]	GO:0043231//intracellular membrane-bounded organelle	GO:0008194//UDP-glycosyltransferase activity	GO:0010413//glucuronoxylan metabolic process;GO:0048827//phyllome development;GO:0003002//regionalization;GO:0000003//reproduction;GO:0042545//cell wall modification	gi|255538542|ref|XP_002510336.1|/8.42238e-159/transferase, transferring glycosyl groups, putative [Ricinus communis]
Pbr027175.2	3555	170	42	9.05	2.35011	-1.94519	Down	2.7428e-18	4.02705e-17	K06685|1|1e-16|87.4|ath:AT4G19050|maintenance of ploidy protein MOB1 (MPS1 binder 1)	-	-	-	gi|224127726|ref|XP_002329162.1|/1.11653e-88/tir-nbs-lrr resistance protein [Populus trichocarpa]
Pbr000013.1	1035	767	190	140.247	36.5168	-1.94134	Down	8.06042e-77	4.09149e-75	K00787|1|4e-171|598|pop:POPTR_560081|farnesyl diphosphate synthase [EC:2.5.1.1 2.5.1.10]	GO:0044424//intracellular part	GO:0043169//cation binding;GO:0004659//prenyltransferase activity	GO:0006694//steroid biosynthetic process;GO:0006720//isoprenoid metabolic process;GO:0008203//cholesterol metabolic process	gi|20135548|gb|AAM08927.1|/0/farnesyl pyrophosphate synthase [Malus x domestica]
Pbr009182.1	1494	278	69	35.2155	9.18709	-1.93853	Down	7.78962e-29	1.66453e-27	K13417|1|5e-47|187|ath:AT2G13790|somatic embryogenesis receptor kinase 4 [EC:2.7.10.1 2.7.11.1];K13416|3|6e-46|183|ath:AT4G33430|brassinosteroid insensitive 1-associated receptor kinase 1 [EC:2.7.10.1 2.7.11.1];K13418|5|4e-45|181|rcu:RCOM_0186340|somatic embryogenesis receptor kinase 1 [EC:2.7.10.1 2.7.11.1]	-	GO:0004672//protein kinase activity;GO:0000166//nucleotide binding	-	gi|224107735|ref|XP_002333472.1|/2.24941e-164/predicted protein [Populus trichocarpa]
Pbr018494.1	516	402	100	147.44	38.5505	-1.93531	Down	6.65714e-41	1.91974e-39	K14488|1|2e-49|192|rcu:RCOM_1611000|SAUR family protein	-	-	-	gi|255541222|ref|XP_002511675.1|/1.64182e-48/Auxin-induced protein X10A, putative [Ricinus communis]
Pbr005730.1	1314	229	57	32.9822	8.62897	-1.93443	Down	5.8628e-24	1.07167e-22	K14190|1|0.0|699|rcu:RCOM_0278070|GDP-L-galactose phosphorylase [EC:2.7.7.69]	-	-	-	gi|225380880|gb|ACN88681.1|/0/VTC2-like protein [Malus x domestica]
Pbr038501.1	1185	261	65	41.6832	10.9112	-1.93365	Down	4.42746e-27	9.05011e-26	-	GO:0016020//membrane	-	-	gi|255581601|ref|XP_002531605.1|/2.83933e-132/dopamine beta-monooxygenase, putative [Ricinus communis]
Pbr010773.1	2442	578	144	44.7941	11.73	-1.93311	Down	5.34722e-58	2.08016e-56	-	-	GO:0005488//binding	-	gi|359472571|ref|XP_002281609.2|/0/PREDICTED: protein OBERON 3-like [Vitis vinifera]
Pbr014779.1	558	1689	422	572.842	150.438	-1.92897	Down	1.48822e-165	1.60007e-163	-	-	-	-	gi|255551571|ref|XP_002516831.1|/2.51572e-27/conserved hypothetical protein [Ricinus communis]
Pbr015502.1	834	60	15	13.6152	3.57771	-1.92811	Down	3.0711e-07	2.04309e-06	K09286|1|1e-69|261|vvi:100252531|EREBP-like factor	-	-	GO:0006351//transcription, DNA-dependent;GO:0016049//cell growth	gi|292668955|gb|ADE41132.1|/4.72903e-119/AP2 domain class transcription factor [Malus x domestica]
Pbr024724.1	1806	160	40	16.7665	4.40577	-1.92811	Down	4.10392e-17	5.69771e-16	-	-	-	-	gi|255556649|ref|XP_002519358.1|/1.43182e-22/leucine-rich repeat-containing protein, putative [Ricinus communis]
Pbr029672.1	2730	56	14	3.88208	1.0201	-1.92811	Down	7.7301e-07	4.90705e-06	K08286|1|1e-128|459|aly:ARALYDRAFT_491919|protein-serine/threonine kinase [EC:2.7.11.-];K00924|3|4e-122|437|aly:ARALYDRAFT_473063|[EC:2.7.1.-];K13415|5|3e-117|421|sbi:SORBI_03g012040|protein brassinosteroid insensitive 1 [EC:2.7.10.1 2.7.11.1]	GO:0044464//cell part	GO:0004672//protein kinase activity	-	gi|359484862|ref|XP_002274094.2|/0/PREDICTED: probable LRR receptor-like serine/threonine-protein kinase At4g08850-like [Vitis vinifera]
Pbr019762.2	1146	128	32	21.138	5.5545	-1.92811	Down	5.6817e-14	6.628e-13	K14548|1|5e-54|209|aly:ARALYDRAFT_313471|U3 small nucleolar RNA-associated protein 4	-	-	-	gi|255538038|ref|XP_002510084.1|/1.27419e-105/conserved hypothetical protein [Ricinus communis]
Pbr024648.1	2478	48	12	3.66589	0.963295	-1.92811	Down	4.9328e-06	2.82292e-05	K03013|1|3e-99|361|vvi:100258335|DNA-directed RNA polymerases I, II, and III subunit RPABC1;K13457|3|8e-54|210|rcu:RCOM_0742270|disease resistance protein RPM1	-	-	-	gi|359491491|ref|XP_003634282.1|/1.47185e-169/PREDICTED: disease resistance protein RGA2-like [Vitis vinifera]
Pbr010810.1	447	32	8	13.5482	3.5601	-1.92811	Down	0.00020952	0.000926004	K06689|1|1e-85|312|pop:POPTR_586577|ubiquitin-conjugating enzyme E2 D/E [EC:6.3.2.19]	-	GO:0019787//small conjugating protein ligase activity;GO:0032559	GO:0032446//protein modification by small protein conjugation	gi|192910722|gb|ACF06469.1|/9.33957e-85/ubiquitin conjugating enzyme [Elaeis guineensis]
Pbr020556.1	246	116	29	89.2405	23.45	-1.92811	Down	8.61984e-13	9.33383e-12	K00021|1|9e-35|142|pop:POPTR_595031|hydroxymethylglutaryl-CoA reductase (NADPH) [EC:1.1.1.34]	GO:0031224//intrinsic to membrane;GO:0009526//plastid envelope;GO:0031090//organelle membrane;GO:0005740//mitochondrial envelope	GO:0016616//oxidoreductase activity, acting on the CH-OH group of donors, NAD or NADP as acceptor;GO:0000166//nucleotide binding;GO:0048037//cofactor binding	GO:0006732//coenzyme metabolic process;GO:0006720//isoprenoid metabolic process	gi|190610724|gb|ACE80213.1|/1.19575e-36/3-hydroxy-3-methylglutaryl coenzyme A reductase 1 [Pyrus pyrifolia]
Pbr012438.2	1821	52	13	5.40421	1.42008	-1.92811	Down	1.95015e-06	1.18217e-05	-	-	GO:0005548//phospholipid transporter activity	GO:0009791//post-embryonic development	gi|363806850|ref|NP_001242548.1|/0/uncharacterized protein LOC100798374 [Glycine max]
Pbr039143.1	1005	575	144	108.278	28.502	-1.92561	Down	2.04232e-57	7.9224e-56	K09338|1|5e-36|149|aly:ARALYDRAFT_477377|homeobox-leucine zipper protein	-	GO:0003677//DNA binding	GO:0006351//transcription, DNA-dependent	gi|15148918|gb|AAK84886.1|AF402605_1/5.79104e-88/homeodomain leucine zipper protein HDZ2 [Phaseolus vulgaris]
Pbr019278.1	1536	537	135	66.1641	17.4832	-1.92008	Down	1.55643e-53	5.71297e-52	-	-	-	-	gi|225452849|ref|XP_002283706.1|/1.15593e-171/PREDICTED: dof zinc finger protein DOF5.2-like [Vitis vinifera]
Pbr027308.1	2436	139	35	10.7988	2.85805	-1.91777	Down	5.8934e-15	7.31891e-14	K04733|1|3e-57|222|smo:SELMODRAFT_33807|interleukin-1 receptor-associated kinase 4 [EC:2.7.11.1];K13430|2|3e-57|222|zma:100283091|serine/threonine-protein kinase PBS1 [EC:2.7.11.1]	-	GO:0005488//binding;GO:0004672//protein kinase activity	-	gi|359493711|ref|XP_002281022.2|/0/PREDICTED: G-type lectin S-receptor-like serine/threonine-protein kinase At4g27290-like [Vitis vinifera]
Pbr019724.1	1032	103	26	18.8885	5.01156	-1.91417	Down	2.06232e-11	2.02153e-10	-	GO:0043231//intracellular membrane-bounded organelle	-	-	gi|302142224|emb|CBI19427.3|/5.08786e-103/unnamed protein product [Vitis vinifera]
Pbr026259.1	1482	404	102	51.5908	13.6909	-1.9139	Down	1.61819e-40	4.61767e-39	-	GO:0016020//membrane	-	-	gi|255552782|ref|XP_002517434.1|/6.71513e-153/conserved hypothetical protein [Ricinus communis]
Pbr006682.1	1245	99	25	15.0489	3.99439	-1.91361	Down	5.1218e-11	4.87526e-10	-	GO:0044464//cell part	-	-	gi|356571042|ref|XP_003553690.1|/0/PREDICTED: uncharacterized protein LOC100788448 [Glycine max]
Pbr026657.1	2739	186	47	12.8517	3.41338	-1.91268	Down	1.82199e-19	2.79847e-18	K08286|1|2e-101|369|ath:AT4G28490|protein-serine/threonine kinase [EC:2.7.11.-]	GO:0044464//cell part	GO:0016301//kinase activity	-	gi|224132304|ref|XP_002321306.1|/0/predicted protein [Populus trichocarpa]
Pbr019855.1	267	150	38	106.321	28.3108	-1.909	Down	6.12308e-16	8.01991e-15	K03676|1|1e-09|59.7|bdi:100821530|glutaredoxin 3	-	GO:0015036//disulfide oxidoreductase activity	GO:0019725//cellular homeostasis	gi|329750627|gb|AEC03329.1|/1.216e-28/glutaredoxin 2 [Hevea brasiliensis]
Pbr004197.1	1320	134	34	19.2119	5.12371	-1.90674	Down	2.27942e-14	2.7314e-13	-	GO:0043231//intracellular membrane-bounded organelle	GO:0005099//Ras GTPase activator activity	GO:0032318//regulation of Ras GTPase activity	gi|356543936|ref|XP_003540414.1|/0/PREDICTED: TBC1 domain family member 15-like [Glycine max]
Pbr020961.1	1665	118	30	13.4124	3.58415	-1.90386	Down	8.54322e-13	9.25821e-12	K01099|1|8e-57|219|ota:Ot04g02290|phosphatidylinositol-bisphosphatase [EC:3.1.3.36]	-	GO:0016788//hydrolase activity, acting on ester bonds	-	gi|359481506|ref|XP_002274849.2|/4.38879e-172/PREDICTED: type I inositol-1,4,5-trisphosphate 5-phosphatase CVP2-like [Vitis vinifera]
Pbr013951.1	522	59	15	21.3905	5.7161	-1.90386	Down	4.83522e-07	3.14393e-06	-	GO:0044424//intracellular part	-	-	gi|41351515|dbj|BAD08339.1|/8.64739e-77/flowering locus T like protein [Populus nigra]
Pbr042825.1	507	963	245	359.466	96.1253	-1.90287	Down	1.65889e-93	1.0296e-91	K13448|1|7e-45|177|ath:AT1G18210|calcium-binding protein CML	GO:0016020//membrane;GO:0043231//intracellular membrane-bounded organelle	GO:0046872//metal ion binding	-	gi|14589311|emb|CAC43238.1|/8.43384e-50/calcium binding protein [Sesbania rostrata]
Pbr023465.1	1899	601	153	59.8947	16.0268	-1.90195	Down	5.58066e-59	2.18969e-57	K07195|1|0.0|636|vvi:100267121|exocyst complex component 7	GO:0044444//cytoplasmic part;GO:0043231//intracellular membrane-bounded organelle	-	GO:0006887//exocytosis	gi|255588826|ref|XP_002534730.1|/0/protein binding protein, putative [Ricinus communis]
Pbr039282.1	1008	153	39	28.7257	7.69633	-1.9001	Down	3.87692e-16	5.12463e-15	-	-	-	GO:0009743//response to carbohydrate stimulus	gi|289466351|gb|ADC94861.1|/3.19271e-86/HSP transcription factor [Vitis pseudoreticulata]
Pbr028239.1	1983	98	25	9.35282	2.50782	-1.89897	Down	8.02262e-11	7.51594e-10	K04733|1|1e-52|206|smo:SELMODRAFT_159261|interleukin-1 receptor-associated kinase 4 [EC:2.7.11.1];K13417|3|1e-51|203|ath:AT2G13790|somatic embryogenesis receptor kinase 4 [EC:2.7.10.1 2.7.11.1];K13418|4|1e-51|202|ath:AT1G71830|somatic embryogenesis receptor kinase 1 [EC:2.7.10.1 2.7.11.1]	GO:0016020//membrane	GO:0004672//protein kinase activity;GO:0000166//nucleotide binding	GO:0032501//multicellular organismal process;GO:0009755//hormone-mediated signaling pathway	gi|332083027|gb|AEE00746.1|/0/lectin receptor-like kinase [Gossypium hirsutum]
Pbr032991.1	1362	2387	610	331.676	89.0906	-1.89643	Down	6.08836e-228	9.61081e-226	K07513|1|2e-179|626|pop:POPTR_816771|acetyl-CoA acyltransferase 1 [EC:2.3.1.16]	GO:0031981//nuclear lumen;GO:0009536//plastid;GO:0042579//microbody;GO:0031090//organelle membrane	GO:0016408	GO:0009694//jasmonic acid metabolic process;GO:0009062//fatty acid catabolic process;GO:0009657//plastid organization;GO:0009738//abscisic acid mediated signaling pathway;GO:0006950//response to stress	gi|224064818|ref|XP_002301570.1|/2.42913e-178/predicted protein [Populus trichocarpa]
Pbr024523.1	465	360	92	146.517	39.3563	-1.8964	Down	7.41328e-36	1.89382e-34	K13448|1|3e-43|172|pop:POPTR_711309|calcium-binding protein CML	GO:0043231//intracellular membrane-bounded organelle;GO:0016020//membrane	GO:0046872//metal ion binding;GO:0016491//oxidoreductase activity	GO:0046209//nitric oxide metabolic process;GO:0009908//flower development	gi|356539832|ref|XP_003538397.1|/5.66456e-46/PREDICTED: probable calcium-binding protein CML27-like isoform 1 [Glycine max]
Pbr039057.1	993	90	23	17.1527	4.60742	-1.8964	Down	4.9612e-10	4.36065e-09	-	-	-	-	gi|357443267|ref|XP_003591911.1|/2.19811e-140/Monoglyceride lipase [Medicago truncatula]
Pbr019790.1	2100	446	114	40.1934	10.7985	-1.89612	Down	5.01472e-44	1.56332e-42	K13680|1|2e-115|414|smo:SELMODRAFT_230176|beta-mannan synthase [EC:2.4.1.32]	-	GO:0016759//cellulose synthase activity	-	gi|224067154|ref|XP_002302382.1|/0/predicted protein [Populus trichocarpa]
Pbr025203.1	546	43	11	14.9044	4.00755	-1.89495	Down	1.97593e-05	0.00010391	K11086|1|6e-08|55.1|vcn:VOLCADRAFT_107252|small nuclear ribonucleoprotein B and B'	-	GO:0005488//binding	GO:0009987//cellular process	gi|224086357|ref|XP_002307862.1|/4.82618e-44/predicted protein [Populus trichocarpa]
Pbr033314.1	708	125	32	33.413	8.99075	-1.8939	Down	2.17888e-13	2.46185e-12	K06966|1|5e-95|345|pop:POPTR_713418|	GO:0044444//cytoplasmic part;GO:0043231//intracellular membrane-bounded organelle	GO:0003824//catalytic activity	-	gi|147866206|emb|CAN79419.1|/1.40068e-99/hypothetical protein VITISV_025067 [Vitis vinifera]
Pbr037395.1	2514	82	21	6.17288	1.66163	-1.89335	Down	3.07922e-09	2.53132e-08	K00695|1|0.0|1305|gmx:547508|sucrose synthase [EC:2.4.1.13]	-	GO:0035251//UDP-glucosyltransferase activity	GO:0005984//disaccharide metabolic process;GO:0044403//symbiosis, encompassing mutualism through parasitism	gi|385282642|gb|AFI57908.1|/0/sucrose synthase 1 [Prunus persica]
Pbr034219.1	3207	39	10	2.30147	0.620269	-1.89159	Down	5.03644e-05	0.000249619	K10999|1|0.0|1806|gmx:100815436|cellulose synthase A [EC:2.4.1.12]	GO:0031224//intrinsic to membrane	GO:0016759//cellulose synthase activity;GO:0046914//transition metal ion binding	GO:0045229//external encapsulating structure organization;GO:0009250//glucan biosynthetic process	gi|340343835|gb|AEK31217.1|/0/cellulose synthase A [Eucalyptus camaldulensis]
Pbr028654.2	1101	39	10	6.70373	1.80672	-1.89159	Down	5.03644e-05	0.000249664	K14819|1|2e-143|506|pop:POPTR_576161|dual specificity phosphatase 12 [EC:3.1.3.16 3.1.3.48];K14165|5|3e-103|373|osa:4351431|dual specificity phosphatase [EC:3.1.3.16 3.1.3.48]	-	GO:0004721//phosphoprotein phosphatase activity	GO:0006796//phosphate-containing compound metabolic process	gi|224137682|ref|XP_002322618.1|/2.09347e-142/predicted protein [Populus trichocarpa]
Pbr024370.1	369	3588	922	1840.2	497.032	-1.88845	Down	0	0	-	GO:0009534//chloroplast thylakoid	-	GO:0006950//response to stress;GO:0009642//response to light intensity;GO:0009767//photosynthetic electron transport chain	gi|255574925|ref|XP_002528369.1|/7.7549e-44/conserved hypothetical protein [Ricinus communis]
Pbr016511.2	777	35	9	8.52484	2.3041	-1.88747	Down	0.000128955	0.000593165	K08235|1|5e-133|471|rcu:RCOM_1307350|xyloglucan:xyloglucosyl transferase [EC:2.4.1.207]	GO:0005576//extracellular region;GO:0030312//external encapsulating structure	GO:0016798//hydrolase activity, acting on glycosyl bonds;GO:0016758//transferase activity, transferring hexosyl groups	GO:0044042//glucan metabolic process	gi|351726490|ref|NP_001238152.1|/2.29428e-133/brassinosteroid-regulated protein BRU1 precursor [Glycine max]
Pbr004775.2	1827	35	9	3.62551	0.979904	-1.88747	Down	0.000128955	0.000593065	-	-	-	-	gi|255569048|ref|XP_002525493.1|/2.96896e-68/leucine-rich repeat-containing protein, putative [Ricinus communis]
Pbr037321.1	3138	350	90	21.1083	5.70517	-1.88747	Down	1.07715e-34	2.68149e-33	K08518|1|9e-90|330|smo:SELMODRAFT_449132|syntaxin-binding protein 5	-	-	-	gi|225431423|ref|XP_002280019.1|/0/PREDICTED: uncharacterized protein LOC100262676 [Vitis vinifera]
Pbr007372.2	351	651	168	351.005	95.2098	-1.88231	Down	6.96836e-63	2.88332e-61	-	-	-	-	-
Pbr008342.1	774	182	47	44.501	12.0791	-1.88132	Down	1.07866e-18	1.61321e-17	K09872|1|2e-109|393|pop:POPTR_735495|aquaporin PIP	GO:0016020//membrane	-	GO:0006810//transport	gi|224138690|ref|XP_002322877.1|/1.94162e-108/aquaporin, MIP family, PIP subfamily [Populus trichocarpa]
Pbr009838.5	2964	429	111	27.3916	7.44945	-1.87853	Down	6.67028e-42	1.96928e-40	K06685|1|3e-13|76.3|aly:ARALYDRAFT_492950|maintenance of ploidy protein MOB1 (MPS1 binder 1)	-	-	-	gi|399920201|gb|AFP55548.1|/0/TIR-NBS-LRR [Rosa rugosa]
Pbr010911.1	3615	448	116	23.4536	6.38306	-1.87749	Down	1.18178e-43	3.65081e-42	K13428|1|0.0|769|aly:ARALYDRAFT_488953|LRR receptor-like serine/threonine-protein kinase EFR [EC:2.7.11.1];K13420|3|4e-140|498|vvi:100253808|LRR receptor-like serine/threonine-protein kinase FLS2 [EC:2.7.11.1]	-	GO:0016301//kinase activity	-	gi|255577438|ref|XP_002529598.1|/0/receptor-kinase, putative [Ricinus communis]
Pbr034311.1	1077	324	84	56.9336	15.5147	-1.87565	Down	5.62478e-32	1.31288e-30	-	GO:0043231//intracellular membrane-bounded organelle	GO:0003677//DNA binding;GO:0001071//nucleic acid binding transcription factor activity	GO:0006351//transcription, DNA-dependent	gi|302398851|gb|ADL36720.1|/2.89604e-173/HD domain class transcription factor [Malus x domestica]
Pbr008712.2	2331	81	21	6.5763	1.79208	-1.87565	Down	4.815e-09	3.87999e-08	-	-	-	-	gi|225465331|ref|XP_002274914.1|/6.08474e-28/PREDICTED: uncharacterized protein LOC100255669 [Vitis vinifera]
Pbr007129.1	492	54	14	20.7715	5.66034	-1.87565	Down	1.91199e-06	1.16058e-05	-	-	-	-	gi|255541838|ref|XP_002511983.1|/5.89781e-34/conserved hypothetical protein [Ricinus communis]
Pbr018962.1	3717	77	20	3.92046	1.07033	-1.87297	Down	1.20156e-08	9.32199e-08	K13428|1|0.0|783|ath:AT5G20480|LRR receptor-like serine/threonine-protein kinase EFR [EC:2.7.11.1];K13420|5|2e-142|505|vvi:100253808|LRR receptor-like serine/threonine-protein kinase FLS2 [EC:2.7.11.1]	-	GO:0004672//protein kinase activity	-	gi|359486510|ref|XP_002271317.2|/0/PREDICTED: probable LRR receptor-like serine/threonine-protein kinase At3g47570-like, partial [Vitis vinifera]
Pbr026767.2	303	50	13	31.2296	8.53454	-1.87153	Down	4.82856e-06	2.76907e-05	K02183|1|1e-07|52.8|cme:CMK219C|calmodulin;K13448|2|1e-06|49.7|pop:POPTR_657221|calcium-binding protein CML	GO:0044444//cytoplasmic part	GO:0046872//metal ion binding;GO:0070011	GO:0009725//response to hormone stimulus;GO:0019538//protein metabolic process;GO:0006972//hyperosmotic response;GO:0009639//response to red or far red light	gi|224101537|ref|XP_002312322.1|/1.13376e-26/predicted protein [Populus trichocarpa]
Pbr004941.1	258	96	25	70.4191	19.2752	-1.86922	Down	1.95686e-10	1.78252e-09	-	-	GO:0003676//nucleic acid binding;GO:0046914//transition metal ion binding	-	gi|224106053|ref|XP_002314027.1|/6.01151e-18/predicted protein [Populus trichocarpa]
Pbr036705.1	2757	92	24	6.31524	1.73162	-1.86671	Down	4.86434e-10	4.27827e-09	K04733|1|4e-68|258|smo:SELMODRAFT_159261|interleukin-1 receptor-associated kinase 4 [EC:2.7.11.1];K13430|2|5e-67|254|sbi:SORBI_04g020990|serine/threonine-protein kinase PBS1 [EC:2.7.11.1]	GO:0016020//membrane	GO:0016491//oxidoreductase activity;GO:0004672//protein kinase activity;GO:0032559	GO:0006464//cellular protein modification process	gi|359493983|ref|XP_002283596.2|/0/PREDICTED: probable leucine-rich repeat receptor-like serine/threonine-protein kinase At3g14840-like [Vitis vinifera]
Pbr037402.1	648	444	116	129.672	35.6092	-1.86455	Down	6.8382e-43	2.07725e-41	K03564|1|3e-93|338|vvi:100250698|peroxiredoxin Q/BCP [EC:1.11.1.15]	GO:0031976	GO:0016209//antioxidant activity;GO:0016705//oxidoreductase activity, acting on paired donors, with incorporation or reduction of molecular oxygen	GO:0008152//metabolic process;GO:0019725//cellular homeostasis	gi|75127599|sp|Q6QPJ6.1|PRXQ_POPJC/4.78577e-93/RecName: Full=Peroxiredoxin Q, chloroplastic; AltName: Full=Thioredoxin reductase; Flags: Precursor
Pbr018190.1	1329	352	92	50.1253	13.7703	-1.86398	Down	2.51566e-34	6.21159e-33	-	GO:0005887//integral to plasma membrane	GO:0005267//potassium channel activity	GO:0030001//metal ion transport	gi|359474193|ref|XP_003631414.1|/1.68227e-176/PREDICTED: BTB/POZ domain-containing protein At5g41330-like [Vitis vinifera]
Pbr038858.1	420	130	34	58.5778	16.1031	-1.86302	Down	1.34769e-13	1.54056e-12	K13448|1|1e-34|142|ath:AT1G18210|calcium-binding protein CML	GO:0016020//membrane;GO:0043231//intracellular membrane-bounded organelle	GO:0046872//metal ion binding	-	gi|14589311|emb|CAC43238.1|/6.81197e-40/calcium binding protein [Sesbania rostrata]
Pbr028797.1	2250	42	11	3.53269	0.9725	-1.861	Down	3.10678e-05	0.000159001	K13416|1|1e-51|202|rcu:RCOM_1534760|brassinosteroid insensitive 1-associated receptor kinase 1 [EC:2.7.10.1 2.7.11.1];K13418|2|7e-51|200|rcu:RCOM_0186340|somatic embryogenesis receptor kinase 1 [EC:2.7.10.1 2.7.11.1]	-	GO:0004672//protein kinase activity;GO:0032559	GO:0006464//cellular protein modification process	gi|224108429|ref|XP_002314844.1|/8.92597e-134/predicted protein [Populus trichocarpa]
Pbr004074.1	2313	80	21	6.54566	1.80602	-1.85772	Down	7.5116e-09	5.9511e-08	K13428|1|6e-133|473|ath:AT5G20480|LRR receptor-like serine/threonine-protein kinase EFR [EC:2.7.11.1]	-	GO:0016301//kinase activity	-	gi|359486510|ref|XP_002271317.2|/6.29518e-167/PREDICTED: probable LRR receptor-like serine/threonine-protein kinase At3g47570-like, partial [Vitis vinifera]
Pbr013275.3	1239	118	31	18.0239	4.97702	-1.85656	Down	2.039e-12	2.15909e-11	K03453|1|2e-11|68.9|vcn:VOLCADRAFT_102664|bile acid:Na+ symporter, BASS family	GO:0043231//intracellular membrane-bounded organelle	-	-	gi|224108508|ref|XP_002314874.1|/2.34652e-92/predicted protein [Populus trichocarpa]
Pbr007495.1	2328	57	15	4.63373	1.2817	-1.85411	Down	1.1874e-06	7.40507e-06	K13430|1|5e-50|197|rcu:RCOM_1078760|serine/threonine-protein kinase PBS1 [EC:2.7.11.1];K04733|2|6e-50|197|aly:ARALYDRAFT_916421|interleukin-1 receptor-associated kinase 4 [EC:2.7.11.1]	-	GO:0004871//signal transducer activity;GO:0004674//protein serine/threonine kinase activity;GO:0000166//nucleotide binding	GO:0009987//cellular process	gi|359477044|ref|XP_002275760.2|/0/PREDICTED: G-type lectin S-receptor-like serine/threonine-protein kinase RLK1-like [Vitis vinifera]
Pbr016562.1	1194	702	185	111.268	30.821	-1.85206	Down	3.04582e-66	1.32661e-64	K12135|1|1e-83|308|aly:ARALYDRAFT_488429|zinc finger protein CONSTANS	-	-	-	gi|302398765|gb|ADL36677.1|/8.84233e-166/COL domain class transcription factor [Malus x domestica]
Pbr013215.1	1992	53	14	5.0353	1.39804	-1.84868	Down	2.99188e-06	1.76851e-05	K00876|1|5e-19|94.7|zma:100191860|uridine kinase [EC:2.7.1.48]	-	GO:0009975//cyclase activity;GO:0032559;GO:0019206//nucleoside kinase activity	GO:0006164//purine nucleotide biosynthetic process;GO:0009725//response to hormone stimulus;GO:0006796//phosphate-containing compound metabolic process	gi|255546967|ref|XP_002514541.1|/0/uridine cytidine kinase I, putative [Ricinus communis]
Pbr014461.1	1197	704	186	111.306	30.9099	-1.84839	Down	2.9809e-66	1.30041e-64	K15015|1|2e-15|82.0|pop:POPTR_576813|solute carrier family 32 (vesicular inhibitory amino acid transporter)	GO:0031224//intrinsic to membrane	GO:0005275//amine transmembrane transporter activity	GO:0009628//response to abiotic stimulus;GO:0006865//amino acid transport	gi|356558769|ref|XP_003547675.1|/0/PREDICTED: lysine histidine transporter 1-like [Glycine max]
Pbr027450.1	2109	1744	461	156.498	43.4814	-1.84767	Down	2.39932e-161	2.52012e-159	K05391|1|0.0|900|rcu:RCOM_1579800|cyclic nucleotide gated channel, other eukaryote	GO:0016020//membrane	GO:0005249//voltage-gated potassium channel activity;GO:0005515//protein binding;GO:0005217//intracellular ligand-gated ion channel activity;GO:0000166//nucleotide binding	GO:0070838//divalent metal ion transport	gi|255545024|ref|XP_002513573.1|/0/Cyclic nucleotide-gated ion channel, putative [Ricinus communis]
Pbr040842.1	393	34	9	16.3729	4.55543	-1.84565	Down	0.000203038	0.00089954	K00021|1|3e-34|141|pop:POPTR_595031|hydroxymethylglutaryl-CoA reductase (NADPH) [EC:1.1.1.34]	GO:0031090//organelle membrane;GO:0043231//intracellular membrane-bounded organelle;GO:0031224//intrinsic to membrane	GO:0016616//oxidoreductase activity, acting on the CH-OH group of donors, NAD or NADP as acceptor;GO:0048037//cofactor binding;GO:0000166//nucleotide binding	GO:0006720//isoprenoid metabolic process;GO:0006732//coenzyme metabolic process	gi|14572556|gb|AAK64657.1|/8.62878e-35/3-hydroxy-3-methylglutaryl coenzyme A reductase [Malus x domestica]
Pbr029942.1	789	34	9	8.15532	2.26905	-1.84565	Down	0.000203038	0.000899686	K03070|1|8e-07|52.4|aly:ARALYDRAFT_313056|preprotein translocase subunit SecA	-	GO:0046914//transition metal ion binding	-	gi|356499871|ref|XP_003518759.1|/1.35303e-96/PREDICTED: uncharacterized protein LOC100499984 [Glycine max]
Pbr012565.1	2025	34	9	3.17755	0.884091	-1.84565	Down	0.000203038	0.000899394	K08286|1|0.0|649|aly:ARALYDRAFT_905010|protein-serine/threonine kinase [EC:2.7.11.-];K08282|5|4e-81|300|ath:AT3G45780|non-specific serine/threonine protein kinase [EC:2.7.11.1]	-	GO:0004672//protein kinase activity;GO:0000166//nucleotide binding	-	gi|225452330|ref|XP_002272711.1|/0/PREDICTED: protein kinase PVPK-1-like [Vitis vinifera]
Pbr032600.1	1329	68	18	9.68329	2.69418	-1.84565	Down	1.17149e-07	8.22424e-07	K01809|1|2e-166|583|gmx:100815644|mannose-6-phosphate isomerase [EC:5.3.1.8]	-	GO:0046914//transition metal ion binding;GO:0016861//intramolecular oxidoreductase activity, interconverting aldoses and ketoses	GO:0019852//L-ascorbic acid metabolic process;GO:0003006//developmental process involved in reproduction;GO:0044238//primary metabolic process	gi|356527492|ref|XP_003532343.1|/2.27893e-165/PREDICTED: mannose-6-phosphate isomerase-like [Glycine max]
Pbr034043.1	228	68	18	56.4434	15.7042	-1.84565	Down	1.17149e-07	8.22212e-07	-	-	-	-	gi|356517608|ref|XP_003527479.1|/1.18871e-07/PREDICTED: uncharacterized protein LOC100785857 [Glycine max]
Pbr001353.1	2385	68	18	5.39585	1.50129	-1.84565	Down	1.17149e-07	8.22001e-07	K04733|1|3e-43|175|ath:AT5G38990|interleukin-1 receptor-associated kinase 4 [EC:2.7.11.1];K13429|3|3e-41|168|sbi:SORBI_02g029560|chitin elicitor receptor kinase 1;K00924|4|2e-40|166|osa:4333525|[EC:2.7.1.-]	GO:0043234//protein complex;GO:0016020//membrane;GO:0009536//plastid	GO:0004871//signal transducer activity;GO:0004672//protein kinase activity;GO:0019787//small conjugating protein ligase activity;GO:0032559	GO:0032446//protein modification by small protein conjugation	gi|297745064|emb|CBI38656.3|/0/unnamed protein product [Vitis vinifera]
Pbr004439.2	1440	49	13	6.4398	1.79581	-1.84238	Down	7.55684e-06	4.21163e-05	K11155|1|0.0|717|gmx:548005|diacylglycerol O-acyltransferase 1 [EC:2.3.1.20 2.3.1.75 2.3.1.76]	GO:0031224//intrinsic to membrane	GO:0008374//O-acyltransferase activity	-	gi|351723727|ref|NP_001237289.1|/0/diacylglycerol acyltransferase [Glycine max]
Pbr019807.1	1122	1401	372	236.311	65.9522	-1.84119	Down	2.23254e-129	1.89343e-127	K15172|1|5e-28|123|vcn:VOLCADRAFT_106802|transcription elongation factor SPT5	-	-	-	gi|302398723|gb|ADL36656.1|/0/C3HL domain class transcription factor [Malus x domestica]
Pbr034503.1	573	497	132	164.15	45.8246	-1.84082	Down	5.1079e-47	1.68672e-45	-	-	-	-	gi|224081172|ref|XP_002306320.1|/2.34319e-39/predicted protein [Populus trichocarpa]
Pbr034115.1	1566	64	17	7.73441	2.15942	-1.84065	Down	2.93498e-07	1.96065e-06	K13424|1|2e-175|613|vvi:100243352|WRKY transcription factor 33	-	-	-	gi|302399121|gb|ADL36855.1|/0/WRKY domain class transcription factor [Malus x domestica]
Pbr039067.1	1056	256	68	45.8791	12.8093	-1.84065	Down	5.50752e-25	1.033e-23	-	-	GO:0005488//binding	-	gi|255586867|ref|XP_002534043.1|/1.87105e-108/GATA transcription factor, putative [Ricinus communis]
Pbr012148.1	1326	143	38	20.4095	5.70059	-1.84006	Down	1.35459e-14	1.64193e-13	K10597|1|7e-07|53.5|ota:Ot17g01860|ubiquitin conjugation factor E4 B [EC:6.3.2.19];K09561|2|7e-07|53.5|zma:100273449|STIP1 homology and U-box containing protein 1 [EC:6.3.2.19]	-	GO:0016874//ligase activity	-	gi|359473099|ref|XP_003631249.1|/3.39464e-161/PREDICTED: U-box domain-containing protein 21-like [Vitis vinifera]
Pbr035710.1	1053	459	122	82.4942	23.0468	-1.83973	Down	1.62338e-43	5.0037e-42	K13414|1|7e-34|142|aly:ARALYDRAFT_489755|mitogen-activated protein kinase kinase kinase 1, plant [EC:2.7.11.25];K11228|3|5e-31|133|ota:Ot13g01170|mitogen-activated protein kinase kinase kinase [EC:2.7.11.1]	-	GO:0004672//protein kinase activity;GO:0000166//nucleotide binding	GO:0009987//cellular process;GO:0044238//primary metabolic process;GO:0003006//developmental process involved in reproduction	gi|255565216|ref|XP_002523600.1|/1.42964e-100/ATP binding protein, putative [Ricinus communis]
Pbr034701.1	954	1165	310	231.109	64.6387	-1.8381	Down	1.17741e-107	8.50631e-106	K15104|1|5e-118|422|vvi:100245527|solute carrier family 25 (mitochondrial oxoglutarate transporter), member 11	GO:0043231//intracellular membrane-bounded organelle;GO:0016020//membrane	-	GO:0006810//transport;GO:0009987//cellular process	gi|225459119|ref|XP_002285693.1|/5.51001e-117/PREDICTED: probable mitochondrial 2-oxoglutarate/malate carrier protein-like [Vitis vinifera]
Pbr015521.1	1176	1551	413	249.599	69.859	-1.8371	Down	1.34512e-142	1.26669e-140	K14497|1|4e-158|555|vvi:100243875|protein phosphatase 2C [EC:3.1.3.16]	GO:0043231//intracellular membrane-bounded organelle;GO:0043234//protein complex	GO:0019900//kinase binding;GO:0046872//metal ion binding;GO:0004721//phosphoprotein phosphatase activity	GO:0010118//stomatal movement;GO:0009738//abscisic acid mediated signaling pathway;GO:0006950//response to stress;GO:0006464//cellular protein modification process	gi|359484545|ref|XP_002280468.2|/4.30156e-157/PREDICTED: probable protein phosphatase 2C 6-like [Vitis vinifera]
Pbr006046.1	669	998	266	282.321	79.0924	-1.83573	Down	2.515e-92	1.53651e-90	K09060|1|7e-64|241|vvi:100248302|plant G-box-binding factor	-	GO:0003677//DNA binding	GO:0006351//transcription, DNA-dependent	gi|359489695|ref|XP_002279966.2|/7.22664e-63/PREDICTED: common plant regulatory factor 1-like [Vitis vinifera]
Pbr007887.1	2406	60	16	4.71949	1.32283	-1.835	Down	7.36526e-07	4.68198e-06	K06685|1|9e-12|70.9|ath:AT4G19050|maintenance of ploidy protein MOB1 (MPS1 binder 1);K13420|5|8e-08|57.8|rcu:RCOM_0633880|LRR receptor-like serine/threonine-protein kinase FLS2 [EC:2.7.11.1]	-	-	-	gi|196166343|gb|ACG70794.1|/0/NB-ARC domain-containing protein [Malus x domestica]
Pbr034293.1	624	90	24	27.2959	7.65079	-1.835	Down	1.17662e-09	1.00163e-08	-	-	-	-	gi|388510458|gb|AFK43295.1|/1.08357e-22/unknown [Medicago truncatula]
Pbr029074.1	588	2280	610	733.832	206.363	-1.83027	Down	1.18019e-207	1.63604e-205	-	-	-	-	gi|224132762|ref|XP_002327874.1|/3.86824e-32/predicted protein [Populus trichocarpa]
Pbr040493.1	867	332	89	72.47	20.4197	-1.82742	Down	1.20461e-31	2.77609e-30	-	-	GO:0004713//protein tyrosine kinase activity;GO:0016803	-	gi|255560992|ref|XP_002521508.1|/1.02006e-119/epoxide hydrolase, putative [Ricinus communis]
Pbr030728.1	555	749	201	255.404	72.0414	-1.82588	Down	3.08062e-69	1.39056e-67	-	-	-	-	gi|12003402|gb|AAG43558.1|AF211540_1/1.58307e-13/Avr9/Cf-9 rapidly elicited protein 75 [Nicotiana tabacum]
Pbr013906.1	1101	402	108	69.1	19.5126	-1.82428	Down	6.77726e-38	1.81986e-36	K01501|1|6e-07|53.5|rcu:RCOM_1258620|nitrilase [EC:3.5.5.1]	-	-	GO:0006351//transcription, DNA-dependent	gi|356574462|ref|XP_003555366.1|/3.19426e-66/PREDICTED: transcription factor TCP19-like [Glycine max]
Pbr005225.1	2124	93	25	8.28643	2.34134	-1.82342	Down	7.34236e-10	6.37965e-09	-	GO:0030312//external encapsulating structure	GO:0046872//metal ion binding;GO:0008092//cytoskeletal protein binding	-	gi|224129126|ref|XP_002320507.1|/0/predicted protein [Populus trichocarpa]
Pbr022863.1	1194	330	89	52.3057	14.8274	-1.8187	Down	2.86106e-31	6.5383e-30	-	GO:0042579//microbody	-	-	gi|225430850|ref|XP_002273885.1|/5.81174e-117/PREDICTED: UPF0496 protein At4g34320-like [Vitis vinifera]
Pbr000328.1	876	63	17	13.6105	3.86033	-1.81793	Down	4.56418e-07	2.97549e-06	-	-	GO:0003676//nucleic acid binding;GO:0046914//transition metal ion binding	-	gi|351726449|ref|NP_001236615.1|/1.09468e-52/Dof6 transcription factor [Glycine max]
Pbr038216.1	1395	37	10	5.01957	1.42595	-1.81564	Down	0.000124085	0.000572308	K13120|1|1e-141|501|vvi:100263357|protein FAM32A;K08900|2|5e-131|466|mtr:MTR_2g076970|mitochondrial chaperone BCS1	GO:0043231//intracellular membrane-bounded organelle	GO:0017111//nucleoside-triphosphatase activity;GO:0000166//nucleotide binding	-	gi|356542322|ref|XP_003539617.1|/3.78693e-142/PREDICTED: uncharacterized protein LOC100778503 [Glycine max]
Pbr037618.1	732	566	153	146.334	41.5776	-1.81538	Down	2.433e-52	8.7081e-51	K13422|1|2e-14|77.8|mtr:MTR_8g067280|transcription factor MYC2	GO:0043231//intracellular membrane-bounded organelle	GO:0001071//nucleic acid binding transcription factor activity;GO:0016628//oxidoreductase activity, acting on the CH-CH group of donors, NAD or NADP as acceptor	GO:0006351//transcription, DNA-dependent	gi|225445937|ref|XP_002263999.1|/4.06804e-105/PREDICTED: transcription factor bHLH35 [Vitis vinifera]
Pbr013292.1	1476	340	92	43.5945	12.3988	-1.81394	Down	4.63788e-32	1.08624e-30	K15397|1|0.0|669|pop:POPTR_566626|3-ketoacyl-CoA synthase [EC:2.3.1.-]	GO:0043231//intracellular membrane-bounded organelle	GO:0004312//fatty acid synthase activity	GO:0009314//response to radiation;GO:0006633//fatty acid biosynthetic process;GO:0000902//cell morphogenesis;GO:0007275//multicellular organismal development;GO:0003006//developmental process involved in reproduction;GO:0006950//response to stress	gi|269854053|gb|ACZ51240.1|/0/3-ketoacyl-CoA synthase [Arachis hypogaea]
Pbr027902.1	972	166	45	32.3207	9.20928	-1.8113	Down	2.16872e-16	2.90892e-15	-	-	-	-	gi|255548806|ref|XP_002515459.1|/7.04108e-35/conserved hypothetical protein [Ricinus communis]
Pbr013285.1	621	479	130	145.977	41.642	-1.80963	Down	2.29354e-44	7.20763e-43	-	-	-	-	gi|225423955|ref|XP_002282387.1|/1.0641e-46/PREDICTED: uncharacterized protein LOC100268142 [Vitis vinifera]
Pbr037912.1	726	213	58	55.5242	15.8917	-1.80484	Down	1.59042e-20	2.53845e-19	K15505|1|2e-07|54.3|smo:SELMODRAFT_180307|DNA repair protein RAD5 [EC:3.6.4.-]	-	GO:0003824//catalytic activity;GO:0046914//transition metal ion binding	-	gi|224140411|ref|XP_002323576.1|/1.46631e-115/predicted protein [Populus trichocarpa]
Pbr010850.1	972	895	244	174.259	49.9348	-1.80312	Down	5.1714e-81	2.77457e-79	K12134|1|9e-20|95.9|aly:ARALYDRAFT_904154|circadian clock associated 1;K12133|2|1e-19|95.5|ath:AT1G01060|LATE ELONGATED HYPOCOTYL	-	-	-	gi|71041112|gb|AAZ20444.1|/9.4671e-165/MYBR5 [Malus x domestica]
Pbr016185.1	615	1067	291	328.343	94.1233	-1.80258	Down	3.39526e-96	2.16638e-94	K14516|1|4e-24|109|rcu:RCOM_1007740|ethylene-responsive transcription factor 1;K14517|2|4e-23|105|ath:AT5G47220|ethylene-responsive transcription factor 2;K09286|3|9e-23|104|ath:AT4G17500|EREBP-like factor	-	-	GO:0006351//transcription, DNA-dependent	gi|381356172|gb|AFG26327.1|/3.54208e-79/ethylene response factor ERF2 [Eriobotrya japonica]
Pbr006874.1	555	44	12	15.0037	4.30098	-1.80258	Down	2.98388e-05	0.000152998	-	-	-	GO:0010876	gi|148807183|gb|ABR13301.1|/1.6231e-42/putative proline-rich cell wall protein [Prunus dulcis]
Pbr032127.1	429	95	26	41.9088	12.0558	-1.79753	Down	7.07236e-10	6.15289e-09	-	-	-	-	gi|224132456|ref|XP_002328279.1|/8.79395e-40/predicted protein [Populus trichocarpa]
Pbr036086.1	1782	179	49	19.0101	5.46975	-1.79722	Down	2.16982e-17	3.0497e-16	-	GO:0009536//plastid	GO:0016740//transferase activity	-	gi|255539657|ref|XP_002510893.1|/0/Xyloglucan galactosyltransferase KATAMARI1, putative [Ricinus communis]
Pbr020072.1	903	923	253	193.443	55.733	-1.79531	Down	5.27862e-83	2.93592e-81	-	GO:0031224//intrinsic to membrane	-	-	gi|224137246|ref|XP_002327078.1|/1.47021e-100/predicted protein [Populus trichocarpa]
Pbr011754.1	1155	62	17	10.1589	2.92783	-1.79485	Down	7.07614e-07	4.50869e-06	K01090|1|7e-80|295|osa:4341433|protein phosphatase [EC:3.1.3.16]	GO:0043234//protein complex	GO:0004721//phosphoprotein phosphatase activity;GO:0043169//cation binding	GO:0006464//cellular protein modification process	gi|255561441|ref|XP_002521731.1|/1.27421e-145/protein phosphatase 2c, putative [Ricinus communis]
Pbr032608.1	1356	342	94	47.7315	13.7895	-1.79138	Down	1.0218e-31	2.36478e-30	K09286|1|3e-46|184|ath:AT4G28140|EREBP-like factor	GO:0043231//intracellular membrane-bounded organelle	-	-	gi|386646588|gb|AFJ14638.1|/0/dehydration-responsive element-binding protein (DREB6), partial [Malus x domestica]
Pbr042572.1	1551	40	11	4.88076	1.41078	-1.79061	Down	7.58136e-05	0.000363674	K15397|1|0.0|922|vvi:100266256|3-ketoacyl-CoA synthase [EC:2.3.1.-]	GO:0044464//cell part	GO:0016747//transferase activity, transferring acyl groups other than amino-acyl groups	GO:0009314//response to radiation;GO:0006950//response to stress;GO:0006631//fatty acid metabolic process	gi|225445394|ref|XP_002284986.1|/0/PREDICTED: 3-ketoacyl-CoA synthase 11 [Vitis vinifera]
Pbr015426.1	1311	40	11	5.77426	1.66905	-1.79061	Down	7.58136e-05	0.000363737	-	-	-	-	gi|224117510|ref|XP_002317594.1|/6.70389e-61/predicted protein [Populus trichocarpa]
Pbr021518.1	927	178	49	36.3395	10.5147	-1.78914	Down	3.3353e-17	4.64713e-16	K15746|1|7e-117|418|rcu:RCOM_1582530|beta-carotene 3-hydroxylase [EC:1.14.13.129]	GO:0016020//membrane	-	GO:0008152//metabolic process	gi|328909633|gb|AEB61491.1|/2.78681e-118/beta carotene hydroxylase-1 [Morus indica]
Pbr007168.1	1710	138	38	15.2729	4.42045	-1.78871	Down	1.18657e-13	1.36095e-12	K12126|1|9e-06|50.4|ath:AT1G09530|phytochrome-interacting factor 3	-	GO:0005488//binding;GO:0001071//nucleic acid binding transcription factor activity	GO:0006351//transcription, DNA-dependent;GO:0043401//steroid hormone mediated signaling pathway	gi|255547079|ref|XP_002514597.1|/0/Transcription factor BIM1, putative [Ricinus communis]
Pbr013668.1	732	196	54	50.6739	14.6745	-1.78793	Down	8.84432e-19	1.32781e-17	-	-	-	-	gi|239056184|emb|CAQ58619.1|/8.92155e-44/unknown protein [Vitis vinifera]
Pbr027852.1	1965	105	29	10.1127	2.93572	-1.78438	Down	1.10591e-10	1.02551e-09	-	GO:0043231//intracellular membrane-bounded organelle;GO:0044444//cytoplasmic part;GO:0016020//membrane	GO:0005543//phospholipid binding;GO:0016491//oxidoreductase activity;GO:0005515//protein binding	GO:0009987//cellular process	gi|356507716|ref|XP_003522610.1|/0/PREDICTED: putative clathrin assembly protein At2g25430-like [Glycine max]
Pbr011725.1	2208	76	21	6.51409	1.89191	-1.78372	Down	4.34148e-08	3.18628e-07	K04733|1|6e-47|187|smo:SELMODRAFT_159261|interleukin-1 receptor-associated kinase 4 [EC:2.7.11.1];K13430|3|3e-44|178|zma:100283091|serine/threonine-protein kinase PBS1 [EC:2.7.11.1]	GO:0043231//intracellular membrane-bounded organelle	GO:0004672//protein kinase activity;GO:0000166//nucleotide binding	-	gi|255575267|ref|XP_002528537.1|/0/serine-threonine protein kinase, plant-type, putative [Ricinus communis]
Pbr026271.1	1470	673	186	86.6437	25.1695	-1.78342	Down	1.85756e-60	7.39476e-59	K08900|1|0.0|639|pop:POPTR_248199|mitochondrial chaperone BCS1	-	GO:0032559;GO:0016462//pyrophosphatase activity	-	gi|356572218|ref|XP_003554267.1|/0/PREDICTED: probable mitochondrial chaperone BCS1-B-like [Glycine max]
Pbr016375.1	1290	521	144	76.4341	22.2051	-1.78333	Down	3.49184e-47	1.15727e-45	K00924|1|4e-119|426|ath:AT4G35600|[EC:2.7.1.-]	-	GO:0004713//protein tyrosine kinase activity;GO:0032559	GO:0006464//cellular protein modification process	gi|255572432|ref|XP_002527153.1|/0/serine/threonine-protein kinase cx32, putative [Ricinus communis]
Pbr001362.1	969	1624	449	317.177	92.1726	-1.78288	Down	2.83254e-143	2.69526e-141	K09286|1|4e-47|186|pop:POPTR_588763|EREBP-like factor	-	-	GO:0009743//response to carbohydrate stimulus	gi|292668995|gb|ADE41152.1|/2.11806e-132/AP2 domain class transcription factor [Malus x domestica]
Pbr010503.2	1248	358	99	54.2885	15.7797	-1.78257	Down	6.50498e-33	1.56377e-31	K09561|1|1e-05|49.7|vcn:VOLCADRAFT_67840|STIP1 homology and U-box containing protein 1 [EC:6.3.2.19]	-	GO:0033612//receptor serine/threonine kinase binding;GO:0019787//small conjugating protein ligase activity	GO:0009743//response to carbohydrate stimulus;GO:0032446//protein modification by small protein conjugation	gi|224062920|ref|XP_002300932.1|/1.87e-105/predicted protein [Populus trichocarpa]
Pbr029971.1	3435	94	26	5.17893	1.50566	-1.78226	Down	1.0902e-09	9.31839e-09	K13420|1|1e-112|406|pop:POPTR_1075175|LRR receptor-like serine/threonine-protein kinase FLS2 [EC:2.7.11.1];K00924|4|7e-104|377|ath:AT1G75820|[EC:2.7.1.-]	GO:0016020//membrane	GO:0000166//nucleotide binding;GO:0016301//kinase activity	GO:0051259//protein oligomerization;GO:0009856//pollination;GO:0009698//phenylpropanoid metabolic process;GO:0009555//pollen development;GO:0003006//developmental process involved in reproduction;GO:0000578//embryonic axis specification;GO:0006950//response to stress	gi|224098986|ref|XP_002311344.1|/0/predicted protein [Populus trichocarpa]
Pbr007396.1	1224	65	18	10.0501	2.9253	-1.78056	Down	4.37054e-07	2.85607e-06	K00517|1|2e-57|221|ath:AT3G48360|[EC:1.14.-.-];K04498|3|5e-15|80.5|ppp:PHYPADRAFT_10108|E1A/CREB-binding protein [EC:2.3.1.48]	GO:0043231//intracellular membrane-bounded organelle;GO:0031090//organelle membrane;GO:0005737//cytoplasm	GO:0005515//protein binding	GO:0009725//response to hormone stimulus;GO:0000302//response to reactive oxygen species;GO:0048229//gametophyte development;GO:0006970//response to osmotic stress	gi|296084325|emb|CBI24713.3|/2.04703e-157/unnamed protein product [Vitis vinifera]
Pbr016329.1	2826	3058	847	204.788	59.6198	-1.78027	Down	1.68289e-267	3.10527e-265	K13457|1|0.0|636|vvi:100252764|disease resistance protein RPM1	-	GO:0000166//nucleotide binding	-	gi|400296111|gb|AFP82245.1|/0/NBS-LRR type disease resistance protein [Malus x domestica]
Pbr026538.1	444	13359	3704	5694.17	1659.46	-1.77877	Down	0	0	K02639|1|7e-35|144|vvi:100249080|ferredoxin	-	GO:0005488//binding	-	gi|338173755|gb|AEI83424.1|/7.80053e-36/chloroplast ferredoxin I [Camellia sinensis]
Pbr019675.1	1029	256	71	47.083	13.7253	-1.77837	Down	6.61816e-24	1.20651e-22	K13425|1|4e-24|110|rcu:RCOM_1616660|WRKY transcription factor 22	-	GO:0005515//protein binding	-	gi|225458699|ref|XP_002284966.1|/1.05851e-92/PREDICTED: probable WRKY transcription factor 7 [Vitis vinifera]
Pbr040149.1	2892	155	43	10.1431	2.95767	-1.77797	Down	4.7718e-15	5.95581e-14	K08286|1|1e-104|379|aly:ARALYDRAFT_491919|protein-serine/threonine kinase [EC:2.7.11.-];K00924|3|2e-102|372|ath:AT1G28440|[EC:2.7.1.-];K13415|5|3e-92|338|osa:4324691|protein brassinosteroid insensitive 1 [EC:2.7.10.1 2.7.11.1]	GO:0016020//membrane	GO:0016301//kinase activity;GO:0000166//nucleotide binding	GO:0008152//metabolic process	gi|224145191|ref|XP_002325559.1|/0/predicted protein [Populus trichocarpa]
Pbr029169.1	624	281	78	85.2238	24.8651	-1.77714	Down	4.5614e-26	8.92955e-25	-	-	-	-	gi|388510458|gb|AFK43295.1|/1.91269e-19/unknown [Medicago truncatula]
Pbr017608.1	801	36	10	8.50568	2.4834	-1.77611	Down	0.000193366	0.000859616	-	-	-	-	gi|147841967|emb|CAN63134.1|/8.6378e-14/hypothetical protein VITISV_001461 [Vitis vinifera]
Pbr029551.1	1311	187	52	26.9947	7.89005	-1.77457	Down	8.15866e-18	1.17019e-16	K15400|1|7e-63|239|rcu:RCOM_1447050|omega-hydroxypalmitate O-feruloyl transferase [EC:2.3.1.188]	-	-	-	gi|41323261|gb|AAR99826.1|/0/alcohol acyl transferase [Malus x domestica]
Pbr017798.1	1551	176	49	21.4753	6.2844	-1.77283	Down	7.85308e-17	1.07284e-15	-	-	-	-	gi|224069012|ref|XP_002326253.1|/5.22269e-79/predicted protein [Populus trichocarpa]
Pbr007871.1	2049	79	22	7.29666	2.1358	-1.77246	Down	2.68858e-08	2.01433e-07	K05864|1|1e-147|522|vvi:100262316|peptidyl-prolyl isomerase D [EC:5.2.1.8]	GO:0044424//intracellular part	GO:0016859//cis-trans isomerase activity	GO:0003006//developmental process involved in reproduction;GO:0009791//post-embryonic development;GO:0044267//cellular protein metabolic process	gi|225428707|ref|XP_002284980.1|/1.07082e-146/PREDICTED: peptidyl-prolyl cis-trans isomerase CYP40 [Vitis vinifera]
Pbr009671.1	960	190	53	37.456	10.9821	-1.77005	Down	5.09922e-18	7.39536e-17	-	-	-	-	gi|224104117|ref|XP_002313325.1|/1.03826e-38/predicted protein [Populus trichocarpa]
Pbr025865.1	3021	43	12	2.69375	0.790151	-1.76941	Down	4.63202e-05	0.000231	K00924|1|0.0|682|aly:ARALYDRAFT_476729|[EC:2.7.1.-];K08286|5|1e-180|632|ath:AT4G28490|protein-serine/threonine kinase [EC:2.7.11.-]	GO:0031224//intrinsic to membrane;GO:0031410//cytoplasmic vesicle	GO:0016628//oxidoreductase activity, acting on the CH-CH group of donors, NAD or NADP as acceptor;GO:0032559;GO:0004702//receptor signaling protein serine/threonine kinase activity	GO:0010065;GO:0007167//enzyme linked receptor protein signaling pathway;GO:0006464//cellular protein modification process	gi|224065541|ref|XP_002301848.1|/0/predicted protein [Populus trichocarpa]
Pbr020812.1	228	218	61	180.951	53.2199	-1.76556	Down	2.16496e-20	3.43538e-19	-	-	-	-	gi|372477816|gb|AEX97102.1|/1.94866e-23/metallothionein protein, partial [Malus x domestica]
Pbr015019.1	1161	986	276	160.725	47.2886	-1.76503	Down	1.57769e-86	9.0136e-85	K13424|1|1e-26|119|osa:4338474|WRKY transcription factor 33	-	-	GO:0050896//response to stimulus	gi|302399139|gb|ADL36864.1|/3.84815e-158/WRKY domain class transcription factor [Malus x domestica]
Pbr038859.1	480	132	37	52.0441	15.3334	-1.76305	Down	6.88514e-13	7.51204e-12	K13448|1|3e-45|178|ath:AT1G18210|calcium-binding protein CML	GO:0016020//membrane;GO:0043231//intracellular membrane-bounded organelle	GO:0046872//metal ion binding	-	gi|14589311|emb|CAC43238.1|/9.4503e-50/calcium binding protein [Sesbania rostrata]
Pbr003950.1	1344	8397	2358	1182.4	348.999	-1.76042	Down	0	0	K14190|1|0.0|705|rcu:RCOM_0278070|GDP-L-galactose phosphorylase [EC:2.7.7.69]	-	-	-	gi|225380880|gb|ACN88681.1|/0/VTC2-like protein [Malus x domestica]
Pbr017405.1	1131	398	112	66.5977	19.6986	-1.75738	Down	9.8607e-36	2.50732e-34	-	GO:0031224//intrinsic to membrane	GO:0046914//transition metal ion binding	-	gi|224132924|ref|XP_002327913.1|/1.07749e-40/predicted protein [Populus trichocarpa]
Pbr001816.1	1629	334	94	38.8029	11.4785	-1.75723	Down	3.06914e-30	6.79766e-29	K15015|1|2e-179|627|vvi:100265815|solute carrier family 32 (vesicular inhibitory amino acid transporter)	GO:0031090//organelle membrane	GO:0005275//amine transmembrane transporter activity	-	gi|359482241|ref|XP_002266914.2|/1.36888e-178/PREDICTED: vacuolar amino acid transporter 1-like [Vitis vinifera]
Pbr026157.1	1635	1563	440	180.917	53.5321	-1.75685	Down	3.24398e-135	2.91414e-133	K14497|1|0.0|667|rcu:RCOM_0654770|protein phosphatase 2C [EC:3.1.3.16]	-	GO:0004721//phosphoprotein phosphatase activity	-	gi|255560709|ref|XP_002521368.1|/0/protein phosphatase 2c, putative [Ricinus communis]
Pbr018885.1	471	71	20	28.5283	8.44673	-1.75593	Down	1.66548e-07	1.14594e-06	-	-	-	GO:0050896//response to stimulus	gi|356569977|ref|XP_003553169.1|/5.02368e-45/PREDICTED: TMV resistance protein N-like [Glycine max]
Pbr028132.1	510	39	11	14.4722	4.29044	-1.75408	Down	0.000117623	0.000544064	-	GO:0044425//membrane part	GO:0004872//receptor activity;GO:0032559	GO:0006952//defense response;GO:0012501//programmed cell death;GO:0023052//signaling	gi|357486483|ref|XP_003613529.1|/2.88711e-50/TMV resistance protein N [Medicago truncatula]
Pbr029978.1	1569	131	37	15.8011	4.69092	-1.75208	Down	1.05425e-12	1.13707e-11	K00517|1|0.0|654|ath:AT1G13710|[EC:1.14.-.-];K05280|5|3e-74|277|mtr:MTR_3g025230|flavonoid 3'-monooxygenase [EC:1.14.13.21]	GO:0043231//intracellular membrane-bounded organelle	GO:0016709//oxidoreductase activity, acting on paired donors, with incorporation or reduction of molecular oxygen, NADH or NADPH as one donor, and incorporation of one atom of oxygen;GO:0005506//iron ion binding	GO:0009965//leaf morphogenesis;GO:0010073//meristem maintenance;GO:0045927//positive regulation of growth;GO:0008152//metabolic process;GO:0003006//developmental process involved in reproduction;GO:0008283//cell proliferation	gi|225456565|ref|XP_002265310.1|/0/PREDICTED: cytochrome P450 78A4 isoform 1 [Vitis vinifera]
Pbr000321.4	1761	223	63	23.9654	7.1164	-1.75173	Down	1.29188e-20	2.07042e-19	K00422|1|6e-143|506|vvi:100256583|polyphenol oxidase [EC:1.10.3.1]	GO:0044424//intracellular part	-	-	gi|388254197|gb|ADF59058.2|/0/polyphenol oxidase IV [Pyrus x bretschneideri]
Pbr015024.1	576	297	84	97.5827	29.0092	-1.75011	Down	6.41192e-27	1.30382e-25	K02183|1|2e-07|53.9|cme:CME034C|calmodulin;K13448|2|2e-07|53.9|ath:AT2G43290|calcium-binding protein CML	GO:0044444//cytoplasmic part	GO:0046872//metal ion binding	GO:0009725//response to hormone stimulus;GO:0006972//hyperosmotic response;GO:0009639//response to red or far red light	gi|224101537|ref|XP_002312322.1|/1.13631e-49/predicted protein [Populus trichocarpa]
Pbr019685.1	1119	53	15	8.96365	2.66649	-1.74914	Down	6.87946e-06	3.85931e-05	-	-	GO:0003824//catalytic activity	-	gi|356553982|ref|XP_003545329.1|/1.31979e-91/PREDICTED: probable carbohydrate esterase At4g34215-like [Glycine max]
Pbr000711.1	366	81	23	41.8835	12.5005	-1.7444	Down	2.55476e-08	1.91934e-07	-	-	-	GO:0006950//response to stress	gi|356499167|ref|XP_003518414.1|/6.3966e-30/PREDICTED: uncharacterized protein LOC100780743 [Glycine max]
Pbr004829.1	4320	2162	614	94.7133	28.2725	-1.74417	Down	1.94588e-184	2.31043e-182	K12843|1|1e-52|207|vvi:100248403|U4/U6 small nuclear ribonucleoprotein PRP3;K05681|3|2e-52|207|cme:CMS467C|ATP-binding cassette, subfamily G (WHITE), member 2	GO:0031224//intrinsic to membrane	GO:0017111//nucleoside-triphosphatase activity;GO:0015604//organic phosphonate transmembrane transporter activity;GO:0032559	GO:0009207;GO:0051234//establishment of localization	gi|147855195|emb|CAN83834.1|/0/hypothetical protein VITISV_006821 [Vitis vinifera]
Pbr033933.1	1113	95	27	16.1535	4.82556	-1.74308	Down	1.594e-09	1.34105e-08	K04371|1|0.0|679|pop:POPTR_833180|extracellular signal-regulated kinase 1/2 [EC:2.7.11.24]	-	GO:0004702//receptor signaling protein serine/threonine kinase activity;GO:0032559	GO:0010374//stomatal complex development;GO:0010375//stomatal complex patterning;GO:0003006//developmental process involved in reproduction;GO:0051707//response to other organism;GO:0000161//MAPK cascade involved in osmosensory signaling pathway;GO:0009755//hormone-mediated signaling pathway;GO:0009700//indole phytoalexin biosynthetic process;GO:0006464//cellular protein modification process;GO:0…	gi|359904141|gb|AEV89968.1|/0/mitogen activated protein kinase [Humulus lupulus]
Pbr017022.1	1299	137	39	19.9595	5.97221	-1.74074	Down	4.07682e-13	4.51659e-12	K00942|1|6e-169|592|rcu:RCOM_0751830|guanylate kinase [EC:2.7.4.8]	-	GO:0016776//phosphotransferase activity, phosphate group as acceptor	GO:0009117//nucleotide metabolic process;GO:0006796//phosphate-containing compound metabolic process	gi|255577505|ref|XP_002529631.1|/6.25115e-168/guanylate kinase, putative [Ricinus communis]
Pbr019478.1	678	42	12	11.7235	3.52072	-1.73547	Down	7.15902e-05	0.00034499	-	-	-	-	-
Pbr001529.1	1533	42	12	5.18497	1.55711	-1.73547	Down	7.15902e-05	0.000345051	-	-	-	-	gi|359474056|ref|XP_002275095.2|/2.12562e-133/PREDICTED: uncharacterized protein LOC100242735 [Vitis vinifera]
Pbr015082.1	1158	42	12	6.86404	2.06135	-1.73547	Down	7.15902e-05	0.000345112	K01090|1|5e-98|356|rcu:RCOM_1053570|protein phosphatase [EC:3.1.3.16]	GO:0043234//protein complex	GO:0004721//phosphoprotein phosphatase activity;GO:0043169//cation binding	GO:0006464//cellular protein modification process	gi|359491854|ref|XP_002273511.2|/1.44997e-173/PREDICTED: probable protein phosphatase 2C 27 isoform 2 [Vitis vinifera]
Pbr022573.1	2133	105	30	9.31617	2.79776	-1.73547	Down	2.47722e-10	2.2386e-09	-	GO:0016020//membrane	GO:0015103//inorganic anion transmembrane transporter activity	GO:0015698//inorganic anion transport	gi|356540077|ref|XP_003538517.1|/0/PREDICTED: sulfate transporter 2.1-like [Glycine max]
Pbr037838.1	1470	56	16	7.20958	2.16512	-1.73547	Down	4.21838e-06	2.43706e-05	K05917|1|0.0|827|pop:POPTR_48605|cytochrome P450, family 51 (sterol 14-demethylase) [EC:1.14.13.70]	GO:0043231//intracellular membrane-bounded organelle;GO:0016020//membrane	GO:0016709//oxidoreductase activity, acting on paired donors, with incorporation or reduction of molecular oxygen, NADH or NADPH as one donor, and incorporation of one atom of oxygen;GO:0005506//iron ion binding;GO:0016741	GO:0006694//steroid biosynthetic process;GO:0006730//one-carbon metabolic process	gi|224057852|ref|XP_002299356.1|/0/cytochrome P450 obtusifoliol 14-alpha-demethylase [Populus trichocarpa]
Pbr033459.1	543	77	22	26.8368	8.05939	-1.73547	Down	6.34084e-08	4.57495e-07	-	GO:0031410//cytoplasmic vesicle	-	-	gi|312599845|gb|ADQ91848.1|/9.21184e-64/late embryogenesis abundant protein group 9 protein [Arachis hypogaea]
Pbr013576.1	1272	815	233	121.258	36.4375	-1.73458	Down	3.74666e-70	1.72834e-68	K14497|1|8e-78|289|gmx:100818568|protein phosphatase 2C [EC:3.1.3.16]	-	GO:0016787//hydrolase activity	-	gi|4336434|gb|AAD17804.1|/3.4156e-78/nodule-enhanced protein phosphatase type 2C [Lotus japonicus]
Pbr016049.2	1071	7578	2169	1339.07	402.856	-1.7329	Down	0	0	K09286|1|3e-74|276|vvi:100245515|EREBP-like factor	-	GO:0005488//binding	GO:0009314//response to radiation;GO:0009651//response to salt stress;GO:0007165//signal transduction;GO:0010467//gene expression	gi|386646590|gb|AFJ14639.1|/1.9394e-145/dehydration-responsive element-binding protein (DREB6), partial [Malus x domestica]
Pbr003751.1	654	143	41	41.3807	12.4705	-1.73043	Down	1.57507e-13	1.79373e-12	K05283|1|2e-15|80.5|aly:ARALYDRAFT_354960|phosphatidylinositol glycan, class W [EC:2.3.-.-];K11982|2|5e-15|79.3|sbi:SORBI_03g011120|E3 ubiquitin-protein ligase RNF115/126 [EC:6.3.2.19];K15692|5|3e-11|66.6|smo:SELMODRAFT_66937|E3 ubiquitin-protein ligase RNF13 [EC:6.3.2.19]	-	GO:0046872//metal ion binding	-	gi|225448677|ref|XP_002275084.1|/4.77506e-56/PREDICTED: RING-H2 finger protein ATL72 [Vitis vinifera]
Pbr021658.1	1650	122	35	13.9931	4.21952	-1.72957	Down	9.74106e-12	9.74427e-11	-	-	-	-	gi|224109332|ref|XP_002315162.1|/9.93513e-76/predicted protein [Populus trichocarpa]
Pbr003421.1	660	80	23	22.9396	6.93208	-1.72648	Down	3.91172e-08	2.88483e-07	-	GO:0016020//membrane	-	-	gi|224072044|ref|XP_002303614.1|/6.58406e-53/predicted protein [Populus trichocarpa]
Pbr039066.1	1998	118	34	11.177	3.38503	-1.72329	Down	2.39512e-11	2.33268e-10	K14486|1|2e-68|258|pop:POPTR_589324|auxin response factor	-	GO:0005488//binding	GO:0009725//response to hormone stimulus;GO:0050794//regulation of cellular process	gi|225449038|ref|XP_002273590.1|/0/PREDICTED: auxin response factor 18 [Vitis vinifera]
Pbr012908.1	1071	52	15	9.18868	2.786	-1.72166	Down	1.05781e-05	5.77176e-05	-	-	-	-	gi|225437154|ref|XP_002280618.1|/2.3123e-114/PREDICTED: heat stress transcription factor A-6b [Vitis vinifera]
Pbr020241.1	513	90	26	33.202	10.0817	-1.71953	Down	6.02254e-09	4.80484e-08	-	GO:0044464//cell part	-	-	gi|255541840|ref|XP_002511984.1|/4.39266e-46/Oleosin, putative [Ricinus communis]
Pbr016154.1	1086	83	24	14.464	4.39603	-1.71819	Down	2.41298e-08	1.81883e-07	-	GO:0044464//cell part	-	-	gi|224114702|ref|XP_002316834.1|/7.75477e-158/predicted protein [Populus trichocarpa]
Pbr032603.1	552	3146	910	1078.6	327.93	-1.71769	Down	7.81434e-262	1.41326e-259	K01602|1|3e-80|295|rcu:RCOM_1571640|ribulose-bisphosphate carboxylase small chain [EC:4.1.1.39]	GO:0009536//plastid	GO:0016491//oxidoreductase activity;GO:0016831//carboxy-lyase activity	GO:0043094;GO:0015977//carbon fixation	gi|132153|sp|P24007.1|RBS_PYRPY/7.8289e-90/RecName: Full=Ribulose bisphosphate carboxylase small chain, chloroplastic; Short=RuBisCO small subunit; Flags: Precursor
Pbr005341.1	417	259	75	117.545	35.7771	-1.7161	Down	4.49384e-23	7.97934e-22	-	-	-	-	-
Pbr004806.1	585	404	117	130.697	39.7841	-1.71596	Down	4.1078e-35	1.03296e-33	-	-	-	-	gi|255573042|ref|XP_002527451.1|/9.66742e-52/conserved hypothetical protein [Ricinus communis]
Pbr024792.1	1338	317	92	44.8376	13.6776	-1.71289	Down	7.93246e-28	1.65238e-26	K13065|1|4e-21|100|pop:POPTR_784746|shikimate O-hydroxycinnamoyltransferase [EC:2.3.1.133]	-	GO:0016746//transferase activity, transferring acyl groups	-	gi|224107651|ref|XP_002314550.1|/7.0402e-106/predicted protein [Populus trichocarpa]
Pbr025748.1	741	124	36	31.6696	9.66415	-1.71238	Down	9.20162e-12	9.2351e-11	-	-	-	-	gi|302398683|gb|ADL36636.1|/4.32162e-94/C2H2L domain class transcription factor [Malus x domestica]
Pbr024191.1	2859	155	45	10.2602	3.13096	-1.71238	Down	2.34598e-14	2.80624e-13	K04733|1|1e-67|256|smo:SELMODRAFT_159261|interleukin-1 receptor-associated kinase 4 [EC:2.7.11.1];K13430|3|7e-65|247|rcu:RCOM_1078760|serine/threonine-protein kinase PBS1 [EC:2.7.11.1];K13418|5|6e-64|244|aly:ARALYDRAFT_895025|somatic embryogenesis receptor kinase 1 [EC:2.7.10.1 2.7.11.1]	-	GO:0004672//protein kinase activity	-	gi|359493983|ref|XP_002283596.2|/0/PREDICTED: probable leucine-rich repeat receptor-like serine/threonine-protein kinase At3g14840-like [Vitis vinifera]
Pbr038243.1	1758	1184	344	127.459	38.9241	-1.7113	Down	3.10468e-99	2.06291e-97	K07300|1|7e-08|57.4|aly:ARALYDRAFT_482825|Ca2+:H+ antiporter	GO:0005773//vacuole;GO:0031224//intrinsic to membrane;GO:0031090//organelle membrane	GO:0046872//metal ion binding	GO:0006810//transport	gi|359493612|ref|XP_003634635.1|/0/PREDICTED: uncharacterized protein LOC100264164 [Vitis vinifera]
Pbr025627.1	504	148	43	55.5738	16.9714	-1.7113	Down	9.24744e-14	1.06646e-12	-	-	-	-	-
Pbr001416.1	3588	220	64	11.604	3.54819	-1.70947	Down	1.00007e-19	1.54737e-18	-	-	GO:0005488//binding	-	gi|255559733|ref|XP_002520886.1|/2.75966e-111/hypothetical protein RCOM_0690150 [Ricinus communis]
Pbr014749.1	1299	3145	916	458.195	140.27	-1.70775	Down	1.22721e-259	2.16218e-257	K01915|1|0.0|738|pop:POPTR_725763|glutamine synthetase [EC:6.3.1.2]	GO:0009536//plastid	GO:0016211//ammonia ligase activity;GO:0032559	GO:0006541//glutamine metabolic process	gi|26892028|gb|AAN84537.1|/0/putative plastidic glutamine synthetase [Crataegus crus-galli]
Pbr010765.1	2271	151	44	12.5834	3.85403	-1.70709	Down	5.74004e-14	6.68749e-13	-	GO:0031410//cytoplasmic vesicle	GO:0016787//hydrolase activity	GO:0008152//metabolic process	gi|255543843|ref|XP_002512984.1|/0/Xylem serine proteinase 1 precursor, putative [Ricinus communis]
Pbr017950.1	2133	72	21	6.38823	1.95843	-1.70572	Down	2.40644e-07	1.62748e-06	-	GO:0016020//membrane	-	GO:0000904//cell morphogenesis involved in differentiation	gi|356571352|ref|XP_003553842.1|/0/PREDICTED: uncharacterized protein LOC100786477 [Glycine max]
Pbr029671.1	2817	202	59	13.5707	4.16624	-1.70368	Down	3.73946e-18	5.44645e-17	K08286|1|3e-135|481|aly:ARALYDRAFT_491919|protein-serine/threonine kinase [EC:2.7.11.-];K00924|3|1e-124|446|aly:ARALYDRAFT_473063|[EC:2.7.1.-]	-	GO:0004672//protein kinase activity	-	gi|359484862|ref|XP_002274094.2|/0/PREDICTED: probable LRR receptor-like serine/threonine-protein kinase At4g08850-like [Vitis vinifera]
Pbr021045.1	447	623	182	263.766	80.9922	-1.70341	Down	1.01609e-52	3.67527e-51	K06689|1|6e-86|313|mtr:MTR_7g116940|ubiquitin-conjugating enzyme E2 D/E [EC:6.3.2.19]	-	GO:0016879//ligase activity, forming carbon-nitrogen bonds;GO:0032559	GO:0006464//cellular protein modification process	gi|351726353|ref|NP_001235332.1|/5.47537e-85/uncharacterized protein LOC100305945 [Glycine max]
Pbr036238.1	999	219	64	41.4875	12.7437	-1.7029	Down	1.5162e-19	2.33273e-18	-	GO:0031410//cytoplasmic vesicle	GO:0046914//transition metal ion binding	-	gi|224110810|ref|XP_002315643.1|/9.11553e-102/predicted protein [Populus trichocarpa]
Pbr021357.2	1728	653	191	71.5169	21.9872	-1.70162	Down	4.26032e-55	1.59595e-53	K08286|1|0.0|833|osa:4339288|protein-serine/threonine kinase [EC:2.7.11.-];K08790|2|0.0|823|pop:POPTR_761359|serine/threonine kinase 38 [EC:2.7.11.1]	-	GO:0004672//protein kinase activity;GO:0032559	GO:0006464//cellular protein modification process	gi|225444175|ref|XP_002271235.1|/0/PREDICTED: serine/threonine-protein kinase 38-like [Vitis vinifera]
Pbr013393.1	534	663	194	234.969	72.267	-1.70106	Down	6.87108e-56	2.59892e-54	-	-	-	-	gi|224099449|ref|XP_002311488.1|/7.87134e-52/predicted protein [Populus trichocarpa]
Pbr020181.1	1902	41	12	4.07955	1.25502	-1.7007	Down	0.000110143	0.00051268	-	GO:0031090//organelle membrane	-	GO:0009832//plant-type cell wall biogenesis	gi|224124110|ref|XP_002330107.1|/0/predicted protein [Populus trichocarpa]
Pbr020310.1	1263	133	39	19.9291	6.14244	-1.69799	Down	2.18926e-12	2.30836e-11	K02183|1|1e-29|129|aly:ARALYDRAFT_495855|calmodulin	-	-	-	gi|224133108|ref|XP_002321484.1|/3.90467e-42/predicted protein [Populus trichocarpa]
Pbr011333.1	1476	714	210	91.5484	28.3017	-1.69365	Down	1.0693e-59	4.21987e-58	-	-	-	GO:0042742//defense response to bacterium;GO:0010033//response to organic substance	gi|255571859|ref|XP_002526872.1|/0/conserved hypothetical protein [Ricinus communis]
Pbr013953.1	954	533	157	105.735	32.7364	-1.69148	Down	6.4503e-45	2.05065e-43	-	-	-	GO:0009743//response to carbohydrate stimulus	gi|302398873|gb|ADL36731.1|/3.83354e-102/HSF domain class transcription factor [Malus x domestica]
Pbr004624.1	2406	78	23	6.13533	1.90157	-1.68995	Down	9.09986e-08	6.46147e-07	K06685|1|2e-11|69.7|ath:AT4G19050|maintenance of ploidy protein MOB1 (MPS1 binder 1)	-	-	-	gi|196166343|gb|ACG70794.1|/0/NB-ARC domain-containing protein [Malus x domestica]
Pbr020081.1	888	139	41	29.6238	9.18439	-1.6895	Down	8.40258e-13	9.10941e-12	K14503|1|5e-88|322|rcu:RCOM_1593760|brassinosteroid resistant 1/2	GO:0043231//intracellular membrane-bounded organelle;GO:0044444//cytoplasmic part	GO:0003676//nucleic acid binding;GO:0001071//nucleic acid binding transcription factor activity	GO:0043401//steroid hormone mediated signaling pathway;GO:0010467//gene expression	gi|255538564|ref|XP_002510347.1|/5.27145e-87/BRASSINAZOLE-RESISTANT 1 protein, putative [Ricinus communis]
Pbr014456.1	1326	44	13	6.27984	1.9502	-1.6871	Down	6.68712e-05	0.000324482	-	-	-	-	gi|225452173|ref|XP_002270738.1|/1.73631e-56/PREDICTED: uncharacterized protein LOC100249110 [Vitis vinifera]
Pbr012988.1	1593	44	13	5.22728	1.62333	-1.6871	Down	6.68712e-05	0.00032454	K01626|1|0.0|858|vvi:100258475|3-deoxy-7-phosphoheptulonate synthase [EC:2.5.1.54]	GO:0009536//plastid	GO:0016765//transferase activity, transferring alkyl or aryl (other than methyl) groups	GO:0008652//cellular amino acid biosynthetic process	gi|359496691|ref|XP_003635302.1|/0/PREDICTED: phospho-2-dehydro-3-deoxyheptonate aldolase 1, chloroplastic [Vitis vinifera]
Pbr014442.1	2895	142	42	9.2828	2.88589	-1.68554	Down	5.20512e-13	5.73634e-12	-	GO:0016020//membrane	-	-	gi|255536959|ref|XP_002509546.1|/0/conserved hypothetical protein [Ricinus communis]
Pbr010608.1	1155	770	228	126.168	39.2674	-1.68394	Down	9.76264e-64	4.07657e-62	K00894|1|4e-169|592|vvi:100256116|ethanolamine kinase [EC:2.7.1.82]	-	GO:0016301//kinase activity	GO:0006796//phosphate-containing compound metabolic process	gi|147821402|emb|CAN63497.1|/4.8084e-169/hypothetical protein VITISV_011672 [Vitis vinifera]
Pbr023902.1	984	3340	989	642.378	199.931	-1.68392	Down	3.16212e-270	5.99683e-268	K09286|1|5e-49|192|gmx:100800788|EREBP-like factor	GO:0043231//intracellular membrane-bounded organelle	GO:0001071//nucleic acid binding transcription factor activity	GO:0000160//two-component signal transduction system (phosphorelay);GO:0009743//response to carbohydrate stimulus;GO:0006351//transcription, DNA-dependent;GO:0006950//response to stress	gi|292668893|gb|ADE41101.1|/2.94822e-113/AP2 domain class transcription factor [Malus x domestica]
Pbr038494.1	1629	2452	727	284.865	88.7754	-1.68204	Down	1.30493e-198	1.69697e-196	K14494|1|6e-57|220|pop:POPTR_645273|DELLA protein	-	-	GO:0006351//transcription, DNA-dependent;GO:0009743//response to carbohydrate stimulus	gi|302399041|gb|ADL36815.1|/0/SCL domain class transcription factor [Malus x domestica]
Pbr028955.1	888	138	41	29.4107	9.18439	-1.67908	Down	1.2721e-12	1.36502e-11	-	GO:0009532//plastid stroma	-	-	gi|224125100|ref|XP_002319500.1|/8.37706e-101/predicted protein [Populus trichocarpa]
Pbr024653.1	1662	74	22	8.42636	2.63312	-1.67813	Down	2.25112e-07	1.52849e-06	-	GO:0044464//cell part	-	GO:0010038//response to metal ion	gi|224058425|ref|XP_002299503.1|/0/predicted protein [Populus trichocarpa]
Pbr017600.1	1128	824	245	138.247	43.2052	-1.67798	Down	9.44676e-68	4.17446e-66	-	GO:0044444//cytoplasmic part	GO:0031072//heat shock protein binding	GO:0003006//developmental process involved in reproduction	gi|255553317|ref|XP_002517701.1|/5.02009e-14/WD-repeat protein, putative [Ricinus communis]
Pbr008137.1	2136	84	25	7.44247	2.32819	-1.67657	Down	3.4431e-08	2.55232e-07	K13420|1|9e-59|226|sbi:SORBI_06g028760|LRR receptor-like serine/threonine-protein kinase FLS2 [EC:2.7.11.1]	-	GO:0004872//receptor activity;GO:0005488//binding;GO:0016740//transferase activity	GO:0006950//response to stress;GO:0009987//cellular process	gi|359482434|ref|XP_002270860.2|/1.61997e-161/PREDICTED: tyrosine-sulfated glycopeptide receptor 1-like [Vitis vinifera]
Pbr018661.1	2232	235	70	19.9257	6.23854	-1.67535	Down	2.0021e-20	3.1788e-19	K04079|1|0.0|1134|rcu:RCOM_1582180|molecular chaperone HtpG	GO:0044444//cytoplasmic part;GO:0016020//membrane;GO:0030312//external encapsulating structure	GO:0005515//protein binding;GO:0032559	GO:0006952//defense response;GO:0010035//response to inorganic substance;GO:0044267//cellular protein metabolic process	gi|255545176|ref|XP_002513649.1|/0/heat shock protein, putative [Ricinus communis]
Pbr008158.1	210	47	14	42.3563	13.2614	-1.67535	Down	4.0641e-05	0.000204094	-	-	-	-	-
Pbr025914.1	2580	47	14	3.4476	1.07941	-1.67535	Down	4.0641e-05	0.000204057	K01126|1|4e-21|102|smo:SELMODRAFT_108000|glycerophosphoryl diester phosphodiesterase [EC:3.1.4.46]	GO:0009536//plastid;GO:0005576//extracellular region;GO:0031225//anchored to membrane	GO:0016772//transferase activity, transferring phosphorus-containing groups;GO:0008081//phosphoric diester hydrolase activity	GO:0010383;GO:0009913//epidermal cell differentiation;GO:0019400;GO:0000904//cell morphogenesis involved in differentiation	gi|255576268|ref|XP_002529027.1|/0/glycerophosphoryl diester phosphodiesterase, putative [Ricinus communis]
Pbr022741.1	6624	94	28	2.68563	0.840847	-1.67535	Down	5.3001e-09	4.25457e-08	K00264|1|0.0|3621|rcu:RCOM_1579610|glutamate synthase (NADPH/NADH) [EC:1.4.1.13 1.4.1.14]	GO:0009532//plastid stroma	GO:0045181//glutamate synthase activity, NADH or NADPH as acceptor;GO:0051536//iron-sulfur cluster binding;GO:0046914//transition metal ion binding;GO:0000166//nucleotide binding;GO:0050662//coenzyme binding	GO:0010038//response to metal ion;GO:0040007//growth;GO:0006536//glutamate metabolic process	gi|359490794|ref|XP_002267865.2|/0/PREDICTED: glutamate synthase 1 [NADH], chloroplastic-like [Vitis vinifera]
Pbr003855.1	1101	958	286	164.671	51.6723	-1.67212	Down	4.22622e-78	2.18587e-76	K11982|1|3e-39|160|sbi:SORBI_01g035310|E3 ubiquitin-protein ligase RNF115/126 [EC:6.3.2.19]	-	-	-	gi|225434879|ref|XP_002283212.1|/1.19982e-105/PREDICTED: E3 ubiquitin-protein ligase RING1-like [Vitis vinifera]
Pbr036429.1	1425	144	43	19.1244	6.00251	-1.67177	Down	4.87456e-13	5.37422e-12	K01772|1|0.0|640|gmx:100813423|ferrochelatase [EC:4.99.1.1]	GO:0009536//plastid	GO:0016772//transferase activity, transferring phosphorus-containing groups;GO:0005488//binding;GO:0016829//lyase activity	GO:0006779//porphyrin-containing compound biosynthetic process;GO:0006351//transcription, DNA-dependent;GO:0006950//response to stress	gi|356506948|ref|XP_003522235.1|/0/PREDICTED: ferrochelatase-2, chloroplastic-like [Glycine max]
Pbr011255.1	750	444	133	112.037	35.2752	-1.66725	Down	5.79998e-37	1.523e-35	K12135|1|1e-06|51.6|ath:AT5G15840|zinc finger protein CONSTANS	GO:0044464//cell part	GO:0046914//transition metal ion binding;GO:0001071//nucleic acid binding transcription factor activity	GO:0006351//transcription, DNA-dependent	gi|302398755|gb|ADL36672.1|/1.36848e-71/COL domain class transcription factor [Malus x domestica]
Pbr010764.1	3018	90	27	5.64368	1.77961	-1.66508	Down	1.30361e-08	1.00566e-07	K13420|1|8e-75|280|pop:POPTR_1075175|LRR receptor-like serine/threonine-protein kinase FLS2 [EC:2.7.11.1]	-	-	-	gi|225466147|ref|XP_002270042.1|/0/PREDICTED: LRR receptor-like serine/threonine-protein kinase GSO1-like [Vitis vinifera]
Pbr001268.1	4137	1563	469	71.5011	22.551	-1.66477	Down	1.75511e-125	1.45684e-123	K09291|1|3e-23|109|mtr:MTR_2g063480|nucleoprotein TPR	GO:0016020//membrane	-	GO:0009725//response to hormone stimulus;GO:0010038//response to metal ion	gi|147862641|emb|CAN81488.1|/0/hypothetical protein VITISV_033286 [Vitis vinifera]
Pbr023412.1	900	163	49	34.2755	10.8301	-1.66213	Down	1.82029e-14	2.18988e-13	K08818|1|9e-10|62.4|vvi:100246062|cell division cycle 2-like [EC:2.7.11.22]	-	-	-	gi|255577489|ref|XP_002529623.1|/6.62355e-69/Remorin, putative [Ricinus communis]
Pbr007691.1	1236	103	31	15.7709	4.9891	-1.66042	Down	1.24051e-09	1.05372e-08	K00261|1|0.0|786|rcu:RCOM_1121650|glutamate dehydrogenase (NAD(P)+) [EC:1.4.1.3]	GO:0044429//mitochondrial part	GO:0046914//transition metal ion binding;GO:0016639//oxidoreductase activity, acting on the CH-NH2 group of donors, NAD or NADP as acceptor;GO:0032559	GO:0009642//response to light intensity;GO:0019752//carboxylic acid metabolic process;GO:0010038//response to metal ion;GO:0006970//response to osmotic stress	gi|255568914|ref|XP_002525427.1|/0/glutamate dehydrogenase, putative [Ricinus communis]
Pbr028315.1	1518	302	91	37.6508	11.9247	-1.65872	Down	1.78816e-25	3.40773e-24	K01580|1|0.0|820|gmx:100796475|glutamate decarboxylase [EC:4.1.1.15]	-	GO:0016831//carboxy-lyase activity;GO:0048037//cofactor binding;GO:0005515//protein binding	GO:0009064//glutamine family amino acid metabolic process	gi|356531096|ref|XP_003534114.1|/0/PREDICTED: glutamate decarboxylase-like [Glycine max]
Pbr012088.1	564	73	22	24.4953	7.75931	-1.65851	Down	3.41506e-07	2.26035e-06	-	GO:0034357;GO:0043234//protein complex	-	GO:0009767//photosynthetic electron transport chain	gi|225424301|ref|XP_002284666.1|/3.6292e-61/PREDICTED: uncharacterized protein LOC100259429 [Vitis vinifera]
Pbr042397.1	1065	136	41	24.1673	7.65797	-1.65802	Down	2.90182e-12	3.0409e-11	-	-	GO:0005488//binding	-	gi|255586867|ref|XP_002534043.1|/3.09822e-111/GATA transcription factor, putative [Ricinus communis]
Pbr009744.1	207	53	16	48.4557	15.3755	-1.65603	Down	1.50533e-05	8.03852e-05	-	-	-	-	-
Pbr029964.1	1134	397	120	66.2547	21.0498	-1.65422	Down	7.17026e-33	1.72067e-31	-	GO:0031090//organelle membrane;GO:0031981//nuclear lumen	-	-	gi|255542044|ref|XP_002512086.1|/8.27829e-158/SPFH domain-containing protein 2 precursor, putative [Ricinus communis]
Pbr028135.1	1176	43	13	6.91991	2.19895	-1.65394	Down	0.000102104	0.00047844	K15287|1|2e-141|500|rcu:RCOM_1266080|solute carrier family 35, member F1/2	GO:0043231//intracellular membrane-bounded organelle	-	-	gi|255579398|ref|XP_002530543.1|/2.14477e-140/conserved hypothetical protein [Ricinus communis]
Pbr026229.1	1554	215	65	26.1834	8.32035	-1.65394	Down	1.68304e-18	2.49659e-17	-	-	GO:0016787//hydrolase activity	-	gi|30685124|ref|NP_568307.3|/1.09942e-52/senescence-associated protein 101 [Arabidopsis thaliana]
Pbr003339.1	366	277	84	143.231	45.6539	-1.64954	Down	2.55008e-23	4.56657e-22	-	-	-	GO:0006950//response to stress	gi|357492995|ref|XP_003616786.1|/6.38178e-38/hypothetical protein MTR_5g084240 [Medicago truncatula]
Pbr004904.1	1260	56	17	8.41117	2.68385	-1.648	Down	9.17316e-06	5.05366e-05	K11159|1|9e-180|627|vvi:100232972|carotenoid cleavage dioxygenase	-	GO:0016701//oxidoreductase activity, acting on single donors with incorporation of molecular oxygen	-	gi|382929248|gb|AFG30025.1|/0/carotenoid cleavage dioxygenase 1, partial [Eriobotrya japonica]
Pbr025251.1	2154	46	14	4.04158	1.29289	-1.64432	Down	6.18974e-05	0.000301957	K06685|1|9e-19|94.0|ath:AT4G19050|maintenance of ploidy protein MOB1 (MPS1 binder 1)	-	-	-	gi|255578414|ref|XP_002530072.1|/1.0139e-86/leucine-rich repeat-containing protein, putative [Ricinus communis]
Pbr014541.1	549	92	28	31.7143	10.1453	-1.64432	Down	1.2118e-08	9.39873e-08	-	-	-	-	gi|224126399|ref|XP_002329544.1|/2.47264e-49/predicted protein [Populus trichocarpa]
Pbr024899.1	945	46	14	9.21224	2.94697	-1.64432	Down	6.18974e-05	0.000302011	K10704|1|3e-114|409|pop:POPTR_1097333|ubiquitin-conjugating enzyme E2 variant	GO:0009536//plastid	GO:0016705//oxidoreductase activity, acting on paired donors, with incorporation or reduction of molecular oxygen	GO:0006633//fatty acid biosynthetic process;GO:0009628//response to abiotic stimulus;GO:0006650//glycerophospholipid metabolic process	gi|224124328|ref|XP_002319304.1|/2.78632e-113/predicted protein [Populus trichocarpa]
Pbr029731.1	1536	105	32	12.9371	4.14418	-1.64236	Down	1.15326e-09	9.82972e-09	K14181|1|1e-135|481|vvi:100256880|valencene synthase [EC:4.2.3.73];K12929|2|4e-103|373|rcu:RCOM_1574190|casbene synthase [EC:4.2.3.8];K14184|5|8e-88|322|ath:AT5G23960|alpha-humulene/beta-caryophyllene synthase [EC:4.2.3.- 4.2.3.57]	-	-	-	gi|359493937|ref|XP_003634696.1|/3.05606e-156/PREDICTED: (-)-germacrene D synthase [Vitis vinifera]
Pbr027674.1	897	282	86	59.4971	19.0715	-1.6414	Down	1.47548e-23	2.66671e-22	-	-	-	-	gi|225440870|ref|XP_002276587.1|/2.77351e-59/PREDICTED: uncharacterized protein LOC100244210 [Vitis vinifera]
Pbr002909.1	189	154	47	154.205	49.467	-1.64031	Down	1.62087e-13	1.84281e-12	-	-	-	-	gi|147860974|emb|CAN82940.1|/6.73201e-19/hypothetical protein VITISV_013127 [Vitis vinifera]
Pbr029171.1	2250	95	29	7.99061	2.56386	-1.63999	Down	7.45244e-09	5.90765e-08	-	GO:0016020//membrane	GO:0005543//phospholipid binding	-	gi|255565087|ref|XP_002523536.1|/0/lipid binding protein, putative [Ricinus communis]
Pbr029567.1	1263	5315	1628	796.414	256.407	-1.63508	Down	0	0	K09503|1|8e-179|624|gmx:547558|DnaJ homolog subfamily A member 2	GO:0016020//membrane;GO:0044424//intracellular part	GO:0043169//cation binding;GO:0005515//protein binding;GO:0032559	GO:0006950//response to stress;GO:0044267//cellular protein metabolic process	gi|351724545|ref|NP_001238341.1|/8.36239e-178/seed maturation protein PM37 [Glycine max]
Pbr026827.1	2472	111	34	8.49794	2.73596	-1.63507	Down	4.37666e-10	3.86553e-09	K13417|1|5e-55|214|ath:AT2G13790|somatic embryogenesis receptor kinase 4 [EC:2.7.10.1 2.7.11.1];K13416|3|2e-54|213|ath:AT4G33430|brassinosteroid insensitive 1-associated receptor kinase 1 [EC:2.7.10.1 2.7.11.1]	-	GO:0004672//protein kinase activity;GO:0000166//nucleotide binding	GO:0009987//cellular process	gi|359485385|ref|XP_002274435.2|/0/PREDICTED: G-type lectin S-receptor-like serine/threonine-protein kinase At2g19130-like [Vitis vinifera]
Pbr038102.1	807	173	53	40.5706	13.0642	-1.63482	Down	6.04676e-15	7.50254e-14	K13237|1|2e-14|77.8|pop:POPTR_570603|peroxisomal 2,4-dienoyl-CoA reductase [EC:1.3.1.34];K00065|2|2e-13|74.7|rcu:RCOM_2018270|2-deoxy-D-gluconate 3-dehydrogenase [EC:1.1.1.125]	GO:0042579//microbody	GO:0003824//catalytic activity	GO:0008152//metabolic process	gi|167374779|gb|ABZ79222.1|/9.07727e-120/alcohol dehydrogenase [Prunus armeniaca]
Pbr002042.1	1455	62	19	8.06432	2.59759	-1.63438	Down	3.41418e-06	1.99867e-05	K09285|1|3e-136|483|vvi:100248718|AP2-like factor, ANT lineage	GO:0043231//intracellular membrane-bounded organelle	-	GO:0006351//transcription, DNA-dependent	gi|225441842|ref|XP_002284093.1|/2.7647e-135/PREDICTED: AP2-like ethylene-responsive transcription factor At2g41710-like [Vitis vinifera]
Pbr006821.1	2349	2235	686	180.067	58.0926	-1.63211	Down	1.14465e-173	1.27589e-171	K15400|1|2e-64|246|rcu:RCOM_1447050|omega-hydroxypalmitate O-feruloyl transferase [EC:2.3.1.188]	-	GO:0016740//transferase activity	-	gi|41323261|gb|AAR99826.1|/0/alcohol acyl transferase [Malus x domestica]
Pbr005851.1	1461	267	82	34.586	11.1646	-1.63126	Down	3.34672e-22	5.74093e-21	K13811|1|0.0|754|vvi:100252345|3'-phosphoadenosine 5'-phosphosulfate synthase [EC:2.7.7.4 2.7.1.25]	GO:0009536//plastid	GO:0004779//sulfate adenylyltransferase activity	GO:0006790//sulfur compound metabolic process	gi|225458024|ref|XP_002276993.1|/0/PREDICTED: ATP sulfurylase 2 [Vitis vinifera]
Pbr041506.1	2673	660	203	46.7287	15.1069	-1.6291	Down	1.98053e-52	7.12598e-51	K06889|1|2e-86|319|vvi:100245712|;K12813|2|2e-11|70.1|mtr:MTR_6g061840|pre-mRNA-splicing factor ATP-dependent RNA helicase DHX16 [EC:3.6.4.13]	GO:0043231//intracellular membrane-bounded organelle	GO:0046914//transition metal ion binding;GO:0042393//histone binding	GO:0006351//transcription, DNA-dependent	gi|302398553|gb|ADL36571.1|/1.46804e-122/ALF domain class transcription factor [Malus x domestica]
Pbr007589.1	1326	52	16	7.42162	2.40025	-1.62855	Down	2.28298e-05	0.000118913	K14432|1|6e-118|422|gmx:100790948|ABA responsive element binding factor	-	GO:0003676//nucleic acid binding	GO:0009725//response to hormone stimulus;GO:0009845//seed germination;GO:0009628//response to abiotic stimulus;GO:0006355//regulation of transcription, DNA-dependent;GO:0009743//response to carbohydrate stimulus;GO:0006950//response to stress	gi|302746499|gb|ADL62859.1|/1.21017e-150/abscisic acid insensitive [Prunus armeniaca]
Pbr021772.1	1887	65	20	6.51899	2.10832	-1.62855	Down	2.08506e-06	1.25864e-05	K15631|1|1e-17|90.1|ath:AT1G16540|molybdenum cofactor sulfurtransferase [EC:2.8.1.9]	-	-	-	gi|225426751|ref|XP_002275855.1|/0/PREDICTED: uncharacterized protein LOC100265017 [Vitis vinifera]
Pbr007961.1	1494	65	20	8.23383	2.66292	-1.62855	Down	2.08506e-06	1.25892e-05	K08341|1|1e-20|99.8|zma:100240695|GABA(A) receptor-associated protein (autophagy-related protein 8)	GO:0044464//cell part	-	-	gi|255572411|ref|XP_002527143.1|/1.30423e-87/conserved hypothetical protein [Ricinus communis]
Pbr013656.1	660	188	58	53.908	17.4809	-1.62472	Down	5.4879e-16	7.20871e-15	K03239|1|4e-18|89.4|ath:AT1G53880|translation initiation factor eIF-2B subunit alpha	-	-	-	gi|225439060|ref|XP_002266077.1|/1.11528e-76/PREDICTED: protein LURP-one-related 8 [Vitis vinifera]
Pbr038124.1	393	301	93	144.948	47.0728	-1.62257	Down	1.1737e-24	2.18194e-23	-	GO:0016020//membrane	GO:0016671//oxidoreductase activity, acting on a sulfur group of donors, disulfide as acceptor	GO:0008152//metabolic process	gi|225431343|ref|XP_002278070.1|/2.58004e-55/PREDICTED: uncharacterized protein At4g08330, chloroplastic [Vitis vinifera]
Pbr026564.1	663	563	174	160.707	52.2054	-1.62216	Down	1.04189e-44	3.28176e-43	-	GO:0009536//plastid	GO:0046914//transition metal ion binding;GO:0051540	GO:0031163;GO:0009657//plastid organization	gi|255576215|ref|XP_002529001.1|/5.98617e-70/Nitrogen fixation protein nifU, putative [Ricinus communis]
Pbr010137.1	1992	165	51	15.6759	5.09284	-1.62201	Down	3.55326e-14	4.20798e-13	-	GO:0016020//membrane	GO:0005543//phospholipid binding	GO:0008361//regulation of cell size;GO:0009415//response to water stimulus;GO:0033554//cellular response to stress;GO:0010941//regulation of cell death;GO:0006968//cellular defense response	gi|356527466|ref|XP_003532331.1|/0/PREDICTED: protein BONZAI 1-like [Glycine max]
Pbr003977.1	1164	569	176	92.5121	30.0773	-1.62097	Down	4.02894e-45	1.29595e-43	K00869|1|4e-163|572|rcu:RCOM_0573350|mevalonate kinase [EC:2.7.1.36]	GO:0044424//intracellular part	GO:0016301//kinase activity;GO:0032559	GO:0006720//isoprenoid metabolic process;GO:0006796//phosphate-containing compound metabolic process	gi|255577554|ref|XP_002529655.1|/4.40941e-162/mevalonate kinase, putative [Ricinus communis]
Pbr025876.1	4302	42	13	1.84764	0.601108	-1.61999	Down	0.000155175	0.00070452	K05681|1|7e-43|175|cme:CMS467C|ATP-binding cassette, subfamily G (WHITE), member 2;K12843|5|3e-36|153|vvi:100248403|U4/U6 small nuclear ribonucleoprotein PRP3	GO:0044464//cell part	GO:0017111//nucleoside-triphosphatase activity;GO:0015604//organic phosphonate transmembrane transporter activity;GO:0032559	GO:0009207	gi|255543331|ref|XP_002512728.1|/0/ATP-binding cassette transporter, putative [Ricinus communis]
Pbr039092.1	876	523	162	112.989	36.7867	-1.61893	Down	1.54913e-41	4.53433e-40	K10661|1|2e-09|61.2|mtr:MTR_4g085550|E3 ubiquitin-protein ligase MARCH6 [EC:6.3.2.19]	-	-	-	gi|356499805|ref|XP_003518727.1|/1.98114e-78/PREDICTED: uncharacterized protein LOC100779674 [Glycine max]
Pbr006526.1	825	213	66	48.8613	15.9136	-1.61843	Down	7.91248e-18	1.13667e-16	K09286|1|9e-17|85.5|vvi:100248027|EREBP-like factor	-	-	-	gi|292668911|gb|ADE41110.1|/4.48195e-122/AP2 domain class transcription factor [Malus x domestica]
Pbr007792.1	516	2749	852	1008.24	328.45	-1.61809	Down	1.5076e-210	2.14432e-208	-	GO:0009526//plastid envelope;GO:0009534//chloroplast thylakoid;GO:0009522//photosystem I;GO:0000229	-	GO:0009725//response to hormone stimulus;GO:0009767//photosynthetic electron transport chain	gi|224128069|ref|XP_002320236.1|/3.30815e-49/predicted protein [Populus trichocarpa]
Pbr033156.1	831	884	274	201.322	65.5887	-1.61798	Down	5.71664e-69	2.56769e-67	-	-	-	-	gi|38679321|gb|AAR26482.1|/7.51904e-109/harpin binding protein 1 [Malus x domestica]
Pbr010964.1	852	2725	845	605.293	197.286	-1.61735	Down	1.36944e-208	1.91785e-206	-	-	-	-	gi|255559597|ref|XP_002520818.1|/7.71835e-56/conserved hypothetical protein [Ricinus communis]
Pbr032364.1	1860	889	276	90.454	29.5172	-1.61563	Down	3.30022e-69	1.48722e-67	K03283|1|0.0|999|vvi:100253562|heat shock 70kDa protein 1/8	-	GO:0016628//oxidoreductase activity, acting on the CH-CH group of donors, NAD or NADP as acceptor;GO:0032559	GO:0008152//metabolic process;GO:0050896//response to stimulus	gi|6969976|gb|AAF34134.1|/0/high molecular weight heat shock protein [Malus x domestica]
Pbr042245.1	681	74	23	20.5648	6.71831	-1.614	Down	4.76664e-07	3.10229e-06	-	GO:0043231//intracellular membrane-bounded organelle	GO:0005488//binding;GO:0008026//ATP-dependent helicase activity	GO:0006259//DNA metabolic process	gi|255541316|ref|XP_002511722.1|/2.56141e-87/conserved hypothetical protein [Ricinus communis]
Pbr038107.1	1638	1393	433	160.945	52.584	-1.61387	Down	3.009e-107	2.16815e-105	K15015|1|6e-11|67.4|cre:CHLREDRAFT_196429|solute carrier family 32 (vesicular inhibitory amino acid transporter);K13946|2|4e-10|64.7|ppp:PHYPADRAFT_148519|auxin influx carrier (AUX1 LAX family)	GO:0031224//intrinsic to membrane	-	-	gi|297744933|emb|CBI38472.3|/0/unnamed protein product [Vitis vinifera]
Pbr004885.1	963	669	208	131.474	42.9652	-1.61354	Down	2.03778e-52	7.32233e-51	K13424|1|7e-17|86.3|pop:POPTR_663578|WRKY transcription factor 33	-	-	-	gi|315272008|gb|ADU02585.1|/2.14086e-92/WRKY transcription factor 4 [Vitis vinifera]
Pbr033995.1	522	119	37	43.1435	14.0997	-1.61348	Down	1.53657e-10	1.4086e-09	-	-	-	-	gi|302398667|gb|ADL36628.1|/4.59589e-70/C2H2L domain class transcription factor [Malus x domestica]
Pbr029765.1	3744	318	99	16.0742	5.25991	-1.61164	Down	1.00015e-25	1.92754e-24	K03013|1|4e-150|531|vvi:100258335|DNA-directed RNA polymerases I, II, and III subunit RPABC1;K13457|3|2e-58|226|vvi:100252764|disease resistance protein RPM1	-	-	-	gi|105922499|gb|ABF81420.1|/0/NBS type disease resistance protein [Populus trichocarpa]
Pbr009371.1	402	266	83	125.226	41.0706	-1.60836	Down	1.03576e-21	1.74066e-20	K01051|1|7e-08|53.9|ath:AT3G29090|pectinesterase [EC:3.1.1.11]	-	-	-	gi|356569272|ref|XP_003552827.1|/1.23489e-25/PREDICTED: wound-induced protein 1-like [Glycine max]
Pbr019261.1	2241	272	85	22.9703	7.54495	-1.60618	Down	3.97932e-22	6.80045e-21	-	GO:0005622//intracellular	-	-	gi|255586913|ref|XP_002534059.1|/7.50224e-141/60S ribosomal protein L34, putative [Ricinus communis]
Pbr004448.1	603	275	86	86.3087	28.3701	-1.60514	Down	2.46658e-22	4.25789e-21	-	-	-	-	gi|255573042|ref|XP_002527451.1|/1.317e-46/conserved hypothetical protein [Ricinus communis]
Pbr035962.1	1680	83	26	9.34992	3.07853	-1.60271	Down	1.09488e-07	7.71612e-07	K00423|1|3e-65|248|rcu:RCOM_0657480|L-ascorbate oxidase [EC:1.10.3.3]	GO:0005576//extracellular region	GO:0046914//transition metal ion binding;GO:0016682//oxidoreductase activity, acting on diphenols and related substances as donors, oxygen as acceptor	GO:0009808//lignin metabolic process;GO:0009832//plant-type cell wall biogenesis	gi|224139028|ref|XP_002322962.1|/0/laccase 1b [Populus trichocarpa]
Pbr013228.1	2370	67	21	5.35014	1.76259	-1.60188	Down	1.91808e-06	1.16376e-05	-	GO:0031224//intrinsic to membrane	GO:0004871//signal transducer activity	GO:0009267//cellular response to starvation;GO:0015698//inorganic anion transport	gi|359473015|ref|XP_003631230.1|/0/PREDICTED: phosphate transporter PHO1 homolog 1 isoform 2 [Vitis vinifera]
Pbr038423.1	1713	2852	894	315.088	103.815	-1.60174	Down	3.2514e-215	4.82568e-213	K13448|1|5e-09|61.2|aly:ARALYDRAFT_908301|calcium-binding protein CML;K13210|4|2e-07|56.2|zma:100279814|far upstream element-binding protein	-	-	-	gi|225452887|ref|XP_002283932.1|/3.94532e-91/PREDICTED: uncharacterized protein At5g39570 [Vitis vinifera]
Pbr024238.1	3120	319	100	19.3497	6.37565	-1.60167	Down	1.37877e-25	2.63492e-24	K01537|1|0.0|1454|vvi:100241741|Ca2+-transporting ATPase [EC:3.6.3.8]	GO:0000325//plant-type vacuole;GO:0031224//intrinsic to membrane;GO:0031090//organelle membrane;GO:0009534//chloroplast thylakoid	GO:0046914//transition metal ion binding;GO:0005515//protein binding;GO:0019829//cation-transporting ATPase activity;GO:0046873//metal ion transmembrane transporter activity;GO:0032559;GO:0016836//hydro-lyase activity	GO:0012501//programmed cell death;GO:0051707//response to other organism;GO:0006816//calcium ion transport;GO:0050801//ion homeostasis;GO:0006970//response to osmotic stress;GO:0009206;GO:0006952//defense response	gi|225441902|ref|XP_002284422.1|/0/PREDICTED: calcium-transporting ATPase 4, plasma membrane-type isoform 2 [Vitis vinifera]
Pbr027568.1	3882	252	79	12.2853	4.0481	-1.60161	Down	1.56221e-20	2.49634e-19	K03593|1|1e-35|150|rcu:RCOM_0992740|ATP-binding protein involved in chromosome partitioning	GO:0009536//plastid	-	-	gi|255549052|ref|XP_002515582.1|/0/conserved hypothetical protein [Ricinus communis]
Pbr000312.1	4170	1559	489	70.7537	23.3266	-1.60083	Down	1.96975e-118	1.5962e-116	K15711|1|5e-85|315|smo:SELMODRAFT_40849|SWI/SNF-related matrix-associated actin-dependent regulator of chromatin subfamily A3 [EC:3.6.4.- 6.3.2.19];K15505|2|9e-85|314|ppp:PHYPADRAFT_105578|DNA repair protein RAD5 [EC:3.6.4.-]	-	GO:0046872//metal ion binding;GO:0003676//nucleic acid binding	GO:0048229//gametophyte development	gi|359494872|ref|XP_002263027.2|/0/PREDICTED: uncharacterized protein LOC100265351 [Vitis vinifera]
Pbr028074.1	3303	102	32	5.84428	1.92717	-1.60054	Down	3.90682e-09	3.18007e-08	K09313|1|2e-10|66.6|gmx:100780863|homeobox protein cut-like;K06674|2|4e-08|59.3|ath:AT3G47460|structural maintenance of chromosome 2;K10696|3|4e-07|55.8|osa:4349420|E3 ubiquitin-protein ligase BRE1 [EC:6.3.2.19];K10395|4|4e-07|55.8|pop:POPTR_279914|kinesin family member 4/7/21/27	GO:0016020//membrane	-	-	gi|147790037|emb|CAN60525.1|/0/hypothetical protein VITISV_000522 [Vitis vinifera]
Pbr008624.1	372	51	16	25.9458	8.55572	-1.60054	Down	3.4486e-05	0.000175215	-	-	-	-	gi|255548327|ref|XP_002515220.1|/6.37973e-14/conserved hypothetical protein [Ricinus communis]
Pbr012647.1	1725	1294	406	141.966	46.8184	-1.6004	Down	1.39595e-98	9.2082e-97	K00666|1|2e-149|527|sbi:SORBI_10g012080|fatty-acyl-CoA synthase [EC:6.2.1.-];K01904|3|4e-46|184|ath:AT3G21240|4-coumarate--CoA ligase [EC:6.2.1.12]	-	GO:0003824//catalytic activity	-	gi|225466273|ref|XP_002272437.1|/0/PREDICTED: medium-chain-fatty-acid--CoA ligase [Vitis vinifera]
Pbr000538.1	1263	580	182	86.9088	28.6647	-1.60023	Down	3.7898e-45	1.22191e-43	-	-	GO:0003677//DNA binding	GO:0006351//transcription, DNA-dependent;GO:0009743//response to carbohydrate stimulus	gi|302398869|gb|ADL36729.1|/0/HSF domain class transcription factor [Malus x domestica]
Pbr001520.1	1083	592	186	103.45	34.1636	-1.59841	Down	5.65106e-46	1.84378e-44	K09422|1|1e-102|371|vvi:100245492|myb proto-oncogene protein, plant	-	-	GO:0009725//response to hormone stimulus;GO:0006970//response to osmotic stress	gi|302398945|gb|ADL36767.1|/1.11248e-164/MYB domain class transcription factor [Malus x domestica]
Pbr003188.1	435	5822	1833	2532.92	838.209	-1.59542	Down	0	0	K02639|1|1e-49|192|vvi:100249080|ferredoxin	GO:0009532//plastid stroma	GO:0051536//iron-sulfur cluster binding	GO:0009314//response to radiation;GO:0022900//electron transport chain	gi|338173755|gb|AEI83424.1|/1.09866e-50/chloroplast ferredoxin I [Camellia sinensis]
Pbr026234.1	1785	2550	803	270.359	89.4863	-1.59514	Down	1.67375e-191	2.09672e-189	-	-	GO:0016788//hydrolase activity, acting on ester bonds	-	gi|356573402|ref|XP_003554850.1|/7.04592e-115/PREDICTED: uncharacterized protein LOC100797620 [Glycine max]
Pbr019816.2	1017	4037	1274	751.237	249.188	-1.59203	Down	3.879e-301	8.75468e-299	-	-	-	-	gi|356514569|ref|XP_003525978.1|/1.37942e-36/PREDICTED: uncharacterized protein LOC100790617 [Glycine max]
Pbr023807.1	498	2091	660	794.628	263.629	-1.59177	Down	6.5125e-157	6.66104e-155	-	-	GO:0005488//binding	-	gi|224106053|ref|XP_002314027.1|/2.02773e-53/predicted protein [Populus trichocarpa]
Pbr010588.1	3126	117	37	7.08331	2.35446	-1.58902	Down	3.43754e-10	3.06984e-09	K14510|1|9e-39|160|ppp:PHYPADRAFT_30352|serine/threonine-protein kinase CTR1 [EC:2.7.11.1]	-	GO:0004672//protein kinase activity;GO:0000166//nucleotide binding	-	gi|359484396|ref|XP_002281836.2|/0/PREDICTED: uncharacterized protein LOC100267909 [Vitis vinifera]
Pbr029614.1	1776	1109	351	118.176	39.3137	-1.58783	Down	8.26288e-84	4.6526e-82	K14508|1|6e-104|376|vvi:100250996|regulatory protein NPR1	-	-	-	gi|224062625|ref|XP_002300863.1|/0/NPR1/NIM1-like regulatory protein [Populus trichocarpa]
Pbr024012.1	786	101	32	24.3186	8.09854	-1.58632	Down	5.84222e-09	4.67326e-08	K00861|1|8e-10|62.4|bdi:100832727|riboflavin kinase [EC:2.7.1.26]	GO:0009526//plastid envelope;GO:0009532//plastid stroma	GO:0016788//hydrolase activity, acting on ester bonds	GO:0006259//DNA metabolic process	gi|255540407|ref|XP_002511268.1|/1.47854e-111/2-deoxyglucose-6-phosphate phosphatase, putative [Ricinus communis]
Pbr035932.1	1236	852	270	130.455	43.4535	-1.58601	Down	1.07046e-64	4.53931e-63	K03841|1|0.0|639|rcu:RCOM_0086620|fructose-1,6-bisphosphatase I [EC:3.1.3.11]	GO:0009532//plastid stroma;GO:0009526//plastid envelope;GO:0005576//extracellular region	GO:0043169//cation binding;GO:0016628//oxidoreductase activity, acting on the CH-CH group of donors, NAD or NADP as acceptor;GO:0019203//carbohydrate phosphatase activity	GO:0005984//disaccharide metabolic process;GO:0009767//photosynthetic electron transport chain;GO:0015977//carbon fixation;GO:0006000//fructose metabolic process;GO:0006950//response to stress	gi|255573935|ref|XP_002527886.1|/0/fructose-1,6-bisphosphatase, putative [Ricinus communis]
Pbr020387.1	363	63	20	32.8453	10.9598	-1.58346	Down	4.7207e-06	2.71463e-05	-	GO:0005576//extracellular region;GO:0005618//cell wall	-	GO:0007154//cell communication;GO:0023052//signaling	gi|255542726|ref|XP_002512426.1|/7.08147e-37/RALFL33, putative [Ricinus communis]
Pbr004162.1	930	258	82	52.502	17.5392	-1.58179	Down	1.22284e-20	1.96324e-19	K10704|1|3e-114|409|pop:POPTR_1097333|ubiquitin-conjugating enzyme E2 variant	GO:0009536//plastid	GO:0016705//oxidoreductase activity, acting on paired donors, with incorporation or reduction of molecular oxygen	GO:0006633//fatty acid biosynthetic process;GO:0009628//response to abiotic stimulus;GO:0006650//glycerophospholipid metabolic process	gi|224124328|ref|XP_002319304.1|/2.71376e-113/predicted protein [Populus trichocarpa]
Pbr036868.2	468	88	28	35.5857	11.9012	-1.58019	Down	6.15622e-08	4.44762e-07	-	GO:0016020//membrane	-	GO:0009725//response to hormone stimulus;GO:0006972//hyperosmotic response;GO:0009791//post-embryonic development;GO:0048229//gametophyte development;GO:0006914//autophagy	gi|224134018|ref|XP_002321716.1|/5.98756e-51/predicted protein [Populus trichocarpa]
Pbr003844.1	1575	336	107	40.3736	13.514	-1.57896	Down	2.37326e-26	4.70671e-25	-	GO:0009526//plastid envelope;GO:0009534//chloroplast thylakoid;GO:0000229	-	-	gi|118486499|gb|ABK95089.1|/2.75507e-168/unknown [Populus trichocarpa]
Pbr006229.1	270	91	29	63.7847	21.3655	-1.57793	Down	3.77414e-08	2.78864e-07	K10046|1|2e-09|58.9|gmx:100780764|GDP-D-mannose 3', 5'-epimerase [EC:5.1.3.18 5.1.3.-]	-	GO:0048037//cofactor binding;GO:0016857//racemase and epimerase activity, acting on carbohydrates and derivatives	GO:0008152//metabolic process	gi|225380888|gb|ACN88685.1|/4.78827e-09/GDP-D-mannose-3',5'-epimerase [Malus x domestica]
Pbr036461.1	858	819	261	180.649	60.5108	-1.57793	Down	8.20236e-62	3.35327e-60	-	GO:0016020//membrane	GO:0048037//cofactor binding	GO:0008152//metabolic process	gi|225430578|ref|XP_002263819.1|/1.06778e-129/PREDICTED: uncharacterized protein At1g32220, chloroplastic [Vitis vinifera]
Pbr025086.1	2466	2412	769	185.107	62.0315	-1.57729	Down	2.40814e-178	2.75163e-176	K13457|1|4e-20|98.6|sbi:SORBI_10g028730|disease resistance protein RPM1;K13460|4|1e-15|83.6|ath:AT1G12220|disease resistance protein RPS5	-	-	-	gi|359480461|ref|XP_002268207.2|/0/PREDICTED: probable disease resistance protein At5g66900-like [Vitis vinifera]
Pbr024864.1	804	5594	1787	1316.76	442.128	-1.57445	Down	0	0	-	GO:0043231//intracellular membrane-bounded organelle	GO:0001071//nucleic acid binding transcription factor activity	GO:0009725//response to hormone stimulus;GO:0006950//response to stress;GO:0010467//gene expression	gi|302399005|gb|ADL36797.1|/2.02256e-95/NAC domain class transcription factor [Malus x domestica]
Pbr008682.1	2100	4588	1466	413.469	138.865	-1.57409	Down	0	0	K04079|1|0.0|1116|gmx:100819568|molecular chaperone HtpG	GO:0043231//intracellular membrane-bounded organelle;GO:0030312//external encapsulating structure;GO:0044444//cytoplasmic part	GO:0017111//nucleoside-triphosphatase activity;GO:0005515//protein binding;GO:0032559	GO:0048827//phyllome development;GO:0044267//cellular protein metabolic process;GO:0042742//defense response to bacterium;GO:0009408//response to heat;GO:0009207;GO:0031647//regulation of protein stability;GO:0006970//response to osmotic stress;GO:0009791//post-embryonic development	gi|358248990|ref|NP_001240230.1|/0/uncharacterized protein LOC100819568 [Glycine max]
Pbr003786.1	2181	50	16	4.33864	1.4593	-1.57197	Down	5.18798e-05	0.000256618	K06694|1|9e-06|50.8|mtr:MTR_5g043640|26S proteasome non-ATPase regulatory subunit 10	-	-	-	gi|359483665|ref|XP_003632996.1|/0/PREDICTED: ankyrin repeat-containing protein At3g12360-like [Vitis vinifera]
Pbr014617.1	2001	353	113	33.3862	11.2334	-1.57146	Down	1.99771e-27	4.11739e-26	K14431|1|4e-10|65.1|aly:ARALYDRAFT_311885|transcription factor TGA;K09561|2|8e-06|50.8|vcn:VOLCADRAFT_67840|STIP1 homology and U-box containing protein 1 [EC:6.3.2.19]	GO:0044424//intracellular part	GO:0016874//ligase activity	GO:0009743//response to carbohydrate stimulus	gi|224087845|ref|XP_002308247.1|/0/predicted protein [Populus trichocarpa]
Pbr012902.1	3549	1771	567	94.4391	31.7802	-1.57126	Down	9.53426e-131	8.23959e-129	K01537|1|0.0|1270|ath:AT3G63380|Ca2+-transporting ATPase [EC:3.6.3.8]	GO:0031224//intrinsic to membrane	GO:0046873//metal ion transmembrane transporter activity;GO:0019829//cation-transporting ATPase activity;GO:0005515//protein binding;GO:0032559	GO:0009206;GO:0006816//calcium ion transport	gi|225437164|ref|XP_002274787.1|/0/PREDICTED: calcium-transporting ATPase 12, plasma membrane-type-like [Vitis vinifera]
Pbr018716.1	447	156	50	66.0475	22.2506	-1.56966	Down	6.34464e-13	6.93618e-12	K06689|1|3e-85|311|pop:POPTR_586577|ubiquitin-conjugating enzyme E2 D/E [EC:6.3.2.19]	-	GO:0019899//enzyme binding;GO:0019787//small conjugating protein ligase activity;GO:0032559	GO:0019941//modification-dependent protein catabolic process;GO:0032446//protein modification by small protein conjugation	gi|353259717|gb|AEQ75497.1|/1.59309e-84/ubiquitin-conjugating enzyme [Rosa multiflora]
Pbr011883.1	510	290	93	107.614	36.2737	-1.56886	Down	9.3227e-23	1.63201e-21	K01802|1|6e-16|81.6|osa:4341766|peptidylprolyl isomerase [EC:5.2.1.8];K09569|5|2e-06|50.1|bdi:100837933|FK506-binding protein 2 [EC:5.2.1.8]	GO:0009534//chloroplast thylakoid	GO:0016859//cis-trans isomerase activity;GO:0005527//macrolide binding	GO:0044267//cellular protein metabolic process	gi|224081186|ref|XP_002306326.1|/6.44674e-42/predicted protein [Populus trichocarpa]
Pbr016011.2	1956	374	120	36.1861	12.2037	-1.56812	Down	7.03512e-29	1.50566e-27	-	-	-	GO:0012501//programmed cell death	gi|225453378|ref|XP_002271102.1|/1.36177e-175/PREDICTED: GRAM domain-containing protein 1A [Vitis vinifera]
Pbr000023.1	519	274	88	99.9131	33.7283	-1.56671	Down	1.51669e-21	2.53329e-20	K08065|1|2e-37|153|gmx:100813169|nuclear transcription Y subunit beta;K02326|4|4e-07|52.4|smo:SELMODRAFT_115079|DNA polymerase epsilon subunit 3 [EC:2.7.7.7]	GO:0043231//intracellular membrane-bounded organelle	GO:0003677//DNA binding	GO:0006351//transcription, DNA-dependent	gi|351726200|ref|NP_001238398.1|/1.23896e-43/uncharacterized protein LOC100305641 [Glycine max]
Pbr028593.1	1494	165	53	20.9013	7.05675	-1.56651	Down	1.49005e-13	1.69903e-12	K02366|1|3e-06|51.6|smo:SELMODRAFT_24030|glucuronyl/N-acetylglucosaminyl transferase EXT1 [EC:2.4.1.224 2.4.1.225]	GO:0016020//membrane	GO:0016757//transferase activity, transferring glycosyl groups	-	gi|359484716|ref|XP_002263848.2|/1.23716e-154/PREDICTED: probable glycosyltransferase At5g20260-like [Vitis vinifera]
Pbr005985.1	165	258	83	295.92	100.063	-1.5643	Down	2.47128e-20	3.91009e-19	-	GO:0031224//intrinsic to membrane	-	GO:0009725//response to hormone stimulus;GO:0006972//hyperosmotic response	gi|197309258|gb|ACH60980.1|/1.2938e-14/rare cold inducible protein [Pseudotsuga menziesii]
Pbr019918.1	2652	87	28	6.20847	2.10022	-1.5637	Down	9.18518e-08	6.51527e-07	K01179|1|0.0|686|ath:AT3G43860|endoglucanase [EC:3.2.1.4]	GO:0031410//cytoplasmic vesicle	GO:0004553//hydrolase activity, hydrolyzing O-glycosyl compounds	GO:0044238//primary metabolic process	gi|359475982|ref|XP_002280120.2|/0/PREDICTED: endoglucanase 16-like [Vitis vinifera]
Pbr025176.1	477	149	48	59.1163	20.0171	-1.56232	Down	2.47756e-12	2.6033e-11	K09286|1|1e-52|203|pop:POPTR_655111|EREBP-like factor	GO:0043231//intracellular membrane-bounded organelle	GO:0003676//nucleic acid binding;GO:0001071//nucleic acid binding transcription factor activity	GO:0006351//transcription, DNA-dependent	gi|292668967|gb|ADE41138.1|/5.20353e-77/AP2 domain class transcription factor [Malus x domestica]
Pbr002057.1	1689	62	20	6.94706	2.35548	-1.56038	Down	7.06696e-06	3.95718e-05	K00006|1|6e-13|74.3|bdi:100833474|glycerol-3-phosphate dehydrogenase (NAD+) [EC:1.1.1.8]	GO:0043234//protein complex;GO:0044444//cytoplasmic part	GO:0016616//oxidoreductase activity, acting on the CH-OH group of donors, NAD or NADP as acceptor;GO:0048037//cofactor binding;GO:0000166//nucleotide binding	GO:0006072//glycerol-3-phosphate metabolic process	gi|356537481|ref|XP_003537255.1|/0/PREDICTED: glycerol-3-phosphate dehydrogenase 1 [NAD(P)+]-like [Glycine max]
Pbr014995.1	2061	530	171	48.6673	16.5043	-1.56011	Down	5.79068e-40	1.63029e-38	-	-	-	-	gi|385282638|gb|AFI57906.1|/0/alkaline/neutral invertase C [Prunus persica]
Pbr039386.2	4797	158	51	6.23342	2.11485	-1.55947	Down	5.80898e-13	6.37098e-12	K06685|1|3e-13|77.0|ath:AT4G19050|maintenance of ploidy protein MOB1 (MPS1 binder 1)	-	-	-	gi|224104273|ref|XP_002333965.1|/1.4258e-126/tir-nbs-lrr resistance protein [Populus trichocarpa]
Pbr002372.1	885	384	124	82.1159	27.8713	-1.55888	Down	2.2759e-29	4.94451e-28	-	-	-	-	gi|225446795|ref|XP_002283251.1|/3.50731e-91/PREDICTED: NAC domain-containing protein 42 [Vitis vinifera]
Pbr025157.1	1053	65	21	11.6822	3.96707	-1.55816	Down	4.30444e-06	2.48362e-05	K13414|1|6e-33|139|aly:ARALYDRAFT_489755|mitogen-activated protein kinase kinase kinase 1, plant [EC:2.7.11.25];K11228|3|4e-32|137|ota:Ot13g01170|mitogen-activated protein kinase kinase kinase [EC:2.7.11.1]	-	GO:0004672//protein kinase activity;GO:0000166//nucleotide binding	GO:0009987//cellular process;GO:0044238//primary metabolic process;GO:0003006//developmental process involved in reproduction	gi|356541799|ref|XP_003539360.1|/1.29306e-101/PREDICTED: mitogen-activated protein kinase kinase kinase 3-like [Glycine max]
Pbr000582.1	3393	99	32	5.52192	1.87605	-1.55747	Down	1.29773e-08	1.00168e-07	K12123|1|0.0|1725|rcu:RCOM_0634650|phytochrome E;K12121|3|0.0|1471|vvi:100261882|phytochrome B	GO:0044464//cell part	GO:0004673//protein histidine kinase activity;GO:0004930//G-protein coupled receptor activity;GO:0042802//identical protein binding;GO:0032559	GO:0006468//protein phosphorylation;GO:0007602//phototransduction;GO:0006351//transcription, DNA-dependent	gi|255557437|ref|XP_002519749.1|/0/phytochrome B, putative [Ricinus communis]
Pbr005379.1	1311	538	174	77.6638	26.4013	-1.55663	Down	2.04514e-40	5.81778e-39	-	-	GO:0003676//nucleic acid binding	GO:0006351//transcription, DNA-dependent	gi|302398871|gb|ADL36730.1|/0/HSF domain class transcription factor [Malus x domestica]
Pbr023040.1	1608	3189	1033	375.325	127.789	-1.55438	Down	3.13608e-230	5.00837e-228	K08176|1|0.0|808|rcu:RCOM_1006970|MFS transporter, PHS family, inorganic phosphate transporter	GO:0031224//intrinsic to membrane	GO:0015291//secondary active transmembrane transporter activity	GO:0015698//inorganic anion transport	gi|12697486|emb|CAC28219.1|/0/phosphate transporter [Sesbania rostrata]
Pbr028081.1	1515	108	35	13.4912	4.59552	-1.55372	Down	3.0028e-09	2.46998e-08	K09060|1|2e-08|58.9|gmx:778124|plant G-box-binding factor	GO:0043231//intracellular membrane-bounded organelle	GO:0003677//DNA binding;GO:0001071//nucleic acid binding transcription factor activity;GO:0005515//protein binding	GO:0006351//transcription, DNA-dependent	gi|225427794|ref|XP_002269363.1|/1.40671e-121/PREDICTED: uncharacterized protein LOC100255631 [Vitis vinifera]
Pbr018921.1	2139	111	36	9.8209	3.34789	-1.5526	Down	1.84472e-09	1.5477e-08	K14494|1|7e-46|184|pop:POPTR_645273|DELLA protein	-	-	-	gi|302399055|gb|ADL36822.1|/0/SCL domain class transcription factor [Malus x domestica]
Pbr042756.1	747	154	50	39.0157	13.3146	-1.55104	Down	1.39623e-12	1.49352e-11	-	-	GO:0005488//binding	-	gi|225429696|ref|XP_002281841.1|/1.69931e-29/PREDICTED: uncharacterized protein LOC100260963 [Vitis vinifera]
Pbr007550.1	1806	157	51	16.4521	5.61735	-1.55031	Down	8.60888e-13	9.32566e-12	K14487|1|0.0|1025|vvi:100250741|auxin responsive GH3 gene family	-	GO:0016881//acid-amino acid ligase activity	GO:0009725//response to hormone stimulus;GO:0048878//chemical homeostasis	gi|300680024|gb|ADK27716.1|/0/GH3 [Dimocarpus longan]
Pbr028023.1	1410	123	40	16.5092	5.64313	-1.5487	Down	2.6353e-10	2.37595e-09	K14500|1|2e-146|517|smo:SELMODRAFT_103506|BR-signaling kinase [EC:2.7.11.1]	GO:0016020//membrane	GO:0005488//binding;GO:0016301//kinase activity	-	gi|255558866|ref|XP_002520456.1|/3.8163e-166/receptor protein kinase, putative [Ricinus communis]
Pbr012014.1	1521	43	14	5.3503	1.83096	-1.54702	Down	0.000212834	0.000938828	K01184|1|2e-20|99.0|aly:ARALYDRAFT_479028|polygalacturonase [EC:3.2.1.15]	GO:0005618//cell wall;GO:0043231//intracellular membrane-bounded organelle	GO:0004553//hydrolase activity, hydrolyzing O-glycosyl compounds	GO:0045229//external encapsulating structure organization;GO:0044238//primary metabolic process	gi|296083315|emb|CBI22951.3|/0/unnamed protein product [Vitis vinifera]
Pbr004725.1	1518	129	42	16.0826	5.50373	-1.54702	Down	9.9762e-11	9.27929e-10	K04733|1|4e-43|174|smo:SELMODRAFT_230241|interleukin-1 receptor-associated kinase 4 [EC:2.7.11.1];K13430|4|1e-39|162|zma:100283091|serine/threonine-protein kinase PBS1 [EC:2.7.11.1];K13415|5|4e-39|160|rcu:RCOM_0478150|protein brassinosteroid insensitive 1 [EC:2.7.10.1 2.7.11.1]	-	-	-	gi|358347946|ref|XP_003638011.1|/5.69981e-139/Cysteine-rich receptor-like protein kinase, partial [Medicago truncatula]
Pbr030152.2	1344	86	28	12.1098	4.14418	-1.54702	Down	1.36692e-07	9.5203e-07	K04733|1|2e-59|228|smo:SELMODRAFT_159261|interleukin-1 receptor-associated kinase 4 [EC:2.7.11.1];K13416|2|1e-58|225|rcu:RCOM_1534760|brassinosteroid insensitive 1-associated receptor kinase 1 [EC:2.7.10.1 2.7.11.1];K13418|5|2e-57|221|rcu:RCOM_0186340|somatic embryogenesis receptor kinase 1 [EC:2.7.10.1 2.7.11.1]	GO:0016020//membrane	GO:0004871//signal transducer activity;GO:0030246//carbohydrate binding;GO:0004713//protein tyrosine kinase activity;GO:0032559	GO:0006464//cellular protein modification process;GO:0008037//cell recognition	gi|296088674|emb|CBI38124.3|/0/unnamed protein product [Vitis vinifera]
Pbr016868.1	1719	92	30	10.1286	3.47156	-1.54478	Down	5.12832e-08	3.73963e-07	K13754|1|3e-154|543|mtr:MTR_7g086690|solute carrier family 24 (sodium/potassium/calcium exchanger), member 6	GO:0044464//cell part	-	-	gi|255569428|ref|XP_002525681.1|/3.87232e-171/Sodium/potassium/calcium exchanger 6 precursor, putative [Ricinus communis]
Pbr023431.1	1248	138	45	20.9268	7.17261	-1.54478	Down	2.32764e-11	2.2702e-10	K13430|1|2e-133|474|rcu:RCOM_1078760|serine/threonine-protein kinase PBS1 [EC:2.7.11.1]	GO:0016020//membrane	GO:0004871//signal transducer activity;GO:0004713//protein tyrosine kinase activity;GO:0032559	GO:0006464//cellular protein modification process	gi|356542581|ref|XP_003539745.1|/1.18982e-168/PREDICTED: probable serine/threonine-protein kinase RLCKVII-like [Glycine max]
Pbr020714.1	855	49	16	10.846	3.72249	-1.54282	Down	7.77164e-05	0.000372278	K11498|1|5e-07|53.1|smo:SELMODRAFT_83012|centromeric protein E	-	GO:0005488//binding	-	gi|224078329|ref|XP_002305522.1|/2.17843e-66/predicted protein [Populus trichocarpa]
Pbr020454.1	543	101	33	35.2015	12.0891	-1.54193	Down	1.18244e-08	9.1841e-08	K05277|1|7e-21|98.2|pop:POPTR_646527|leucoanthocyanidin dioxygenase [EC:1.14.11.19]	-	GO:0016679//oxidoreductase activity, acting on diphenols and related substances as donors;GO:0016706//oxidoreductase activity, acting on paired donors, with incorporation or reduction of molecular oxygen, 2-oxoglutarate as one donor, and incorporation of one atom each of oxygen into both donors	GO:0009813//flavonoid biosynthetic process;GO:0007568//aging	gi|255575141|ref|XP_002528475.1|/1.02085e-54/Leucoanthocyanidin dioxygenase, putative [Ricinus communis]
Pbr023003.1	4380	101	33	4.36402	1.49872	-1.54193	Down	1.18244e-08	9.18149e-08	K03013|1|1e-155|550|vvi:100258335|DNA-directed RNA polymerases I, II, and III subunit RPABC1;K13457|5|4e-63|242|osa:4342596|disease resistance protein RPM1	-	-	-	gi|147772086|emb|CAN60242.1|/0/hypothetical protein VITISV_018142 [Vitis vinifera]
Pbr022175.1	594	116	38	36.9582	12.7255	-1.53817	Down	1.03278e-09	8.8581e-09	-	-	-	-	-
Pbr000297.1	186	58	19	59.0139	20.3198	-1.53817	Down	1.73399e-05	9.19665e-05	-	-	-	-	-
Pbr026690.1	864	213	70	46.6557	16.1162	-1.53354	Down	1.33158e-16	1.80199e-15	K12608|1|3e-124|442|pop:POPTR_551020|CCR4-NOT complex subunit CAF16	GO:0044464//cell part	GO:0017111//nucleoside-triphosphatase activity;GO:0032559	GO:0009207;GO:0016192//vesicle-mediated transport	gi|224066231|ref|XP_002302037.1|/3.36758e-123/ABC transporter family protein [Populus trichocarpa]
Pbr003356.1	1470	73	24	9.3982	3.24768	-1.53297	Down	1.45391e-06	8.94653e-06	-	-	-	GO:0006810//transport	gi|224057042|ref|XP_002299116.1|/9.33249e-131/neutral amino acid transport protein [Populus trichocarpa]
Pbr003660.1	1056	73	24	13.0827	4.52092	-1.53297	Down	1.45391e-06	8.94855e-06	K13426|1|4e-15|80.5|vvi:100251862|WRKY transcription factor 29	-	-	-	gi|224075078|ref|XP_002304549.1|/1.82069e-87/predicted protein [Populus trichocarpa]
Pbr013358.1	459	234	77	96.4811	33.3701	-1.53169	Down	4.59024e-18	6.66073e-17	-	-	-	-	gi|224111598|ref|XP_002315915.1|/1.37378e-28/predicted protein [Populus trichocarpa]
Pbr039229.1	642	167	55	49.2289	17.0415	-1.53046	Down	2.72074e-13	3.05764e-12	K13464|1|4e-32|135|rcu:RCOM_0684970|jasmonate ZIM domain-containing protein	-	-	-	gi|255576619|ref|XP_002529200.1|/3.96327e-31/conserved hypothetical protein [Ricinus communis]
Pbr008416.2	906	1899	626	396.676	137.444	-1.52912	Down	1.12613e-134	1.00502e-132	K09872|1|3e-135|479|rcu:RCOM_1356060|aquaporin PIP	GO:0031224//intrinsic to membrane	-	GO:0006810//transport	gi|350543336|gb|AEQ29857.1|/2.3224e-154/aquaporin PIP2 [Malus prunifolia]
Pbr002242.1	1122	182	60	30.6985	10.6375	-1.52902	Down	2.43278e-14	2.90752e-13	K04371|1|0.0|671|pop:POPTR_414369|extracellular signal-regulated kinase 1/2 [EC:2.7.11.24]	GO:0043231//intracellular membrane-bounded organelle	GO:0032559;GO:0004702//receptor signaling protein serine/threonine kinase activity	GO:0009725//response to hormone stimulus;GO:0009867//jasmonic acid mediated signaling pathway;GO:0006796//phosphate-containing compound metabolic process;GO:0009611//response to wounding;GO:0009627//systemic acquired resistance;GO:0030865//cortical cytoskeleton organization;GO:0006971//hypotonic response;GO:0006464//cellular protein modification process	gi|224075008|ref|XP_002304516.1|/0/predicted protein [Populus trichocarpa]
Pbr010325.1	981	373	123	71.958	24.9411	-1.52863	Down	8.21342e-28	1.70961e-26	K08486|1|1e-101|367|aly:ARALYDRAFT_897385|syntaxin 1B/2/3	GO:0043234//protein complex;GO:0016020//membrane	GO:0005515//protein binding	GO:0051707//response to other organism;GO:0009725//response to hormone stimulus;GO:0009626//plant-type hypersensitive response;GO:0010185;GO:0016044//cellular membrane organization;GO:0006605//protein targeting;GO:0007165//signal transduction	gi|255566161|ref|XP_002524068.1|/6.33039e-108/syntaxin, putative [Ricinus communis]
Pbr013861.1	975	130	43	25.2335	8.7729	-1.52422	Down	1.34263e-10	1.23579e-09	K00913|1|4e-146|515|vvi:100242009|inositol-1,3,4-trisphosphate 5/6-kinase / inositol-tetrakisphosphate 1-kinase [EC:2.7.1.159 2.7.1.134]	GO:0044464//cell part	GO:0046872//metal ion binding;GO:0051766//inositol trisphosphate kinase activity;GO:0051765//inositol tetrakisphosphate kinase activity;GO:0032559	GO:0043647//inositol phosphate metabolic process;GO:0006796//phosphate-containing compound metabolic process	gi|225427161|ref|XP_002279736.1|/3.75883e-145/PREDICTED: inositol-tetrakisphosphate 1-kinase 1-like [Vitis vinifera]
Pbr006277.1	2937	529	175	34.0872	11.8526	-1.52403	Down	1.32245e-38	3.61148e-37	K13447|1|0.0|1479|rcu:RCOM_1689300|respiratory burst oxidase [EC:1.6.3.- 1.11.1.-]	GO:0016021//integral to membrane	GO:0046914//transition metal ion binding;GO:0016209//antioxidant activity;GO:0050664//oxidoreductase activity, acting on NADH or NADPH, oxygen as acceptor;GO:0050662//coenzyme binding	GO:0012501//programmed cell death;GO:0006952//defense response;GO:0010118//stomatal movement;GO:0009755//hormone-mediated signaling pathway;GO:0042743//hydrogen peroxide metabolic process;GO:0002252	gi|255537609|ref|XP_002509871.1|/0/respiratory burst oxidase, putative [Ricinus communis]
Pbr007085.1	2106	157	52	14.1085	4.91162	-1.52229	Down	1.71163e-12	1.82091e-11	-	-	GO:0016788//hydrolase activity, acting on ester bonds	GO:0044238//primary metabolic process	gi|225455868|ref|XP_002274587.1|/0/PREDICTED: lysosomal acid lipase/cholesteryl ester hydrolase-like [Vitis vinifera]
Pbr016376.1	2361	1117	370	89.5357	31.1735	-1.52214	Down	1.84374e-79	9.73902e-78	K11723|1|6e-78|290|rcu:RCOM_1302750|bromodomain-containing protein 7/9	GO:0043231//intracellular membrane-bounded organelle	-	-	gi|225428300|ref|XP_002279830.1|/0/PREDICTED: uncharacterized protein LOC100245230 [Vitis vinifera]
Pbr041871.1	2100	6995	2321	630.387	219.854	-1.51969	Down	0	0	K04079|1|0.0|1117|gmx:100819568|molecular chaperone HtpG	GO:0043231//intracellular membrane-bounded organelle;GO:0030312//external encapsulating structure;GO:0044444//cytoplasmic part	GO:0017111//nucleoside-triphosphatase activity;GO:0005515//protein binding;GO:0032559	GO:0048827//phyllome development;GO:0044267//cellular protein metabolic process;GO:0042742//defense response to bacterium;GO:0009408//response to heat;GO:0009207;GO:0031647//regulation of protein stability;GO:0006970//response to osmotic stress;GO:0009791//post-embryonic development	gi|358248990|ref|NP_001240230.1|/0/uncharacterized protein LOC100819568 [Glycine max]
Pbr035753.1	1911	776	258	76.8493	26.8558	-1.5168	Down	1.8285e-55	6.8875e-54	K07195|1|1e-171|601|aly:ARALYDRAFT_470722|exocyst complex component 7	GO:0043234//protein complex;GO:0043231//intracellular membrane-bounded organelle;GO:0031988//membrane-bounded vesicle;GO:0044444//cytoplasmic part;GO:0016020//membrane	-	GO:0006887//exocytosis	gi|225434439|ref|XP_002272867.1|/0/PREDICTED: uncharacterized protein LOC100255378 [Vitis vinifera]
Pbr030895.1	2895	463	154	30.2671	10.5816	-1.51619	Down	9.4993e-34	2.31622e-32	K03013|1|5e-21|102|vvi:100258335|DNA-directed RNA polymerases I, II, and III subunit RPABC1;K13457|3|2e-14|79.7|pop:POPTR_755797|disease resistance protein RPM1	-	-	-	gi|356515308|ref|XP_003526343.1|/0/PREDICTED: TMV resistance protein N-like [Glycine max]
Pbr005849.1	651	111	37	32.2687	11.3058	-1.51308	Down	3.67126e-09	2.99637e-08	K06966|1|2e-103|373|rcu:RCOM_1597390|	-	GO:0003824//catalytic activity	-	gi|255538900|ref|XP_002510515.1|/1.49956e-102/carboxy-lyase, putative [Ricinus communis]
Pbr000404.1	444	153	51	65.215	22.849	-1.51308	Down	4.0907e-12	4.22675e-11	-	-	-	-	gi|225443610|ref|XP_002279326.1|/1.05427e-32/PREDICTED: uncharacterized protein LOC100241906 [Vitis vinifera]
Pbr008157.1	1419	1317	439	175.648	61.5406	-1.51308	Down	1.47094e-92	9.02697e-91	-	GO:0016020//membrane	-	-	gi|302141857|emb|CBI19060.3|/2.77169e-148/unnamed protein product [Vitis vinifera]
Pbr040910.1	3078	183	61	11.2518	3.94222	-1.51308	Down	3.2559e-14	3.86085e-13	K00924|1|3e-164|577|ath:AT1G28440|[EC:2.7.1.-];K08286|3|7e-153|540|ath:AT4G28490|protein-serine/threonine kinase [EC:2.7.11.-]	GO:0044462;GO:0016020//membrane	GO:0004672//protein kinase activity;GO:0000166//nucleotide binding	GO:0006468//protein phosphorylation;GO:0032501//multicellular organismal process;GO:0003006//developmental process involved in reproduction;GO:0006950//response to stress	gi|224105823|ref|XP_002313944.1|/0/predicted protein [Populus trichocarpa]
Pbr035833.1	510	66	22	24.4914	8.58088	-1.51308	Down	5.80182e-06	3.28786e-05	-	-	-	-	gi|312599829|gb|ADQ91840.1|/1.44286e-25/late embryogenesis abundant protein group 4 protein [Arachis hypogaea]
Pbr024451.1	333	45	15	25.5745	8.96038	-1.51308	Down	0.000191866	0.000853644	-	-	-	-	gi|224141267|ref|XP_002323996.1|/1.0964e-29/predicted protein [Populus trichocarpa]
Pbr038919.1	1182	156	52	24.9773	8.75115	-1.51308	Down	2.52102e-12	2.64794e-11	K04733|1|9e-62|235|smo:SELMODRAFT_159261|interleukin-1 receptor-associated kinase 4 [EC:2.7.11.1];K13430|4|2e-56|218|zma:100283091|serine/threonine-protein kinase PBS1 [EC:2.7.11.1]	-	GO:0004702//receptor signaling protein serine/threonine kinase activity;GO:0032559	GO:0006464//cellular protein modification process	gi|225455972|ref|XP_002278538.1|/6.88717e-171/PREDICTED: G-type lectin S-receptor-like serine/threonine-protein kinase B120 [Vitis vinifera]
Pbr024102.1	1071	1116	374	197.203	69.4643	-1.50534	Down	3.9293e-78	2.03615e-76	K13413|1|9e-135|478|pop:POPTR_563479|mitogen-activated protein kinase kinase 4/5, plant [EC:2.7.12.2]	GO:0043231//intracellular membrane-bounded organelle	GO:0004712//protein serine/threonine/tyrosine kinase activity;GO:0032559	GO:0051707//response to other organism;GO:0007243//intracellular protein kinase cascade;GO:0010374//stomatal complex development;GO:0010375//stomatal complex patterning;GO:0003006//developmental process involved in reproduction;GO:0006464//cellular protein modification process	gi|110083393|dbj|BAE97401.1|/1.39309e-135/mitogen-activated protein kinase 2 [Nicotiana tabacum]
Pbr035121.1	3357	128	43	7.21602	2.54798	-1.50185	Down	2.91466e-10	2.6183e-09	K03265|1|8e-06|51.6|ppp:PHYPADRAFT_165521|peptide chain release factor subunit 1	-	-	-	gi|359480461|ref|XP_002268207.2|/1.297e-38/PREDICTED: probable disease resistance protein At5g66900-like [Vitis vinifera]
Pbr042689.1	1554	119	40	14.4922	5.12022	-1.501	Down	1.25393e-09	1.0638e-08	K01930|1|0.0|753|rcu:RCOM_1482420|folylpolyglutamate synthase [EC:6.3.2.17]	GO:0009532//plastid stroma	GO:0016881//acid-amino acid ligase activity;GO:0032559	GO:0048588//developmental cell growth;GO:0035266//meristem growth;GO:0006760//folic acid-containing compound metabolic process	gi|255566502|ref|XP_002524236.1|/0/folylpolyglutamate synthase, putative [Ricinus communis]
Pbr010324.1	1641	449	151	51.7818	18.3041	-1.50028	Down	2.69082e-32	6.38433e-31	K08486|1|3e-103|374|ath:AT3G11820|syntaxin 1B/2/3	GO:0043234//protein complex;GO:0016020//membrane	GO:0005515//protein binding	GO:0051707//response to other organism;GO:0009725//response to hormone stimulus;GO:0009626//plant-type hypersensitive response;GO:0010185;GO:0016044//cellular membrane organization;GO:0006605//protein targeting;GO:0007165//signal transduction	gi|255566161|ref|XP_002524068.1|/3.13666e-114/syntaxin, putative [Ricinus communis]
Pbr027412.1	480	2105	708	829.946	293.408	-1.50011	Down	5.608e-145	5.35486e-143	K07213|1|2e-11|66.6|bdi:100823139|copper chaperone	GO:0016020//membrane	GO:0043169//cation binding	GO:0006812//cation transport;GO:0009408//response to heat	gi|255587860|ref|XP_002534419.1|/5.1496e-72/metal ion binding protein, putative [Ricinus communis]
Pbr029529.1	1971	4231	1424	406.252	143.715	-1.49916	Down	4.2291e-289	8.88404e-287	K03283|1|0.0|1149|rcu:RCOM_1248100|heat shock 70kDa protein 1/8	-	GO:0016628//oxidoreductase activity, acting on the CH-CH group of donors, NAD or NADP as acceptor;GO:0032559	GO:0008152//metabolic process;GO:0050896//response to stimulus	gi|255573627|ref|XP_002527736.1|/0/heat shock protein, putative [Ricinus communis]
Pbr028035.1	831	309	104	70.3715	24.895	-1.49914	Down	1.08054e-22	1.88794e-21	K15692|1|2e-10|64.7|smo:SELMODRAFT_66937|E3 ubiquitin-protein ligase RNF13 [EC:6.3.2.19];K11982|4|1e-08|58.5|mtr:MTR_5g088720|E3 ubiquitin-protein ligase RNF115/126 [EC:6.3.2.19]	-	GO:0046872//metal ion binding	-	gi|255573109|ref|XP_002527484.1|/7.92671e-42/conserved hypothetical protein [Ricinus communis]
Pbr033632.1	1191	98	33	15.5723	5.51165	-1.49843	Down	3.8169e-08	2.81871e-07	-	-	-	-	gi|255561705|ref|XP_002521862.1|/8.71299e-89/conserved hypothetical protein [Ricinus communis]
Pbr029289.1	765	361	122	89.3069	31.7233	-1.49323	Down	4.16132e-26	8.1639e-25	-	-	GO:0005488//binding	-	gi|225429696|ref|XP_002281841.1|/7.85464e-46/PREDICTED: uncharacterized protein LOC100260963 [Vitis vinifera]
Pbr039761.1	636	68	23	20.2344	7.19366	-1.49201	Down	5.22794e-06	2.97996e-05	-	-	-	-	gi|302143750|emb|CBI22611.3|/1.42833e-25/unnamed protein product [Vitis vinifera]
Pbr032698.1	1041	133	45	24.1791	8.59887	-1.49154	Down	1.62084e-10	1.48286e-09	K13425|1|2e-75|280|rcu:RCOM_1616660|WRKY transcription factor 22	-	-	-	gi|255541712|ref|XP_002511920.1|/2.2579e-74/WRKY transcription factor, putative [Ricinus communis]
Pbr003398.1	5493	65	22	2.23946	0.796696	-1.49105	Down	8.58342e-06	4.7508e-05	K07052|1|0.0|1542|rcu:RCOM_0709070|	GO:0043231//intracellular membrane-bounded organelle	-	-	gi|255550323|ref|XP_002516212.1|/0/conserved hypothetical protein [Ricinus communis]
Pbr007365.1	1866	900	305	91.2788	32.5138	-1.48923	Down	2.20584e-62	9.07218e-61	K13431|1|0.0|906|pop:POPTR_561342|signal recognition particle receptor subunit alpha	GO:0048500//signal recognition particle;GO:0030867//rough endoplasmic reticulum membrane	GO:0017111//nucleoside-triphosphatase activity;GO:0043021//ribonucleoprotein complex binding;GO:0004871//signal transducer activity;GO:0032561//guanyl ribonucleotide binding	GO:0009207;GO:0006613//cotranslational protein targeting to membrane	gi|224091775|ref|XP_002309350.1|/0/predicted protein [Populus trichocarpa]
Pbr018397.1	798	1481	502	351.23	125.135	-1.48892	Down	1.86502e-101	1.26696e-99	-	GO:0009528//plastid inner membrane	-	-	gi|388494298|gb|AFK35215.1|/6.88876e-80/unknown [Lotus japonicus]
Pbr001318.1	1350	118	40	16.542	5.89394	-1.48883	Down	1.84294e-09	1.54667e-08	-	GO:0043231//intracellular membrane-bounded organelle	-	GO:0009987//cellular process	gi|255566213|ref|XP_002524094.1|/1.08457e-154/conserved hypothetical protein [Ricinus communis]
Pbr036170.1	1167	746	253	120.978	43.125	-1.48815	Down	5.94376e-52	2.11627e-50	K00737|1|0.0|723|vvi:100254142|beta-1,4-mannosyl-glycoprotein beta-1,4-N-acetylglucosaminyltransferase [EC:2.4.1.144]	GO:0044464//cell part	GO:0008375//acetylglucosaminyltransferase activity	GO:0006486//protein glycosylation	gi|296081354|emb|CBI16787.3|/0/unnamed protein product [Vitis vinifera]
Pbr018403.1	897	1635	556	344.957	123.3	-1.48425	Down	2.6812e-111	2.00605e-109	K09338|1|2e-33|140|ath:AT3G61890|homeobox-leucine zipper protein	GO:0043231//intracellular membrane-bounded organelle	GO:0001071//nucleic acid binding transcription factor activity;GO:0003677//DNA binding	GO:0006355//regulation of transcription, DNA-dependent;GO:0006970//response to osmotic stress;GO:0009755//hormone-mediated signaling pathway	gi|224068066|ref|XP_002302659.1|/1.09572e-39/predicted protein [Populus trichocarpa]
Pbr037414.1	624	194	66	58.8378	21.0397	-1.48363	Down	1.3502e-14	1.63805e-13	K09286|1|2e-22|103|aly:ARALYDRAFT_470149|EREBP-like factor	-	-	GO:0006351//transcription, DNA-dependent	gi|386646586|gb|AFJ14637.1|/3.51631e-106/dehydration-responsive element-binding protein (DREB5), partial [Malus x domestica]
Pbr006120.1	903	194	66	40.6587	14.539	-1.48363	Down	1.3502e-14	1.63732e-13	K00975|1|2e-153|540|pop:POPTR_830057|glucose-1-phosphate adenylyltransferase [EC:2.7.7.27]	GO:0009536//plastid	GO:0070566//adenylyltransferase activity;GO:0032559	GO:0005982//starch metabolic process;GO:0005977//glycogen metabolic process	gi|224062107|ref|XP_002300758.1|/1.65505e-152/predicted protein [Populus trichocarpa]
Pbr036013.1	2655	47	16	3.35021	1.19877	-1.4827	Down	0.000172098	0.000773633	K13412|1|8e-06|51.2|cre:CHLREDRAFT_128451|calcium-dependent protein kinase [EC:2.7.11.1]	GO:0009536//plastid	GO:0004091//carboxylesterase activity	GO:0044238//primary metabolic process	gi|255554308|ref|XP_002518194.1|/0/triacylglycerol lipase, putative [Ricinus communis]
Pbr019525.1	1455	5284	1801	687.288	246.224	-1.48094	Down	0	0	K09843|1|2e-65|248|aly:ARALYDRAFT_481828|(+)-abscisic acid 8'-hydroxylase [EC:1.14.13.93]	-	GO:0016709//oxidoreductase activity, acting on paired donors, with incorporation or reduction of molecular oxygen, NADH or NADPH as one donor, and incorporation of one atom of oxygen;GO:0005506//iron ion binding	GO:0008152//metabolic process	gi|255563874|ref|XP_002522937.1|/0/cytochrome P450, putative [Ricinus communis]
Pbr005657.1	390	305	104	148.004	53.0454	-1.48034	Down	4.9357e-22	8.40331e-21	-	-	-	-	gi|225442979|ref|XP_002268235.1|/4.76349e-25/PREDICTED: uncharacterized protein LOC100261053 [Vitis vinifera]
Pbr009441.2	1248	1055	360	159.984	57.3809	-1.47929	Down	4.05892e-72	1.92439e-70	-	-	-	-	gi|224112641|ref|XP_002316248.1|/7.43932e-62/predicted protein [Populus trichocarpa]
Pbr000500.1	2919	413	141	26.7766	9.60869	-1.47856	Down	3.11416e-29	6.72821e-28	-	-	-	-	gi|297740511|emb|CBI30693.3|/9.05193e-73/unnamed protein product [Vitis vinifera]
Pbr036638.1	2082	243	83	22.0884	7.93006	-1.47789	Down	8.0592e-18	1.15714e-16	K13416|1|3e-47|188|rcu:RCOM_1534760|brassinosteroid insensitive 1-associated receptor kinase 1 [EC:2.7.10.1 2.7.11.1];K13417|2|4e-47|187|ath:AT2G13790|somatic embryogenesis receptor kinase 4 [EC:2.7.10.1 2.7.11.1];K00924|4|1e-46|186|ath:AT1G24650|[EC:2.7.1.-];K04733|5|2e-46|186|smo:SELMODRAFT_159261|interleukin-1 receptor-associated kinase 4 [EC:2.7.11.1]	-	GO:0004871//signal transducer activity;GO:0004674//protein serine/threonine kinase activity;GO:0032559	GO:0006464//cellular protein modification process	gi|359490857|ref|XP_002268692.2|/7.32582e-143/PREDICTED: probable receptor-like protein kinase At1g67000-like [Vitis vinifera]
Pbr014538.1	1638	666	228	76.9484	27.6886	-1.4746	Down	5.84724e-46	1.90552e-44	K01177|1|0.0|891|pop:POPTR_589941|beta-amylase [EC:3.2.1.2]	GO:0009532//plastid stroma	GO:0016160//amylase activity;GO:0043167//ion binding	GO:0005982//starch metabolic process;GO:0006950//response to stress;GO:0000023//maltose metabolic process	gi|224138788|ref|XP_002326690.1|/0/predicted protein [Populus trichocarpa]
Pbr023899.1	840	578	198	130.223	46.8884	-1.47368	Down	4.5017e-40	1.27132e-38	K09286|1|6e-50|195|ath:AT4G17500|EREBP-like factor;K14517|2|7e-47|185|ath:AT5G47220|ethylene-responsive transcription factor 2	-	-	GO:0009743//response to carbohydrate stimulus;GO:0006351//transcription, DNA-dependent	gi|292668931|gb|ADE41120.1|/7.44098e-96/AP2 domain class transcription factor [Malus x domestica]
Pbr010357.1	687	4175	1431	1150.11	414.345	-1.47287	Down	5.8663e-278	1.15254e-275	K08488|1|6e-26|115|ath:AT1G32270|syntaxin 7	-	-	-	gi|167427545|gb|ABZ80409.1|/4.04357e-72/hairpin-inducing protein [Casuarina glauca]
Pbr030224.1	2190	140	48	12.0983	4.3599	-1.47243	Down	8.1142e-11	7.59913e-10	K04733|1|4e-63|241|smo:SELMODRAFT_230241|interleukin-1 receptor-associated kinase 4 [EC:2.7.11.1];K05658|3|9e-62|236|vvi:100262734|ATP-binding cassette, subfamily B (MDR/TAP), member 1;K00924|4|3e-59|228|ath:AT1G14370|[EC:2.7.1.-];K13430|5|2e-58|226|aly:ARALYDRAFT_909268|serine/threonine-protein kinase PBS1 [EC:2.7.11.1]	-	GO:0005488//binding;GO:0004672//protein kinase activity	-	gi|224096774|ref|XP_002334671.1|/0/predicted protein [Populus trichocarpa]
Pbr039187.1	1128	306	105	51.3395	18.5165	-1.47125	Down	6.50034e-22	1.10328e-20	K07761|1|1e-102|371|ath:AT1G59970|gelatinase A [EC:3.4.24.24]	GO:0031224//intrinsic to membrane;GO:0044421//extracellular region part	GO:0046914//transition metal ion binding;GO:0004175//endopeptidase activity	GO:0019538//protein metabolic process	gi|255558368|ref|XP_002520211.1|/5.92682e-132/Metalloendoproteinase 1 precursor, putative [Ricinus communis]
Pbr018918.1	2418	676	232	52.909	19.0858	-1.47101	Down	1.8401e-46	6.03257e-45	K14494|1|2e-46|186|vvi:100253268|DELLA protein	GO:0043231//intracellular membrane-bounded organelle;GO:0044444//cytoplasmic part	-	GO:0042221//response to chemical stimulus	gi|255586186|ref|XP_002533752.1|/0/transcription factor, putative [Ricinus communis]
Pbr028979.1	1341	160	55	22.5803	8.15856	-1.46868	Down	3.99858e-12	4.13626e-11	-	-	-	-	gi|255587677|ref|XP_002534353.1|/2.57533e-132/conserved hypothetical protein [Ricinus communis]
Pbr037396.1	5334	628	216	22.2816	8.05527	-1.46785	Down	3.77576e-43	1.15209e-41	K07052|1|0.0|1588|vvi:100249222|	GO:0043231//intracellular membrane-bounded organelle	-	-	gi|359484251|ref|XP_002277493.2|/0/PREDICTED: uncharacterized protein LOC100249222 [Vitis vinifera]
Pbr028990.2	651	526	181	152.913	55.3066	-1.46719	Down	2.18106e-36	5.67263e-35	K07901|1|2e-90|329|rcu:RCOM_0249780|Ras-related protein Rab-8A	-	GO:0032561//guanyl ribonucleotide binding;GO:0003824//catalytic activity	GO:0006810//transport;GO:0035556//intracellular signal transduction	gi|327505553|gb|AEA92304.1|/1.11467e-89/Rab2 [Hevea brasiliensis]
Pbr010339.1	2478	1449	499	110.664	40.057	-1.46606	Down	4.35308e-97	2.81036e-95	K09480|1|0.0|1226|gmx:100796354|digalactosyldiacylglycerol synthase [EC:2.4.1.241]	GO:0030659//cytoplasmic vesicle membrane;GO:0009527//plastid outer membrane	GO:0035250//UDP-galactosyltransferase activity	GO:0010876;GO:0042548//regulation of photosynthesis, light reaction;GO:0009247//glycolipid biosynthetic process;GO:0044403//symbiosis, encompassing mutualism through parasitism	gi|356505431|ref|XP_003521494.1|/0/PREDICTED: digalactosyldiacylglycerol synthase 1, chloroplastic-like [Glycine max]
Pbr040390.1	1368	1043	360	144.29	52.3475	-1.46278	Down	3.62726e-70	1.67609e-68	K14432|1|2e-119|404|rcu:RCOM_0813280|ABA responsive element binding factor	-	GO:0005488//binding	-	gi|147795293|emb|CAN64991.1|/1.35781e-118/hypothetical protein VITISV_001773 [Vitis vinifera]
Pbr033231.1	1839	414	143	42.6047	15.468	-1.46173	Down	7.82944e-29	1.67173e-27	K14638|1|2e-108|391|ppp:PHYPADRAFT_189464|solute carrier family 15 (peptide/histidine transporter), member 3/4	GO:0031224//intrinsic to membrane	GO:0004871//signal transducer activity	GO:0015833//peptide transport	gi|224120010|ref|XP_002331115.1|/0/predicted protein [Populus trichocarpa]
Pbr020889.1	429	55	19	24.263	8.81	-1.46154	Down	5.64006e-05	0.000277521	K09754|1|2e-73|272|vvi:100263633|coumaroylquinate(coumaroylshikimate) 3'-monooxygenase [EC:1.14.13.36]	GO:0031224//intrinsic to membrane	GO:0016709//oxidoreductase activity, acting on paired donors, with incorporation or reduction of molecular oxygen, NADH or NADPH as one donor, and incorporation of one atom of oxygen;GO:0005506//iron ion binding	GO:0008152//metabolic process	gi|225440169|ref|XP_002283338.1|/1.34418e-72/PREDICTED: cytochrome P450 98A2 [Vitis vinifera]
Pbr039099.1	1503	214	74	26.946	9.79382	-1.46013	Down	1.29896e-15	1.66777e-14	-	-	-	-	gi|255562838|ref|XP_002522424.1|/3.02411e-92/conserved hypothetical protein [Ricinus communis]
Pbr029631.1	1674	292	101	33.0116	12.0018	-1.45973	Down	9.37268e-21	1.51008e-19	K00924|1|2e-31|135|aly:ARALYDRAFT_489138|[EC:2.7.1.-]	GO:0031410//cytoplasmic vesicle	GO:0004175//endopeptidase activity	GO:0019538//protein metabolic process	gi|255558694|ref|XP_002520371.1|/0/basic 7S globulin 2 precursor small subunit, putative [Ricinus communis]
Pbr039060.1	864	4903	1696	1073.96	390.473	-1.45964	Down	0	0	K09872|1|4e-135|478|rcu:RCOM_1356060|aquaporin PIP	GO:0031224//intrinsic to membrane	-	GO:0006810//transport	gi|13486942|dbj|BAB40143.1|/4.07857e-153/plasma membrane intrinsic protein 2-2 [Pyrus communis]
Pbr020311.1	2577	130	45	9.54702	3.47358	-1.45863	Down	5.08336e-10	4.46084e-09	K04733|1|7e-37|154|aly:ARALYDRAFT_916421|interleukin-1 receptor-associated kinase 4 [EC:2.7.11.1]	-	GO:0016301//kinase activity	-	gi|359491461|ref|XP_002277015.2|/3.25998e-119/PREDICTED: uncharacterized protein LOC100261246 [Vitis vinifera]
Pbr025532.1	1239	179	62	27.3414	9.95405	-1.45773	Down	2.89256e-13	3.24273e-12	K13420|1|2e-27|122|pop:POPTR_1075175|LRR receptor-like serine/threonine-protein kinase FLS2 [EC:2.7.11.1]	-	GO:0016491//oxidoreductase activity	GO:0008152//metabolic process	gi|255555307|ref|XP_002518690.1|/2.10274e-125/serine-threonine protein kinase, plant-type, putative [Ricinus communis]
Pbr005752.2	1359	277	96	38.5744	14.0518	-1.45689	Down	1.03039e-19	1.59247e-18	-	-	-	-	gi|225459860|ref|XP_002285931.1|/0/PREDICTED: uncharacterized protein LOC100252277 [Vitis vinifera]
Pbr039359.1	1071	72	25	12.7228	4.64333	-1.45418	Down	4.20594e-06	2.4309e-05	-	-	-	-	gi|224085053|ref|XP_002307472.1|/3.47939e-86/predicted protein [Populus trichocarpa]
Pbr031706.2	1284	561	195	82.6869	30.2099	-1.45264	Down	3.74368e-38	1.01024e-36	-	GO:0044464//cell part	-	-	gi|225444824|ref|XP_002280579.1|/2.94231e-178/PREDICTED: uncharacterized membrane protein C776.05-like [Vitis vinifera]
Pbr012622.1	1881	69	24	6.94224	2.53806	-1.45167	Down	6.89654e-06	3.8681e-05	K10576|1|8e-72|270|vvi:100250088|ubiquitin-conjugating enzyme E2 H [EC:6.3.2.19];K13415|2|8e-56|216|sbi:SORBI_03g032990|protein brassinosteroid insensitive 1 [EC:2.7.10.1 2.7.11.1]	GO:0031090//organelle membrane	GO:0000166//nucleotide binding;GO:0016301//kinase activity	GO:0009987//cellular process;GO:0008152//metabolic process	gi|255580373|ref|XP_002531014.1|/0/ATP binding protein, putative [Ricinus communis]
Pbr019820.1	1413	629	219	84.2457	30.8306	-1.45024	Down	1.78465e-42	5.35573e-41	K01772|1|0.0|663|gmx:100813423|ferrochelatase [EC:4.99.1.1]	GO:0009536//plastid	GO:0016772//transferase activity, transferring phosphorus-containing groups;GO:0005488//binding;GO:0016829//lyase activity	GO:0006779//porphyrin-containing compound biosynthetic process;GO:0006351//transcription, DNA-dependent;GO:0006950//response to stress	gi|356506948|ref|XP_003522235.1|/0/PREDICTED: ferrochelatase-2, chloroplastic-like [Glycine max]
Pbr011539.1	1794	333	116	35.1286	12.8622	-1.44951	Down	3.16844e-23	5.65166e-22	-	-	-	-	gi|19110917|gb|AAL85347.1|AF479625_1/6.77355e-158/EDS1-like protein [Nicotiana benthamiana]
Pbr030763.1	1776	66	23	7.03299	2.57611	-1.44894	Down	1.13177e-05	6.15195e-05	K00423|1|1e-147|521|ath:AT1G55570|L-ascorbate oxidase [EC:1.10.3.3]	GO:0005618//cell wall;GO:0031225//anchored to membrane;GO:0031090//organelle membrane;GO:0005576//extracellular region;GO:0031410//cytoplasmic vesicle	GO:0046914//transition metal ion binding;GO:0016682//oxidoreductase activity, acting on diphenols and related substances as donors, oxygen as acceptor	GO:0009826//unidimensional cell growth;GO:0008152//metabolic process	gi|255583640|ref|XP_002532575.1|/0/multicopper oxidase, putative [Ricinus communis]
Pbr021032.2	3618	3576	1248	187.054	68.616	-1.44684	Down	3.61886e-232	5.84778e-230	-	-	-	GO:0006950//response to stress	gi|224064112|ref|XP_002301387.1|/3.75623e-116/predicted protein [Populus trichocarpa]
Pbr031010.1	714	9177	3204	2432.44	892.634	-1.44626	Down	0	0	K00432|1|4e-92|335|pop:POPTR_749200|glutathione peroxidase [EC:1.11.1.9]	GO:0016020//membrane;GO:0009536//plastid	GO:0004601//peroxidase activity	GO:0006970//response to osmotic stress;GO:0008152//metabolic process;GO:0010038//response to metal ion	gi|224071850|ref|XP_002303583.1|/4.15525e-91/glutathione peroxidase [Populus trichocarpa]
Pbr011008.1	927	126	44	25.7235	9.44175	-1.44596	Down	1.20478e-09	1.02496e-08	-	-	-	-	gi|225426832|ref|XP_002276651.1|/1.02571e-112/PREDICTED: uncharacterized protein LOC100254717 [Vitis vinifera]
Pbr021358.1	690	578	202	158.532	58.2347	-1.44483	Down	5.8771e-39	1.61467e-37	-	-	-	-	gi|297831074|ref|XP_002883419.1|/4.23229e-61/hypothetical protein ARALYDRAFT_898842 [Arabidopsis lyrata subsp. lyrata]
Pbr022872.1	270	143	50	100.233	36.8371	-1.44413	Down	9.55622e-11	8.89774e-10	-	-	-	-	gi|115470939|ref|NP_001059068.1|/1.70304e-06/Os07g0185900 [Oryza sativa Japonica Group]
Pbr013690.1	564	2764	967	927.466	341.057	-1.44328	Down	2.96788e-179	3.43432e-177	K06689|1|7e-72|267|vvi:100232965|ubiquitin-conjugating enzyme E2 D/E [EC:6.3.2.19]	-	GO:0016879//ligase activity, forming carbon-nitrogen bonds;GO:0032559	GO:0006464//cellular protein modification process	gi|255583802|ref|XP_002532653.1|/6.59864e-71/ubiquitin-conjugating enzyme E2, putative [Ricinus communis]
Pbr008287.1	681	331	116	91.9856	33.8837	-1.44082	Down	6.6639e-23	1.17561e-21	K12134|1|7e-20|95.5|aly:ARALYDRAFT_904154|circadian clock associated 1;K12133|3|9e-20|95.1|ath:AT1G01060|LATE ELONGATED HYPOCOTYL	GO:0043231//intracellular membrane-bounded organelle	-	GO:0010038//response to metal ion;GO:0009725//response to hormone stimulus;GO:0048511//rhythmic process;GO:0006970//response to osmotic stress	gi|224069312|ref|XP_002326327.1|/8.82387e-80/predicted protein [Populus trichocarpa]
Pbr028210.1	720	74	26	19.4508	7.18324	-1.43713	Down	3.75738e-06	2.18925e-05	K09250|1|7e-113|404|vvi:100251241|cellular nucleic acid-binding protein	-	GO:0046872//metal ion binding	-	gi|225449579|ref|XP_002283925.1|/7.4073e-112/PREDICTED: cellular nucleic acid-binding protein [Vitis vinifera]
Pbr016821.1	387	128	45	62.5948	23.1303	-1.43626	Down	1.0791e-09	9.23505e-09	-	-	-	-	gi|224123064|ref|XP_002318984.1|/3.77961e-30/predicted protein [Populus trichocarpa]
Pbr000313.1	966	108	38	21.1585	7.82503	-1.43507	Down	2.23186e-08	1.68883e-07	-	-	GO:0016787//hydrolase activity	-	gi|148910476|gb|ABR18313.1|/1.09194e-61/unknown [Picea sitchensis]
Pbr024083.1	3348	156	55	8.81817	3.26781	-1.43216	Down	1.79672e-11	1.77136e-10	K01537|1|0.0|1507|aly:ARALYDRAFT_479638|Ca2+-transporting ATPase [EC:3.6.3.8]	GO:0031224//intrinsic to membrane	GO:0046873//metal ion transmembrane transporter activity;GO:0019829//cation-transporting ATPase activity;GO:0005515//protein binding;GO:0032559	GO:0009206;GO:0048229//gametophyte development;GO:0009566//fertilization;GO:0006816//calcium ion transport;GO:0048513//organ development;GO:0003006//developmental process involved in reproduction	gi|356547482|ref|XP_003542141.1|/0/PREDICTED: calcium-transporting ATPase 9, plasma membrane-type-like [Glycine max]
Pbr020949.2	2454	703	248	54.215	20.1028	-1.4313	Down	2.19836e-46	7.19844e-45	K11643|1|9e-07|54.3|ppp:PHYPADRAFT_145844|chromodomain-helicase-DNA-binding protein 4 [EC:3.6.4.12]	-	GO:0046872//metal ion binding	-	gi|356548148|ref|XP_003542465.1|/0/PREDICTED: uncharacterized protein LOC100808999 [Glycine max]
Pbr018243.2	2886	119	42	7.80351	2.89489	-1.43061	Down	4.63324e-09	3.74568e-08	K00924|1|4e-101|367|ath:AT1G28440|[EC:2.7.1.-];K08286|2|8e-101|367|ath:AT4G28490|protein-serine/threonine kinase [EC:2.7.11.-];K13420|5|7e-91|333|osa:4337016|LRR receptor-like serine/threonine-protein kinase FLS2 [EC:2.7.11.1]	GO:0016020//membrane	GO:0016301//kinase activity;GO:0000166//nucleotide binding	GO:0008152//metabolic process	gi|224135907|ref|XP_002327333.1|/0/predicted protein [Populus trichocarpa]
Pbr018288.2	2010	51	18	4.8019	1.78138	-1.43061	Down	0.000136775	0.000625765	-	GO:0031224//intrinsic to membrane	GO:0005275//amine transmembrane transporter activity	GO:0006865//amino acid transport	gi|357464761|ref|XP_003602662.1|/0/Amino-acid permease, putative [Medicago truncatula]
Pbr031825.2	3246	218	77	12.71	4.71869	-1.42951	Down	1.98301e-15	2.52348e-14	K01537|1|0.0|1480|aly:ARALYDRAFT_479638|Ca2+-transporting ATPase [EC:3.6.3.8]	GO:0031224//intrinsic to membrane	GO:0046873//metal ion transmembrane transporter activity;GO:0019829//cation-transporting ATPase activity;GO:0005515//protein binding;GO:0032559	GO:0009206;GO:0048229//gametophyte development;GO:0009566//fertilization;GO:0006816//calcium ion transport;GO:0048513//organ development;GO:0003006//developmental process involved in reproduction	gi|356547482|ref|XP_003542141.1|/0/PREDICTED: calcium-transporting ATPase 9, plasma membrane-type-like [Glycine max]
Pbr039120.1	1260	3308	1169	496.86	184.554	-1.4288	Down	5.98504e-211	8.55735e-209	K00924|1|5e-159|558|ath:AT1G14370|[EC:2.7.1.-];K05658|3|1e-122|437|vvi:100262734|ATP-binding cassette, subfamily B (MDR/TAP), member 1;K04733|4|2e-120|431|pop:POPTR_878434|interleukin-1 receptor-associated kinase 4 [EC:2.7.11.1]	GO:0005737//cytoplasm;GO:0043231//intracellular membrane-bounded organelle;GO:0016020//membrane	GO:0004713//protein tyrosine kinase activity;GO:0032559	GO:0006464//cellular protein modification process	gi|225425762|ref|XP_002277256.1|/0/PREDICTED: protein kinase 2B, chloroplastic [Vitis vinifera]
Pbr040066.1	681	979	346	272.066	101.067	-1.42865	Down	9.65682e-64	4.03856e-62	K13993|1|1e-26|117|ppp:PHYPADRAFT_81689|HSP20 family protein	GO:0009536//plastid	-	GO:0000302//response to reactive oxygen species;GO:0009642//response to light intensity	gi|172050751|gb|ACB70176.1|/8.29729e-62/small heat shock protein [Capparis spinosa]
Pbr039758.1	1275	444	157	65.904	24.4945	-1.42791	Down	8.4024e-30	1.84158e-28	K14190|1|0.0|657|pop:POPTR_660608|GDP-L-galactose phosphorylase [EC:2.7.7.69]	-	-	-	gi|225380880|gb|ACN88681.1|/0/VTC2-like protein [Malus x domestica]
Pbr026232.1	3189	591	209	35.0729	13.0368	-1.42777	Down	4.00962e-39	1.10605e-37	K05285|1|0.0|671|vvi:100254323|phosphatidylinositol glycan, class N [EC:2.7.-.-]	GO:0031090//organelle membrane;GO:0043231//intracellular membrane-bounded organelle	GO:0016788//hydrolase activity, acting on ester bonds	GO:0006497//protein lipidation	gi|359488864|ref|XP_003633835.1|/0/PREDICTED: GPI ethanolamine phosphate transferase 1-like [Vitis vinifera]
Pbr008715.1	1362	82	29	11.394	4.23546	-1.42768	Down	1.25187e-06	7.78577e-06	K14497|1|2e-21|101|aly:ARALYDRAFT_492207|protein phosphatase 2C [EC:3.1.3.16];K01090|3|2e-20|99.0|sbi:SORBI_01g038410|protein phosphatase [EC:3.1.3.16]	-	GO:0016791//phosphatase activity	-	gi|312283003|dbj|BAJ34367.1|/0/unnamed protein product [Thellungiella halophila]
Pbr003341.1	582	130	46	42.2726	15.7222	-1.42692	Down	9.6518e-10	8.30176e-09	-	-	-	-	gi|224073184|ref|XP_002304013.1|/1.01491e-69/predicted protein [Populus trichocarpa]
Pbr033127.1	369	2657	942	1362.71	507.813	-1.42411	Down	5.28372e-169	5.77172e-167	-	GO:0009534//chloroplast thylakoid	-	GO:0006950//response to stress;GO:0009642//response to light intensity;GO:0009767//photosynthetic electron transport chain	gi|255574925|ref|XP_002528369.1|/2.25633e-43/conserved hypothetical protein [Ricinus communis]
Pbr016627.1	1857	93	33	9.47786	3.53493	-1.42288	Down	2.56438e-07	1.7283e-06	K10576|1|3e-70|264|vvi:100250088|ubiquitin-conjugating enzyme E2 H [EC:6.3.2.19];K13415|2|3e-60|231|sbi:SORBI_03g032990|protein brassinosteroid insensitive 1 [EC:2.7.10.1 2.7.11.1]	GO:0031090//organelle membrane	GO:0005488//binding;GO:0016301//kinase activity	-	gi|255580373|ref|XP_002531014.1|/0/ATP binding protein, putative [Ricinus communis]
Pbr014612.1	1452	5223	1855	680.758	254.13	-1.42157	Down	0	0	K00924|1|6e-117|419|osa:4342410|[EC:2.7.1.-];K07198|3|1e-52|205|gmx:100806916|5'-AMP-activated protein kinase, catalytic alpha subunit [EC:2.7.11.11]	-	GO:0004674//protein serine/threonine kinase activity;GO:0032559	GO:0006464//cellular protein modification process;GO:0023052//signaling	gi|224139330|ref|XP_002323059.1|/0/predicted protein [Populus trichocarpa]
Pbr028952.1	2067	515	183	47.1526	17.6112	-1.42084	Down	4.57156e-34	1.12069e-32	K05681|1|6e-51|200|cme:CMS467C|ATP-binding cassette, subfamily G (WHITE), member 2;K12843|2|3e-48|191|vvi:100248403|U4/U6 small nuclear ribonucleoprotein PRP3;K05663|4|1e-10|66.6|cre:CHLREDRAFT_105113|mitochondrial ABC transporter ATM	GO:0044464//cell part	GO:0017111//nucleoside-triphosphatase activity;GO:0015604//organic phosphonate transmembrane transporter activity;GO:0032559	GO:0009207	gi|255569405|ref|XP_002525670.1|/0/ATP-binding cassette transporter, putative [Ricinus communis]
Pbr038352.1	3783	104	37	5.20279	1.94556	-1.4191	Down	5.28362e-08	3.84467e-07	K03013|1|3e-166|584|vvi:100258335|DNA-directed RNA polymerases I, II, and III subunit RPABC1;K13457|4|1e-54|214|osa:4342596|disease resistance protein RPM1	-	-	-	gi|225448305|ref|XP_002265391.1|/0/PREDICTED: putative disease resistance RPP13-like protein 1 [Vitis vinifera]
Pbr032990.1	3828	250	89	12.3597	4.62485	-1.41816	Down	2.7406e-17	3.83417e-16	K14510|1|8e-40|164|ppp:PHYPADRAFT_30352|serine/threonine-protein kinase CTR1 [EC:2.7.11.1];K04424|3|5e-39|162|aly:ARALYDRAFT_909157|sterile alpha motif and leucine zipper containing kinase AZK [EC:2.7.11.25]	GO:0044444//cytoplasmic part	GO:0004672//protein kinase activity;GO:0000166//nucleotide binding	-	gi|255560213|ref|XP_002521124.1|/0/serine/threonine protein kinase, putative [Ricinus communis]
Pbr033719.1	1515	505	180	63.0838	23.6341	-1.4164	Down	2.7501e-33	6.65212e-32	K00967|1|2e-179|627|vvi:100251543|ethanolamine-phosphate cytidylyltransferase [EC:2.7.7.14]	-	GO:0016772//transferase activity, transferring phosphorus-containing groups	GO:0008152//metabolic process	gi|225462533|ref|XP_002265606.1|/2.13529e-178/PREDICTED: ethanolamine-phosphate cytidylyltransferase [Vitis vinifera]
Pbr007826.1	372	129	46	65.6275	24.5977	-1.41578	Down	1.39982e-09	1.18205e-08	K14488|1|5e-41|163|pop:POPTR_664170|SAUR family protein	-	-	GO:0009725//response to hormone stimulus	gi|224128011|ref|XP_002320219.1|/6.76889e-40/SAUR family protein [Populus trichocarpa]
Pbr010707.1	1881	2222	793	223.56	83.8617	-1.41458	Down	2.99854e-140	2.77583e-138	K14431|1|2e-25|115|aly:ARALYDRAFT_311885|transcription factor TGA;K08332|2|2e-21|102|vcn:VOLCADRAFT_41528|vacuolar protein 8	GO:0043234//protein complex	GO:0033612//receptor serine/threonine kinase binding;GO:0019787//small conjugating protein ligase activity	GO:0032446//protein modification by small protein conjugation	gi|224100743|ref|XP_002311996.1|/0/predicted protein [Populus trichocarpa]
Pbr008227.1	327	168	60	97.2301	36.4992	-1.41354	Down	4.89044e-12	5.00386e-11	-	-	-	-	gi|225439854|ref|XP_002278074.1|/1.35277e-19/PREDICTED: uncharacterized protein LOC100256772 [Vitis vinifera]
Pbr017478.1	3036	70	25	4.3635	1.63801	-1.41354	Down	8.98126e-06	4.95694e-05	K13420|1|2e-72|272|pop:POPTR_1075175|LRR receptor-like serine/threonine-protein kinase FLS2 [EC:2.7.11.1]	-	-	-	gi|14330714|emb|CAC40825.1|/0/HcrVf1 protein [Malus floribunda]
Pbr035270.1	1716	469	168	51.7243	19.4747	-1.40924	Down	8.32596e-31	1.88379e-29	K06636|1|5e-19|94.4|ppp:PHYPADRAFT_79481|structural maintenance of chromosome 1	-	-	-	gi|255567094|ref|XP_002524529.1|/6.18265e-161/conserved hypothetical protein [Ricinus communis]
Pbr026952.1	1926	533	191	52.3733	19.7268	-1.40868	Down	9.08482e-35	2.26573e-33	-	GO:0016020//membrane	-	-	gi|255543142|ref|XP_002512634.1|/5.61172e-174/conserved hypothetical protein [Ricinus communis]
Pbr004366.1	1131	2381	854	398.415	150.202	-1.40737	Down	5.23576e-149	5.10655e-147	K10046|1|0.0|743|rcu:RCOM_0484660|GDP-D-mannose 3', 5'-epimerase [EC:5.1.3.18 5.1.3.-]	-	GO:0048037//cofactor binding;GO:0016857//racemase and epimerase activity, acting on carbohydrates and derivatives	GO:0008152//metabolic process	gi|225380888|gb|ACN88685.1|/0/GDP-D-mannose-3',5'-epimerase [Malus x domestica]
Pbr001827.1	2640	184	66	13.1902	4.97301	-1.40728	Down	5.67814e-13	6.23499e-12	K06694|1|6e-17|88.2|zma:100284046|26S proteasome non-ATPase regulatory subunit 10	GO:0031224//intrinsic to membrane	GO:0005249//voltage-gated potassium channel activity;GO:0046873//metal ion transmembrane transporter activity;GO:0000166//nucleotide binding	GO:0048588//developmental cell growth;GO:0006970//response to osmotic stress;GO:0030001//metal ion transport	gi|255576976|ref|XP_002529373.1|/0/Potassium channel AKT1, putative [Ricinus communis]
Pbr007577.1	570	2352	844	780.911	294.542	-1.40669	Down	4.1405e-147	4.00968e-145	-	-	-	GO:0009743//response to carbohydrate stimulus	gi|225440928|ref|XP_002282913.1|/3.32238e-54/PREDICTED: zinc finger A20 and AN1 domain-containing stress-associated protein 4 isoform 1 [Vitis vinifera]
Pbr010280.1	1176	78	28	12.5524	4.7362	-1.40616	Down	2.97828e-06	1.76124e-05	-	GO:0031225//anchored to membrane;GO:0031090//organelle membrane	-	-	gi|157273672|gb|ABV27490.1|/4.6172e-143/fasciclin-like arabinogalactan protein 19 [Gossypium hirsutum]
Pbr016042.1	1476	117	42	15.0016	5.66034	-1.40616	Down	9.74846e-09	7.65002e-08	-	GO:0044464//cell part	GO:0022891//substrate-specific transmembrane transporter activity	GO:0009566//fertilization	gi|255545694|ref|XP_002513907.1|/0/carbohydrate transporter, putative [Ricinus communis]
Pbr015505.1	2553	493	177	36.5456	13.7912	-1.40595	Down	3.42456e-32	8.07611e-31	-	-	-	-	gi|255546371|ref|XP_002514245.1|/0/conserved hypothetical protein [Ricinus communis]
Pbr010371.1	849	142	51	31.6534	11.9493	-1.40543	Down	2.6057e-10	2.35081e-09	K12581|1|7e-79|291|pop:POPTR_639926|CCR4-NOT transcription complex subunit 7/8	GO:0043231//intracellular membrane-bounded organelle	GO:0005488//binding;GO:0000175//3'-5'-exoribonuclease activity	-	gi|356505410|ref|XP_003521484.1|/2.58792e-120/PREDICTED: probable CCR4-associated factor 1 homolog 11-like [Glycine max]
Pbr038549.1	1617	2806	1008	328.41	124.002	-1.40513	Down	7.78328e-175	8.71121e-173	K08150|1|3e-69|261|vvi:100268023|MFS transporter, SP family, solute carrier family 2 (myo-inositol transporter), member 13	GO:0031224//intrinsic to membrane	GO:0016628//oxidoreductase activity, acting on the CH-CH group of donors, NAD or NADP as acceptor;GO:0022857//transmembrane transporter activity	GO:0008152//metabolic process;GO:0071702	gi|51849627|dbj|BAD42345.1|/0/sorbitol transporter [Malus x domestica]
Pbr017682.1	1944	14530	5220	1414.52	534.138	-1.40503	Down	0	0	K03283|1|0.0|1169|rcu:RCOM_1248100|heat shock 70kDa protein 1/8	-	GO:0016628//oxidoreductase activity, acting on the CH-CH group of donors, NAD or NADP as acceptor;GO:0032559	GO:0008152//metabolic process;GO:0050896//response to stimulus	gi|255573627|ref|XP_002527736.1|/0/heat shock protein, putative [Ricinus communis]
Pbr028109.1	516	64	23	23.473	8.86661	-1.40455	Down	2.41594e-05	0.000125146	-	GO:0044425//membrane part	GO:0004872//receptor activity;GO:0032559	GO:0006952//defense response;GO:0012501//programmed cell death;GO:0023052//signaling	gi|302398845|gb|ADL36717.1|/7.55611e-78/HD domain class transcription factor [Malus x domestica]
Pbr022642.1	1680	233	84	26.2474	9.94602	-1.39998	Down	6.26018e-16	8.19555e-15	K09571|1|2e-15|82.4|bdi:100836575|FK506-binding protein 4/5 [EC:5.2.1.8]	-	-	-	gi|255549607|ref|XP_002515855.1|/0/fk506 binding protein, putative [Ricinus communis]
Pbr040424.1	2595	513	185	37.4127	14.1812	-1.39955	Down	3.2587e-33	7.86147e-32	K01931|1|1e-102|372|pop:POPTR_879783|protein neuralized [EC:6.3.2.19]	-	-	-	gi|356544682|ref|XP_003540776.1|/0/PREDICTED: uncharacterized protein LOC100804184 [Glycine max]
Pbr002275.1	450	61	22	25.6541	9.725	-1.39942	Down	3.9675e-05	0.0001995	-	-	-	-	gi|224138804|ref|XP_002326694.1|/3.57989e-31/predicted protein [Populus trichocarpa]
Pbr023960.1	1716	169	61	18.6384	7.07118	-1.39825	Down	6.29898e-12	6.39e-11	K13412|1|0.0|960|rcu:RCOM_1386570|calcium-dependent protein kinase [EC:2.7.11.1]	GO:0044444//cytoplasmic part;GO:0016020//membrane	GO:0004674//protein serine/threonine kinase activity;GO:0046872//metal ion binding;GO:0032559	GO:0010118//stomatal movement;GO:0032412//regulation of ion transmembrane transporter activity;GO:0009755//hormone-mediated signaling pathway;GO:0006464//cellular protein modification process	gi|255559179|ref|XP_002520611.1|/0/calcium-dependent protein kinase, putative [Ricinus communis]
Pbr020453.1	528	124	45	44.4454	16.9534	-1.39046	Down	4.75142e-09	3.83215e-08	K06892|1|2e-32|136|pop:POPTR_550478|;K05933|2|4e-30|128|gmx:100784455|aminocyclopropanecarboxylate oxidase [EC:1.14.17.4];K05278|3|1e-29|127|zma:100272992|flavonol synthase [EC:1.14.11.23]	-	GO:0016706//oxidoreductase activity, acting on paired donors, with incorporation or reduction of molecular oxygen, 2-oxoglutarate as one donor, and incorporation of one atom each of oxygen into both donors;GO:0016701//oxidoreductase activity, acting on single donors with incorporation of molecular oxygen	GO:0051553	gi|224061385|ref|XP_002300453.1|/2.44039e-66/predicted protein [Populus trichocarpa]
Pbr001188.1	1362	135	49	18.7584	7.15646	-1.39022	Down	9.89202e-10	8.49768e-09	K05298|1|0.0|773|gmx:732571|glyceraldehyde-3-phosphate dehydrogenase (NADP+) (phosphorylating) [EC:1.2.1.13]	GO:0009532//plastid stroma;GO:0009526//plastid envelope;GO:0009534//chloroplast thylakoid;GO:0005576//extracellular region	GO:0000166//nucleotide binding	GO:0009314//response to radiation;GO:0010038//response to metal ion;GO:0019318//hexose metabolic process;GO:0015977//carbon fixation;GO:0034285;GO:0006950//response to stress	gi|381393062|gb|AFG28405.1|/0/glyceraldehyde-3-phosphate dehydrogenase B [Pyrus x bretschneideri]
Pbr009591.1	1356	77	28	10.7466	4.1075	-1.38754	Down	4.3202e-06	2.49167e-05	-	GO:0043231//intracellular membrane-bounded organelle;GO:0044444//cytoplasmic part;GO:0016020//membrane	GO:0005543//phospholipid binding;GO:0016491//oxidoreductase activity;GO:0005515//protein binding	GO:0009987//cellular process	gi|356507716|ref|XP_003522610.1|/9.53797e-159/PREDICTED: putative clathrin assembly protein At2g25430-like [Glycine max]
Pbr008159.1	531	154	56	54.8865	20.9784	-1.38754	Down	7.00306e-11	6.59471e-10	-	-	-	-	-
Pbr011378.1	570	371	135	123.179	47.1127	-1.38657	Down	3.85342e-24	7.09118e-23	-	-	-	-	-
Pbr030150.1	1785	129	47	13.677	5.23768	-1.38475	Down	2.602e-09	2.14872e-08	K13420|1|1e-63|242|sbi:SORBI_06g028760|LRR receptor-like serine/threonine-protein kinase FLS2 [EC:2.7.11.1]	-	GO:0003824//catalytic activity	-	gi|225460700|ref|XP_002267183.1|/1.65771e-156/PREDICTED: LRR receptor-like serine/threonine-protein kinase FLS2-like [Vitis vinifera]
Pbr040433.1	969	1287	469	251.359	96.2783	-1.38446	Down	1.86218e-79	9.81742e-78	-	-	-	-	gi|302398701|gb|ADL36645.1|/7.51584e-138/C2H2L domain class transcription factor [Malus x domestica]
Pbr026414.1	924	107	39	21.9155	8.39599	-1.38418	Down	6.05192e-08	4.37806e-07	-	-	-	-	gi|334188533|ref|NP_001190582.1|/6.30524e-46/heavy metal transport/detoxification domain-containing protein [Arabidopsis thaliana]
Pbr028308.1	1386	203	74	27.7186	10.6206	-1.384	Down	7.54942e-14	8.75444e-13	K12134|1|6e-26|117|aly:ARALYDRAFT_904154|circadian clock associated 1;K12133|3|6e-26|117|ath:AT1G01060|LATE ELONGATED HYPOCOTYL	-	-	-	gi|302398987|gb|ADL36788.1|/0/MYBR domain class transcription factor [Malus x domestica]
Pbr001465.1	1407	96	35	12.9127	4.94827	-1.38379	Down	2.93862e-07	1.96212e-06	-	GO:0009532//plastid stroma	GO:0032559	-	gi|359481752|ref|XP_002270571.2|/0/PREDICTED: ribulose bisphosphate carboxylase/oxygenase activase 1, chloroplastic-like [Vitis vinifera]
Pbr005171.1	1449	74	27	9.66501	3.70659	-1.38268	Down	7.06398e-06	3.95632e-05	K14489|1|3e-22|104|vvi:100263145|arabidopsis histidine kinase 2/3/4 (cytokinin receptor) [EC:2.7.13.3]	GO:0044464//cell part	GO:0043167//ion binding;GO:0008422//beta-glucosidase activity	GO:0044238//primary metabolic process	gi|224109524|ref|XP_002333242.1|/0/predicted protein [Populus trichocarpa]
Pbr011973.1	2745	471	172	32.4726	12.4642	-1.38143	Down	4.63664e-30	1.02115e-28	-	-	-	-	gi|224108659|ref|XP_002314926.1|/0/predicted protein [Populus trichocarpa]
Pbr013230.1	195	824	301	799.708	307.052	-1.38099	Down	2.54964e-51	8.92668e-50	-	-	-	-	-
Pbr022654.1	1761	186	68	19.9891	7.6812	-1.37981	Down	9.34158e-13	1.01033e-11	K09571|1|1e-15|83.2|bdi:100836575|FK506-binding protein 4/5 [EC:5.2.1.8]	-	-	-	gi|255549607|ref|XP_002515855.1|/0/fk506 binding protein, putative [Ricinus communis]
Pbr006043.1	4512	93	34	3.90079	1.49896	-1.37981	Down	4.78608e-07	3.11272e-06	K10357|1|0.0|1463|aly:ARALYDRAFT_887631|myosin V;K03165|3|0.0|1051|ota:Ot06g03550|DNA topoisomerase III [EC:5.99.1.2]	GO:0015629//actin cytoskeleton	GO:0008092//cytoskeletal protein binding;GO:0017111//nucleoside-triphosphatase activity;GO:0032559	-	gi|224070005|ref|XP_002303100.1|/0/predicted protein [Populus trichocarpa]
Pbr027856.1	2280	175	64	14.5259	5.58373	-1.37932	Down	4.43814e-12	4.5633e-11	K09291|1|6e-10|64.7|gmx:100811882|nucleoprotein TPR;K11498|3|3e-09|62.4|ath:AT3G10180|centromeric protein E;K10405|4|5e-09|61.6|aly:ARALYDRAFT_490168|kinesin family member C1;K06636|5|3e-08|59.3|pop:POPTR_559701|structural maintenance of chromosome 1	-	-	-	gi|225430316|ref|XP_002282750.1|/0/PREDICTED: uncharacterized protein LOC100262916 [Vitis vinifera]
Pbr034249.1	1332	1199	439	170.355	65.5601	-1.37765	Down	1.31496e-73	6.34458e-72	K10255|1|0.0|738|vvi:100248377|omega-6 fatty acid desaturase (delta-12 desaturase) [EC:1.14.19.-]	GO:0009941//chloroplast envelope	GO:0016705//oxidoreductase activity, acting on paired donors, with incorporation or reduction of molecular oxygen	GO:0006631//fatty acid metabolic process	gi|359494889|ref|XP_003634863.1|/0/PREDICTED: omega-6 fatty acid desaturase, chloroplastic-like [Vitis vinifera]
Pbr005987.1	165	71	26	81.4354	31.345	-1.37742	Down	1.15572e-05	6.27343e-05	-	GO:0031224//intrinsic to membrane	-	-	gi|197309258|gb|ACH60980.1|/6.42108e-14/rare cold inducible protein [Pseudotsuga menziesii]
Pbr009562.1	816	436	160	101.12	39.004	-1.37437	Down	9.66642e-28	2.00441e-26	K00522|1|7e-100|361|pop:POPTR_822369|ferritin heavy chain [EC:1.16.3.1]	GO:0009536//plastid	GO:0016724;GO:0005506//iron ion binding	GO:0008152//metabolic process;GO:0000041//transition metal ion transport;GO:0006875//cellular metal ion homeostasis	gi|72256932|gb|AAZ67353.1|/2.66579e-119/chloroplast ferritin [Malus x domestica]
Pbr021343.1	1605	444	163	52.3537	20.2019	-1.3738	Down	3.32814e-28	7.01298e-27	-	-	GO:0016491//oxidoreductase activity;GO:0050662//coenzyme binding	GO:0008152//metabolic process	gi|341819340|gb|AEK87147.1|/0/berberine bridge enzyme [Hevea brasiliensis]
Pbr024015.2	1158	98	36	16.0161	6.18405	-1.3729	Down	2.60428e-07	1.75346e-06	K00517|1|5e-107|385|ath:AT3G48360|[EC:1.14.-.-];K04498|3|2e-12|72.0|vvi:100251243|E1A/CREB-binding protein [EC:2.3.1.48]	GO:0043231//intracellular membrane-bounded organelle	GO:0005515//protein binding	GO:0000302//response to reactive oxygen species;GO:0009756//carbohydrate mediated signaling;GO:0048229//gametophyte development;GO:0051347//positive regulation of transferase activity;GO:0048511//rhythmic process;GO:0006970//response to osmotic stress;GO:0009755//hormone-mediated signaling pathway	gi|255540423|ref|XP_002511276.1|/9.16669e-144/protein binding protein, putative [Ricinus communis]
Pbr030340.1	2136	166	61	14.7077	5.68078	-1.37241	Down	1.87607e-11	1.84759e-10	K05681|1|3e-39|162|cme:CMS467C|ATP-binding cassette, subfamily G (WHITE), member 2;K12843|3|5e-33|141|vvi:100248403|U4/U6 small nuclear ribonucleoprotein PRP3;K01990|4|1e-09|63.9|cme:CMR388C|ABC-2 type transport system ATP-binding protein;K05658|5|2e-08|59.3|sbi:SORBI_07g003520|ATP-binding cassette, subfamily B (MDR/TAP), member 1	GO:0044464//cell part	GO:0017111//nucleoside-triphosphatase activity;GO:0005363//maltose transmembrane transporter activity;GO:0032559	GO:0009207	gi|225436522|ref|XP_002273792.1|/0/PREDICTED: ABC transporter G family member 3 [Vitis vinifera]
Pbr009588.1	2484	174	64	13.2567	5.12516	-1.37106	Down	6.37234e-12	6.45962e-11	K09291|1|7e-12|71.2|gmx:100811882|nucleoprotein TPR;K06675|4|9e-10|64.3|bdi:100831033|structural maintenance of chromosome 4	-	-	-	gi|225430316|ref|XP_002282750.1|/0/PREDICTED: uncharacterized protein LOC100262916 [Vitis vinifera]
Pbr013577.1	1842	57	21	5.85631	2.26782	-1.36869	Down	9.46948e-05	0.000446636	K01051|1|6e-136|483|gmx:100802881|pectinesterase [EC:3.1.1.11]	GO:0005618//cell wall	GO:0030234//enzyme regulator activity;GO:0004091//carboxylesterase activity	GO:0071555//cell wall organization	gi|119507461|dbj|BAF42038.1|/0/pectin methylesterase 1 [Pyrus communis]
Pbr022157.1	1233	373	138	57.2512	22.2636	-1.36262	Down	1.13962e-23	2.06653e-22	K00924|1|5e-116|416|aly:ARALYDRAFT_494273|[EC:2.7.1.-];K05658|5|3e-86|317|vvi:100262734|ATP-binding cassette, subfamily B (MDR/TAP), member 1	-	GO:0004672//protein kinase activity;GO:0032559	GO:0006464//cellular protein modification process	gi|225427370|ref|XP_002282904.1|/1.43936e-142/PREDICTED: probable receptor-like protein kinase At5g47070 [Vitis vinifera]
Pbr018022.1	1482	116	43	14.8132	5.77165	-1.35983	Down	2.5925e-08	1.94662e-07	K00901|1|7e-136|482|ppp:PHYPADRAFT_106363|diacylglycerol kinase [EC:2.7.1.107]	-	GO:0016301//kinase activity	GO:0007186//G-protein coupled receptor signaling pathway;GO:0006796//phosphate-containing compound metabolic process	gi|356515212|ref|XP_003526295.1|/0/PREDICTED: diacylglycerol kinase iota-like [Glycine max]
Pbr037311.1	1662	194	72	22.0907	8.61749	-1.3581	Down	5.8006e-13	6.3669e-12	-	-	-	-	gi|356558266|ref|XP_003547428.1|/2.11453e-150/PREDICTED: uncharacterized protein LOC100814409 [Glycine max]
Pbr009504.1	2853	94	35	6.23541	2.44031	-1.35342	Down	6.09698e-07	3.91126e-06	K13428|1|6e-175|613|aly:ARALYDRAFT_488953|LRR receptor-like serine/threonine-protein kinase EFR [EC:2.7.11.1];K13420|3|2e-116|418|pop:POPTR_1075175|LRR receptor-like serine/threonine-protein kinase FLS2 [EC:2.7.11.1]	-	GO:0016301//kinase activity	-	gi|255577438|ref|XP_002529598.1|/0/receptor-kinase, putative [Ricinus communis]
Pbr039988.1	2424	940	350	73.3896	28.722	-1.35342	Down	1.37383e-56	5.27678e-55	-	-	GO:0016778	GO:0006163//purine nucleotide metabolic process	gi|297737338|emb|CBI26539.3|/0/unnamed protein product [Vitis vinifera]
Pbr009953.1	1092	169	63	29.2889	11.4762	-1.35171	Down	2.11238e-11	2.06615e-10	-	-	GO:0003677//DNA binding	GO:0006351//transcription, DNA-dependent	gi|225437154|ref|XP_002280618.1|/3.20455e-127/PREDICTED: heat stress transcription factor A-6b [Vitis vinifera]
Pbr017997.1	1392	201	75	27.3272	10.7177	-1.35035	Down	2.82312e-13	3.16879e-12	-	-	GO:0005488//binding	-	gi|225458852|ref|XP_002283336.1|/1.69878e-134/PREDICTED: F-box protein At3g12350 [Vitis vinifera]
Pbr000007.1	1542	501	187	61.4883	24.1233	-1.34988	Down	7.93798e-31	1.79899e-29	K00850|1|0.0|668|rcu:RCOM_0880730|6-phosphofructokinase [EC:2.7.1.11]	GO:0043234//protein complex;GO:0043231//intracellular membrane-bounded organelle;GO:0044444//cytoplasmic part	GO:0005488//binding;GO:0016301//kinase activity	GO:0006007//glucose catabolic process	gi|255568098|ref|XP_002525025.1|/0/phosphofructokinase, putative [Ricinus communis]
Pbr028580.1	2940	75	28	4.82784	1.89448	-1.34958	Down	9.00454e-06	4.96778e-05	K04733|1|7e-59|227|smo:SELMODRAFT_230241|interleukin-1 receptor-associated kinase 4 [EC:2.7.11.1];K00924|3|7e-59|227|ath:AT3G59420|[EC:2.7.1.-]	-	GO:0016301//kinase activity	-	gi|339431366|gb|AEJ72559.1|/3.82935e-172/putative serine/threonine kinase [Malus x domestica]
Pbr035931.1	573	281	105	92.8091	36.4514	-1.34829	Down	6.1029e-18	8.82755e-17	-	-	-	-	gi|388494072|gb|AFK35102.1|/6.33686e-61/unknown [Lotus japonicus]
Pbr041427.1	1500	99	37	12.4906	4.9067	-1.34802	Down	3.31064e-07	2.19496e-06	K15400|1|4e-59|227|vvi:100245819|omega-hydroxypalmitate O-feruloyl transferase [EC:2.3.1.188]	-	GO:0016747//transferase activity, transferring acyl groups other than amino-acyl groups	-	gi|225469071|ref|XP_002270329.1|/2.67771e-157/PREDICTED: omega-hydroxypalmitate O-feruloyl transferase [Vitis vinifera]
Pbr002511.1	1581	262	98	31.3623	12.3303	-1.34683	Down	8.38542e-17	1.14327e-15	-	GO:0043231//intracellular membrane-bounded organelle	-	-	gi|255586750|ref|XP_002533995.1|/0/conserved hypothetical protein [Ricinus communis]
Pbr011765.1	1734	131	49	14.2975	5.62117	-1.34683	Down	4.21208e-09	3.42141e-08	K06685|1|7e-14|77.4|aly:ARALYDRAFT_492950|maintenance of ploidy protein MOB1 (MPS1 binder 1)	-	-	-	gi|302398837|gb|ADL36713.1|/3.37711e-106/HD domain class transcription factor [Malus x domestica]
Pbr041168.1	390	700	262	339.682	133.634	-1.3459	Down	3.12014e-42	9.31234e-41	-	-	-	-	gi|224078081|ref|XP_002305484.1|/1.3393e-27/predicted protein [Populus trichocarpa]
Pbr009835.1	897	56	21	11.815	4.657	-1.34315	Down	0.000136927	0.000626354	-	-	-	-	gi|224062920|ref|XP_002300932.1|/7.31568e-52/predicted protein [Populus trichocarpa]
Pbr041495.1	1611	72	27	8.45816	3.33386	-1.34315	Down	1.47076e-05	7.8647e-05	K08790|1|0.0|634|ppp:PHYPADRAFT_131231|serine/threonine kinase 38 [EC:2.7.11.1]	-	GO:0004674//protein serine/threonine kinase activity;GO:0032559	GO:0006464//cellular protein modification process	gi|255546075|ref|XP_002514097.1|/0/serine/threonine-protein kinase, putative [Ricinus communis]
Pbr017262.1	1050	221	83	39.8329	15.7242	-1.34098	Down	2.5701e-14	3.06895e-13	K09060|1|3e-110|396|vvi:100258205|plant G-box-binding factor	-	GO:0005488//binding	-	gi|302398637|gb|ADL36613.1|/3.34098e-150/BZIP domain class transcription factor [Malus x domestica]
Pbr002178.1	1005	338	127	63.6487	25.1372	-1.34031	Down	4.28158e-21	7.00993e-20	K07119|1|1e-13|75.5|smo:SELMODRAFT_179322|;K00344|4|2e-12|71.2|osa:4331066|NADPH2:quinone reductase [EC:1.6.5.5]	GO:0009528//plastid inner membrane;GO:0009534//chloroplast thylakoid	GO:0046914//transition metal ion binding;GO:0016655//oxidoreductase activity, acting on NADH or NADPH, quinone or similar compound as acceptor	GO:0008152//metabolic process	gi|224060149|ref|XP_002300061.1|/9.43542e-131/predicted protein [Populus trichocarpa]
Pbr024501.1	3156	508	191	30.4625	12.0386	-1.33937	Down	6.97842e-31	1.58415e-29	K01537|1|0.0|1802|pop:POPTR_731397|Ca2+-transporting ATPase [EC:3.6.3.8]	GO:0031227//intrinsic to endoplasmic reticulum membrane	GO:0043169//cation binding;GO:0019829//cation-transporting ATPase activity;GO:0016757//transferase activity, transferring glycosyl groups;GO:0032559	GO:0009206;GO:0070838//divalent metal ion transport	gi|359489590|ref|XP_002264585.2|/0/PREDICTED: calcium-transporting ATPase, endoplasmic reticulum-type-like [Vitis vinifera]
Pbr038608.1	1389	242	91	32.9725	13.0322	-1.33918	Down	1.64588e-15	2.09642e-14	K09287|1|2e-42|172|vvi:100262843|RAV-like factor	-	-	-	gi|225426506|ref|XP_002271695.1|/1.60751e-84/PREDICTED: B3 domain-containing protein Os03g0120900-like [Vitis vinifera]
Pbr020151.1	2226	61	23	5.18613	2.05533	-1.33529	Down	7.32792e-05	0.000352569	-	-	-	-	gi|357447075|ref|XP_003593813.1|/8.6333e-89/Inversin [Medicago truncatula]
Pbr020122.1	2685	289	109	20.3701	8.07535	-1.33485	Down	3.75162e-18	5.46125e-17	K13415|1|4e-55|214|rcu:RCOM_0478150|protein brassinosteroid insensitive 1 [EC:2.7.10.1 2.7.11.1];K00924|4|1e-53|210|ath:AT1G75820|[EC:2.7.1.-]	GO:0005618//cell wall;GO:0016020//membrane	GO:0016301//kinase activity	-	gi|255538650|ref|XP_002510390.1|/0/lrr receptor protein kinase, putative [Ricinus communis]
Pbr015469.1	183	53	20	54.8105	21.7399	-1.3341	Down	0.000225072	0.00099073	-	GO:0043231//intracellular membrane-bounded organelle	-	GO:0048513//organ development	gi|224143475|ref|XP_002324968.1|/1.96049e-15/predicted protein [Populus trichocarpa]
Pbr025765.1	786	90	34	21.67	8.6047	-1.3325	Down	1.42238e-06	8.77232e-06	K13348|1|3e-81|299|gmx:100816797|protein Mpv17	GO:0031224//intrinsic to membrane	-	-	gi|255573125|ref|XP_002527492.1|/2.30232e-80/Protein SYM1, putative [Ricinus communis]
Pbr021374.1	960	262	99	51.6499	20.5137	-1.33218	Down	1.50451e-16	2.034e-15	K01807|1|4e-99|359|vvi:100240835|ribose 5-phosphate isomerase A [EC:5.3.1.6]	GO:0009536//plastid	GO:0016861//intramolecular oxidoreductase activity, interconverting aldoses and ketoses	GO:0006098//pentose-phosphate shunt	gi|225444205|ref|XP_002270834.1|/4.43112e-98/PREDICTED: ribose-5-phosphate isomerase A [Vitis vinifera]
Pbr007428.1	669	299	113	84.5832	33.5994	-1.33194	Down	1.13683e-18	1.69741e-17	K05298|1|6e-07|52.4|vvi:100246378|glyceraldehyde-3-phosphate dehydrogenase (NADP+) (phosphorylating) [EC:1.2.1.13]	GO:0009536//plastid	-	-	gi|296083572|emb|CBI23563.3|/1.23841e-46/unnamed protein product [Vitis vinifera]
Pbr001279.1	1425	156	59	20.718	8.236	-1.33087	Down	2.05062e-10	1.86481e-09	K08237|1|4e-62|237|ath:AT1G01420|hydroquinone glucosyltransferase [EC:2.4.1.218]	-	GO:0016757//transferase activity, transferring glycosyl groups	-	gi|269819292|gb|ACZ44836.1|/2.59113e-170/glycosyltransferase [Pyrus communis]
Pbr005780.1	1092	66	25	11.4383	4.55404	-1.32865	Down	3.9299e-05	0.000197719	-	-	-	GO:0006351//transcription, DNA-dependent	gi|307136305|gb|ADN34129.1|/4.08208e-98/high mobility group family [Cucumis melo subsp. melo]
Pbr025958.1	618	132	50	40.4226	16.0939	-1.32865	Down	5.31232e-09	4.26313e-08	-	GO:0031224//intrinsic to membrane	GO:0015171//amino acid transmembrane transporter activity	GO:0015801//aromatic amino acid transport;GO:0015711//organic anion transport	gi|363814354|ref|NP_001242816.1|/4.66843e-87/uncharacterized protein LOC100777963 [Glycine max]
Pbr013945.1	1458	760	288	98.6496	39.2929	-1.32804	Down	8.15818e-45	2.58459e-43	-	-	-	-	gi|255539521|ref|XP_002510825.1|/9.31539e-99/conserved hypothetical protein [Ricinus communis]
Pbr042637.1	2202	1240	471	106.572	42.5484	-1.32465	Down	9.72138e-72	4.58517e-70	-	GO:0016020//membrane;GO:0009536//plastid	GO:0016778;GO:0015291//secondary active transmembrane transporter activity	GO:0009725//response to hormone stimulus;GO:0006163//purine nucleotide metabolic process;GO:0006950//response to stress;GO:0006810//transport	gi|225442114|ref|XP_002273796.1|/0/PREDICTED: GTP pyrophosphokinase-like [Vitis vinifera]
Pbr009824.1	1440	229	87	30.0962	12.0181	-1.32437	Down	1.56924e-14	1.89538e-13	K01590|1|0.0|840|vvi:100258141|histidine decarboxylase [EC:4.1.1.22]	-	GO:0016831//carboxy-lyase activity;GO:0048037//cofactor binding	GO:0003006//developmental process involved in reproduction;GO:0019752//carboxylic acid metabolic process	gi|225463912|ref|XP_002266398.1|/0/PREDICTED: histidine decarboxylase-like [Vitis vinifera]
Pbr025357.1	450	150	57	63.0838	25.1966	-1.32404	Down	5.345e-10	4.68442e-09	K05765|1|3e-62|234|gmx:100819975|cofilin	GO:0044464//cell part	GO:0008092//cytoskeletal protein binding	-	gi|372477773|gb|AEX97081.1|/2.07935e-63/actin depolymerizing factor [Malus x domestica]
Pbr042913.1	1035	121	46	22.125	8.84091	-1.32341	Down	2.55196e-08	1.91776e-07	K00434|1|2e-144|510|gmx:100799504|L-ascorbate peroxidase [EC:1.11.1.11]	GO:0044436;GO:0009534//chloroplast thylakoid	GO:0016209//antioxidant activity;GO:0005506//iron ion binding	GO:0006950//response to stress;GO:0008152//metabolic process	gi|302141995|emb|CBI19198.3|/7.77616e-152/unnamed protein product [Vitis vinifera]
Pbr000240.1	2535	313	119	23.3671	9.33788	-1.32331	Down	2.69206e-19	4.09796e-18	K04733|1|6e-62|237|smo:SELMODRAFT_159261|interleukin-1 receptor-associated kinase 4 [EC:2.7.11.1];K13430|4|6e-59|227|pop:POPTR_548061|serine/threonine-protein kinase PBS1 [EC:2.7.11.1]	-	GO:0005488//binding;GO:0004672//protein kinase activity	-	gi|356527947|ref|XP_003532567.1|/0/PREDICTED: G-type lectin S-receptor-like serine/threonine-protein kinase At1g11410-like [Glycine max]
[truncated: 349 more rows]
