# Supplementary material for: Identification of Differentially Expressed Genes Related to Dehydration Resistance in a Highly Drought-Tolerant Pear, Pyrus betulaefolia, as through RNA-Seq
Source: PLOS journal article supplement (doi:10.1371/journal.pone.0149352), 2016-02-22
Supplement: S17 (10.1371/journal.pone.0149352.s017) [file journal.pone.0149352.s017]

## Sheet: Sheet1
Clustr ID	TF	Gene ID
1	AP2	Pbr001083.1
1	ARF	Pbr002342.1
1	ARF	Pbr012651.1
1	ARF	Pbr025597.1
1	ARF	Pbr027725.1
1	ARF	Pbr033804.1
1	ARF	Pbr037412.1
1	ARF	Pbr041836.1
1	BES1	Pbr031777.3
1	C2H2	Pbr005844.1
1	C2H2	Pbr012152.1
1	C2H2	Pbr012170.1
1	C2H2	Pbr019853.1
1	C2H2	Pbr029012.1
1	C2H2	Pbr030369.1
1	C2H2	Pbr031162.1
1	C2H2	Pbr032492.1
1	C2H2	Pbr035026.1
1	C2H2	Pbr036965.1
1	C2H2	Pbr041329.1
1	C2H2	Pbr042299.1
1	C3H	Pbr015556.1
1	C3H	Pbr028600.1
1	C3H	Pbr042646.1
1	CO-like	Pbr016562.1
1	CO-like	Pbr019957.1
1	CO-like	Pbr020281.1
1	CO-like	Pbr022230.1
1	CO-like	Pbr028831.1
1	CO-like	Pbr036464.1
1	CO-like	Pbr038936.1
1	CPP	Pbr009223.1
1	CPP	Pbr040384.1
1	DBB	Pbr022361.1
1	DBB	Pbr029421.1
1	DBB	Pbr032616.1
1	DBB	Pbr034751.1
1	DBB	Pbr042773.1
1	Dof	Pbr000385.1
1	Dof	Pbr003628.1
1	Dof	Pbr016236.1
1	Dof	Pbr019278.1
1	Dof	Pbr020828.1
1	Dof	Pbr025072.1
1	Dof	Pbr032366.1
1	Dof	Pbr033924.1
1	Dof	Pbr035111.1
1	Dof	Pbr038445.1
1	ERF	Pbr005446.1
1	ERF	Pbr008796.1
1	ERF	Pbr014125.1
1	ERF	Pbr019145.1
1	ERF	Pbr029834.1
1	ERF	Pbr039302.1
1	FAR1	Pbr014753.1
1	FAR1	Pbr026780.1
1	G2-like	Pbr007679.1
1	G2-like	Pbr009554.1
1	G2-like	Pbr014066.1
1	G2-like	Pbr016308.1
1	G2-like	Pbr016928.2
1	G2-like	Pbr016995.1
1	G2-like	Pbr019429.1
1	G2-like	Pbr030940.1
1	G2-like	Pbr037010.1
1	GATA	Pbr005051.1
1	GATA	Pbr013757.1
1	GATA	Pbr015599.1
1	GATA	Pbr019838.1
1	GATA	Pbr036766.1
1	GRAS	Pbr001048.1
1	GRAS	Pbr003874.1
1	GRAS	Pbr003875.1
1	GRAS	Pbr004512.1
1	GRAS	Pbr005254.1
1	GRAS	Pbr005472.1
1	GRAS	Pbr014064.1
1	GRAS	Pbr014306.1
1	GRAS	Pbr016997.1
1	GRAS	Pbr017150.1
1	GRAS	Pbr018916.1
1	GRAS	Pbr024319.1
1	GRAS	Pbr032804.1
1	GRAS	Pbr034525.1
1	HB-other	Pbr002620.1
1	HB-other	Pbr026750.1
1	HB-other	Pbr027816.1
1	HD-ZIP	Pbr017942.1
1	HD-ZIP	Pbr006330.2
1	HD-ZIP	Pbr029255.1
1	HD-ZIP	Pbr018089.3
1	HD-ZIP	Pbr034468.1
1	HD-ZIP	Pbr000180.1
1	HD-ZIP	Pbr013948.1
1	HD-ZIP	Pbr037485.1
1	HD-ZIP	Pbr042103.1
1	HD-ZIP	Pbr016310.4
1	HD-ZIP	Pbr005447.1
1	MYB	Pbr001950.1
1	MYB	Pbr003370.1
1	MYB	Pbr009823.1
1	MYB	Pbr011441.1
1	MYB	Pbr013413.1
1	MYB	Pbr014381.1
1	MYB	Pbr015230.1
1	MYB	Pbr017533.1
1	MYB	Pbr020365.1
1	MYB	Pbr024492.1
1	MYB	Pbr024978.1
1	MYB	Pbr027988.1
1	MYB	Pbr038869.1
1	MYB	Pbr041525.1
1	MYB	Pbr042313.1
1	MYB_related	Pbr004606.1
1	MYB_related	Pbr008287.1
1	MYB_related	Pbr008470.1
1	MYB_related	Pbr012635.1
1	MYB_related	Pbr015239.1
1	MYB_related	Pbr018084.1
1	MYB_related	Pbr038996.1
1	MYB_related	Pbr042132.1
1	NAC	Pbr021138.1
1	NAC	Pbr023084.1
1	NAC	Pbr025899.1
1	NF-YB	Pbr020508.1
1	NF-YB	Pbr023945.1
1	NF-YC	Pbr010560.1
1	NF-YC	Pbr036886.1
1	Nin-like	Pbr032211.1
1	SBP	Pbr018552.1
1	SBP	Pbr029987.1
1	SBP	Pbr037761.1
1	SRS	Pbr019593.1
1	SRS	Pbr027651.1
1	TALE	Pbr022850.1
1	TALE	Pbr027897.1
1	TCP	Pbr011454.1
1	TCP	Pbr018814.1
1	TCP	Pbr025856.1
1	TCP	Pbr031206.1
1	TCP	Pbr038238.1
1	TCP	Pbr039105.1
1	TCP	Pbr039609.1
1	Trihelix	Pbr009276.1
1	Trihelix	Pbr009547.1
1	Trihelix	Pbr010535.1
1	Trihelix	Pbr010927.1
1	Trihelix	Pbr015653.1
1	Trihelix	Pbr025725.1
1	Trihelix	Pbr036910.1
1	Trihelix	Pbr038634.1
1	VOZ	Pbr000422.1
1	WOX	Pbr006773.2
1	WRKY	Pbr001724.1
1	WRKY	Pbr008278.1
1	WRKY	Pbr009057.1
1	WRKY	Pbr041858.1
1	YABBY	Pbr003157.1
1	YABBY	Pbr010651.1
1	ZF-HD	Pbr040686.1
1	bHLH	Pbr000228.1
1	bHLH	Pbr000622.1
1	bHLH	Pbr000853.1
1	bHLH	Pbr005918.1
1	bHLH	Pbr007246.1
1	bHLH	Pbr009179.1
1	bHLH	Pbr009756.1
1	bHLH	Pbr011696.1
1	bHLH	Pbr013246.1
1	bHLH	Pbr015480.2
1	bHLH	Pbr017379.1
1	bHLH	Pbr021888.1
1	bHLH	Pbr023206.1
1	bHLH	Pbr025316.1
1	bHLH	Pbr027487.1
1	bHLH	Pbr027564.1
1	bHLH	Pbr030032.1
1	bHLH	Pbr030115.1
1	bHLH	Pbr032962.1
1	bHLH	Pbr034262.2
1	bHLH	Pbr034713.1
1	bHLH	Pbr037054.1
1	bHLH	Pbr040691.1
1	bHLH	Pbr041849.1
1	bZIP	Pbr004364.1
1	bZIP	Pbr012802.1
1	bZIP	Pbr026913.1
1	bZIP	Pbr030038.1
1	bZIP	Pbr036339.1
2	C3H	Pbr009535.1
2	C3H	Pbr010912.1
2	C3H	Pbr019807.1
2	ERF	Pbr013924.1
2	ERF	Pbr015502.1
2	ERF	Pbr023902.1
2	ERF	Pbr024467.1
2	ERF	Pbr038280.1
2	GATA	Pbr039067.1
2	GRAS	Pbr038494.1
2	GRAS	Pbr039366.2
2	HD-ZIP	Pbr018403.1
2	HD-ZIP	Pbr007829.1
2	HSF	Pbr005379.1
2	HSF	Pbr025141.1
2	MYB	Pbr000268.1
2	MYB	Pbr001520.1
2	MYB	Pbr011262.1
2	MYB	Pbr012624.1
2	MYB	Pbr018029.1
2	MYB	Pbr022028.1
2	NAC	Pbr013502.1
2	NAC	Pbr021741.1
2	WRKY	Pbr001425.1
2	WRKY	Pbr002914.1
2	WRKY	Pbr003660.1
2	WRKY	Pbr014160.1
2	WRKY	Pbr015939.1
2	WRKY	Pbr025002.1
2	bHLH	Pbr010573.1
2	bHLH	Pbr042466.1
2	bZIP	Pbr006046.1
2	bZIP	Pbr014120.1
3	ARF	Pbr010582.1
3	ARF	Pbr028076.1
3	B3	Pbr013136.1
3	B3	Pbr014639.1
3	B3	Pbr027478.1
3	B3	Pbr038608.1
3	BES1	Pbr000539.1
3	BES1	Pbr020081.1
3	C2H2	Pbr019738.1
3	C2H2	Pbr020962.2
3	C2H2	Pbr021979.1
3	C2H2	Pbr023394.1
3	C2H2	Pbr025748.1
3	C2H2	Pbr026143.1
3	C2H2	Pbr028202.1
3	C2H2	Pbr028986.1
3	C2H2	Pbr033995.1
3	C2H2	Pbr041948.1
3	C2H2	Pbr042596.1
3	C3H	Pbr005182.1
3	C3H	Pbr015956.1
3	C3H	Pbr026044.1
3	C3H	Pbr033729.1
3	CAMTA	Pbr003453.1
3	CAMTA	Pbr011973.1
3	CPP	Pbr014084.1
3	CPP	Pbr016974.1
3	Dof	Pbr006745.1
3	Dof	Pbr020039.1
3	E2F/DP	Pbr011903.3
3	E2F/DP	Pbr042159.1
3	EIL	Pbr004574.1
3	ERF	Pbr000396.1
3	ERF	Pbr000398.1
3	ERF	Pbr001363.1
3	ERF	Pbr002083.1
3	ERF	Pbr003219.1
3	ERF	Pbr004315.1
3	ERF	Pbr006526.1
3	ERF	Pbr009571.1
3	ERF	Pbr010949.1
3	ERF	Pbr011102.1
3	ERF	Pbr011145.1
3	ERF	Pbr012684.1
3	ERF	Pbr013149.1
3	ERF	Pbr013631.1
3	ERF	Pbr015697.1
3	ERF	Pbr016049.2
3	ERF	Pbr016185.1
3	ERF	Pbr016222.1
3	ERF	Pbr017297.1
3	ERF	Pbr019494.1
3	ERF	Pbr019669.1
3	ERF	Pbr021011.1
3	ERF	Pbr022708.1
3	ERF	Pbr023044.1
3	ERF	Pbr023047.1
3	ERF	Pbr023899.1
3	ERF	Pbr024123.1
3	ERF	Pbr025302.1
3	ERF	Pbr025353.1
3	ERF	Pbr025354.1
3	ERF	Pbr025944.1
3	ERF	Pbr027726.1
3	ERF	Pbr030208.1
3	ERF	Pbr030418.1
3	ERF	Pbr030451.1
3	ERF	Pbr030540.1
3	ERF	Pbr030542.1
3	ERF	Pbr031251.1
3	ERF	Pbr032608.1
3	ERF	Pbr032764.1
3	ERF	Pbr033396.1
3	ERF	Pbr034761.1
3	ERF	Pbr037414.1
3	G2-like	Pbr003852.1
3	G2-like	Pbr013259.1
3	G2-like	Pbr018943.1
3	G2-like	Pbr032895.1
3	GATA	Pbr022349.1
3	GRAS	Pbr003868.1
3	GRAS	Pbr004607.1
3	GRAS	Pbr010864.1
3	GRAS	Pbr018918.1
3	GRAS	Pbr018920.1
3	GRAS	Pbr018921.1
3	GRAS	Pbr018923.1
3	GRAS	Pbr018924.1
3	GRAS	Pbr024234.1
3	GRAS	Pbr027347.1
3	GRAS	Pbr028415.1
3	GRAS	Pbr029392.1
3	GeBP	Pbr004400.1
3	HD-ZIP	Pbr035813.1
3	HD-ZIP	Pbr004979.1
3	HSF	Pbr002020.1
3	HSF	Pbr002038.1
3	HSF	Pbr005496.1
3	HSF	Pbr007777.1
3	HSF	Pbr012136.1
3	HSF	Pbr012846.1
3	HSF	Pbr014107.1
3	HSF	Pbr016805.1
3	HSF	Pbr030422.1
3	HSF	Pbr030436.1
3	LBD	Pbr013062.1
3	LBD	Pbr021980.1
3	LBD	Pbr023528.1
3	LSD	Pbr021365.1
3	MYB	Pbr000876.1
3	MYB	Pbr004276.1
3	MYB	Pbr008748.1
3	MYB	Pbr011095.1
3	MYB	Pbr012310.1
3	MYB	Pbr012357.1
3	MYB	Pbr014994.1
3	MYB	Pbr018024.1
3	MYB	Pbr019687.1
3	MYB	Pbr020295.1
3	MYB	Pbr025199.1
3	MYB	Pbr025360.1
3	MYB	Pbr028812.1
3	MYB	Pbr033383.1
3	MYB_related	Pbr013131.1
3	MYB_related	Pbr018915.1
3	MYB_related	Pbr023778.1
3	NAC	Pbr000315.1
3	NAC	Pbr007642.1
3	NAC	Pbr007673.1
3	NAC	Pbr015363.1
3	NAC	Pbr015364.1
3	NAC	Pbr016932.1
3	NAC	Pbr019663.1
3	NAC	Pbr020079.1
3	NAC	Pbr020642.1
3	NAC	Pbr021868.1
3	NAC	Pbr022332.1
3	NAC	Pbr024864.1
3	NAC	Pbr027295.1
3	NAC	Pbr027956.1
3	NAC	Pbr029956.1
3	NAC	Pbr030882.2
3	NAC	Pbr032231.1
3	NAC	Pbr040028.1
3	NAC	Pbr041034.1
3	NAC	Pbr041562.1
3	NF-X1	Pbr010904.1
3	NF-YB	Pbr034585.1
3	SBP	Pbr035121.1
3	WRKY	Pbr000122.1
3	WRKY	Pbr001238.1
3	WRKY	Pbr001424.1
3	WRKY	Pbr002913.1
3	WRKY	Pbr004885.1
3	WRKY	Pbr008639.1
3	WRKY	Pbr011544.2
3	WRKY	Pbr013092.1
3	WRKY	Pbr013623.1
3	WRKY	Pbr015019.1
3	WRKY	Pbr018725.1
3	WRKY	Pbr019026.1
3	WRKY	Pbr019030.1
3	WRKY	Pbr020000.1
3	WRKY	Pbr020001.1
3	WRKY	Pbr022408.1
3	WRKY	Pbr026903.1
3	WRKY	Pbr031548.1
3	WRKY	Pbr031922.1
3	WRKY	Pbr032698.1
3	WRKY	Pbr034115.1
3	WRKY	Pbr037452.1
3	WRKY	Pbr042883.1
3	ZF-HD	Pbr039094.1
3	bHLH	Pbr000207.1
3	bHLH	Pbr001568.2
3	bHLH	Pbr007168.1
3	bHLH	Pbr015624.1
3	bHLH	Pbr020204.1
3	bHLH	Pbr026439.1
3	bHLH	Pbr026823.1
3	bHLH	Pbr026824.1
3	bHLH	Pbr027424.1
3	bHLH	Pbr037113.1
3	bHLH	Pbr037618.1
3	bHLH	Pbr037679.1
3	bHLH	Pbr038574.1
3	bHLH	Pbr040944.1
3	bHLH	Pbr041312.1
3	bHLH	Pbr041470.1
3	bHLH	Pbr041632.1
3	bZIP	Pbr005860.1
3	bZIP	Pbr009074.1
3	bZIP	Pbr009262.1
3	bZIP	Pbr009654.1
3	bZIP	Pbr015119.3
3	bZIP	Pbr022894.1
3	bZIP	Pbr025283.1
3	bZIP	Pbr028081.1
3	bZIP	Pbr030829.1
3	bZIP	Pbr040479.1
4	ARR-B	Pbr011993.1
4	ARR-B	Pbr034277.2
4	C3H	Pbr015419.1
4	ERF	Pbr021047.1
4	ERF	Pbr025176.1
4	G2-like	Pbr006215.1
4	HD-ZIP	Pbr035756.1
4	HD-ZIP	Pbr039143.1
4	HSF	Pbr041474.1
4	LBD	Pbr023936.1
4	MYB	Pbr022669.1
4	NAC	Pbr002372.1
4	NAC	Pbr032225.1
4	NAC	Pbr032226.1
4	NF-YA	Pbr006945.1
4	NF-YB	Pbr000023.1
4	TALE	Pbr034311.1
4	bHLH	Pbr014375.1
4	bZIP	Pbr007566.2
4	bZIP	Pbr017262.1
4	bZIP	Pbr040390.1
5	AP2	Pbr025174.1
5	ARR-B	Pbr036239.1
5	B3	Pbr020043.1
5	BBR-BPC	Pbr022371.1
5	BES1	Pbr017252.1
5	C2H2	Pbr012192.1
5	C2H2	Pbr012193.2
5	C2H2	Pbr012907.1
5	C2H2	Pbr020403.1
5	C3H	Pbr022799.2
5	CO-like	Pbr013295.1
5	DBB	Pbr022786.1
5	Dof	Pbr007294.2
5	Dof	Pbr013550.1
5	Dof	Pbr018380.1
5	Dof	Pbr024493.1
5	Dof	Pbr029523.1
5	EIL	Pbr033210.1
5	ERF	Pbr038937.1
5	G2-like	Pbr022508.1
5	G2-like	Pbr031198.1
5	G2-like	Pbr035841.1
5	GRAS	Pbr007753.1
5	GRAS	Pbr009709.1
5	GRAS	Pbr016671.1
5	GRAS	Pbr018479.1
5	GRF	Pbr040068.1
5	HB-PHD	Pbr009810.1
5	HD-ZIP	Pbr028628.1
5	HD-ZIP	Pbr019166.1
5	HD-ZIP	Pbr008785.1
5	HD-ZIP	Pbr008410.2
5	M-type	Pbr006809.1
5	MYB	Pbr020250.1
5	MYB	Pbr028978.1
5	MYB	Pbr033988.1
5	MYB	Pbr035963.1
5	MYB_related	Pbr009477.1
5	MYB_related	Pbr038199.1
5	NF-YA	Pbr015248.1
5	RAV	Pbr034260.1
5	TALE	Pbr015799.1
5	TALE	Pbr001231.1
5	TALE	Pbr019357.1
5	TALE	Pbr001554.1
5	TCP	Pbr022498.1
5	Trihelix	Pbr019905.1
5	Trihelix	Pbr036348.1
5	Trihelix	Pbr041014.1
5	WRKY	Pbr007354.1
5	WRKY	Pbr025301.2
5	Whirly	Pbr008042.1
5	ZF-HD	Pbr019264.1
5	bHLH	Pbr018411.1
5	bHLH	Pbr025285.1
5	bHLH	Pbr029607.1
5	bHLH	Pbr030944.1
5	bHLH	Pbr038717.1
5	bZIP	Pbr022933.1
6	AP2	Pbr038562.1
6	ARR-B	Pbr020017.1
6	C2H2	Pbr028264.1
6	C2H2	Pbr040429.1
6	C3H	Pbr035834.1
6	CO-like	Pbr023570.1
6	DBB	Pbr005884.1
6	ERF	Pbr010138.1
6	ERF	Pbr012686.1
6	ERF	Pbr020024.1
6	ERF	Pbr020278.1
6	GRAS	Pbr022696.1
6	GRAS	Pbr028237.1
6	HD-ZIP	Pbr040074.1
6	MIKC	Pbr003650.1
6	MYB	Pbr012264.1
6	MYB	Pbr016851.1
6	MYB	Pbr028725.1
6	MYB_related	Pbr015587.1
6	NAC	Pbr012547.2
6	NAC	Pbr024863.1
6	NAC	Pbr027483.1
6	NAC	Pbr030459.1
6	NF-YA	Pbr031702.1
6	NF-YC	Pbr003581.1
6	SBP	Pbr038099.1
6	SRS	Pbr015636.2
6	WRKY	Pbr005390.1
6	WRKY	Pbr022698.1
6	WRKY	Pbr041200.1
6	bHLH	Pbr020294.1
6	bHLH	Pbr037384.1
6	bHLH	Pbr037716.1
7	ARF	Pbr011928.1
7	C2H2	Pbr025606.1
7	C3H	Pbr004096.1
7	Dof	Pbr001941.1
7	Dof	Pbr039077.1
7	ERF	Pbr016224.1
7	G2-like	Pbr027474.1
7	GRAS	Pbr003873.1
7	GRAS	Pbr013644.1
7	GRAS	Pbr017263.1
7	HSF	Pbr039282.1
7	MYB_related	Pbr003876.1
7	MYB_related	Pbr010850.1
7	MYB_related	Pbr028308.1
7	MYB_related	Pbr032057.1
7	MYB_related	Pbr033536.1
7	bZIP	Pbr022685.1
8	B3	Pbr025896.1
8	C2H2	Pbr020020.1
8	C2H2	Pbr027978.1
8	C3H	Pbr008285.1
8	C3H	Pbr010595.1
8	DBB	Pbr020473.1
8	EIL	Pbr004535.1
8	EIL	Pbr024739.1
8	EIL	Pbr024740.1
8	ERF	Pbr010139.1
8	ERF	Pbr018333.1
8	ERF	Pbr029055.1
8	ERF	Pbr030932.1
8	ERF	Pbr037846.1
8	G2-like	Pbr012187.1
8	GRAS	Pbr018922.1
8	GRF	Pbr019785.1
8	HD-ZIP	Pbr019804.1
8	HD-ZIP	Pbr013533.1
8	HD-ZIP	Pbr038266.1
8	LBD	Pbr030670.1
8	MYB	Pbr008630.1
8	MYB	Pbr013315.1
8	MYB	Pbr038922.1
8	MYB	Pbr042296.1
8	MYB_related	Pbr000749.2
8	MYB_related	Pbr035758.1
8	NAC	Pbr004500.1
8	NAC	Pbr016935.1
8	NAC	Pbr019289.1
8	NAC	Pbr021393.1
8	NAC	Pbr026949.2
8	NAC	Pbr038436.1
8	NF-YC	Pbr029016.1
8	Nin-like	Pbr027720.1
8	RAV	Pbr013255.1
8	S1Fa-like	Pbr008318.1
8	TALE	Pbr005909.1
8	TCP	Pbr001559.1
8	WRKY	Pbr000523.1
8	WRKY	Pbr002398.1
8	WRKY	Pbr015149.1
8	WRKY	Pbr029646.1
8	WRKY	Pbr039129.1
8	bHLH	Pbr001646.1
8	bHLH	Pbr006687.1
8	bHLH	Pbr009541.1
8	bZIP	Pbr019461.1
8	bZIP	Pbr028080.1
9	BES1	Pbr024193.1
9	G2-like	Pbr020045.1
9	GATA	Pbr040546.1
9	GATA	Pbr042397.1
9	WRKY	Pbr019675.1
10	C2H2	Pbr040433.1
10	Dof	Pbr007170.1
10	GRAS	Pbr024549.1
10	TCP	Pbr013906.1
10	WRKY	Pbr037640.1
10	bZIP	Pbr021041.1
11	AP2	Pbr002042.1
11	ARF	Pbr039066.1
11	Dof	Pbr000328.1
11	ERF	Pbr001362.1
11	ERF	Pbr012685.1
11	ERF	Pbr015698.1
11	ERF	Pbr025136.1
11	HSF	Pbr000538.1
11	MYB	Pbr019262.1
11	MYB	Pbr032528.1
11	NAC	Pbr033315.1
11	WRKY	Pbr019883.1
12	ERF	Pbr001361.1
12	bHLH	Pbr011113.1
13	FAR1	Pbr026779.1
15	ERF	Pbr013927.1
15	HSF	Pbr009953.1
15	HSF	Pbr012908.1
15	HSF	Pbr013953.1
15	HSF	Pbr019856.1
16	MYB	Pbr016625.1
16	MYB_related	Pbr034475.1
17	CO-like	Pbr040252.1
17	bHLH	Pbr041171.1
18	ZF-HD	Pbr033235.1
